# Supplementary material
Source: publisher figshare collection journal article supplement (https://acs.figshare.com/ndownloader/files/10153971)
Supplement: Supplementary file 1 [file 10153971]

 
data_cu_20170418A_0m_a
 
_audit_creation_method            'SHELXL-2014/7'
_shelx_SHELXL_version_number      '2014/7'
_chemical_name_systematic         2OK-1
_chemical_name_common             2OK-1
_chemical_melting_point           ?
_chemical_formula_moiety          C14H20O4
_chemical_formula_sum
 'C14 H20 O4' 
_chemical_formula_weight          252.30

loop_
 _atom_type_symbol
 _atom_type_description
 _atom_type_scat_dispersion_real
 _atom_type_scat_dispersion_imag
 _atom_type_scat_source
 'C'  'C'   0.0181   0.0091
 'International Tables Vol C Tables 4.2.6.8 and 6.1.1.4'
 'H'  'H'   0.0000   0.0000
 'International Tables Vol C Tables 4.2.6.8 and 6.1.1.4'
 'O'  'O'   0.0492   0.0322
 'International Tables Vol C Tables 4.2.6.8 and 6.1.1.4'
 
_space_group_crystal_system       orthorhombic
_space_group_IT_number            19
_space_group_name_H-M_alt         'P 21 21 21'
_space_group_name_Hall            'P 2ac 2ab'
 
_shelx_space_group_comment
;
The symmetry employed for this shelxl refinement is uniquely defined
by the following loop, which should always be used as a source of
symmetry information in preference to the above space-group names.
They are only intended as comments.
;
 
loop_
 _space_group_symop_operation_xyz
 'x, y, z'
 '-x+1/2, -y, z+1/2'
 '-x, y+1/2, -z+1/2'
 'x+1/2, -y+1/2, -z'
 
_cell_length_a                    9.0317(5)
_cell_length_b                    10.0478(5)
_cell_length_c                    15.5635(8)
_cell_angle_alpha                 90
_cell_angle_beta                  90
_cell_angle_gamma                 90
_cell_volume                      1412.37(13)
_cell_formula_units_Z             4
_cell_measurement_temperature     296(2)
_cell_measurement_reflns_used     4094
_cell_measurement_theta_min       10.459
_cell_measurement_theta_max       142.321
 
_exptl_crystal_description        needle
_exptl_crystal_colour             white
_exptl_crystal_density_meas       ?
_exptl_crystal_density_method     ?
_exptl_crystal_density_diffrn     1.187          
_exptl_crystal_F_000              544
_exptl_transmission_factor_min    ?
_exptl_transmission_factor_max    ?
_exptl_crystal_size_max           ?
_exptl_crystal_size_mid           ?
_exptl_crystal_size_min           ?
_exptl_absorpt_coefficient_mu     0.705
_shelx_estimated_absorpt_T_min    ?
_shelx_estimated_absorpt_T_max    ?
_exptl_absorpt_correction_type    none
_exptl_absorpt_correction_T_min   ?
_exptl_absorpt_correction_T_max   ?
_exptl_absorpt_process_details    ?
_exptl_absorpt_special_details    ?
_diffrn_ambient_temperature       296(2)
_diffrn_radiation_wavelength      1.54178
_diffrn_radiation_type            CuK\a
_diffrn_source                    ?
_diffrn_measurement_device_type   'Bruker APEX-II CCD'
_diffrn_measurement_method        '\f and \w scans'
_diffrn_detector_area_resol_mean  ?
_diffrn_reflns_number             12474
_diffrn_reflns_av_unetI/netI      0.1418
_diffrn_reflns_av_R_equivalents   0.1954
_diffrn_reflns_limit_h_min        -9
_diffrn_reflns_limit_h_max        11
_diffrn_reflns_limit_k_min        -11
_diffrn_reflns_limit_k_max        12
_diffrn_reflns_limit_l_min        -18
_diffrn_reflns_limit_l_max        19
_diffrn_reflns_theta_min          5.240
_diffrn_reflns_theta_max          72.465
_diffrn_reflns_theta_full         67.679
_diffrn_measured_fraction_theta_max   0.991
_diffrn_measured_fraction_theta_full  0.993
_diffrn_reflns_Laue_measured_fraction_max    0.991
_diffrn_reflns_Laue_measured_fraction_full   0.993
_diffrn_reflns_point_group_measured_fraction_max   0.989
_diffrn_reflns_point_group_measured_fraction_full  0.991
_reflns_number_total              2768
_reflns_number_gt                 2021
_reflns_threshold_expression      'I > 2\s(I)'
_reflns_Friedel_coverage          0.721
_reflns_Friedel_fraction_max      0.986
_reflns_Friedel_fraction_full     0.990
 
_reflns_special_details
;
 Reflections were merged by SHELXL according to the crystal
 class for the calculation of statistics and refinement.
 
 _reflns_Friedel_fraction is defined as the number of unique
 Friedel pairs measured divided by the number that would be
 possible theoretically, ignoring centric projections and
 systematic absences.
;
 
_computing_data_collection        'Bruker APEX2'
_computing_cell_refinement        'Bruker SAINT'
_computing_data_reduction         'Bruker SAINT'
_computing_structure_solution     'SHELXL-2014/7 (Sheldrick, 2014)'
_computing_structure_refinement 'SHELXL-2014/7 (Sheldrick, 2014)'
_computing_molecular_graphics     'Bruker SHELXTL'
_computing_publication_material   'Bruker SHELXTL'
_refine_special_details           ?
_refine_ls_structure_factor_coef  Fsqd
_refine_ls_matrix_type            full
_refine_ls_weighting_scheme       calc
_refine_ls_weighting_details
'w=1/[\s^2^(Fo^2^)+(0.2000P)^2^] where P=(Fo^2^+2Fc^2^)/3'
_atom_sites_solution_primary      ?
_atom_sites_solution_secondary    ?
_atom_sites_solution_hydrogens    geom
_refine_ls_hydrogen_treatment     constr
_refine_ls_extinction_method      none
_refine_ls_extinction_coef        .
_refine_ls_abs_structure_details
;
 Flack x determined using 544 quotients [(I+)-(I-)]/[(I+)+(I-)]
 (Parsons, Flack and Wagner, Acta Cryst. B69 (2013) 249-259).
;
_refine_ls_abs_structure_Flack    0.7(4)
_chemical_absolute_configuration  ad
_refine_ls_number_reflns          2768
_refine_ls_number_parameters      169
_refine_ls_number_restraints      0
_refine_ls_R_factor_all           0.1508
_refine_ls_R_factor_gt            0.1282
_refine_ls_wR_factor_ref          0.3227
_refine_ls_wR_factor_gt           0.2979
_refine_ls_goodness_of_fit_ref    1.110
_refine_ls_restrained_S_all       1.110
_refine_ls_shift/su_max           0.000
_refine_ls_shift/su_mean          0.000
 
loop_
 _atom_site_label
 _atom_site_type_symbol
 _atom_site_fract_x
 _atom_site_fract_y
 _atom_site_fract_z
 _atom_site_U_iso_or_equiv
 _atom_site_adp_type
 _atom_site_occupancy
 _atom_site_site_symmetry_order  
 _atom_site_calc_flag
 _atom_site_refinement_flags_posn
 _atom_site_refinement_flags_adp
 _atom_site_refinement_flags_occupancy
 _atom_site_disorder_assembly
 _atom_site_disorder_group
O001 O 0.4772(7) -1.2172(6) -1.4256(4) 0.0463(14) Uani 1 1 d . . . . .
H001 H 0.4356 -1.2842 -1.4435 0.069 Uiso 1 1 calc R U . . .
O002 O 0.3733(7) -1.4217(5) -1.5336(3) 0.0435(13) Uani 1 1 d . . . . .
O003 O 0.0476(7) -1.2721(6) -1.7515(4) 0.0488(15) Uani 1 1 d . . . . .
H003 H 0.0347 -1.2721 -1.6994 0.073 Uiso 1 1 calc R U . . .
C004 C 0.1845(9) -1.3393(8) -1.7713(5) 0.0372(16) Uani 1 1 d . . . . .
C005 C 0.3356(7) -1.4021(6) -1.6091(5) 0.0314(14) Uani 1 1 d . . . . .
C006 C 0.2491(8) -1.5038(6) -1.6554(4) 0.0304(13) Uani 1 1 d . . . . .
O007 O 0.5213(9) -1.0877(8) -1.6223(5) 0.075(2) Uani 1 1 d . . . . .
C008 C 0.3089(9) -1.2522(8) -1.7415(4) 0.0362(15) Uani 1 1 d . . . . .
H008 H 0.2989 -1.1578 -1.7563 0.043 Uiso 1 1 calc R U . . .
C009 C 0.3898(7) -1.1028(7) -1.4456(5) 0.0377(16) Uani 1 1 d . . . . .
H009 H 0.4564 -1.0263 -1.4508 0.045 Uiso 1 1 calc R U . . .
C00A C 0.4158(10) -1.1623(8) -1.6018(6) 0.0445(18) Uani 1 1 d . . . . .
C00B C 0.3812(7) -1.2804(7) -1.6539(4) 0.0328(14) Uani 1 1 d . . . . .
C00C C 0.3101(8) -1.1212(7) -1.5314(6) 0.0377(16) Uani 1 1 d . . . . .
H00C H 0.2360 -1.1917 -1.5245 0.045 Uiso 1 1 calc R U . . .
C00D C 0.1836(9) -1.4720(8) -1.7302(5) 0.0401(16) Uani 1 1 d . . . . .
H00D H 0.1331 -1.5395 -1.7586 0.048 Uiso 1 1 calc R U . . .
C00E C 0.2349(11) -1.6378(7) -1.6139(6) 0.050(2) Uani 1 1 d . . . . .
H00A H 0.1830 -1.6970 -1.6518 0.074 Uiso 1 1 calc R U . . .
H00B H 0.1808 -1.6293 -1.5610 0.074 Uiso 1 1 calc R U . . .
H00E H 0.3317 -1.6729 -1.6022 0.074 Uiso 1 1 calc R U . . .
C00F C 0.4669(9) -1.3039(10) -1.7385(6) 0.049(2) Uani 1 1 d . . . . .
H00F H 0.5459 -1.2423 -1.7527 0.059 Uiso 1 1 calc R U . . .
H00G H 0.4842 -1.3952 -1.7561 0.059 Uiso 1 1 calc R U . . .
C00G C 0.1888(13) -1.3535(11) -1.8690(6) 0.058(2) Uani 1 1 d . . . . .
H00H H 0.2771 -1.4000 -1.8856 0.087 Uiso 1 1 calc R U . . .
H00I H 0.1883 -1.2667 -1.8949 0.087 Uiso 1 1 calc R U . . .
H00J H 0.1036 -1.4025 -1.8880 0.087 Uiso 1 1 calc R U . . .
C00H C 0.2308(14) -0.9953(11) -1.5617(10) 0.074(3) Uani 1 1 d . . . . .
H00K H 0.1797 -1.0133 -1.6145 0.112 Uiso 1 1 calc R U . . .
H00L H 0.3021 -0.9258 -1.5708 0.112 Uiso 1 1 calc R U . . .
H00M H 0.1609 -0.9676 -1.5188 0.112 Uiso 1 1 calc R U . . .
C00I C 0.2825(11) -1.0747(14) -1.3746(8) 0.081(4) Uani 1 1 d . . . . .
H00N H 0.2212 -1.0005 -1.3901 0.121 Uiso 1 1 calc R U . . .
H00O H 0.3360 -1.0540 -1.3229 0.121 Uiso 1 1 calc R U . . .
H00P H 0.2216 -1.1516 -1.3650 0.121 Uiso 1 1 calc R U . . .
 
loop_
 _atom_site_aniso_label
 _atom_site_aniso_U_11
 _atom_site_aniso_U_22
 _atom_site_aniso_U_33
 _atom_site_aniso_U_23
 _atom_site_aniso_U_13
 _atom_site_aniso_U_12
O001 0.044(3) 0.050(3) 0.044(3) -0.014(2) -0.011(2) 0.007(2)
O002 0.062(3) 0.035(3) 0.034(3) 0.002(2) -0.009(2) -0.003(2)
O003 0.045(3) 0.052(3) 0.049(3) 0.003(3) -0.003(3) 0.023(3)
C004 0.038(4) 0.043(4) 0.031(3) -0.003(3) -0.004(3) 0.016(3)
C005 0.029(3) 0.025(3) 0.040(4) 0.003(3) -0.001(3) 0.003(2)
C006 0.035(3) 0.021(3) 0.035(3) 0.003(3) -0.005(3) 0.001(2)
O007 0.077(5) 0.076(5) 0.073(5) -0.003(4) 0.018(4) -0.058(4)
C008 0.039(4) 0.040(3) 0.029(3) 0.008(3) -0.003(3) -0.007(3)
C009 0.027(3) 0.032(3) 0.054(4) -0.012(3) -0.006(3) 0.001(2)
C00A 0.048(4) 0.036(4) 0.049(4) 0.015(3) -0.004(3) -0.018(3)
C00B 0.028(3) 0.035(3) 0.035(3) 0.001(3) 0.000(3) -0.006(3)
C00C 0.030(3) 0.025(3) 0.058(5) -0.001(3) -0.004(3) -0.002(2)
C00D 0.041(4) 0.041(4) 0.038(4) -0.010(3) -0.006(3) 0.000(3)
C00E 0.065(5) 0.022(3) 0.062(5) 0.004(3) -0.010(4) -0.001(3)
C00F 0.037(4) 0.063(5) 0.048(4) 0.006(4) 0.007(3) -0.005(4)
C00G 0.069(6) 0.071(6) 0.034(4) 0.003(4) -0.010(4) 0.009(5)
C00H 0.073(7) 0.047(5) 0.104(9) -0.006(5) -0.020(6) 0.030(5)
C00I 0.041(5) 0.113(10) 0.088(8) -0.047(8) 0.001(5) 0.016(5)
 
_geom_special_details
;
 All esds (except the esd in the dihedral angle between two l.s. planes)
 are estimated using the full covariance matrix.  The cell esds are taken
 into account individually in the estimation of esds in distances, angles
 and torsion angles; correlations between esds in cell parameters are only
 used when they are defined by crystal symmetry.  An approximate (isotropic)
 treatment of cell esds is used for estimating esds involving l.s. planes.
;
 
loop_
 _geom_bond_atom_site_label_1
 _geom_bond_atom_site_label_2
 _geom_bond_distance
 _geom_bond_site_symmetry_2
 _geom_bond_publ_flag
O001 C009 1.428(9) . ?
O001 H001 0.8200 . ?
O002 C005 1.239(9) . ?
O003 C004 1.442(9) . ?
O003 H003 0.8200 . ?
C004 C00D 1.478(11) . ?
C004 C008 1.498(11) . ?
C004 C00G 1.528(11) . ?
C005 C00B 1.466(9) . ?
C005 C006 1.474(9) . ?
C006 C00D 1.345(10) . ?
C006 C00E 1.498(9) . ?
O007 C00A 1.254(10) . ?
C008 C00F 1.520(12) . ?
C008 C00B 1.539(10) . ?
C008 H008 0.9800 . ?
C009 C00I 1.497(13) . ?
C009 C00C 1.529(11) . ?
C009 H009 0.9800 . ?
C00A C00B 1.470(11) . ?
C00A C00C 1.510(12) . ?
C00B C00F 1.546(10) . ?
C00C C00H 1.528(11) . ?
C00C H00C 0.9800 . ?
C00D H00D 0.9300 . ?
C00E H00A 0.9600 . ?
C00E H00B 0.9600 . ?
C00E H00E 0.9600 . ?
C00F H00F 0.9700 . ?
C00F H00G 0.9700 . ?
C00G H00H 0.9600 . ?
C00G H00I 0.9600 . ?
C00G H00J 0.9600 . ?
C00H H00K 0.9600 . ?
C00H H00L 0.9600 . ?
C00H H00M 0.9600 . ?
C00I H00N 0.9600 . ?
C00I H00O 0.9600 . ?
C00I H00P 0.9600 . ?
 
loop_
 _geom_angle_atom_site_label_1
 _geom_angle_atom_site_label_2
 _geom_angle_atom_site_label_3
 _geom_angle
 _geom_angle_site_symmetry_1
 _geom_angle_site_symmetry_3
 _geom_angle_publ_flag
C009 O001 H001 109.5 . . ?
C004 O003 H003 109.5 . . ?
O003 C004 C00D 109.0(7) . . ?
O003 C004 C008 107.7(6) . . ?
C00D C004 C008 113.4(6) . . ?
O003 C004 C00G 106.1(7) . . ?
C00D C004 C00G 110.3(7) . . ?
C008 C004 C00G 110.0(8) . . ?
O002 C005 C00B 120.4(6) . . ?
O002 C005 C006 119.9(6) . . ?
C00B C005 C006 119.7(6) . . ?
C00D C006 C005 119.4(6) . . ?
C00D C006 C00E 123.3(7) . . ?
C005 C006 C00E 117.2(6) . . ?
C004 C008 C00F 121.0(7) . . ?
C004 C008 C00B 119.0(6) . . ?
C00F C008 C00B 60.7(5) . . ?
C004 C008 H008 115.1 . . ?
C00F C008 H008 115.1 . . ?
C00B C008 H008 115.1 . . ?
O001 C009 C00I 110.4(9) . . ?
O001 C009 C00C 110.7(5) . . ?
C00I C009 C00C 111.3(7) . . ?
O001 C009 H009 108.1 . . ?
C00I C009 H009 108.1 . . ?
C00C C009 H009 108.1 . . ?
O007 C00A C00B 120.2(9) . . ?
O007 C00A C00C 120.1(8) . . ?
C00B C00A C00C 119.1(6) . . ?
C005 C00B C00A 118.1(6) . . ?
C005 C00B C008 117.1(6) . . ?
C00A C00B C008 115.5(6) . . ?
C005 C00B C00F 114.7(6) . . ?
C00A C00B C00F 119.1(6) . . ?
C008 C00B C00F 59.0(5) . . ?
C00A C00C C00H 107.4(8) . . ?
C00A C00C C009 111.6(6) . . ?
C00H C00C C009 113.0(7) . . ?
C00A C00C H00C 108.2 . . ?
C00H C00C H00C 108.2 . . ?
C009 C00C H00C 108.2 . . ?
C006 C00D C004 125.9(7) . . ?
C006 C00D H00D 117.0 . . ?
C004 C00D H00D 117.0 . . ?
C006 C00E H00A 109.5 . . ?
C006 C00E H00B 109.5 . . ?
H00A C00E H00B 109.5 . . ?
C006 C00E H00E 109.5 . . ?
H00A C00E H00E 109.5 . . ?
H00B C00E H00E 109.5 . . ?
C008 C00F C00B 60.3(5) . . ?
C008 C00F H00F 117.7 . . ?
C00B C00F H00F 117.7 . . ?
C008 C00F H00G 117.7 . . ?
C00B C00F H00G 117.7 . . ?
H00F C00F H00G 114.9 . . ?
C004 C00G H00H 109.5 . . ?
C004 C00G H00I 109.5 . . ?
H00H C00G H00I 109.5 . . ?
C004 C00G H00J 109.5 . . ?
H00H C00G H00J 109.5 . . ?
H00I C00G H00J 109.5 . . ?
C00C C00H H00K 109.5 . . ?
C00C C00H H00L 109.5 . . ?
H00K C00H H00L 109.5 . . ?
C00C C00H H00M 109.5 . . ?
H00K C00H H00M 109.5 . . ?
H00L C00H H00M 109.5 . . ?
C009 C00I H00N 109.5 . . ?
C009 C00I H00O 109.5 . . ?
H00N C00I H00O 109.5 . . ?
C009 C00I H00P 109.5 . . ?
H00N C00I H00P 109.5 . . ?
H00O C00I H00P 109.5 . . ?
 
_refine_diff_density_max    0.636
_refine_diff_density_min   -0.485
_refine_diff_density_rms    0.138

_shelx_res_file
;

    cu_20170418A_0m_a.res created by SHELXL-2014/7


TITL cu_20170418A_0m_a.res in P2(1)2(1)2(1)
REM Old TITL cu_20170418A_0m in P2(1)2(1)2(1)
REM SHELXT solution in P2(1)2(1)2(1)
REM R1 0.197, Rweak 0.073, Alpha 0.008, Orientation as input
REM Flack x = 0.272 ( 0.328 ) from Parsons' quotients
REM Formula found by SHELXT: C14 O4
CELL 1.54178 9.0317 10.0478 15.5635 90 90 90
ZERR 4 0.0005 0.0005 0.0008 0 0 0
LATT -1
SYMM 0.5-X,-Y,0.5+Z
SYMM -X,0.5+Y,0.5-Z
SYMM 0.5+X,0.5-Y,-Z
SFAC C H O
UNIT 56 80 16
LIST 6 ! automatically inserted. Change 6 to 4 for CHECKCIF!!

L.S. 10
PLAN  20
TEMP 23
BOND $H
LIST 6
FMAP 2
ACTA

WGHT    0.200000
FVAR       0.86490
O001  3    0.477238   -1.217188   -1.425603    11.00000    0.04419    0.05044 =
         0.04422   -0.01358   -0.01082    0.00748
AFIX 147
H001  2    0.435613   -1.284214   -1.443492    11.00000   -1.50000
AFIX   0
O002  3    0.373332   -1.421724   -1.533642    11.00000    0.06202    0.03494 =
         0.03354    0.00214   -0.00913   -0.00286
O003  3    0.047601   -1.272106   -1.751526    11.00000    0.04537    0.05195 =
         0.04905    0.00272   -0.00284    0.02295
AFIX 147
H003  2    0.034658   -1.272112   -1.699376    11.00000   -1.50000
AFIX   0
C004  1    0.184475   -1.339348   -1.771292    11.00000    0.03841    0.04260 =
         0.03066   -0.00266   -0.00386    0.01641
C005  1    0.335639   -1.402099   -1.609108    11.00000    0.02943    0.02454 =
         0.04030    0.00347   -0.00076    0.00252
C006  1    0.249116   -1.503837   -1.655362    11.00000    0.03548    0.02090 =
         0.03494    0.00262   -0.00524    0.00123
O007  3    0.521336   -1.087710   -1.622298    11.00000    0.07724    0.07620 =
         0.07285   -0.00342    0.01806   -0.05848
C008  1    0.308912   -1.252213   -1.741541    11.00000    0.03945    0.04018 =
         0.02893    0.00843   -0.00321   -0.00673
AFIX  13
H008  2    0.298937   -1.157810   -1.756270    11.00000   -1.20000
AFIX   0
C009  1    0.389812   -1.102838   -1.445573    11.00000    0.02725    0.03182 =
         0.05407   -0.01249   -0.00585    0.00060
AFIX  13
H009  2    0.456390   -1.026254   -1.450831    11.00000   -1.20000
AFIX   0
C00A  1    0.415757   -1.162303   -1.601774    11.00000    0.04830    0.03620 =
         0.04903    0.01471   -0.00430   -0.01795
C00B  1    0.381208   -1.280382   -1.653868    11.00000    0.02837    0.03490 =
         0.03498    0.00087    0.00049   -0.00565
C00C  1    0.310060   -1.121159   -1.531428    11.00000    0.03035    0.02480 =
         0.05794   -0.00127   -0.00413   -0.00156
AFIX  13
H00C  2    0.236037   -1.191669   -1.524533    11.00000   -1.20000
AFIX   0
C00D  1    0.183567   -1.471988   -1.730166    11.00000    0.04134    0.04054 =
         0.03838   -0.00951   -0.00615   -0.00020
AFIX  43
H00D  2    0.133065   -1.539543   -1.758621    11.00000   -1.20000
AFIX   0
C00E  1    0.234865   -1.637768   -1.613873    11.00000    0.06500    0.02225 =
         0.06165    0.00441   -0.01014   -0.00117
AFIX 137
H00A  2    0.182990   -1.696953   -1.651801    11.00000   -1.50000
H00B  2    0.180817   -1.629310   -1.561041    11.00000   -1.50000
H00E  2    0.331656   -1.672862   -1.602191    11.00000   -1.50000
AFIX   0
C00F  1    0.466940   -1.303893   -1.738488    11.00000    0.03721    0.06308 =
         0.04750    0.00601    0.00712   -0.00455
AFIX  23
H00F  2    0.545916   -1.242303   -1.752732    11.00000   -1.20000
H00G  2    0.484224   -1.395196   -1.756075    11.00000   -1.20000
AFIX   0
C00G  1    0.188780   -1.353456   -1.869025    11.00000    0.06900    0.07063 =
         0.03361    0.00318   -0.01025    0.00930
AFIX 137
H00H  2    0.277121   -1.399998   -1.885571    11.00000   -1.50000
H00I  2    0.188303   -1.266732   -1.894906    11.00000   -1.50000
H00J  2    0.103619   -1.402502   -1.887993    11.00000   -1.50000
AFIX   0
C00H  1    0.230821   -0.995286   -1.561719    11.00000    0.07286    0.04685 =
         0.10356   -0.00602   -0.02039    0.03026
AFIX 137
H00K  2    0.179687   -1.013314   -1.614528    11.00000   -1.50000
H00L  2    0.302093   -0.925823   -1.570826    11.00000   -1.50000
H00M  2    0.160889   -0.967627   -1.518835    11.00000   -1.50000
AFIX   0
C00I  1    0.282537   -1.074713   -1.374555    11.00000    0.04061    0.11314 =
         0.08780   -0.04693    0.00071    0.01642
AFIX 137
H00N  2    0.221247   -1.000481   -1.390143    11.00000   -1.50000
H00O  2    0.335987   -1.054040   -1.322936    11.00000   -1.50000
H00P  2    0.221574   -1.151577   -1.365036    11.00000   -1.50000

AFIX   0
HKLF 4

REM  cu_20170418A_0m_a.res in P2(1)2(1)2(1)
REM R1 =  0.1282 for    2021 Fo > 4sig(Fo)  and  0.1508 for all    2768 data
REM    169 parameters refined using      0 restraints

END

WGHT      0.2000      0.0000

REM Highest difference peak  0.636,  deepest hole -0.485,  1-sigma level  0.138
Q1    1   0.3982 -1.3608 -1.4168  11.00000  0.05    0.64
Q2    1   0.2416 -1.7737 -1.5805  11.00000  0.05    0.57
Q3    1   0.2689 -0.8520 -1.5843  11.00000  0.05    0.56
Q4    1   0.1857 -0.8511 -1.5776  11.00000  0.05    0.54
Q5    1   0.3000 -1.2371 -1.8701  11.00000  0.05    0.46
Q6    1   0.4118 -1.2704 -1.5314  11.00000  0.05    0.42
Q7    1   0.2626 -1.5250 -1.5996  11.00000  0.05    0.40
Q8    1   0.3960 -1.1341 -1.7236  11.00000  0.05    0.39
Q9    1   0.3346 -1.2789 -1.5364  11.00000  0.05    0.39
Q10   1   0.2001 -1.3656 -1.6397  11.00000  0.05    0.39
Q11   1   0.2182 -1.6119 -1.7421  11.00000  0.05    0.38
Q12   1   0.5036 -0.9466 -1.6184  11.00000  0.05    0.38
Q13   1   0.3521 -1.3863 -1.6448  11.00000  0.05    0.38
Q14   1   0.1673 -1.1757 -1.7613  11.00000  0.05    0.37
Q15   1   0.1441 -1.4806 -1.7733  11.00000  0.05    0.37
Q16   1   0.2174 -1.3570 -1.7219  11.00000  0.05    0.34
Q17   1   0.0975 -1.1399 -1.7568  11.00000  0.05    0.34
Q18   1   0.1998 -1.4395 -1.7653  11.00000  0.05    0.33
Q19   1   0.2457 -1.1126 -1.7523  11.00000  0.05    0.32
Q20   1   0.1109 -1.7479 -1.5147  11.00000  0.05    0.32
;
_shelx_res_checksum   86892

_shelx_hkl_file
;
   1   0   0  -12.50   20.30
  -1   0   0   -5.50    0.90
  -1   0   0    2.10   24.30
  -1   0   0   -4.80    3.50
  -2   0   0 3812.32  561.54
  -2   0   0 3675.93  584.14
  -2   0   0 4066.79  563.94
  -3   0   0  148.49  113.19
   3   0   0  -74.99   82.79
  -3   0   0    3.00   12.20
  -4   0   0  866.91  138.19
  -4   0   0 1042.50  290.57
  -4   0   0  927.71  132.79
  -4   0   0  899.01  132.29
  -5   0   0    5.20   11.80
  -5   0   0    0.50   31.00
  -6   0   0  154.48   33.90
  -6   0   0   93.29   24.80
   7   0   0    5.10   12.40
   7   0   0  -16.00   16.50
   7   0   0    0.10   17.50
   8   0   0   19.20   12.60
   8   0   0   37.20   16.90
   8   0   0   19.20   13.80
   9   0   0    2.10   12.30
   9   0   0    0.40   10.50
   9   0   0  -18.80   13.40
  10   0   0   70.39   17.10
  11   0   0   -6.50   11.30
   0  -1   0    1.20    0.60
   0   1   0   -0.40    1.20
   0   1   0   -2.80    3.70
   0  -1   0   -1.20    3.10
   1  -1   0  982.90  148.39
   1   1   0 1092.49  146.89
  -1  -1   0  936.41  146.99
  -2  -1   0 4178.88  631.64
   2  -1   0 4049.89  595.24
   2  -1   0 4249.38  614.54
  -2  -1   0 4172.78  592.94
  -2  -1   0 3885.31  593.34
  -3  -1   0   43.80    9.10
  -3   1   0  111.09  103.49
  -3  -1   0  -38.40  138.79
   3  -1   0   38.80   15.90
   3  -1   0   10.10   85.79
  -3   1   0   11.70   17.30
  -3  -1   0   35.70    7.30
  -3   1   0   35.80    8.00
  -4  -1   0   13.80    7.70
   4  -1   0   15.80  139.49
  -4  -1   0  190.68  275.97
  -4   1   0   13.40    7.10
  -4   1   0   21.80   26.50
  -4  -1   0   13.40    5.60
  -4  -1   0   21.40   24.30
  -5  -1   0   66.89   19.40
  -5   1   0   54.39   15.10
  -5   1   0   59.99   43.80
  -5  -1   0   51.39   12.60
   5  -1   0   52.09  254.87
  -5   1   0   60.49   16.40
  -5  -1   0  101.39   38.30
   6  -1   0  106.09   25.50
   6  -1   0   89.09   22.00
  -6   1   0   62.79   28.50
   6   1   0   91.09   27.00
   7   1   0   81.09   24.90
   7   1   0  101.59   25.10
   7  -1   0   64.89   20.30
   7   1   0   68.69   16.20
   7   1   0  109.49   22.30
   7   1   0   76.99   20.80
   8   1   0  -17.00   18.10
   8   1   0    4.70   12.80
   8   1   0    6.70    7.20
   8  -1   0    8.30   13.10
   8   1   0   14.60   12.90
   8  -1   0    2.90   12.90
   9  -1   0   60.59   15.10
   9  -1   0   29.60   12.60
   9   1   0   43.50   13.60
   9   1   0   59.59   14.40
   9  -1   0   35.40   14.00
  10   1   0   23.90   11.00
  10  -1   0   44.70   11.90
  10  -1   0    9.50   10.90
  10   1   0   44.30   10.20
  11  -1   0   15.70   10.30
   0   2   0  242.88   40.60
   0   2   0  310.37   40.50
   1   2   0 1055.79  157.28
   1  -2   0 1108.09  160.58
   2   2   0 4461.95  638.24
   2  -2   0 4335.97  641.54
   3  -2   0   -9.10   15.60
  -3  -2   0  263.97  185.68
   3  -2   0    3.00  106.09
  -3  -2   0   12.80    7.80
  -3   2   0   20.10    5.70
  -3  -2   0    8.20    4.50
  -3   2   0   22.60   23.30
   4  -2   0  160.88  180.68
  -4  -2   0    2.00   10.50
   4  -2   0    6.20   26.40
  -4   2   0  -15.00   34.20
  -4   2   0   14.60    8.70
   5  -2   0  499.35  326.57
  -5   2   0  461.65   73.79
  -5  -2   0  511.35  106.39
   6  -2   0   44.20   15.40
   6   2   0   50.79   13.60
   6  -2   0   49.40   17.20
   6  -2   0   60.19   22.80
   6   2   0   35.30   16.40
   6   2   0   34.70   10.20
   7  -2   0  156.68   31.20
   7   2   0  158.88   27.80
   7  -2   0  114.99   27.20
   7   2   0  166.58   26.90
   7  -2   0  167.88   29.10
   7   2   0  115.59   22.80
   7   2   0  115.59   26.90
   8   2   0   64.89   16.40
   8   2   0   98.19   22.40
   8  -2   0   73.49   18.10
   8   2   0   42.60   15.90
   8   2   0   80.59   15.10
   8  -2   0   79.19   17.10
   8  -2   0   49.00   15.60
   9  -2   0    6.00   11.70
   9  -2   0   14.00   11.50
   9  -2   0    7.30   11.20
   9   2   0  -13.50   12.80
   9   2   0   -6.10   23.60
   9   2   0    0.60   11.00
  10   2   0   17.60    9.50
   0   3   0   -2.00    3.30
   0  -3   0   -4.90   20.70
   0   3   0   -0.80    1.60
   0  -3   0    6.70    8.10
   0  -3   0    0.90    2.70
   1   3   0  448.16   67.19
   1  -3   0  394.46   75.39
   1  -3   0  487.65   67.19
  -1   3   0  456.85   66.69
   2  -3   0  637.14  110.49
   2   3   0  798.22  104.89
  -2   3   0  679.23  105.49
   3  -3   0   18.60   28.90
  -3   3   0   43.80   10.20
  -3   3   0   22.10   23.90
   3  -3   0   30.20    8.60
   3  -3   0  179.58  151.38
   3   3   0   38.60    8.90
  -3   3   0    4.50   31.70
   4  -3   0 -261.77  230.88
  -4  -3   0   24.60   13.00
  -4   3   0   27.10   50.29
   5  -3   0  313.57  435.86
   6   3   0  128.19   20.60
   6   3   0   84.79   21.90
   6  -3   0  106.69   28.40
   6   3   0   98.19   19.60
   6  -3   0  113.69   27.10
   6  -3   0  164.48   25.70
   7   3   0  117.99   20.80
   7  -3   0  117.29   25.20
   7  -3   0  121.69   27.40
   8   3   0   33.60   15.90
   8  -3   0   32.90   14.10
   8  -3   0   51.69   15.60
   8   3   0   56.69    9.70
   8  -3   0   26.20   12.60
   8   3   0   58.59   13.60
   9  -3   0   17.60   22.90
   9  -3   0   22.50    9.50
   9   3   0    3.00   19.80
   9   3   0    3.70    9.40
   9   3   0   32.10   10.00
   9  -3   0    6.30   11.80
  10  -3   0  -11.60    7.10
  10   3   0   -5.90    9.20
  10  -3   0    4.00    8.00
  10   3   0    1.80    8.40
   0   4   0    0.40    4.40
   0   4   0    0.50    8.70
   0   4   0    0.50    2.50
   0  -4   0    3.70    9.10
   1   4   0   79.99   17.10
  -1  -4   0   33.30   43.80
   1   4   0   66.69   13.00
  -1   4   0   84.09   13.10
   1  -4   0   69.59   16.60
  -1  -4   0  105.69   18.30
  -1   4   0   61.69   27.20
   1  -4   0   60.79   32.50
  -2   4   0  181.38   32.90
   2   4   0  208.68   31.60
   2  -4   0  436.96  216.88
  -2   4   0  192.88   29.90
  -2  -4   0  138.09   35.50
   3   4   0   88.09   19.40
  -3   4   0   26.90   48.80
  -3   4   0   98.29   25.60
   3  -4   0  245.48  251.47
  -3   4   0   77.89   17.40
   3  -4   0   84.09   18.40
   4  -4   0 1084.29  399.26
  -4   4   0  435.16   69.99
   5   4   0    2.50    6.50
   5  -4   0    6.60   15.80
   5   4   0    8.50    7.20
   5  -4   0   15.20   16.80
   5   4   0    0.30   13.80
   5   4   0    6.20    9.70
   6   4   0   55.09   10.10
   6   4   0   30.70   15.40
   6  -4   0   66.89   18.30
   6   4   0   37.90   11.10
   6   4   0   49.60   12.40
   6  -4   0   67.89   20.90
   6  -4   0   44.40   18.40
   7  -4   0    9.70   14.30
   7   4   0   -3.90    9.60
   7  -4   0    4.90   12.10
   7   4   0   -0.50    6.10
   7  -4   0  -16.20   15.30
   7   4   0    2.00   13.40
   8  -4   0    7.70   13.10
   8   4   0   15.20   10.40
   8  -4   0    6.50   12.00
   8  -4   0   17.30   11.70
   8   4   0   15.20   12.90
   8   4   0    3.90    5.90
   9  -4   0   22.50   11.10
   9  -4   0   43.60   12.00
   9   4   0   40.90   11.20
  10  -4   0    1.80    7.00
  10  -4   0   24.10    9.50
  10   4   0   15.60    6.00
  10   4   0   31.00   11.80
   0   5   0   -7.00    4.20
   0  -5   0   -8.20   10.80
   0   5   0   -9.10   15.50
   0   5   0   10.30    5.20
  -1   5   0   51.09    9.50
   1  -5   0   29.00   11.60
   1   5   0   58.49   16.70
  -1  -5   0   65.79   17.40
   1   5   0   32.90    8.60
  -2   5   0  122.79   22.70
   2   5   0  113.09   28.90
   2  -5   0  264.37  263.27
  -2   5   0  129.29   25.60
  -2  -5   0  111.29   28.20
  -3   5   0   13.20   14.60
   3  -5   0    8.90  386.86
  -3   5   0   44.10   78.19
  -3   5   0  -12.20   19.70
   4   5   0  281.47   42.30
   4   5   0  259.47   43.60
   4   5   0  267.47   42.60
   4   5   0  318.77   43.70
  -4   5   0  199.78  124.19
   5  -5   0   14.10   18.10
   5   5   0   12.90    7.40
   5  -5   0    7.20   15.30
   5   5   0   16.30    9.20
   5   5   0    7.10    6.40
   5   5   0   23.20   13.40
   6   5   0   13.00   13.00
   6   5   0   19.20    6.30
   6   5   0   17.10    8.90
   6  -5   0   11.70   18.30
   6  -5   0   12.80   17.00
   7   5   0   45.10    8.20
   7  -5   0   15.10   14.40
   7   5   0   32.20   10.10
   7   5   0   29.30   14.30
   7  -5   0   22.00   15.90
   7  -5   0   38.00   17.50
   8   5   0   -0.10    8.50
   8  -5   0    7.20   16.20
   8  -5   0   14.60   13.40
   8  -5   0   -1.80   16.30
   8   5   0    8.30    5.50
   8   5   0   12.50   12.60
   9  -5   0    3.90    8.40
   9   5   0   13.80    4.80
   9   5   0    7.10    7.00
   9  -5   0   13.00   11.50
   9   5   0   18.40    9.30
  10   5   0  -18.60   12.80
  10  -5   0   -0.50    9.90
  10  -5   0   -4.50    7.30
  10   5   0    3.90    3.00
   0  -6   0  141.29   25.90
   0   6   0   99.69   21.10
   1  -6   0   10.10   11.50
  -1   6   0   17.90    9.30
  -1  -6   0   -4.30   17.70
   1   6   0    6.20    5.30
  -1   6   0    6.10    9.60
  -2  -6   0  369.36   72.19
  -2   6   0  457.05   67.79
   2  -6   0  694.53  418.66
   3   6   0  335.87   48.90
  -3   6   0  243.48   57.49
   3   6   0  321.77   49.40
   3   6   0  349.77   48.90
   3   6   0  322.97   49.70
   4   6   0  274.87   42.30
  -4   6   0  280.87   54.89
   4  -6   0  262.17   56.79
   4   6   0  292.07   42.80
   4   6   0  293.67   43.40
   4   6   0  274.17   44.10
   6   6   0  124.09   22.50
   6  -6   0   95.09   27.40
   6   6   0  145.69   21.50
   6  -6   0  174.18   31.70
   6   6   0  138.59   23.00
   7  -6   0    5.10   13.80
   7  -6   0   -6.50   16.40
   7   6   0    8.50    8.20
   7  -6   0   -3.40   16.60
   7   6   0    9.30    5.20
   7   6   0   15.60   12.10
   8  -6   0    4.90   13.70
   8   6   0   10.20    5.30
   8   6   0   -8.30    8.40
   8  -6   0   -1.20   14.80
   8   6   0   11.00    7.50
   9   6   0   11.60    6.10
   9  -6   0    9.00   11.10
   9  -6   0    0.80    8.80
   9   6   0    2.90    3.00
   9   6   0    0.60    8.00
   0   7   0   10.20    8.20
   0  -7   0   16.20   19.30
   0  -7   0   34.80   19.70
  -1   7   0    3.50    7.40
  -1   7   0    4.50   26.90
   1   7   0   11.40    7.00
   1  -7   0  -21.40   29.60
   1  -7   0    2.80   21.80
   1   7   0   -1.40   11.30
  -1  -7   0   -3.70   21.60
   1   7   0   -5.00   10.80
  -1  -7   0  -10.20   21.40
   1   7   0    3.20   12.80
  -2   7   0  411.46   59.29
   2   7   0  385.56   59.49
   2   7   0  440.06   58.59
  -2  -7   0  477.05   70.89
  -2   7   0  322.97   65.89
   2  -7   0  348.27   83.59
   2   7   0  346.37   59.59
   3   7   0  771.72   98.59
   3   7   0  655.53   99.19
  -3   7   0  660.93   99.29
   3   7   0  626.74   99.09
   3   7   0  679.23   98.59
  -3   7   0  605.74  106.89
   4   7   0  852.51  127.39
  -4   7   0  733.23  136.09
   4   7   0  958.30  127.29
   5   7   0   42.10    8.90
   5   7   0   35.50    9.50
   5  -7   0   54.89   26.30
   5   7   0   64.39   12.20
   6   7   0    1.80    6.30
   6   7   0   10.00    5.20
   6   7   0   20.80   12.20
   6  -7   0  -11.30   16.10
   6  -7   0    6.10   22.70
   6   7   0   13.20    9.10
   7  -7   0    3.50   14.80
   7   7   0   -5.90   16.40
   7  -7   0  -19.40   20.60
   7   7   0   -3.50    5.80
   7   7   0    5.40    8.60
   8   7   0    6.30    7.40
   8   7   0    2.30    5.40
   8  -7   0    2.70   10.10
   8  -7   0   13.90   16.70
   8   7   0   10.70    3.50
   9  -7   0   -1.20    8.10
   9  -7   0   18.60   13.80
   9   7   0    1.30    2.70
   9   7   0   -6.70    6.90
   9   7   0   -1.50    4.40
   0   8   0  345.57   47.00
   0  -8   0  260.67   54.09
   0   8   0  310.37   49.30
  -1   8   0    6.40    7.70
  -1  -8   0   -6.00   20.50
  -1  -8   0  -11.70   30.00
   1   8   0    7.30    9.80
   1  -8   0  -14.20   21.10
   1   8   0   -8.90   13.40
   1   8   0   12.10   11.70
   1  -8   0   -2.00   17.70
   1   8   0   17.50    9.20
  -1   8   0    3.10   14.30
  -2   8   0  465.25   78.79
  -2  -8   0  490.05   79.99
   2   8   0  496.05   71.79
  -3   8   0  765.72  118.69
  -3  -8   0  926.31  126.19
   3   8   0  728.63  119.09
   3   8   0  853.61  118.39
  -4  -8   0   17.30   24.80
   4   8   0   27.00    7.40
  -4   8   0   -0.40   32.50
   4   8   0   21.90    7.40
   4   8   0   19.50    9.00
   5   8   0   10.50    6.30
   5   8   0   14.60    6.40
  -5  -8   0   24.30   23.50
   5   8   0   33.40   12.30
   5   8   0   21.80    8.60
  -5   8   0   29.90   44.70
   6  -8   0   20.20   18.30
   6   8   0   43.10   12.40
   6   8   0   18.10    7.70
   6   8   0   22.40    9.30
  -6  -8   0   37.70   22.90
   6   8   0   18.00    8.70
  -7  -8   0   16.80   17.80
   7  -8   0   15.20    9.90
   7   8   0   16.50    5.60
   7   8   0   11.80    7.10
   8  -8   0    8.50    8.30
   8   8   0   11.10    3.40
   8   8   0   16.70    5.60
   8   8   0    7.60    4.40
   0   9   0    9.90    6.30
   0   9   0    3.50   13.60
   0  -9   0    9.20   23.80
   0  -9   0   -0.90   18.30
  -1   9   0   25.00   19.00
  -1  -9   0    3.20   18.20
   1   9   0   13.00   16.50
   1   9   0   11.60   15.30
   1   9   0   -1.50    5.90
  -1  -9   0   31.60   34.30
  -1   9   0   -0.40    6.50
   1  -9   0   16.30   22.60
  -2  -9   0   49.80   55.19
  -2   9   0  122.29   20.60
  -2   9   0   66.99   28.50
   2   9   0  121.89   18.60
  -2  -9   0  113.59   30.20
   2   9   0  115.39   25.70
   3   9   0   38.00    7.80
   3   9   0   22.40   11.50
  -3   9   0   38.10    9.80
   3  -9   0  -98.79   67.39
  -3  -9   0   18.00   21.30
  -3   9   0   10.40   26.80
   4   9   0   -0.80    5.30
   4   9   0    8.60    9.50
  -4  -9   0  -18.70   20.40
   4   9   0   -5.30    7.40
   4   9   0    8.40    9.60
  -4   9   0  -29.00   27.90
  -5   9   0  -11.10   33.40
   5  -9   0   17.20   14.40
   5   9   0   18.50    9.90
   5   9   0   25.30    7.00
   5   9   0   35.40   12.10
  -5  -9   0   27.80   21.80
   6  -9   0    8.80    8.90
   6   9   0    8.10    4.50
  -6  -9   0    0.90   13.60
   6   9   0   13.60    3.80
   6   9   0   20.30    6.90
   6   9   0    0.50    5.50
   7   9   0    9.70    3.00
   7  -9   0  -13.30    7.40
   7   9   0    1.30    4.00
  -7  -9   0   -3.00   12.20
   7   9   0    7.20    5.20
   0 -10   0   42.20   20.00
   0  10   0   47.90   22.20
   1 -10   0    8.00   27.20
  -1  10   0   -2.80   25.20
  -1  10   0   28.90    7.60
  -1 -10   0    9.70   18.60
   2 -10   0  -14.30   32.40
   2  10   0    4.00    4.90
  -2 -10   0  -13.40   19.00
  -2  10   0   -1.90   12.10
  -2  10   0  -31.30   24.90
  -2 -10   0  172.78   59.29
  -3  10   0  -41.40   25.70
   3  10   0   -1.00   10.50
   3  10   0   -7.00   10.00
  -3 -10   0  -13.10   24.00
   4  10   0   21.20    7.30
   4  10   0    5.00    4.20
   4  10   0   -5.40    8.00
  -4 -10   0   -7.40   14.70
   4 -10   0    1.70   12.10
   5  10   0   13.40    3.80
   5  10   0   -2.30    8.90
  -5 -10   0    0.60   12.60
   5  10   0   11.10    5.80
   5 -10   0   11.10    8.10
   5  10   0    3.50    5.10
  -6 -10   0    7.60   11.90
   6 -10   0   14.60    7.80
   6  10   0    3.50    5.00
   6  10   0    5.50    4.00
   6  10   0    0.70    4.10
   0  11   0   -1.60    5.00
  -1  11   0    4.70    5.70
   1  11   0    9.80    4.90
  -1 -11   0    9.50   17.20
   2  11   0    1.30    4.00
  -2  11   0    9.80    6.70
   3  11   0   -1.20    3.40
  -3 -11   0   -6.30   11.70
   3  11   0    5.70    5.10
   4 -11   0    6.50   16.10
   4  11   0    3.30    2.90
   4  11   0    7.80    4.50
  -4 -11   0    2.40   11.80
   5  11   0    3.10    4.50
  -5 -11   0    2.60   13.30
   0  12   0   18.40    5.30
  -1  12   0    5.70   11.80
   1  12   0    6.60    4.60
   2  12   0    9.40    4.90
   2  12   0    5.60    4.80
   0   0   1    2.00    0.80
   0   0  -1    0.10    0.80
   0   0  -1    0.50    0.80
  -1   0  -1   77.59   24.40
  -1   0   1   39.80    6.70
  -1   0   1   47.50   38.30
   1   0  -1   43.60    6.60
   1   0  -1   10.20   36.90
   1   0   1   41.80   21.40
  -1   0   1   46.60    7.30
   2   0  -1 8583.14 1345.97
  -2   0   1 9676.53 1327.37
   2   0   1 8323.47 1340.57
  -2   0   1 9896.71 1327.77
  -3   0   1  376.06   63.09
   3   0   1  335.57  111.89
  -3   0   1  576.04  171.08
   3   0  -1  290.17  120.69
  -3   0   1  373.86   59.79
  -3   0  -1  448.86   59.49
  -3   0   1  403.16   59.49
  -3   0  -1  600.14  132.59
  -4   0  -1    9.90   24.60
  -4   0  -1   17.30  197.88
  -4   0  -1   14.80    6.00
  -4   0   1 -298.27  359.46
  -4   0   1   15.30    6.50
  -4   0   1   -6.40   18.00
  -5   0  -1  278.27   42.40
  -5   0   1  246.78   43.40
  -5   0  -1  262.17   71.39
  -5   0   1  272.07   44.40
   6   0  -1   83.99   24.00
  -6   0   1   50.99   28.10
   6   0   1  100.99   20.30
  -6   0  -1   67.89   29.90
   6   0  -1  111.39   26.20
   7   0   1  145.39   29.90
   7   0   1  105.59   27.90
   7   0  -1  147.99   29.00
   7   0  -1  155.38   30.20
   7   0   1  187.88   29.90
   7   0  -1  149.69   30.60
   8   0   1    3.30   11.10
   8   0  -1   20.40   13.10
   8   0   1    5.30   14.20
   8   0  -1   11.30   12.40
   8   0  -1    2.00   16.70
   8   0   1  -10.60   10.60
   9   0  -1  -14.00   24.30
   9   0  -1    8.40   12.80
   9   0   1    4.80   12.00
   9   0   1   29.80   13.40
   9   0   1   -0.40    9.50
   9   0  -1    5.50   10.10
  10   0   1   11.90    9.40
  10   0  -1    2.30   10.10
  10   0   1   -9.80    9.40
  10   0  -1   -2.40    7.50
  11   0   1   15.70   18.60
  11   0  -1   -8.70    9.60
   0   1  -1 2132.89  347.67
   0   1  -1 2664.63  349.87
  -1   1   1 3268.97  535.45
   1  -1  -1 3847.72  535.55
  -1   1  -1 3971.50  538.45
  -2  -1  -1 2403.66  319.97
  -2  -1  -1 2404.16  359.46
   2  -1   1 2534.65  344.57
  -2   1   1 2125.69  319.97
   2  -1   1 2477.25  323.57
   2  -1  -1 2390.26  349.77
   2  -1  -1 2037.00  321.37
  -2   1  -1 2167.28  323.87
   2  -1  -1 1932.51  319.97
  -2  -1   1 2003.30  319.67
  -2  -1   1 2088.99  320.37
  -2  -1   1 2424.36  376.96
   3  -1   1 1421.06  276.47
  -3  -1  -1 1544.05  302.97
  -3  -1  -1 1559.14  235.18
  -3  -1  -1 1727.73  234.78
   3  -1   1 1828.52  240.28
  -3   1   1 1601.84  235.28
   3  -1  -1 1760.02  237.98
  -3  -1   1 2114.89  362.26
  -3   1  -1 1355.76  239.88
  -3  -1   1 1460.45  234.68
  -3  -1   1 1494.05  235.58
   3  -1  -1 1462.65  289.37
  -3   1  -1 1824.72  235.38
  -4  -1  -1  338.47   51.99
   4  -1   1  239.68  143.09
  -4  -1  -1  334.37   50.89
  -4  -1  -1  538.05  230.38
  -4   1   1  361.26   52.09
  -4   1   1  332.47   51.89
  -4   1  -1  391.56   51.79
  -4  -1   1  402.76   59.59
   4  -1  -1  278.37  182.18
  -4  -1   1  307.37   50.89
  -4  -1   1  320.17   52.69
  -4   1  -1  494.85  228.98
  -4   1  -1  290.87   66.79
  -5  -1  -1   90.79   18.30
  -5   1   1   24.40   48.50
   5  -1   1  148.49  242.58
  -5   1   1  109.69   22.10
  -5   1   1   97.59   19.40
  -5  -1  -1  146.19   48.30
  -5  -1  -1   93.99   20.60
  -5   1  -1   87.49   18.60
  -5  -1   1   41.40   31.00
  -5   1  -1  113.39   21.80
   5  -1  -1 -191.28  253.07
  -5  -1   1   83.49   21.50
  -5   1  -1   73.59   46.40
  -5  -1   1   72.09   16.50
  -6   1   1   33.10   22.40
   6  -1   1   97.29   21.20
   6  -1   1  110.29   26.10
   6   1  -1   67.89   20.20
   6   1  -1   74.09   18.50
   6  -1  -1   63.29   16.70
  -6   1  -1   12.30   21.20
  -6   1  -1   41.50   26.60
   6  -1  -1   73.19   24.70
  -6  -1   1   40.90   32.60
   7  -1   1  386.16   52.79
   7  -1   1  266.27   53.39
   7  -1   1  341.67   51.49
   7   1  -1  250.27   53.79
   7   1   1  363.46   51.39
   7   1   1  353.36   54.69
   7   1   1  263.47   48.40
   7  -1  -1  364.16   56.89
   7  -1  -1  383.16   52.09
   7   1   1  302.57   51.29
   7  -1  -1  345.77   52.29
   7   1   1  258.77   52.99
   8  -1   1   11.10   13.70
   8  -1   1   18.70   12.90
   8   1  -1   -1.00    7.80
   8  -1   1   12.80   12.30
   8   1  -1   13.40   13.90
   8   1  -1   31.30   13.90
   8  -1  -1   23.00   15.00
   8  -1  -1   27.50   13.10
   8   1   1   19.20   11.60
   8   1   1    8.80    8.00
   8   1   1   17.50   13.80
   8  -1  -1   26.70   15.80
   8   1   1  -11.70   12.40
   8   1   1   19.50   16.90
   9  -1   1   33.40   12.90
   9   1  -1   31.50   14.50
   9  -1   1   41.90   14.20
   9  -1   1   45.20   14.10
   9   1   1    3.90   15.80
   9  -1  -1   49.40   15.40
   9   1   1   52.79   13.80
   9  -1  -1   23.00   13.10
   9  -1  -1   63.39   15.40
   9   1   1   37.10   12.90
  10  -1   1    5.40    8.60
  10   1  -1   31.70    9.10
  10  -1  -1   19.80    9.60
  10  -1  -1   28.10    8.30
  11  -1   1    3.00   10.40
  11  -1  -1   -9.20    8.90
   0  -2   1 2418.96  338.87
   0   2   1 2242.08  338.27
   1   2  -1  941.31  135.09
  -1  -2  -1 1081.39  134.29
   1  -2  -1  853.31  138.89
  -1   2  -1  899.11  138.79
   1  -2  -1  904.41  134.69
   1   2   1  847.62  134.39
  -2  -2  -1  124.49   21.90
   2  -2   1  129.69   22.10
  -2   2  -1  169.28   35.80
  -2  -2   1  101.19   30.30
  -2  -2   1  154.18   23.80
   2  -2  -1  173.38   28.60
   2  -2  -1  167.18   23.30
   3  -2   1 2154.58  323.47
  -3   2   1 2247.58  318.57
   3  -2   1 2255.97  370.86
  -3  -2  -1 1864.31  409.76
   3  -2  -1 2076.79  321.87
   3  -2  -1 2486.05  389.56
  -3  -2   1 2491.85  443.16
  -4  -2  -1  135.09   18.10
   4  -2   1  126.09  179.98
  -4  -2  -1   93.99   21.60
  -4   2   1   53.79   40.90
   4  -2   1  124.39   40.90
  -4  -2  -1  426.76  338.97
  -4  -2   1   99.39   17.90
   4  -2  -1  -17.40  200.98
  -4   2  -1   94.89   40.00
  -4  -2   1  119.09   23.30
  -5   2   1  113.09   68.99
  -5  -2  -1   83.49   24.90
   5  -2   1   49.90  287.07
  -5   2   1  139.99   25.60
  -5   2   1  139.09   25.70
  -5   2  -1   48.40   56.89
  -5   2  -1  138.79   27.30
   5  -2  -1 -147.09  331.07
  -5  -2   1  109.89   27.80
   6   2  -1  314.67   61.29
   6   2  -1  357.46   61.49
   6  -2   1  443.36   63.69
   6   2  -1  389.86   58.59
   6   2  -1  438.26   62.69
   6  -2   1  396.96   61.99
   6  -2  -1  433.16   62.49
   6  -2  -1  393.86   61.99
   6   2   1  360.76   59.89
   6  -2  -1  424.96   66.69
   6   2   1  401.76   58.79
   7   2  -1   20.10   14.80
   7   2  -1   20.10    7.50
   7  -2   1   35.30   16.50
   7  -2   1   17.40   13.30
   7   2  -1    3.70   13.00
   7   2  -1   28.90   13.00
   7  -2   1   24.80   15.70
   7  -2  -1    6.10   15.40
   7   2   1    3.20   21.40
   7   2   1   18.50    7.80
   7  -2  -1   23.60   17.90
   7   2   1   26.50   13.80
   7   2   1   22.30   12.20
   7   2   1   10.80   14.30
   7  -2  -1    3.80   14.90
   8  -2   1   20.30   13.40
   8  -2   1   33.60   13.70
   8   2  -1   26.90   12.30
   8  -2   1   18.70   12.10
   8   2  -1   32.50    8.30
   8   2  -1   13.80   13.50
   8   2   1   32.50   12.40
   8   2   1    2.20    7.30
   8  -2  -1   21.60   11.80
   8  -2  -1   35.30   14.10
   8   2   1   11.20   19.60
   8  -2  -1   43.10   16.10
   8   2   1   23.10   13.80
   8   2   1    6.80   13.10
   9  -2   1   53.59   14.90
   9   2  -1   60.09   15.70
   9  -2   1   25.90   13.70
   9   2   1   92.79   18.10
   9  -2  -1   71.39   17.00
   9   2   1   56.39   17.00
   9  -2  -1   46.60   15.00
   9   2   1   29.90   19.60
  10  -2   1   -1.00    8.70
  10   2  -1    9.40    8.80
  10  -2   1   14.70    8.30
  10   2  -1   -0.20   11.40
  10  -2  -1   21.90    8.70
  10  -2  -1    1.50    8.30
  10  -2  -1   -4.40   10.20
   0  -3  -1 1308.67  194.08
   0   3   1 1143.19  193.28
   0   3   1 1480.25  193.38
   0  -3   1 1391.46  193.68
   1   3  -1  642.54   88.69
   1  -3   1  562.94   93.19
  -1   3   1  662.93   87.49
   1   3  -1  563.34   87.09
   1   3   1  545.85   87.49
  -1   3  -1  655.93   88.09
  -1  -3   1  659.53   88.09
   1   3   1  565.94   87.89
   1  -3  -1  524.25   87.99
  -2   3   1   89.79   14.80
  -2  -3  -1   76.99   13.30
  -2   3   1  115.79   18.40
   2  -3   1   90.79   27.50
   2  -3   1  232.28  122.59
  -2  -3   1   39.80   32.70
   2  -3  -1   64.39   28.70
   2  -3  -1  102.59   15.80
   2  -3  -1  104.89  125.79
   2   3   1   90.79   14.00
  -2   3  -1   96.19   19.10
  -2   3  -1   61.19   30.30
  -3  -3  -1   72.09   10.80
  -3   3   1   28.90   32.10
   3  -3   1  134.19  149.69
   3  -3   1   76.89   13.50
   3  -3   1  123.09   34.50
   3  -3  -1   61.69  179.88
   3  -3  -1  118.99   33.40
  -3   3  -1   97.79   26.40
  -3  -3   1   68.09   45.50
   3  -3  -1   56.29   12.50
  -3   3  -1   79.59   37.50
  -3  -3   1   42.60   15.20
  -4   3   1  640.94   95.09
   4  -3   1  774.32  253.37
   4  -3  -1  533.25  116.39
   4  -3  -1 1224.48  336.67
  -4   3  -1  638.24   94.19
   5  -3   1  455.25  382.06
  -5   3   1  323.87   52.29
   5  -3  -1  287.27  457.35
  -5   3  -1  243.78   48.00
   6   3  -1   89.79   17.00
   6   3  -1   80.29   20.30
   6  -3   1  112.19   22.30
   6  -3   1   80.39   23.20
   6  -3   1  121.49   21.70
   6   3  -1  102.69   18.60
   6   3   1   71.59   21.10
   6  -3  -1  133.59   23.50
   6  -3  -1  125.49   25.30
   6   3   1   90.59   19.60
   6  -3  -1   80.69   20.30
   6   3   1   83.09   16.90
   7  -3   1   49.00   15.70
   7   3  -1   28.90   13.90
   7   3  -1   34.00   14.10
   7  -3   1   26.60   14.80
   7   3  -1   27.80    8.70
   7   3   1   47.90    9.70
   7  -3  -1   59.69   17.20
   7   3   1   43.60   13.90
   7  -3  -1   22.90   27.50
   7  -3  -1   43.00   14.60
   8   3  -1   32.40    8.10
   8  -3   1   22.20   14.60
   8  -3   1   30.80   12.80
   8   3  -1   50.99   15.60
   8   3  -1   15.40   12.40
   8  -3   1   12.50   12.90
   8   3  -1   48.30   15.10
   8  -3  -1   25.70   15.00
   8   3   1    7.50   12.70
   8  -3  -1   34.50   12.20
   8  -3  -1   50.39   15.50
   8   3   1   31.00    8.20
   8   3   1   33.30   11.50
   9   3  -1   29.50    9.40
   9  -3   1    2.10   10.10
   9  -3   1   24.40   16.30
   9  -3  -1   13.30   12.60
   9   3   1   18.90    9.00
   9  -3  -1   12.80   19.40
   9   3   1   14.80   10.80
   9  -3  -1   63.99   26.60
   9   3   1   25.20    9.30
  10   3  -1   29.30   10.10
  10   3  -1   23.40    9.00
  10  -3   1    8.40    8.10
  10  -3  -1   18.30    9.30
  10   3   1   10.20    8.20
  10   3   1   -5.10   16.40
   0  -4   1  215.08   56.69
   0  -4  -1  243.18   39.00
   0   4  -1  236.78   36.20
   0   4  -1  238.38   35.80
   0  -4   1  213.78   37.40
   0   4   1  273.27   36.10
   1   4  -1  627.84   83.69
   1   4  -1  577.44   83.59
   1  -4   1  592.94   84.69
  -1   4   1  572.34   84.09
  -1  -4   1  628.04   85.09
   1   4   1  552.34   85.09
   1  -4  -1  526.15   85.09
   1   4   1  501.85   84.19
   2   4  -1 1851.61  256.37
  -2  -4  -1 1758.72  253.77
  -2   4   1 1570.34  254.97
  -2   4  -1 1507.65  255.37
   2   4   1 2054.19  255.17
   3  -4   1  621.44  275.07
   3   4  -1  575.14   85.49
  -3   4   1  544.55   86.09
  -3   4   1  519.35   83.99
  -3   4  -1  585.24   84.19
   3  -4  -1  889.71  309.77
  -4   4   1  591.64   95.69
   4  -4   1  621.24  378.06
   4  -4  -1 1295.47  441.16
  -4   4  -1  636.54   94.49
   5   4  -1   -1.70    6.70
   5  -4   1   12.50   17.70
   5   4  -1   -3.80    9.90
   5   4  -1    5.50    7.00
   5   4  -1   -3.30   12.40
   5  -4  -1   -5.50   17.00
   5   4   1   -9.20    5.80
   5   4   1   -8.60   11.00
   5   4   1    4.50    9.40
  -5   4  -1   31.50  117.59
   5  -4  -1    9.10   15.30
   5   4   1    0.50   13.80
   6  -4   1   72.89   21.20
   6   4  -1   99.39   15.50
   6   4  -1   87.79   21.70
   6  -4   1  119.29   22.40
   6   4  -1   62.99   14.90
   6   4  -1  107.19   19.40
   6   4   1   80.29   20.80
   6   4   1   61.39   16.20
   6   4   1   82.69   15.30
   6  -4  -1   79.99   23.00
   6  -4  -1  101.49   21.20
   6   4   1   90.59   18.00
   7  -4   1   26.20   15.20
   7  -4   1   42.00   14.60
   7   4  -1   40.80   14.30
   7   4  -1   43.80   11.70
   7  -4   1   27.70   16.10
   7   4  -1   42.80    9.20
   7  -4  -1   44.30   17.40
   7   4   1   26.90   15.10
   7   4   1   42.90    9.30
   7  -4  -1   70.89   18.90
   7   4   1   48.60   12.10
   7  -4  -1   45.10   15.30
   8   4  -1   19.00   13.00
   8   4  -1   36.20   10.50
   8  -4   1   32.80   15.30
   8  -4   1   10.90   11.50
   8  -4   1   14.80   11.70
   8   4  -1   24.00    6.90
   8  -4  -1   11.50   14.20
   8   4   1   48.30   11.10
   8  -4  -1    1.80   13.10
   8   4   1   28.80    7.10
   8  -4  -1   15.60   10.60
   8   4   1   32.00   12.60
   9   4  -1   37.70   10.30
   9  -4   1   13.50   11.30
   9   4   1   34.70    9.10
   9  -4  -1   40.80   13.00
   9  -4  -1   32.40   12.00
   9   4   1   48.40    8.00
  10   4  -1   14.10    9.40
  10  -4   1   -9.50    6.40
  10   4  -1    1.70    7.50
  10  -4   1    9.70    8.50
  10  -4  -1    4.70    9.10
  10   4   1    2.00    5.60
  10  -4  -1    4.00    7.70
   0  -5  -1  381.56   56.09
   0  -5   1  340.47   54.59
   0   5  -1  357.56   53.09
   1   5  -1   40.00   18.40
   1   5  -1   46.00    7.70
  -1  -5  -1   31.90   17.70
  -1   5   1   28.40    7.60
   1   5  -1   24.70    6.70
   1  -5   1   31.50   10.70
  -1   5  -1   38.00   11.70
   1   5   1   39.60   13.20
   1  -5  -1   28.40   13.70
  -1  -5   1   26.50   13.20
   1   5   1   16.70    8.20
  -1   5  -1   41.30    8.60
  -1   5  -1   15.00   28.90
   2   5  -1  143.39   20.50
  -2   5   1  119.89   25.10
   2   5  -1  135.59   33.90
  -2  -5  -1  117.79   31.10
  -2   5  -1  140.39   24.50
  -2   5  -1  124.09   25.80
   2  -5  -1  162.18  277.37
  -2  -5   1   92.79   27.90
  -2   5  -1   49.00   58.79
   3  -5   1 -382.16  390.86
  -3   5  -1   63.09   85.29
   3  -5  -1  156.18  413.36
  -4   5   1   26.70   29.30
   4  -5  -1    9.80   10.00
  -4   5  -1  -52.99  118.69
   4  -5  -1   26.20   16.10
   4   5   1   30.40    8.90
   5   5  -1   14.70   12.40
   5  -5   1   12.10   17.50
   5   5  -1   10.40    6.20
  -5   5   1    4.00   56.09
   5  -5   1    8.80   15.30
   5   5  -1   11.10    9.40
   5   5  -1   15.90    7.40
   5  -5  -1   -0.80   15.50
   5  -5  -1   41.50   18.60
   5   5   1   26.90    8.40
   5   5   1    6.00    6.20
   5   5   1   35.80   11.90
   5   5   1   18.80    9.30
   5   5   1   14.10   14.70
   6   5  -1   81.49   17.20
   6  -5   1  128.49   23.50
   6   5  -1   80.09   15.80
   6   5  -1   78.69   13.70
   6   5  -1   93.79   22.20
   6  -5   1   63.19   19.40
   6   5   1   71.29   18.20
   6   5   1   74.69   16.40
   6   5   1   71.49   14.30
   6  -5  -1   56.49   20.10
   7   5  -1   66.89   12.90
   7  -5   1   34.00   16.80
   7   5  -1   99.39   18.90
   7   5  -1   62.29   13.50
   7  -5   1  110.39   21.60
   7  -5  -1   43.10   17.80
   7  -5  -1  109.69   23.00
   7  -5  -1   31.00   18.30
   7   5   1   65.59   17.20
   7   5   1   78.79   13.10
   7   5   1   60.89   13.50
   8  -5   1   14.20   12.50
   8   5  -1   29.50    7.30
   8   5  -1   44.70   13.40
   8   5  -1   21.90   10.50
   8  -5   1    7.20   15.50
   8   5   1   38.40    7.60
   8  -5  -1   28.90   15.60
   8   5   1   20.70    9.30
   8  -5  -1   21.30   14.60
   8  -5  -1   41.70   16.90
   8   5   1   18.90   13.30
   9   5  -1   46.00   12.10
   9   5  -1   55.99   11.10
   9   5  -1   53.89    9.80
   9  -5   1   42.10   14.10
   9   5   1   34.20   11.80
   9   5   1   50.29   10.30
   9   5   1   59.89    9.70
   9  -5  -1   40.60   13.30
  10  -5   1   -3.70    8.60
  10  -5   1   -2.90    8.70
  10   5  -1    4.30    4.00
  10   5  -1   -1.30    8.30
  10   5   1    0.60    3.50
  10  -5  -1   12.60    9.10
  10  -5  -1   -4.00    9.00
   0   6   1  372.76   60.59
   0  -6  -1  424.76   63.69
   0  -6   1  414.26   62.19
  -1   6   1  144.49   26.40
  -1  -6  -1  152.48   29.90
   1  -6   1  132.19   26.10
   1  -6  -1  129.09   28.40
  -1  -6   1  137.09   30.30
  -2  -6  -1  299.87   57.09
   2  -6   1 -458.25  406.96
  -2   6   1  244.98   47.50
  -2   6  -1  331.17   49.40
  -2  -6   1  226.28   52.49
   2  -6  -1  876.21  500.55
  -3   6   1  481.95   91.29
   3   6  -1  579.24   85.29
   3   6  -1  542.95   86.09
   3   6  -1  623.04   85.19
   3   6  -1  574.04   85.69
   3   6   1  526.55   85.69
   3   6   1  666.43   85.39
   3   6   1  612.94   86.09
   3   6   1  571.54   85.29
   4  -6   1  160.88   44.90
  -4   6   1  224.68   46.90
   4   6  -1  212.98   30.60
   4   6  -1  191.18   31.40
   4   6  -1  190.58   30.20
   4   6   1  181.68   31.40
   4   6   1  197.98   31.30
  -4   6  -1  129.09   57.39
   4   6   1  200.48   30.50
   4   6   1  189.98   30.20
   5  -6   1  232.18   53.19
   5  -6  -1  310.57   53.39
   6  -6   1   10.00   17.70
   6   6  -1   34.10   13.80
   6  -6   1   52.79   19.10
   6   6  -1   30.30    8.80
   6   6  -1   17.90   10.00
   6   6  -1   34.20    7.20
   6   6   1   32.20    7.70
   6   6   1   45.00   10.00
   6   6   1   37.70    9.20
   6  -6  -1    4.20   15.70
   6  -6  -1   43.70   21.70
   6   6   1   39.80   14.60
   7   6  -1   54.59   14.50
   7   6  -1   78.19   13.60
   7  -6   1   54.29   19.10
   7  -6   1  106.59   22.40
   7   6   1  110.39   23.40
   7   6   1   79.29   13.80
   7   6   1   88.49   16.80
   7  -6  -1   58.59   20.90
   7  -6  -1   65.19   21.20
   8  -6   1   -1.90   11.30
   8  -6   1   14.50   12.10
   8   6  -1    0.10    7.50
   8   6  -1   16.80    9.80
   8   6  -1   -7.00    4.70
   8  -6  -1   -5.20   15.20
   8  -6  -1   -8.50   13.90
   8   6   1    0.00    4.10
   8   6   1    7.30    6.50
   8   6   1    1.90    8.60
   9   6  -1   18.80    8.80
   9  -6   1    7.50    9.10
   9  -6   1    5.50    9.00
   9   6  -1   17.20    4.40
   9   6  -1   15.70    7.50
   9  -6  -1   14.60   10.50
   9  -6  -1    4.90   13.10
   9   6   1   13.60    6.30
   9   6   1   21.20    4.60
   9   6   1   28.10    9.10
   0  -7  -1  447.76   74.09
   0  -7   1  443.26   75.59
   0   7  -1  401.36   73.19
   0   7   1  479.55   72.49
   0   7  -1  462.05   68.59
   0   7   1  478.45   68.49
   0   7   1  534.55   74.79
   1   7  -1   14.50    9.20
   1   7  -1   -0.60    7.40
  -1  -7  -1   44.30   28.00
  -1  -7  -1    3.00   21.00
   1  -7   1   -5.10   22.80
  -1   7   1    8.20    8.20
   1   7  -1   25.60   13.60
  -1   7   1   11.50   18.60
   1  -7   1    7.20   33.90
   1   7  -1   -1.90   11.50
   1  -7  -1   -2.60   34.80
  -1   7  -1   11.80   19.90
   1   7   1    9.00   10.60
   1   7   1    5.70    6.90
  -1   7  -1   -2.20    8.60
  -1  -7   1  -31.30   22.00
   1   7   1   -7.80   12.70
   1   7   1   18.00   10.60
  -1  -7   1    7.90   24.20
   1  -7  -1    4.70   20.30
  -2   7   1  308.57   62.99
   2   7  -1  335.27   57.19
   2   7  -1  408.46   57.79
  -2   7   1  348.67   56.89
   2   7  -1  411.16   56.39
   2   7   1  380.86   58.29
   2  -7  -1  389.46   78.99
   2   7   1  354.46   57.49
  -2   7  -1  328.87   65.39
   2   7   1  448.76   56.39
  -2   7  -1  395.56   57.39
  -3   7   1  237.08   43.70
   3   7  -1  290.97   42.40
  -3  -7  -1  399.86   63.79
  -3   7   1  276.47   55.99
   3   7  -1  250.97   43.30
   3   7  -1  278.87   42.80
  -3  -7   1  378.36   66.79
   3   7   1  282.77   44.10
   3   7   1  307.37   42.50
   3   7   1  279.77   42.60
   3   7   1  258.97   43.60
   4   7  -1  138.19   23.50
   4   7  -1  133.39   21.20
  -4  -7  -1   90.19   39.60
   4  -7  -1  138.99   46.70
   4   7   1  128.49   22.90
   4   7   1  102.69   22.90
   4   7   1  151.18   23.50
   4   7   1  121.79   21.60
  -4  -7   1  156.98   44.80
   5   7  -1  186.18   28.90
   5  -7   1  134.09   38.00
   5   7  -1  196.58   29.50
   5   7  -1  180.28   30.90
   5   7   1  202.38   29.60
  -5  -7   1  141.09   41.90
   5   7   1  229.88   33.90
   5   7   1  183.98   28.90
   5   7   1  189.18   30.50
   6   7  -1   24.30    8.80
   6   7  -1   18.40    5.80
   6  -7   1   21.40   18.40
   6   7  -1   11.00    6.40
   6   7  -1   19.40   11.90
   6  -7   1   17.20   22.30
   6   7   1    7.20    6.60
   6  -7  -1   15.10   24.00
   6   7   1   19.30    5.90
   6   7   1   23.30   11.70
   6   7   1   17.10    8.40
   7   7  -1   19.70   14.40
   7   7  -1   14.50    9.20
   7  -7   1  -16.00   17.40
   7   7  -1   14.00    6.50
   7  -7   1   19.30   20.00
   7  -7  -1  -22.30   16.70
   7   7   1   -5.20   13.10
   7   7   1   11.20    5.80
   7  -7  -1   14.10   22.60
   7   7   1   10.50    9.70
   8   7  -1   10.80    7.40
   8   7  -1   13.90    6.10
   8  -7   1   -2.10    9.00
   8  -7   1    7.90   15.40
   8   7  -1    5.30    3.70
   8   7   1    3.00    5.80
   8  -7  -1    0.10   10.10
   8   7   1    7.30    9.00
   8   7   1   11.90    3.90
   8  -7  -1    4.70   19.40
   9  -7   1    5.10    7.30
   9   7  -1   -5.30    6.30
   9   7  -1    4.50    6.00
   9   7  -1   -0.70    4.90
   9  -7   1    0.70   11.80
   9   7   1    3.60    4.00
   9   7   1   -6.00    5.30
   9  -7  -1   -1.40    7.80
   0   8   1  151.08   30.00
   0   8   1  168.68   31.60
   0   8  -1  179.08   27.40
   0   8   1  193.08   27.20
   0   8  -1  175.18   34.50
   0  -8  -1  171.88   37.40
   0   8  -1  158.48   30.50
   0  -8   1  154.78   34.60
   1   8  -1  169.08   25.90
  -1  -8  -1  186.58   40.10
  -1  -8  -1   55.99   42.60
   1  -8   1  138.49   34.10
  -1   8   1  144.79   30.60
  -1   8   1  127.69   24.70
   1   8  -1  135.59   28.40
   1   8  -1  162.68   26.70
   1   8   1  150.08   27.00
   1   8   1  163.58   32.20
  -1   8  -1  153.68   31.00
  -1   8  -1  145.09   24.90
  -1  -8   1  137.59   49.10
   1   8   1  158.08   27.90
  -2   8   1   57.89   25.20
  -2  -8  -1  128.69   52.89
  -2  -8  -1  100.19   26.90
   2   8  -1   92.29   15.40
   2   8  -1   66.19   19.20
   2  -8  -1   31.60   23.20
  -2   8  -1   48.70   24.10
  -2  -8   1   65.39   26.70
   2   8   1   84.69   14.80
  -2  -8   1   77.29   43.00
   2   8   1  107.99   19.90
  -3  -8  -1   47.70   24.90
   3   8  -1   54.29   12.40
   3   8  -1   76.99   13.80
   3  -8   1   15.80   27.40
  -3   8   1  102.99   16.20
   3   8  -1   70.39   14.30
  -3   8   1   51.39   29.40
   3  -8  -1   26.50   27.00
   3   8   1   55.69   13.20
  -3  -8   1  108.59   30.10
   3   8   1   62.59   12.70
  -3   8  -1   51.29   29.10
   3   8   1   59.99   14.50
   3   8   1   83.19   13.70
   4   8  -1   17.60    6.80
  -4   8   1    5.80   32.60
   4   8  -1   20.80    9.20
  -4  -8  -1   27.10   25.90
   4   8  -1   13.90    6.90
  -4   8   1   30.60   15.00
   4   8   1   29.20    7.70
  -4  -8   1   -2.30   24.20
  -4   8  -1   25.40   26.90
   4   8   1   18.10    9.40
   4   8   1   15.90    7.10
   5  -8   1   34.30   18.40
   5   8  -1   30.30    9.20
  -5  -8  -1    6.10   25.60
   5   8  -1   26.40    7.70
   5   8  -1   39.90   11.50
   5   8  -1   16.60    6.90
  -5   8   1  -10.80   35.50
  -5   8  -1   -0.40   34.40
   5   8   1   20.60   10.40
   5   8   1   11.30    6.30
  -5  -8   1   43.10   24.20
   5   8   1   17.80    8.30
   5   8   1   21.60    6.70
   6   8  -1   52.09   10.80
   6   8  -1   20.50    8.30
   6  -8   1   21.80   18.00
   6   8  -1   24.70    9.40
  -6  -8  -1   35.10   23.40
   6   8   1   37.70   10.50
   6  -8  -1   15.40   16.70
  -6  -8   1   34.60   20.00
   6   8   1   37.70   12.40
   7  -8   1   30.60   25.70
   7   8  -1   -2.60    6.30
   7   8  -1    3.40    3.80
   7   8  -1    1.10    5.80
  -7  -8  -1   20.50   16.60
   7  -8   1    1.20    9.00
   7  -8  -1   11.10    9.90
   7   8   1    1.50    3.30
  -7  -8   1    4.10   15.50
   7   8   1   -3.40    6.90
   7   8   1    8.60    6.00
   8   8  -1   25.00    6.20
   8   8  -1   14.20    5.80
   8   8  -1   15.30    3.80
   8  -8   1    5.50    7.40
   8   8   1   26.50   10.40
   8   8   1   22.80    5.90
   8  -8  -1   13.70    8.30
   0   9   1  242.98   44.90
   0   9  -1  263.57   38.80
   0   9   1  278.07   38.90
   0  -9  -1  208.08   48.70
   0   9  -1  251.97   46.70
   1   9  -1   31.80    7.60
   1   9  -1   23.90   14.40
   1  -9   1   40.10   22.60
  -1  -9  -1   14.50   19.90
   1   9  -1    1.80   18.00
  -1  -9  -1   23.70   34.30
  -1   9   1   23.90    7.40
  -1   9   1   14.90   18.50
   1   9   1   30.30    7.40
   1   9   1   32.50   17.90
  -1  -9   1    9.90   31.90
   1   9   1   54.49   19.10
  -1  -9   1   26.10   20.40
  -1   9  -1   21.30    7.90
  -1   9  -1   38.40   18.90
   1  -9  -1   31.00   22.40
  -2   9   1  103.29   28.60
   2   9  -1  121.39   19.50
  -2   9   1   77.49   15.70
  -2  -9  -1  111.49   28.00
  -2  -9  -1   97.79   54.09
   2   9  -1  121.19   16.70
  -2  -9   1   10.90   49.20
   2   9   1  103.09   16.60
  -2   9  -1   49.30   26.60
  -2   9  -1   92.89   18.90
   2   9   1   70.49   20.40
  -2  -9   1   69.89   25.10
  -3   9   1  -25.20   28.10
  -3   9   1   -6.50    7.40
  -3  -9  -1   -5.50   21.30
   3   9  -1    4.10    6.00
   3   9  -1   10.90   10.20
   3   9   1    3.20    5.70
   3  -9  -1   -6.00   48.10
  -3   9  -1   10.20   25.10
   3   9   1  -11.30   10.50
  -3  -9   1  -13.90   20.50
   4   9  -1   15.10    8.90
  -4   9   1   20.00   30.40
   4   9  -1   20.00    9.70
   4   9  -1    0.50    7.50
   4   9  -1   -4.10    5.00
  -4  -9  -1   -5.70   21.40
   4   9   1   -7.20    7.50
  -4   9  -1    5.30   25.30
   4   9   1   13.20    5.70
  -4  -9   1    9.20   20.30
   4   9   1    4.20    9.40
   5  -9   1    4.00   12.70
  -5  -9  -1   25.30   20.10
   5   9  -1   -0.60    7.30
   5   9  -1   24.70   17.50
   5   9  -1   16.70    6.20
  -5   9   1   -7.70   31.40
   5   9   1    8.70    5.60
   5   9   1   22.80    9.40
  -5  -9   1   15.30   18.10
  -5   9  -1    0.40   31.60
   5   9   1   32.50   15.50
   5   9   1    5.60    8.40
   6   9  -1    2.70    6.90
  -6  -9  -1    9.20   14.90
   6   9  -1    4.80    6.00
   6   9  -1   -4.20    3.70
   6  -9   1   -1.60    9.10
   6  -9  -1   -2.50   10.20
  -6  -9   1   11.00   13.90
   6   9   1    6.70    4.20
   6   9   1    8.00    5.70
   6   9   1   -2.60    3.10
   6   9   1    6.00    5.00
  -7  -9  -1    6.90   12.50
   7   9  -1   28.40    5.30
   7   9  -1   24.10    6.60
   7   9   1   31.20    6.00
   7   9   1   40.30    7.30
  -7  -9   1   10.20   11.60
   7  -9  -1   12.50    8.00
   0  10  -1   27.80    7.30
   0  10   1   46.90   21.00
   0  10   1   21.60    6.40
   0  10  -1   25.60   25.40
   0 -10  -1   12.70   20.00
   0 -10   1   -0.40   19.00
  -1  10   1   57.09   28.30
  -1 -10  -1   32.10   19.60
  -1  10   1   41.20    8.30
  -1  10  -1   50.59   27.60
  -1 -10   1   19.30   36.50
   1  10   1   33.00    7.70
   1 -10  -1    2.80   26.90
  -1 -10   1   27.30   18.80
  -1  10  -1   41.10    9.40
  -2 -10  -1   35.40   21.80
   2  10  -1   73.29   11.50
  -2  10   1   21.60   27.50
  -2  10   1   99.39   15.60
   2  10  -1   26.30   18.30
   2 -10   1   -3.20   38.00
  -2 -10   1   37.00   21.10
   2  10   1   66.49   12.00
  -2 -10   1  124.99   54.89
   2 -10  -1   -1.10   32.90
   2  10   1   87.19   23.60
   3  10  -1    3.30    9.00
  -3  10   1    2.60   26.30
   3 -10   1   13.50   18.10
  -3  10   1   -8.40    7.30
  -3 -10  -1   11.20   33.70
  -3  10  -1  -14.10   26.00
   3  10   1    4.80   11.40
   4  10  -1   22.00    8.20
   4 -10   1    2.70   12.80
   4  10  -1   -1.10    6.30
  -4 -10  -1   -3.40   15.60
   4  10  -1    6.00    4.50
   4  10   1   -0.40    3.50
   4  10   1    3.10    7.70
  -4 -10   1   -0.20   13.80
   4  10   1   11.80    6.20
   5  10  -1   -4.20    6.60
  -5 -10  -1   11.60   13.60
   5  10  -1    3.00    5.10
   5  10  -1   13.50    6.00
   5  10  -1   15.80    4.20
   5 -10   1   -0.30    9.70
   5  10   1   13.50    3.60
  -5 -10   1    0.20   11.00
   5 -10  -1   -3.60    8.50
   5  10   1    7.70    5.00
   5  10   1    3.40    7.00
   5  10   1    7.90    5.30
   6  10  -1   15.90    5.00
   6  10  -1   11.70    4.30
   6 -10   1    5.50    7.00
   6  10  -1    4.40    4.60
  -6 -10  -1    6.00   12.70
  -6 -10   1   18.80   12.40
   6  10   1   19.70    5.30
   6  10   1    7.20    4.60
   6 -10  -1   -1.20    8.50
   6  10   1   14.30    4.20
   0  11   1   11.70    5.20
   0  11  -1    4.30    5.70
  -1  11   1   17.40    5.80
   1  11  -1   27.80    5.80
  -1 -11  -1   25.20   18.20
   1  11   1    7.40    4.30
  -1  11  -1   12.80    6.40
  -1 -11   1   -6.00   15.20
   2  11  -1   16.50    4.50
  -2  11   1   11.10    5.80
  -2 -11  -1  -10.30   14.10
   2  11   1   13.80    4.30
  -2 -11   1    9.90   13.40
  -3 -11  -1   -7.40   11.70
   3  11  -1   20.80    4.50
   3 -11  -1   28.30   17.10
   3  11   1   13.40    3.80
  -3 -11   1   -5.40   12.20
  -4 -11  -1  -20.60   12.60
   4  11  -1    2.50    3.10
   4  11  -1    4.00    5.30
   4  11   1   -0.20    5.00
   4 -11  -1   22.10   12.10
   4  11   1   -0.90    2.60
  -4 -11   1    7.00   10.80
  -5 -11  -1   16.90   12.00
   5  11  -1   30.60    7.20
  -5 -11   1    8.70   11.90
   5  11   1   19.50    6.00
   5 -11  -1   17.40   14.10
   0  12   1    0.20    4.00
   0  12  -1    7.80    4.40
  -1  12   1    7.00    4.60
   1  12  -1    7.00    3.50
   1  12  -1    4.70    5.40
   1  12   1   10.00    3.70
   2  12  -1    6.20    5.70
   2  12  -1   12.40    3.60
   2  12   1   15.20    6.10
   2  12   1   10.10    5.10
   1   0   2 2317.77  371.36
   1   0  -2 2558.14  367.86
   1   0  -2 2833.82  367.46
   1   0  -2 2491.65  384.96
  -1   0   2 2421.66  367.66
  -2   0   2   93.59   14.10
   2   0  -2   78.69   12.80
   2   0  -2   46.20   65.99
   2   0   2   48.20   52.49
  -2   0   2   79.59   13.40
  -2   0   2   46.30   95.79
  -3   0   2  256.37  172.18
  -3   0   2  159.98   23.40
   3   0  -2   74.79  111.69
   3   0   2   82.19   82.09
   3   0  -2  131.29   21.80
  -3   0   2  143.19   22.60
  -3   0  -2  230.78  101.19
  -4   0   2  337.67   52.99
  -4   0   2  313.17   51.99
  -4   0  -2  378.66   51.79
  -4   0  -2  577.44  199.78
  -5   0   2   76.19   20.10
  -5   0  -2   52.29   14.90
  -5   0  -2   94.99   19.00
  -5   0  -2  140.29   55.69
   6   0  -2   91.09   26.40
   6   0  -2  114.29   22.70
   6   0   2  122.79   25.40
   6   0   2  116.69   24.00
  -6   0   2   43.70   56.69
   7   0   2  363.46   62.69
   7   0   2  400.66   62.19
   7   0  -2  354.06   64.99
   7   0   2  409.06   62.49
   7   0  -2  436.56   62.29
   8   0   2  217.58   36.10
   8   0  -2  180.38   37.80
   8   0   2  193.48   35.50
   9   0   2   -3.80   11.90
   9   0   2   -2.20   11.30
   9   0  -2   -2.10   11.60
   9   0  -2   11.50   10.70
  10   0  -2    9.90    8.40
  10   0  -2   13.20   10.20
  10   0   2   27.30    9.50
  10   0   2    8.10    8.50
  11   0  -2   39.20   12.70
   0   1  -2  363.26   63.29
   0  -1  -2  454.65   63.19
   0   1   2  478.05   63.19
   1   1  -2 2613.14  383.66
   1   1  -2 2501.45  382.96
  -1   1   2 2819.22  383.26
  -1  -1   2 2656.33  384.26
  -1  -1   2 2618.04  383.76
   2  -1   2 3398.86  472.15
  -2  -1  -2 3392.46  453.75
  -2   1   2 2671.63  454.05
  -2  -1  -2 3399.46  477.15
   2  -1  -2 3307.97  484.55
  -2  -1   2 3646.74  509.65
   2  -1  -2 2952.10  454.05
  -2  -1   2 2832.62  454.65
  -3  -1  -2 1834.22  245.28
  -3  -1  -2 1700.33  302.57
  -3   1   2 1787.62  245.88
  -3   1   2 1528.05  245.48
   3  -1   2 1328.47  279.37
  -3   1  -2 1870.51  253.57
   3  -1  -2 1527.85  245.08
  -3  -1   2 1586.24  245.98
   3  -1  -2 1420.56  296.57
  -3  -1   2 2479.65  413.86
  -3   1  -2 1837.42  245.38
   4  -1   2  168.28  130.49
  -4   1   2  135.99   24.20
  -4  -1  -2  129.49  176.18
  -4  -1  -2  145.39   22.00
  -4  -1  -2  141.29   23.30
  -4   1  -2  148.19   22.50
  -4  -1   2  102.39   22.40
  -4   1  -2  129.09   41.20
   4  -1  -2   18.80  181.88
  -4  -1   2  141.29   24.60
  -5   1   2   76.99   17.60
  -5  -1  -2   59.69   17.70
  -5  -1  -2   72.49   14.20
   5  -1   2  135.19  233.68
  -5  -1  -2  142.49   65.69
  -5   1   2   88.99   18.10
  -5  -1   2   46.90   14.70
  -5   1  -2   -4.30   49.10
   5  -1  -2  151.88  332.47
  -5  -1   2   69.49   21.50
  -5   1  -2   74.89   15.60
   6   1  -2  111.59   24.50
   6  -1   2  127.79   24.20
   6  -1   2  125.19   30.90
  -6   1  -2   60.59   31.20
   6   1   2  115.29   22.00
   6  -1  -2  110.99   27.90
   6  -1  -2   88.79   25.10
   6   1   2  175.48   28.70
   7   1  -2  125.79   26.10
   7  -1   2  119.89   24.00
   7  -1   2  124.59   23.50
   7   1   2   83.19   20.20
   7   1   2  111.29   24.60
   7  -1  -2  136.99   27.20
   7  -1  -2  118.19   25.40
   7   1   2  100.39   21.60
   7   1   2  112.79   25.80
   7  -1  -2   82.69   22.90
   8   1  -2   57.79   11.40
   8   1  -2   97.59   22.90
   8  -1   2   62.99   15.80
   8   1  -2   59.69   17.00
   8  -1   2   54.59   15.60
   8  -1   2   20.80   18.30
   8   1   2   40.20   11.50
   8   1   2   69.49   16.10
   8   1   2   56.69   17.90
   8  -1  -2   92.59   20.30
   8   1   2   49.99   14.80
   8  -1  -2   71.69   16.30
   8   1   2   28.80   14.70
   8  -1  -2   64.99   17.90
   9  -1   2   20.40   11.60
   9   1  -2   15.50   12.90
   9  -1   2   31.90   13.40
   9   1  -2   -1.00   10.30
   9  -1  -2   17.50   16.90
   9  -1  -2   16.60   11.10
   9   1   2   -0.80   12.80
   9   1   2   15.60   12.30
   9  -1  -2    7.30   12.00
  10   1  -2    4.50    7.30
  10   1  -2   27.60   10.10
  10  -1   2   12.10    9.80
  10  -1   2    5.80    7.80
  10   1   2   22.90   11.40
  10   1   2   25.90   12.40
  10  -1  -2   25.00   10.40
  10  -1  -2    5.30    8.00
  11  -1   2   20.90   11.40
  11  -1  -2    6.60    8.80
   0   2   2 2601.04  373.66
   0  -2   2 2572.24  376.46
   0  -2  -2 2679.93  373.56
   0   2  -2 2440.46  373.56
   1   2  -2  191.88   29.40
  -1  -2  -2  203.78   29.70
  -1  -2   2  195.28   34.00
   1   2   2  212.68   29.10
   1  -2  -2  150.98   37.60
   2   2  -2 1641.84  223.48
   2  -2   2 1537.75  222.28
   2  -2  -2 1315.97  225.88
  -2  -2   2 1420.66  223.88
  -2   2  -2 1756.92  230.18
  -3   2   2  847.72  126.59
   3  -2   2  990.40  135.59
   3   2  -2  780.42  126.79
  -3  -2  -2 1086.99  224.58
   3  -2   2 1241.78  210.78
   3  -2  -2 1199.08  253.77
  -3   2  -2  720.93  135.99
   3  -2  -2  886.91  132.09
   3  -2  -2  983.10  126.59
  -3  -2   2  747.03  127.69
  -4   2   2  276.17   41.00
  -4  -2  -2  251.17   39.20
  -4  -2  -2   54.79  246.78
  -4   2   2  268.17   41.90
  -4  -2   2  312.67   53.09
  -4   2  -2  280.07   40.70
   4  -2  -2  239.08   53.99
  -4  -2   2  206.78   42.60
   4  -2  -2  468.45  226.08
  -5   2   2   99.69   22.50
   5  -2   2   75.79  270.37
  -5   2   2   89.19   21.60
  -5  -2  -2   62.19   14.40
  -5  -2  -2  239.28   88.59
  -5   2  -2   82.89   61.99
   5  -2  -2  409.76  408.96
  -5  -2   2   68.89   24.50
  -5   2  -2   72.59   17.30
   6   2  -2   62.29   12.50
   6  -2   2   69.39   18.00
   6   2  -2   78.79   26.70
   6   2  -2   69.39   17.10
   6  -2   2   78.19   19.20
   6   2  -2   82.69   18.00
   6   2   2   65.89   15.90
   6   2   2   80.89   26.60
   6   2   2   30.60   20.40
   6   2   2   56.09   12.40
   6  -2  -2   94.29   25.20
   6  -2  -2   47.10   16.30
   6  -2  -2   59.09   20.80
   7   2  -2   26.40   13.00
   7  -2   2   76.09   25.00
   7  -2   2   21.50   20.00
   7   2  -2   26.60    8.50
   7   2  -2   41.40   19.50
   7  -2  -2   46.60   28.50
   7  -2  -2   36.10   16.20
   7   2   2   29.50   20.30
   7   2   2   57.39   15.50
   7   2   2   37.30    9.20
   7   2   2   21.30   15.10
   7   2   2   48.20   12.40
   8  -2   2   34.20   14.20
   8   2  -2   18.50   13.00
   8   2  -2   27.90   13.30
   8  -2   2   41.90   14.30
   8   2  -2   20.70    8.10
   8  -2  -2   41.10   17.30
   8   2   2   48.10   11.70
   8   2   2   12.00   14.20
   8  -2  -2   31.00   14.40
   8   2   2   14.60    7.70
   8   2   2   40.90   18.60
   8   2   2   23.80   14.00
   9  -2   2    2.60   12.10
   9   2  -2   40.10   14.20
   9  -2   2   31.30   13.70
   9  -2  -2   14.20   14.20
   9  -2  -2   41.50   18.60
   9   2   2   45.20   13.40
   9  -2  -2   27.10   13.00
   9   2   2   28.70   13.80
   9   2   2   20.30   15.10
  10   2  -2    4.40    7.50
  10  -2   2   20.10    7.80
  10  -2   2   22.50    9.30
  10  -2  -2   14.60    8.50
  10  -2  -2   20.20    8.80
   0  -3   2   32.50    6.80
   0   3  -2   25.70    8.70
   0   3   2   25.20    5.60
   0  -3  -2   22.20    5.00
   0  -3   2    7.10   12.60
   0  -3  -2    9.60    9.90
   0   3   2   16.70    4.80
   0  -3  -2    9.10   17.90
   0   3  -2   -5.70   14.00
   0   3  -2   20.70    6.40
   1  -3   2  782.82  104.59
  -1  -3  -2  738.93  104.29
  -1  -3  -2  721.33  106.69
   1   3  -2  753.52  105.79
  -1   3   2  613.94  104.29
   1  -3   2  755.22  111.59
   1   3  -2  600.24  103.99
  -1   3  -2  721.63  105.19
  -1  -3   2  770.82  104.59
  -2  -3  -2  959.00  161.88
  -2   3   2 1183.28  162.38
   2   3  -2 1217.08  163.88
   2  -3   2 1093.29  162.18
  -2   3  -2 1140.39  163.58
   2  -3  -2 1088.19  173.18
  -3  -3  -2 1010.00  273.67
  -3  -3  -2  503.05   75.59
  -3  -3   2  462.35   98.89
  -3   3  -2  545.55   92.19
  -4   3   2 1047.10  152.58
   4  -3   2  918.11  284.67
  -4   3  -2 1025.00  151.28
   4  -3  -2 1020.10  167.88
   4  -3  -2  892.41  376.16
  -5   3   2  246.18   42.60
  -5  -3  -2  313.97  114.09
  -5   3   2  233.48   49.10
   5  -3   2 -175.98  365.66
  -5   3  -2  121.79   87.69
   5  -3  -2  958.10  490.95
  -5   3  -2  238.08   41.60
   6   3  -2  161.28   30.80
   6   3  -2  162.88   26.70
   6   3  -2  134.69   30.20
   6  -3   2  173.08   31.90
   6   3  -2  178.38   33.80
   6  -3   2  222.08   35.80
   6  -3  -2  174.98   32.10
   6   3   2  157.28   28.90
   6  -3  -2  158.38   41.00
   6   3   2  186.78   27.20
   7   3  -2  137.19   30.00
   7   3  -2  145.29   25.60
   7  -3   2  187.78   34.20
   7  -3   2  165.58   29.10
   7  -3  -2  132.59   29.90
   7   3   2  173.88   26.10
   7  -3  -2  184.58   32.60
   7   3   2  178.18   28.00
   7  -3  -2  164.48   36.90
   8   3  -2  127.19   26.10
   8   3  -2   85.59   21.30
   8   3  -2   93.79   20.80
   8  -3   2   86.59   23.70
   8  -3   2  111.79   23.50
   8   3  -2  130.59   19.20
   8  -3  -2  133.89   26.10
   8   3   2  115.09   18.60
   8  -3  -2   93.69   23.30
   8  -3  -2   70.29   22.90
   8   3   2   54.39   24.10
   8   3   2  140.79   21.20
   9   3  -2   48.60    9.30
   9  -3   2   50.09   22.60
   9  -3   2   28.70   16.00
   9   3  -2   50.79   13.00
   9   3   2   67.29   11.80
   9  -3  -2   17.10   17.20
   9   3   2   29.50   10.60
   9  -3  -2   51.39   15.60
  10  -3   2   -4.10    7.00
  10  -3   2   -0.40    8.30
  10   3  -2    2.00    7.90
  10   3  -2   16.60    8.30
  10  -3  -2   11.20    9.60
  10  -3  -2   -0.10    7.50
  10  -3  -2   12.40   10.70
   0   4   2 1424.66  234.38
   0  -4  -2 1703.23  235.38
   0   4  -2 1428.26  236.58
   0   4  -2 1836.42  234.48
   0  -4   2 1676.13  246.98
   1   4  -2  286.17   40.30
   1  -4   2  292.17   41.60
  -1   4   2  262.17   40.80
  -1  -4  -2  309.87   45.90
   1  -4  -2  200.78   65.09
  -1   4  -2  322.57   43.10
  -1  -4   2  304.07   42.20
   1   4   2  248.78   41.40
   1  -4  -2  235.88   42.60
  -1  -4   2  230.08   61.39
   1   4   2  241.78   41.50
   2   4  -2  164.98   31.90
   2   4  -2  159.78   25.10
  -2   4   2  181.78   30.60
  -2  -4  -2  156.78   25.90
  -2  -4   2  135.79   31.50
  -2  -4   2  180.38   63.79
   2  -4  -2  145.79   67.89
  -2   4  -2  217.28   27.90
  -2   4  -2  161.48   31.90
   3  -4   2  212.98  263.37
  -3  -4  -2   45.30    9.10
  -3   4   2   52.49   13.30
  -3  -4   2   15.20   15.70
  -3   4  -2   -1.60   53.49
   3  -4  -2   49.10   13.40
  -3   4  -2   60.99   13.00
  -3  -4   2   -3.20   80.09
   3  -4  -2  167.58  263.17
  -3   4  -2   92.29   23.10
  -4   4   2  134.89   30.20
   4  -4   2  286.67  324.77
  -4   4  -2  101.09   80.09
  -4   4  -2  156.88   30.00
   4  -4  -2  718.13  467.85
   5  -4   2   28.40   18.40
   5  -4   2   53.79   18.60
   5   4  -2   51.19   14.00
   5   4  -2   51.09   10.00
   5   4  -2   44.10   13.00
   5   4   2   42.70    9.40
   5   4   2   27.10   17.10
   5  -4  -2   53.19   18.00
   5   4   2   47.60   14.50
   5  -4  -2   33.40   18.80
   5   4   2   40.10   11.30
   6   4  -2    5.30    5.90
   6  -4   2    2.60   13.40
   6   4  -2    8.40   10.60
   6  -4   2    6.10   16.10
   6  -4   2   -8.10   16.30
   6   4  -2    0.80   10.10
   6   4   2    7.80    5.90
   6   4   2    2.30   14.60
   6  -4  -2    1.30   17.20
   6  -4  -2   -1.10   13.90
   6   4   2    9.10    8.50
   7  -4   2   91.79   20.70
   7   4  -2   92.69   20.00
   7   4  -2   83.09   19.30
   7   4  -2   73.59   15.40
   7   4   2   91.99   16.20
   7  -4  -2   51.29   22.70
   7  -4  -2  117.79   23.10
   7   4   2   99.49   17.00
   8  -4   2   22.40   12.20
   8   4  -2   36.30    8.80
   8   4  -2   57.69   13.30
   8   4  -2   38.10   13.90
   8  -4   2   62.09   16.70
   8  -4  -2   42.60   14.80
   8  -4  -2   67.99   17.20
   8   4   2   13.40   13.70
   8  -4  -2   29.70   17.50
   8   4   2   53.69   11.80
   8   4   2   65.09   11.50
   9   4  -2    0.40   10.40
   9  -4   2    2.40   11.30
   9  -4   2    5.10    7.10
   9   4  -2    1.60    9.00
   9  -4  -2    8.50    9.50
   9  -4  -2   11.40   10.30
   9  -4  -2   -3.00    8.30
   9   4   2   14.90    6.70
   9   4   2   15.40    9.50
  10   4  -2    7.40    5.20
  10  -4   2  -10.20    7.80
  10   4  -2    8.30    8.50
  10  -4  -2   25.20   12.10
  10  -4  -2    1.50    7.50
  10   4   2   -7.50    7.30
  10  -4  -2   33.60   14.70
   0   5  -2   51.29    9.80
   0  -5  -2   29.50   15.50
   0   5   2   32.60    9.00
   0  -5  -2   55.19   12.30
   0   5   2   19.80   14.70
   0  -5   2   38.60   11.30
   0   5  -2   42.50    9.10
   1  -5   2  387.66   57.79
  -1   5   2  358.66   57.89
   1   5  -2  384.26   57.19
  -1  -5  -2  447.86   62.49
   1  -5  -2  346.37   59.29
  -1   5  -2  305.77   88.59
   1   5   2  435.56   58.89
  -1  -5   2  394.36   58.79
   1   5   2  344.87   57.79
  -2  -5  -2  321.37   75.09
   2   5  -2  446.56   60.59
  -2   5   2  386.86   62.69
  -2   5  -2  457.05   63.59
  -2   5  -2  369.96   64.59
   2  -5  -2  962.90  369.76
   3  -5   2  246.58  414.16
  -3   5   2   49.00   17.80
  -3   5  -2   38.40   22.00
  -3   5  -2   64.99   17.60
   3  -5  -2   56.09   17.00
  -3   5  -2   50.79   83.59
  -4   5   2  851.01  141.99
  -4   5   2  694.93  113.79
   4   5  -2  733.23  106.19
   4   5  -2  733.03  105.39
   4   5  -2  768.12  107.29
   4   5  -2  647.64  105.29
   4   5   2  726.93  105.59
   4   5   2  747.93  106.29
   4   5   2  649.64  105.19
   4   5   2  747.33  105.79
   5   5  -2  258.07   38.50
   5   5  -2  202.08   34.80
   5  -5   2  281.37   40.70
   5  -5   2  178.98   44.50
   5   5  -2  230.48   36.80
   5   5  -2  227.18   34.50
   5  -5  -2  259.07   46.00
   5   5   2  218.48   37.20
   5   5   2  234.38   41.60
   5   5   2  212.18   34.50
   5   5   2  211.08   35.70
   5   5   2  243.08   35.90
   6  -5   2   15.90   16.30
   6   5  -2   26.20    6.80
   6   5  -2   32.60   10.00
   6  -5   2   22.30   15.90
  -6   5   2  -11.10   67.79
   6   5  -2   28.10   13.20
   6   5  -2   14.40    7.30
   6   5   2   23.20    7.00
   6  -5  -2    4.30   15.10
   6   5   2   11.40   13.50
   6   5   2   22.50    9.50
   6  -5  -2   25.50   17.30
   7   5  -2  160.28   25.30
   7   5  -2  206.88   31.10
   7  -5   2  159.18   31.30
   7   5  -2  159.98   28.10
   7  -5   2  114.49   32.40
   7   5   2  132.49   33.00
   7  -5  -2  140.79   33.70
   7  -5  -2  222.38   36.30
   7   5   2  169.18   25.50
   7   5   2  161.98   27.50
   8   5  -2   42.30   13.40
   8  -5   2   24.00   16.10
   8   5  -2   28.40    7.90
   8   5  -2   37.70   13.50
   8   5   2   41.80    8.30
   8  -5  -2   29.80   16.20
   8   5   2   28.00   24.50
   8  -5  -2   38.60   17.90
   8  -5  -2    9.80   16.00
   8   5   2   50.09   11.10
   9   5  -2   73.09   11.40
   9   5  -2   87.29   14.70
   9   5  -2   37.30   12.90
   9   5   2   69.49   14.90
   9   5   2   59.29   13.20
   9   5   2   59.99   11.20
   9  -5  -2   50.29   14.70
  10   5  -2    4.00    7.10
  10   5  -2   12.10    4.20
  10  -5   2   -1.50    6.70
  10  -5   2   14.10    9.30
  10   5   2  -13.60    9.00
  10  -5  -2    6.20    9.90
  10   5   2   -2.70    3.90
  10  -5  -2    7.50    8.60
   0  -6  -2   81.69   25.60
   0   6   2  107.59   20.40
   0   6  -2   97.19   18.10
  -1   6   2  101.89   17.10
  -1  -6  -2   72.79   26.40
   1   6  -2   93.79   14.60
  -1   6  -2   73.29   17.20
  -1   6  -2   72.59   17.70
  -1  -6   2   46.50   18.80
   2   6  -2   33.90    8.60
   2   6  -2   27.20   12.80
   2  -6   2    3.10   11.10
  -2  -6  -2    9.50   28.70
  -2   6   2   27.20   14.90
  -2   6   2    2.40   12.20
   2   6  -2   31.80    7.20
  -2   6  -2   20.10   18.70
   2  -6  -2  310.47  491.95
   2   6   2   47.30   12.30
   2   6   2   22.70   14.90
  -2  -6   2   25.60   22.10
  -2   6  -2   -8.60   16.70
  -3   6   2  151.98   32.70
   3   6  -2  147.79   24.60
   3   6  -2  149.39   26.00
   3   6  -2  155.88   25.10
  -3   6   2  111.69   26.10
   3   6   2  140.29   25.40
   3   6   2  146.09   24.60
   3   6   2  184.48   27.00
   3   6   2  147.39   24.50
  -3  -6   2  267.47   81.09
   4   6  -2  107.49   18.50
   4   6  -2  120.59   20.60
   4   6  -2  108.59   18.70
  -4   6   2   76.79   18.80
  -4   6   2  127.59   45.20
   4  -6   2   93.99   28.70
   4   6   2  114.09   18.30
   4   6   2  108.49   18.10
   4   6   2   94.19   19.90
   4  -6  -2   62.69   32.50
   4   6   2   99.19   20.50
   5   6  -2  430.66   66.89
   5   6  -2  497.35   67.49
   5  -6   2  493.05   71.99
   5   6  -2  400.56   67.49
   5   6   2  496.95   67.29
   5   6   2  421.06   66.09
   5  -6  -2  457.75   76.29
   5   6   2  401.66   69.69
   6   6  -2   40.60   10.60
   6  -6   2   44.00   18.30
   6   6  -2   18.90    8.00
   6  -6   2   49.70   18.80
   6   6  -2   26.70    7.10
   6   6   2   44.20   14.60
   6   6   2   47.60   10.30
   6  -6  -2   11.60   16.00
   6   6   2   33.20    7.60
   6  -6  -2   40.70   22.10
   6   6   2   24.50    9.00
   7  -6   2   44.50   17.50
   7   6  -2   44.80   10.70
   7  -6   2   71.59   17.20
   7  -6  -2   34.50   21.70
   7  -6  -2   30.80   17.40
   7  -6  -2   24.00   18.70
   7   6   2   28.40   13.60
   7   6   2   63.69   11.50
   8   6  -2   17.40   11.40
   8   6  -2   12.10    7.60
   8  -6   2    8.20   12.30
   8   6  -2   27.40    5.50
   8  -6   2   29.70   14.50
   8   6   2    1.80   11.60
   8  -6  -2   15.40   13.20
   8  -6  -2    7.00   17.20
   8  -6  -2   14.50   12.10
   9   6  -2   18.40    9.80
   9  -6   2    8.50    7.90
   9  -6   2   15.50   10.20
   9   6  -2    7.50    8.10
   9   6  -2   14.10    4.20
   9   6   2   11.30    5.60
   9   6   2    2.20   12.80
   9   6   2   11.30    3.50
   9  -6  -2   -0.70   12.60
   9  -6  -2   18.40   10.30
   0   7  -2  391.46   51.29
   0  -7  -2  355.66   57.89
   0  -7   2  359.66   61.49
   0   7   2  362.06   50.99
   0   7  -2  291.27   54.29
   0   7   2  337.97   53.19
   0   7   2  281.97   52.19
   1   7  -2  199.68   35.10
   1   7  -2  221.08   32.40
  -1  -7  -2  288.67   45.70
   1  -7   2  242.38   49.00
  -1   7   2  184.48   37.10
  -1   7   2  188.58   32.90
   1   7   2  191.58   38.10
   1   7   2  216.58   33.70
  -1  -7   2  226.08   49.99
   1   7   2  233.88   32.70
   1   7   2  197.58   34.70
  -1   7  -2  198.78   33.60
   1  -7  -2  168.18   43.10
  -2  -7  -2  107.29   31.10
  -2   7   2   46.30   11.60
   2   7  -2   43.20   10.60
   2   7  -2   73.29   17.10
   2   7  -2   45.20   13.10
  -2   7   2   69.79   23.70
  -2  -7  -2   19.90   41.40
   2   7   2   70.29   11.30
  -2  -7   2   43.00   33.50
   2   7   2   65.59   15.40
  -2  -7   2   86.69   35.50
   2   7   2   49.50   12.30
   2  -7  -2   16.70   20.80
   2  -7  -2   72.09   36.20
  -2   7  -2    4.70   24.30
   3   7  -2  139.29   24.20
   3   7  -2  152.58   22.90
  -3   7   2   97.39   21.90
  -3   7   2   70.39   31.60
  -3  -7  -2  236.28   50.39
   3   7  -2  149.19   22.30
   3   7   2  130.39   22.90
   3   7   2  136.79   24.60
  -3  -7   2  172.78   41.60
   3   7   2  132.09   23.90
   3   7   2  131.49   22.20
   4   7  -2  414.56   56.49
  -4   7   2  331.27   76.59
   4   7  -2  369.46   57.49
  -4  -7  -2  533.25   99.79
   4   7  -2  339.97   56.09
   4   7   2  364.76   56.19
   4   7   2  387.76   56.19
  -4  -7   2  527.35  105.79
   4   7   2  394.46   57.49
   4   7   2  362.66   57.19
   5  -7   2  185.98   37.50
   5   7  -2  169.48   27.10
   5   7  -2  179.88   27.90
   5   7  -2  167.48   29.40
   5   7   2  159.18   27.00
   5   7   2  153.38   27.50
  -5  -7   2  212.78   43.90
   5   7   2  191.18   29.10
   5   7   2  197.58   31.70
   6   7  -2   15.30    7.70
   6   7  -2   41.20   13.20
   6   7  -2   28.00    9.90
   6  -7   2   16.70   19.40
   6  -7   2   36.50   18.30
   6   7  -2   26.90    7.20
   6   7   2   30.40    7.70
   6  -7  -2   11.90   27.40
   6   7   2   31.50   12.90
   6   7   2   50.59   10.30
   6   7   2   40.60    7.80
   7   7  -2   57.29   21.30
   7   7  -2   18.70   10.40
   7  -7   2   11.20   16.90
   7  -7   2    4.20   20.90
   7  -7  -2    1.30   24.90
   7   7   2   26.90   12.20
   7  -7  -2   16.80   24.90
   7   7   2   12.50    9.60
   8   7  -2   16.50    6.50
   8  -7   2    9.90    9.80
   8   7  -2   12.90    7.50
   8  -7   2  -18.70   13.20
   8  -7  -2   32.60   23.30
   8  -7  -2   -3.70    9.30
   8   7   2    6.60    5.40
   8   7   2    7.90    3.20
   8   7   2   18.00    7.10
   9   7  -2   29.00    7.10
   9  -7   2   -1.60    7.80
   9  -7   2   12.20   10.80
   9   7  -2   37.20    7.40
   9   7   2   19.40    5.10
   9  -7  -2   16.20   11.40
   0   8  -2    6.10    6.70
   0   8  -2   -2.60   13.40
   0   8   2   12.20   10.90
   0  -8  -2    2.80   22.80
   0  -8   2   17.20   22.10
   0  -8   2    7.00   21.20
   0   8   2    4.60    8.80
   0   8  -2   12.20   11.00
   1  -8   2  123.79   33.30
   1   8  -2  110.69   27.50
  -1   8   2  142.39   29.70
   1   8  -2  154.28   30.20
   1   8   2  135.39   26.00
   1   8   2  182.28   27.70
  -1   8  -2  157.28   24.30
   1   8   2  106.89   27.80
  -1   8  -2  143.39   30.70
  -2   8   2  322.77   56.39
  -2  -8  -2  390.26   57.69
   2   8  -2  330.47   47.40
  -2   8   2  305.47   47.50
  -2  -8  -2  166.78   68.59
  -2  -8   2  340.27   60.89
   2   8   2  337.07   47.50
   2   8   2  278.07   48.30
   2   8   2  306.17   55.39
   3   8  -2  279.97   47.40
   3   8  -2  285.67   46.30
  -3   8   2  294.87   46.30
   3   8  -2  335.07   46.00
  -3   8   2  371.06   61.09
   3   8   2  351.96   48.30
  -3  -8   2  314.37   60.59
  -3   8  -2  223.48   56.99
   3   8   2  325.37   45.80
   3   8   2  289.77   46.80
   3   8   2  296.47   46.30
   4   8  -2   68.69   14.30
  -4   8   2   50.69   35.80
   4   8  -2   73.59   13.70
  -4   8   2   82.29   14.70
   4   8  -2   86.19   18.10
  -4  -8  -2  119.59   29.10
   4   8   2   71.19   15.30
   4   8   2   85.69   17.50
  -4  -8   2   33.90   27.20
  -4   8  -2   37.10   29.00
   4   8   2   89.89   18.60
   4   8   2   75.99   14.70
  -5   8   2    1.50   40.20
  -5  -8  -2   35.80   23.70
   5   8  -2   37.30    8.60
   5  -8   2   39.00   18.60
   5   8  -2   64.29   12.00
   5   8  -2   50.29    9.50
   5   8   2   74.89   14.20
  -5  -8   2   17.10   23.20
   5   8   2   40.60    8.50
   5   8   2   30.60    8.10
   6   8  -2   21.20   17.50
   6  -8   2   17.40   25.30
  -6  -8  -2   34.30   22.30
   6   8  -2    8.60    7.70
   6   8  -2   12.20    8.60
   6   8  -2   16.30   10.90
  -6  -8   2   -1.90   16.90
   6   8   2   17.10   10.40
   6   8   2   15.30    6.50
   6   8   2    5.90    6.30
   7  -8   2   -8.00    8.70
   7   8  -2    2.90    4.00
   7   8  -2   10.30    7.80
   7   8  -2    0.50    5.00
   7  -8   2   28.00   20.80
  -7  -8  -2   16.40   17.80
  -7  -8   2    1.30   13.80
   7   8   2    8.30    5.90
   7   8   2   12.60    4.00
   7   8   2   12.40    5.20
   7  -8  -2    5.20    9.70
   8  -8   2    7.30    7.10
   8   8  -2   11.70    6.60
   8   8  -2   13.10    5.80
   8   8  -2   16.50    3.60
   8   8   2   14.10    5.00
   8   8   2   13.10    3.70
   8  -8  -2    3.30    8.00
  -8  -8   2   11.10   16.10
   8   8   2   15.10    7.00
   0   9  -2  274.67   40.20
   0   9   2  307.67   46.90
   0   9  -2  230.28   48.20
   0  -9  -2  221.08   50.69
   0   9   2  268.27   39.70
   0   9   2  262.07   43.00
   1   9  -2   64.49   23.00
  -1  -9  -2   79.49   24.50
  -1   9   2   56.09   20.20
   1   9  -2   74.39   17.80
   1   9  -2   89.89   15.80
  -1   9   2   76.49   15.20
  -1   9  -2   32.50   21.90
  -1  -9   2   82.99   25.40
   1   9   2   92.99   19.80
  -1   9  -2  101.39   17.50
   1   9   2   96.09   15.00
   1  -9  -2   88.59   27.70
   2   9  -2   -0.30    6.00
  -2   9   2  -27.00   21.60
  -2   9   2   -0.30    6.20
  -2  -9  -2   -6.80   20.10
   2   9  -2   -5.90    8.90
  -2  -9   2    0.40   43.70
   2   9   2    0.70    5.30
  -2   9  -2   14.90   21.30
  -2  -9   2  -14.10   20.30
   2   9   2    6.60    7.60
   2  -9  -2  -28.30   24.50
  -2   9  -2    9.10   12.70
   2   9   2   -4.10   16.40
  -3  -9  -2   11.90   22.10
   3   9  -2   19.50    6.60
  -3   9   2   52.59   30.10
  -3   9   2   19.80    7.70
   3   9  -2    5.20    9.00
  -3   9  -2    0.70   21.40
   3   9   2   19.90   13.30
   3   9   2   18.00    6.10
  -3  -9   2   -3.50   19.80
   4   9  -2    4.70    8.30
  -4   9   2   -5.70   12.90
   4  -9   2   11.70   20.80
   4   9  -2    9.60    5.50
   4   9  -2   -3.20   10.10
  -4   9   2  -37.10   28.00
   4   9  -2   24.90   11.70
  -4  -9  -2   -4.80   21.50
   4   9   2    6.30    5.40
  -4  -9   2  -11.60   18.70
   4   9   2    1.80    9.20
  -4   9  -2   18.10   25.50
   4   9   2    2.50   10.10
   5   9  -2   14.70    5.50
  -5   9   2  -21.60   34.70
   5  -9   2   -1.00   12.70
  -5  -9  -2   16.70   18.60
   5   9  -2    8.10    7.40
   5   9  -2   12.10    9.40
   5   9   2    8.20    7.10
   5   9   2   17.30    5.70
  -5  -9   2   11.40   18.10
   5   9   2   19.70   10.20
   5   9   2    8.50    4.40
  -5   9  -2  -18.30   37.50
   6  -9   2   14.10    9.40
   6   9  -2   24.60    7.20
  -6  -9  -2   38.80   16.30
   6   9  -2   15.50    4.60
   6   9  -2   10.70    5.10
  -6  -9   2    4.00   11.70
   6   9   2    6.40    5.00
   6  -9  -2   10.90    8.90
  -7  -9  -2    4.80   11.80
   7  -9   2    3.00    6.90
   7   9  -2   19.20    4.70
  -7  -9   2    6.30   10.90
   7   9   2   10.90    3.40
   7  -9  -2    3.40    6.70
   7   9   2   10.80    8.30
   7   9   2    6.70    3.70
   0 -10   2   30.70   32.60
   0 -10   2   26.30   19.80
   0 -10  -2   19.00   22.40
   0  10   2   83.79   28.40
   0  10  -2   32.30   27.20
   0 -10  -2    5.70   35.80
   1  10  -2   49.10   10.00
  -1 -10  -2   33.40   22.90
  -1 -10  -2  -10.40   49.10
  -1  10   2   76.19   26.60
  -1  10   2   45.90    9.20
  -1 -10   2   24.10   41.50
   1  10   2   42.00    8.60
   1 -10  -2    3.90   26.20
  -1  10  -2   59.29   13.90
  -1  10  -2   34.20   29.90
   2  10  -2   27.10    7.60
   2 -10   2    3.00   39.20
  -2 -10  -2   28.80   22.20
  -2  10   2   19.10   30.20
  -2  10   2   37.10   11.40
  -2 -10   2  160.38   58.49
   2  10   2    1.10   17.10
  -2 -10   2    0.40   16.20
   2 -10  -2  -24.70   31.20
   2  10   2   21.10    6.40
  -2  10  -2    2.30   26.20
   3  10  -2   31.70   10.40
  -3  10   2   34.60   28.10
   3  10  -2   38.60    9.30
  -3  10  -2   -2.50   20.70
   4  10  -2   24.50    8.00
   4  10  -2   24.00    5.50
  -4 -10  -2   21.30   16.50
   4 -10   2   27.70   15.70
   4  10   2   28.80    9.70
   4  10   2   29.10    5.40
  -4 -10   2   -2.30   14.90
   5  10  -2    4.00    5.60
   5  10  -2    8.40    3.40
   5  10  -2    5.40    7.50
   5  10  -2   16.70    6.80
  -5 -10  -2   -8.80   11.80
   5 -10   2   13.30   11.00
   5  10   2    4.80    7.10
  -5 -10   2   -6.30   11.70
   5 -10  -2    2.20    9.40
   5  10   2   11.60    6.30
   5  10   2    6.20    3.10
   5  10   2   13.70    4.80
   6 -10   2   19.90    9.50
  -6 -10  -2   -7.30   12.50
   6  10  -2    3.40    3.80
   6  10  -2    0.60    4.50
  -6 -10   2   -3.80   10.20
   6  10   2   -1.10    3.80
   6  10   2    7.70    4.10
   6 -10  -2   14.00    9.80
   6  10   2    1.20    5.20
   0  11  -2   11.10    6.00
   0  11   2    2.90    4.00
  -1 -11  -2   36.90   18.80
   1  11  -2   20.80    6.10
  -1  11   2   13.70    5.10
  -1  11  -2   13.10    6.90
   1  11   2    8.50    4.10
  -2 -11  -2   -8.70   15.30
  -2  11   2    8.40    5.60
   2  11  -2   16.90    4.90
  -2 -11   2    1.90   13.00
   2  11   2   16.50    4.00
   3  11  -2   23.00    4.70
   3  11  -2   22.70    6.80
  -3 -11  -2   -7.60   13.10
  -3 -11   2   -1.40   12.70
   3  11   2   10.40    3.50
   4  11  -2   34.00    6.90
  -4 -11  -2   20.30   13.00
  -4 -11   2    3.30   11.10
   4  11   2   19.40    4.10
   4 -11  -2    1.10   12.00
   5  11  -2   15.00    5.10
  -5 -11  -2   -9.10   11.20
   5  11   2    4.70    4.30
   5  11   2   11.90    3.00
   5 -11  -2   31.40   12.60
  -5 -11   2   23.70   12.70
   0  12  -2   -2.00    6.30
   1  12  -2   17.70    4.20
  -1  12   2   21.10    5.30
   1  12  -2   18.00    7.20
   1  12   2    9.40    4.00
   2  12  -2    6.90    3.40
   2  12  -2   21.00    6.00
   2  12   2    7.10    5.10
   2  12   2   10.40    4.20
   0   0   3  -14.80    2.70
   0   0  -3  -14.00    2.60
   0   0   3  -11.80    5.30
   0   0  -3  -13.50    2.60
   0   0  -3  -15.10    8.50
   0   0   3   -3.30   22.30
   1   0   3  280.57   52.69
   1   0   3  354.96   46.60
  -1   0   3  386.46   85.39
  -1   0   3  287.97   47.00
   2   0   3   13.60   46.30
   2   0  -3   14.50    4.10
  -2   0   3   13.50    4.30
   2   0  -3   21.20    4.60
  -2   0  -3    6.90    4.90
  -2   0   3    0.60   98.59
  -2   0   3   24.50    6.00
  -3   0   3  470.95   66.39
   3   0  -3  458.25   65.19
  -3   0   3  392.56   65.69
   3   0   3  408.46  114.89
  -3   0   3  745.23  225.78
  -4   0   3  102.49   18.10
  -4   0   3   93.49   19.50
   4   0  -3   79.59   16.50
  -4   0  -3  191.88   57.19
  -4   0  -3  351.76  195.18
  -5   0   3  133.99   29.20
  -5   0   3   98.79   23.30
  -5   0  -3  143.19   24.50
  -5   0  -3  114.69   26.80
  -5   0  -3  266.17   87.49
  -6   0  -3   26.50  122.79
   6   0  -3   -2.40   14.60
   6   0   3   -5.60   13.70
  -6   0  -3   -2.50   17.80
   6   0   3   20.10   15.30
   6   0  -3   -3.70   12.60
   6   0   3   14.30   18.90
   7   0   3   -2.20   13.90
   7   0  -3    7.70   12.10
   7   0  -3   -0.80   14.20
   7   0   3    7.30   14.90
   7   0   3    1.90   12.10
   8   0   3   11.60   13.70
   8   0   3   -9.10   13.20
   8   0  -3    0.30   13.10
   8   0   3   -2.00   12.20
   8   0  -3   10.50   13.60
   9   0  -3  128.79   26.40
   9   0   3  115.29   26.60
  10   0   3   12.80    7.50
  10   0  -3    2.30   10.20
  10   0   3    8.40    9.10
  10   0  -3    8.70    8.60
  11   0  -3    3.50   10.60
   0   1  -3   94.49   17.90
   0  -1  -3  116.99   34.50
   0   1  -3   58.39   13.50
   0   1   3   71.19   11.60
  -1   1   3 1879.51  270.17
  -1   1   3 1741.33  269.47
  -1  -1  -3 1833.22  268.97
  -1   1  -3 1791.22  273.47
   1   1   3 2088.29  269.17
   1  -1  -3 1716.93  292.57
   2  -1   3 1878.11  321.57
  -2  -1  -3 2526.35  340.67
   2   1  -3 2058.89  322.97
  -2   1   3 1912.91  322.27
   2   1  -3 2349.96  321.97
   2  -1   3 2576.84  340.87
   2  -1  -3 2434.06  322.47
  -2  -1   3 2022.30  322.87
  -2  -1   3 2490.55  384.46
   2  -1  -3 2655.53  363.86
  -3  -1  -3  144.79   97.59
   3   1  -3   95.59   16.30
  -3   1   3  133.59   19.00
  -3   1   3  100.19   18.50
  -3   1   3  229.68  157.98
   3  -1   3   98.19   88.69
  -3  -1   3   98.29   19.40
   3  -1  -3  101.49   18.10
   3  -1  -3   13.10  122.19
  -3   1  -3  138.39   34.50
  -4  -1  -3  171.48   28.20
  -4   1   3  162.08   29.50
   4  -1   3  157.28  144.09
  -4  -1  -3  -67.69  185.38
  -4   1   3  172.58   29.40
   4  -1  -3  309.27  228.98
  -4   1  -3  178.78   27.60
  -4  -1   3  169.68   32.00
  -4   1  -3  239.38   57.19
   5  -1   3  410.56  270.47
  -5   1   3  822.22  112.99
  -5   1   3  631.74  112.09
  -5  -1   3  717.73  113.89
  -5   1  -3  784.92  110.99
  -5   1  -3  883.81  165.48
   6  -1   3   18.30   15.00
   6  -1   3   32.90   17.30
   6   1  -3   25.00   14.80
   6   1  -3   11.60   13.40
  -6   1   3  -26.60   24.20
   6   1  -3   14.60    8.40
   6   1   3   16.90    9.60
  -6   1  -3  -59.29  125.59
   6  -1  -3   16.60   18.20
   6  -1  -3   11.00   11.80
   6   1   3   39.10   21.30
   6   1   3   25.50   16.20
   6   1   3   20.90   13.90
   7   1  -3  349.57   63.29
   7  -1   3  381.66   62.59
   7  -1   3  408.86   61.39
   7  -1   3  462.45   63.29
   7   1   3  361.86   58.99
   7   1   3  354.46   61.79
   7  -1  -3  427.66   64.69
   7   1   3  462.85   60.79
   7   1   3  404.86   62.89
   7  -1  -3  423.96   66.19
   7  -1  -3  349.27   63.99
   8   1  -3    2.20    8.50
   8  -1   3   21.80   14.00
   8  -1   3   40.50   14.60
   8   1  -3   22.50   13.50
   8   1  -3   49.99   16.30
   8  -1  -3   39.20   16.80
   8   1   3   36.60   12.40
   8  -1  -3   33.20   14.00
   8   1   3    8.70   14.90
   8  -1  -3   31.80   17.30
   8   1   3   22.10    8.90
   8   1   3   10.60   12.00
   9  -1   3   48.60   13.40
   9  -1   3   61.69   14.80
   9  -1  -3   30.20   13.50
   9   1   3   48.60   17.80
   9   1   3   33.20   14.00
   9  -1  -3   60.59   17.20
   9   1   3   26.10   15.80
  10   1  -3   10.40   11.50
  10  -1   3    9.00    7.30
  10   1  -3    0.00    6.80
  10  -1   3    7.00    8.80
  10  -1  -3    7.00    9.90
  10   1   3    5.20    8.70
  10   1   3   26.30   13.90
  10  -1  -3   11.80    8.30
   0   2  -3  132.69   22.30
   0   2  -3  142.39   22.60
   0   2   3  139.39   21.70
   0   2  -3  136.09   26.80
   0  -2  -3  148.19   21.60
  -1   2   3  719.93  101.59
   1   2  -3  680.33  102.19
   1  -2  -3  770.02  101.59
  -1   2  -3  600.24  101.99
   2   2  -3  652.63   99.99
   2   2  -3  760.42   97.99
  -2   2   3  627.04   98.89
   2  -2   3  740.33   98.49
  -2  -2   3  679.53  102.89
  -2  -2   3  561.64  100.39
   3   2  -3  145.99   30.40
   3  -2   3  328.17  111.29
  -3   2   3  160.78   28.40
   3  -2   3  197.38   44.80
  -3  -2  -3  203.18  133.09
  -3   2   3  251.77   37.90
   3  -2  -3  171.38   35.80
  -3   2  -3  168.08   46.20
  -3  -2   3  141.99   30.80
  -3  -2   3  145.09   38.20
   3  -2  -3  195.18  163.38
   3  -2  -3  189.48   29.40
  -3   2  -3  213.58   27.40
   4  -2   3  587.44  190.08
  -4   2   3  526.55   82.89
  -4  -2  -3  797.72  257.37
  -4   2   3  578.04   82.69
  -4   2  -3  580.04   81.59
  -4  -2   3  579.74   83.59
  -4   2  -3  369.06  107.29
  -4  -2   3  535.15   83.19
   4  -2  -3   97.29  267.17
  -5  -2  -3  332.37   52.69
  -5   2   3  326.17   58.29
   5  -2   3  283.37  267.57
  -5   2   3  366.36   55.79
  -5   2  -3  269.57   95.59
   5  -2  -3  346.37  453.95
  -5   2  -3  347.57   54.19
   6  -2   3   98.89   22.30
   6   2  -3  118.99   25.50
   6  -2   3   93.79   18.90
   6   2  -3   70.69   15.90
   6   2  -3   56.89   17.30
   6   2   3   72.59   14.40
   6  -2  -3   65.49   17.80
   6  -2  -3   53.39   21.50
   6   2   3   79.89   16.80
   6   2   3   72.79   26.30
   6  -2  -3  109.89   24.80
   7  -2   3  181.98   37.20
   7   2  -3  144.69   30.00
   7  -2   3  140.39   30.20
   7  -2  -3  189.48   31.40
   7   2   3   82.59   34.30
   7   2   3   86.29   32.90
   7  -2  -3  231.38   43.60
   7  -2  -3  134.19   29.50
   8  -2   3   66.49   17.10
   8   2  -3  121.39   24.80
   8   2  -3   95.29   19.10
   8   2  -3   80.49   13.80
   8  -2  -3   52.79   20.20
   8   2   3  115.89   19.40
   8  -2  -3   57.39   16.70
   8   2   3   41.50   19.00
   8   2   3   80.59   14.10
   9  -2   3    1.10   11.10
   9  -2   3   -7.30   12.20
   9   2  -3   -0.90   12.30
   9   2   3   22.00   10.60
   9   2   3    3.40   11.40
   9   2   3    7.60    7.40
   9  -2  -3    3.40   11.00
   9  -2  -3   -4.70   14.20
   9  -2  -3   25.60   11.60
  10  -2   3   -1.00    6.60
  10  -2   3   -3.40    8.50
  10   2  -3   -3.10    6.50
  10   2  -3    5.50    9.50
  10  -2  -3    5.70    7.70
  10  -2  -3    1.30    8.40
   0  -3  -3  221.58   31.70
   0  -3   3  216.18   41.80
   0   3  -3  203.98   32.40
   0  -3   3  226.98   31.80
   0   3   3  192.58   31.90
   0   3  -3  190.58   34.20
  -1   3   3  312.57   45.20
  -1  -3  -3  337.07   45.40
  -1  -3  -3  267.87   48.60
   1   3  -3  290.57   44.90
   1  -3  -3  229.18   61.29
  -1   3  -3  264.17   58.09
  -1   3  -3  346.07   46.80
  -1  -3   3  381.16   56.39
   1   3   3  261.47   44.40
   1  -3  -3  325.97   47.40
   2   3  -3  170.18   27.30
  -2   3   3  132.59   22.90
   2  -3   3  156.58   23.40
  -2  -3  -3  146.09   24.50
   2   3  -3  135.99   21.60
   2  -3  -3  133.49   26.00
  -2  -3   3  156.98   37.70
  -2   3  -3  143.29   41.90
  -2   3  -3  143.99   28.90
   2  -3  -3  140.49   47.10
   2  -3  -3  469.35  163.78
  -3  -3  -3  547.45   81.99
  -3  -3  -3  759.12  255.37
  -3  -3   3  653.43  101.89
  -3   3  -3  562.04  102.99
  -3  -3   3  472.25   83.99
   4  -3   3  548.15  240.88
  -4   3   3  652.43   90.29
  -4   3   3  541.65   91.09
  -4   3  -3  577.84   89.09
   4  -3  -3 1006.10  389.46
   5  -3   3  184.18   30.00
   5  -3   3  514.45  374.96
  -5  -3  -3  147.19  115.29
   5   3  -3  139.49   23.70
   5  -3   3  168.18   35.20
   5  -3  -3  166.08   31.00
   5   3   3  158.18   26.50
   5  -3  -3  130.59   32.40
  -5   3  -3  -27.20   91.99
   5   3   3  135.79   24.00
   6   3  -3   52.19   14.50
   6   3  -3   60.79   17.00
   6  -3   3   94.09   21.50
   6   3  -3   57.79   12.10
   6  -3   3   57.79   16.40
   6  -3  -3   71.99   17.50
   6   3   3   79.29   12.70
   6   3   3   60.09   25.60
   6   3   3   42.00   18.80
   6   3   3   58.19   14.30
   6  -3  -3   59.49   22.80
   7  -3   3  305.27   49.30
   7  -3   3  296.37   46.20
   7   3  -3  260.47   45.90
   7   3  -3  254.67   46.20
   7   3  -3  305.77   43.50
   7  -3  -3  270.37   52.79
   7   3   3  305.07   43.60
   7   3   3  303.67   44.50
   7  -3  -3  244.58   46.60
   7  -3  -3  332.37   48.30
   8  -3   3   64.49   17.10
   8   3  -3   53.59   16.00
   8   3  -3   79.39   13.10
   8   3  -3   65.59   17.00
   8  -3  -3   76.99   18.00
   8  -3  -3   56.19   16.40
   8   3   3   72.59   15.20
   8   3   3   70.69   14.90
   9  -3   3   -5.80   14.40
   9   3  -3    1.30    5.20
   9  -3   3   -0.70   14.10
   9   3  -3   20.60    9.50
   9   3   3    2.90    6.80
   9  -3  -3    0.70   10.30
   9   3   3   14.70   13.20
   9  -3  -3  -12.00   12.60
   9  -3  -3   -3.90   12.40
  10  -3   3    7.60    7.50
  10  -3   3   15.70    8.10
  10   3  -3   13.40    9.10
  10   3  -3    2.30    7.40
  10  -3  -3    2.60    7.80
  10  -3  -3   22.60    8.90
  10   3   3    7.80    9.90
   0  -4   3  981.20  148.59
   0  -4  -3 1024.60  137.29
   0  -4   3  802.82  136.79
   0   4  -3  963.30  137.09
   1  -4   3  175.08   25.60
   1   4  -3  154.98   24.40
  -1   4   3  138.79   24.90
  -1  -4  -3  136.19   32.90
   1  -4  -3   94.79   58.09
  -1  -4   3  182.48   26.90
  -1  -4   3  241.28   52.99
  -1   4  -3  206.58   28.20
  -1   4  -3  116.59   38.60
   1   4   3  146.89   25.00
   1  -4  -3  546.55  190.58
   2   4  -3  173.68   24.20
  -2  -4  -3  157.78   26.80
   2  -4   3  149.59   26.40
  -2   4   3  133.79   25.80
  -2  -4   3  191.88   62.89
   2  -4  -3  622.54  244.18
  -2  -4   3  191.18   30.70
  -2   4  -3  176.68   33.80
   2  -4  -3  147.49   80.49
  -2   4  -3   82.69   51.79
   2  -4  -3  173.58   30.80
   3  -4   3  296.97  270.57
  -3   4   3   58.29   13.20
   3  -4   3   34.50   10.10
  -3  -4   3    4.60   19.70
   3  -4  -3   32.00  273.27
  -3  -4   3   36.40   79.99
  -3   4  -3   32.80   59.19
   3  -4  -3   41.90   12.70
  -3   4  -3   69.99   12.60
  -4   4   3   86.39   24.00
   4  -4   3   -9.90  343.17
   4  -4  -3   38.10  463.65
  -4   4  -3  -17.20   84.49
  -4  -4   3   81.89   33.70
   5   4  -3  234.48   33.20
   5   4  -3  228.18   35.70
   5   4  -3  213.78   36.80
   5  -4   3  210.08   43.80
   5  -4   3  248.68   37.70
   5   4   3  166.68   44.00
   5   4   3  229.78   35.10
   5   4   3  200.88   42.60
   5   4   3  209.18   33.30
   5  -4  -3  151.58   42.30
   5  -4  -3  228.98   41.30
   6   4  -3   95.59   17.30
   6  -4   3   66.79   21.00
   6   4  -3   95.29   14.90
   6  -4   3   79.79   18.90
   6   4  -3   79.69   20.00
   6   4   3   96.99   18.20
   6  -4  -3   76.59   22.10
   6   4   3  105.99   18.80
   6   4   3   47.40   25.60
   6  -4  -3   53.99   19.00
   6   4   3   85.29   15.00
   7   4  -3   62.49   14.90
   7  -4   3   80.49   17.70
   7   4  -3   57.59   15.50
   7  -4   3   34.30   17.40
   7   4  -3   75.29   13.50
   7   4   3   56.69   13.10
   7  -4  -3   55.79   17.40
   7   4   3   78.49   13.20
   7  -4  -3   31.10   19.60
   7   4   3    9.40   22.20
   7  -4  -3  109.89   23.00
   8  -4   3   -2.90   10.20
   8  -4   3   26.30   13.10
   8   4  -3    1.10   12.10
   8   4  -3   25.30   13.20
   8   4  -3   27.30    7.10
   8   4   3   21.10   26.60
   8  -4  -3   30.50   13.80
   8  -4  -3    5.90   15.20
   8  -4  -3   21.50   15.30
   8   4   3    5.60   12.00
   8   4   3   16.90    6.40
   8   4   3   11.10    8.70
   9   4  -3   33.70   11.50
   9  -4   3   35.90   12.00
   9  -4  -3   14.20   11.20
   9   4   3   56.59   10.20
   9  -4  -3   13.70   10.90
  10   4  -3   12.70    5.30
  10  -4   3    7.70    6.30
  10   4  -3    9.40    8.00
  10  -4   3    6.10    8.30
  10   4   3   -0.40    4.80
  10  -4  -3    1.90   12.10
  10   4   3   14.10    7.10
  10  -4  -3   19.00    8.30
   0  -5   3  263.57   36.20
   0   5   3  190.28   35.40
   0  -5  -3  234.38   40.70
  -1   5   3  105.69   22.00
  -1  -5  -3  167.18   30.70
   1   5  -3  146.79   20.90
   1  -5   3  107.99   23.10
   1   5  -3  125.79   21.20
  -1  -5   3  129.19   25.20
   1  -5  -3  501.85  277.67
  -1   5  -3  176.18   25.60
  -1   5  -3   86.89   55.89
   2  -5   3  157.18   27.10
  -2   5   3  142.99   28.00
   2  -5  -3 1129.29  391.76
  -2   5  -3   53.09   71.79
  -2   5  -3  212.48   33.00
  -2  -5   3  183.08   34.30
   2  -5  -3  144.89   32.50
  -3   5   3  176.98   31.70
   3  -5   3  395.06  508.55
  -3   5  -3  157.08   29.30
   3  -5  -3  214.88  475.25
   3  -5  -3   89.79   26.20
  -3   5  -3   70.99   90.49
  -3   5  -3  125.39   29.20
  -4   5   3   50.69   28.90
   4   5  -3  111.09   24.60
  -4   5   3  197.78   47.30
   4  -5   3   71.59   24.70
   4   5  -3   87.29   17.60
   4   5  -3  107.39   21.00
   4   5  -3  112.89   17.90
   4   5   3   97.09   20.50
   4   5   3  113.39   19.40
   4   5   3   87.99   17.00
   4   5   3  102.99   21.20
   5   5  -3  107.29   20.70
   5  -5   3   84.39   22.20
   5  -5   3  130.49   23.50
   5   5  -3   74.89   15.30
   5   5  -3   91.19   16.10
   5   5  -3   85.39   21.60
  -5   5   3  133.89   47.30
   5   5   3   87.29   21.80
   5  -5  -3  138.79   33.50
   5   5   3   99.09   17.00
   5   5   3   50.39   34.90
   5   5   3   95.19   18.60
   5  -5  -3   46.30   21.40
   5   5   3   79.79   15.90
   5   5   3  114.99   19.00
   6  -5   3  204.48   35.10
   6   5  -3  191.28   28.30
  -6   5   3  281.27   52.89
   6  -5   3  143.79   36.70
   6   5  -3  220.78   33.70
   6   5  -3  201.68   31.20
   6   5   3  177.78   29.70
   6  -5  -3  180.88   39.50
   6   5   3  211.98   36.00
   6  -5  -3  130.49   34.20
   6   5   3  180.08   28.50
   6   5   3  148.29   36.60
   7   5  -3  123.89   23.70
   7   5  -3  149.19   26.40
  -7   5   3  177.48   46.90
   7  -5   3  122.79   25.90
   7   5  -3  133.09   20.70
   7   5   3  132.79   20.70
   7  -5  -3   78.99   28.00
   7   5   3  103.09   24.30
   7  -5  -3  170.88   32.50
   7  -5  -3   93.09   25.90
   7   5   3  136.09   22.30
   8   5  -3   10.30    5.60
   8  -5   3    6.30   11.50
   8   5  -3   -2.00   13.70
   8   5  -3   19.70   14.20
   8  -5   3   16.40   14.70
   8  -5  -3   22.50   19.10
   8  -5  -3    7.70   17.00
   8  -5  -3   29.20   18.40
   8   5   3   17.60    8.70
   8   5   3   21.90   10.50
   8   5   3    4.00    6.00
   9  -5   3   52.49   12.40
   9   5  -3   21.00    9.10
   9   5  -3   38.60   12.20
   9  -5   3   23.50    8.80
   9  -5  -3   24.80   10.20
   9  -5  -3    7.00   12.60
   9  -5  -3   29.60   11.30
  10  -5   3    7.10    5.70
  10   5  -3   -0.30    6.00
  10   5  -3    3.80    5.50
  10  -5   3    6.70    8.40
  10   5   3    1.90    5.90
  10  -5  -3    9.20    9.20
  10   5   3   -3.20    3.30
   0  -6  -3  -13.90   19.10
   0   6   3   -2.10   11.30
   0  -6   3    6.10   11.90
   0   6  -3    4.10    8.50
   0   6   3    6.30    6.10
  -1   6   3   17.00    8.20
   1  -6   3    5.00   11.40
  -1  -6  -3   40.80   24.00
  -1   6   3    0.20   12.30
   1   6  -3   20.70    7.00
   1  -6  -3  258.77  434.86
   1   6   3   34.70    7.50
  -1  -6   3    4.20   13.80
  -1   6  -3    6.40   12.50
  -1   6  -3    3.20   13.50
  -1   6  -3  -14.40   78.49
  -2   6   3  132.49   25.30
  -2  -6  -3   65.79   51.19
   2   6  -3  117.09   22.80
   2   6  -3   80.49   17.80
  -2   6   3   99.39   19.10
   2   6  -3  141.79   19.90
  -2   6  -3   95.79   26.50
   2   6   3  109.19   19.90
  -2   6  -3  100.89   25.80
   2   6   3  126.59   19.40
   2  -6  -3   74.59   27.80
  -3   6   3   45.20   14.40
  -3   6   3   31.90   23.10
   3   6  -3   85.59   14.00
   3   6  -3   67.59   13.20
   3  -6   3   40.30   24.80
   3   6  -3   95.09   19.20
   3   6   3  -24.10   37.90
   3   6   3   74.59   13.20
   3  -6  -3   21.40   27.30
  -3   6  -3   69.09   27.40
  -3  -6   3  141.09   46.10
   3   6   3   73.69   14.50
   3   6   3   83.59   13.80
   3   6   3   81.69   15.60
   4  -6   3   22.50   21.40
   4   6  -3   45.00   10.00
   4   6  -3   61.49   13.50
   4   6  -3   44.40   10.50
  -4   6   3   34.00   12.10
   4   6  -3   79.69   16.20
  -4   6   3  100.49   49.10
   4   6   3   42.00   12.00
   4   6   3   50.59   38.40
  -4  -6   3  142.19   55.29
   4  -6  -3   26.40   15.70
   4  -6  -3  -22.00   27.20
   4   6   3   54.99    9.80
  -4   6  -3   90.39   38.10
   4   6   3   42.50   10.10
   5   6  -3   24.00   13.40
   5   6  -3   -9.40    6.40
   5   6  -3   12.60   10.00
   5  -6   3   -5.70   17.60
   5   6  -3    9.20    5.50
   5  -6   3    6.60   19.10
   5   6   3   -3.20    7.70
   5   6   3    7.30   14.30
   5  -6  -3   -4.50   13.40
   5   6   3   -1.30    9.10
   5   6   3   -6.40    5.90
   5   6   3    4.10   31.70
   6  -6   3    5.70   16.60
   6   6  -3   25.80   10.60
   6  -6   3    4.10   16.30
   6   6  -3   17.60    6.00
   6   6  -3   10.60   12.40
   6   6   3   16.70    8.80
   6   6   3   14.30   14.40
   6  -6  -3   -9.80   14.40
   6  -6  -3  -15.20   21.80
   6   6   3   17.30    8.60
   6   6   3    3.10    5.60
   7   6  -3   33.30   11.00
   7   6  -3   46.00    8.50
   7   6  -3   64.69   15.70
   7  -6   3   16.60   16.20
   7  -6   3    5.90   15.20
   7   6   3   51.39   10.80
   7  -6  -3   15.10   22.90
   7   6   3   34.50    8.30
   7   6   3   58.19   15.40
   7  -6  -3   25.10   18.70
   8   6  -3   21.50    5.00
   8   6  -3   21.20   10.60
   8  -6   3    8.40   10.30
   8  -6   3    9.20   11.30
   8   6  -3   23.80    7.10
   8  -6  -3    4.50   12.90
   8   6   3   11.40    7.20
   8   6   3    9.60    4.10
   8  -6  -3   30.20   19.10
   8  -6  -3   -0.60   11.20
   8   6   3   17.70    8.80
   9   6  -3   32.40    9.40
   9  -6   3   -4.10    6.60
   9  -6   3   11.10    8.50
   9   6  -3   -5.50    6.70
   9   6  -3    7.00    3.60
   9   6   3    6.80    2.80
   9   6   3    4.80    5.10
   9  -6  -3   40.20   17.10
   9  -6  -3    4.00    9.70
   0   7  -3   -0.60   10.00
   0   7  -3    7.90   13.80
   0   7   3    5.00    6.90
   0  -7  -3   -0.40   19.30
   0  -7   3  -10.00   22.30
   0   7   3    6.00    7.70
   0  -7   3   18.80   23.30
   0   7  -3    5.90    8.20
   0   7   3    2.90   11.10
   1   7  -3   30.90    8.80
   1  -7   3   39.00   27.20
   1   7  -3   13.00   12.10
  -1   7   3   12.70   11.60
   1  -7   3   -5.50   17.60
  -1  -7  -3   17.10   38.70
  -1  -7  -3   44.00   23.20
   1   7  -3   24.40   10.20
  -1   7   3   33.60    8.90
   1   7   3   40.90   11.60
   1  -7  -3   29.00   21.20
   1   7   3   36.90   10.60
  -1  -7   3   39.10   28.10
   1   7   3   38.70    8.50
  -1   7  -3   25.00   11.20
  -1   7  -3   34.20   18.10
  -2  -7  -3  285.47   49.70
  -2   7   3  201.88   38.60
   2   7  -3  202.38   30.20
   2   7  -3  170.28   34.20
  -2  -7  -3   76.59   53.59
   2   7  -3  166.18   31.80
  -2   7   3  161.08   30.20
   2   7   3  194.68   29.60
   2   7   3  170.28   31.00
   2   7   3  233.38   32.50
   2  -7  -3  204.08   46.90
  -2  -7   3  271.87   55.69
   2   7   3  199.18   36.80
  -3   7   3  135.49   25.40
  -3   7   3   95.29   33.50
  -3  -7  -3  257.77   51.79
   3   7  -3  171.38   27.30
   3   7  -3  144.69   25.20
   3   7  -3  164.58   24.80
  -3   7  -3   91.89   36.10
   3   7   3   85.89   40.60
   3   7   3  164.88   25.30
   3  -7  -3   51.29   48.70
   3   7   3  184.08   28.50
   3   7   3  146.69   24.50
   3   7   3  166.88   26.20
  -4   7   3   65.19   14.30
   4   7  -3   98.69   19.20
  -4   7   3  124.89   42.50
  -4  -7  -3   79.79   34.70
   4   7  -3   76.49   15.00
   4  -7   3   59.79   29.60
   4   7  -3   77.49   13.60
   4   7   3   77.49   14.30
  -4  -7   3   77.09   34.10
   4   7   3   80.19   17.60
   4   7   3   56.49   12.90
   4  -7  -3  121.29   40.50
   4   7   3   80.59   17.10
  -4   7  -3   36.50   35.50
   5   7  -3  183.78   28.20
   5  -7   3  219.58   37.40
   5   7  -3  166.38   27.60
  -5   7   3  155.68   28.50
   5   7  -3  196.78   30.30
   5   7   3  195.38   32.20
   5   7   3  186.88   27.60
  -5  -7   3  130.99   39.80
   5   7   3  152.58   27.70
   5   7   3  163.68   29.80
   5   7   3  208.18   29.40
   6   7  -3    2.20    8.40
   6  -7   3   17.50   16.60
   6  -7   3  -10.00   17.40
   6   7  -3   19.60   11.70
   6   7  -3   11.70    5.80
  -6  -7   3   -7.90   25.10
   6   7   3    4.20    7.40
   6   7   3   -2.40    5.90
   6   7   3    3.40    5.00
   6   7   3   18.10   11.80
   7  -7   3    5.40   16.50
   7   7  -3   53.09    8.60
   7   7  -3    6.70   10.10
   7  -7   3   11.80   16.10
   7  -7  -3   40.90   25.90
  -7  -7   3   34.20   24.00
   7   7   3   27.70    9.00
   7   7   3   33.50    9.00
   7  -7  -3   27.40   17.50
   7   7   3   29.20    9.70
   8   7  -3   -5.60    7.10
   8   7  -3    8.80    3.80
   8  -7   3  -14.10   11.10
   8   7  -3    9.30    5.80
   8  -7   3    2.30    9.90
   8   7   3    5.70    2.90
   8   7   3   -1.00    8.50
   8  -7  -3    2.40    9.60
   8  -7  -3   21.00   34.80
   8   7   3   -2.40    4.10
   9  -7   3   -1.20    6.40
   9  -7   3    4.50    9.00
   9   7  -3    0.60    6.60
   9   7  -3   -1.00    2.60
   9  -7  -3   14.90    8.50
   9   7   3    1.30    2.10
   9   7   3   -0.40    3.10
   0   8   3  412.86   56.99
   0  -8  -3  345.87   68.29
   0   8   3  381.16   57.69
   0   8   3  350.76   58.09
  -1   8   3   89.79   16.10
  -1  -8  -3   98.99   24.80
   1   8  -3  110.49   17.50
   1   8  -3   72.79   21.30
   1   8  -3   74.19   18.00
   1  -8  -3   27.90   30.70
  -1   8  -3   65.99   16.80
   1   8   3   95.19   15.30
  -1  -8   3   59.29   33.20
  -1  -8   3  101.99   29.30
  -2  -8  -3   93.59   27.10
  -2   8   3   67.79   12.00
   2   8  -3   53.89   11.50
  -2   8   3   50.29   21.50
   2   8  -3   43.10   13.40
   2   8   3   74.29   13.70
   2  -8  -3    9.70   26.60
  -2   8  -3   22.90   21.80
   2   8   3   98.59   19.70
  -2  -8   3   40.90   27.10
   2   8   3   81.39   12.00
  -2  -8   3   10.20   38.70
   3   8  -3   59.69   12.10
   3   8  -3   47.40   13.30
  -3   8   3   53.59   31.40
  -3   8   3   56.39   11.90
   3   8  -3   69.29   11.20
  -3  -8  -3   57.59   26.60
  -3  -8   3   69.89   29.60
   3   8   3   56.49   12.90
   3  -8  -3   22.10   27.70
  -3   8  -3   31.50   26.00
   3   8   3   63.39   16.00
   3   8   3   52.09   10.60
   4   8  -3   89.79   19.80
   4  -8   3  136.69   28.40
  -4   8   3   30.60   38.60
  -4   8   3  105.59   19.30
   4   8  -3   68.29   17.10
  -4  -8  -3  119.09   30.40
   4   8  -3  108.19   16.40
   4   8   3   83.79   16.60
   4   8   3  122.09   18.50
  -4  -8   3   79.59   28.40
   4   8   3   74.79   17.80
  -4   8  -3    9.60   31.70
   4   8   3   86.49   15.90
  -5  -8  -3  -10.60   22.20
   5  -8   3    8.20   24.40
   5   8  -3    3.30    8.60
   5   8  -3    8.60    5.40
  -5   8   3    4.90    9.00
   5   8  -3   22.20   12.40
   5   8  -3    7.20    5.90
  -5   8   3  -26.20   43.10
   5  -8   3  -13.10   16.20
   5   8   3    8.00    9.00
   5   8   3    3.00    5.50
   5   8   3    5.90    5.40
  -5  -8   3   10.20   20.00
   5   8   3    8.20    8.10
   6  -8   3   24.80   16.80
   6   8  -3   62.79   11.70
  -6  -8  -3   46.60   20.60
   6   8  -3   52.19   19.70
   6  -8   3   11.90   20.50
   6   8   3   36.70   17.00
   6   8   3   52.39   11.80
   6   8   3   55.49   10.70
  -7  -8  -3   25.30   17.40
   7   8  -3    7.60    3.80
   7  -8   3   -2.20    8.20
   7   8  -3    2.40    7.90
   7   8  -3    5.90    5.10
   7  -8   3   14.10   19.00
   7   8   3    5.30    5.00
   7   8   3   -1.10    6.10
   7  -8  -3  -17.60    9.50
  -7  -8   3   -9.70   12.50
   7   8   3   -1.10    2.90
   8  -8   3  -13.10    6.20
   8   8  -3    4.90    5.90
   8   8  -3   -6.20    6.30
   8   8  -3   -0.90    2.80
   8  -8   3   38.10   21.80
   8   8   3    5.50    3.90
  -8  -8   3    8.70   13.40
   8  -8  -3   -3.10    8.30
   8   8   3   -1.90    2.60
   0  -9  -3  -23.80   33.30
   0   9  -3   17.80   17.50
   0   9   3   11.40   10.70
   0  -9   3    9.20   20.10
   0   9   3   14.80    6.10
   0   9  -3    6.80    8.60
   0   9   3   23.10   14.50
   0  -9  -3  -17.90   22.70
   0  -9   3   25.90   24.80
  -1  -9  -3  192.58   43.90
  -1   9   3  188.58   30.00
  -1   9   3  228.38   39.30
   1   9  -3  165.38   40.70
   1   9  -3  202.28   30.30
  -1   9  -3  223.38   32.80
   1  -9  -3  193.48   41.20
   1   9   3  207.38   29.70
   1   9   3  166.88   32.20
  -1  -9   3   59.49   55.89
  -2   9   3   64.19   10.60
  -2  -9  -3   81.19   25.80
   2   9  -3   46.00   10.10
   2   9  -3   47.40   12.90
  -2   9   3   54.19   23.20
   2   9   3   40.20   11.60
  -2  -9   3   47.10   24.20
   2   9   3   76.89   25.30
   2   9   3   57.79   11.10
  -2  -9   3  -13.80   60.89
  -3   9   3   41.70   38.40
  -3  -9  -3   52.89   22.50
   3   9  -3   39.00   11.90
   3   9  -3   63.79   11.50
   3  -9   3 -123.09   75.69
  -3   9   3   50.89    9.90
   3   9   3   43.90    9.10
   3   9   3   36.20   10.70
   3  -9  -3   57.59   41.70
  -3  -9   3   36.70   20.60
   3   9   3   70.79   17.60
  -4  -9  -3  178.68   36.90
   4   9  -3  194.48   26.10
   4   9  -3  131.09   27.50
   4   9   3  186.18   29.70
   4   9   3  152.48   25.50
  -4  -9   3  158.18   39.80
   5  -9   3   31.20   14.40
  -5  -9  -3   22.80   20.20
   5   9  -3    9.50    5.70
  -5   9   3  -35.10   34.20
   5   9  -3   14.60    7.10
   5   9   3   11.10    5.40
   5   9   3   23.60    4.90
  -5  -9   3   15.20   16.50
   5   9   3   24.40    7.80
  -6  -9  -3   34.10   15.50
   6   9  -3    2.00    7.00
   6  -9   3   -5.30    8.60
   6   9  -3    8.00    4.10
   6   9  -3   14.30    5.10
   6   9   3   -1.00    4.70
   6   9   3    2.30    3.50
   6   9   3   14.70    8.20
  -6  -9   3   -4.00   11.70
   6  -9  -3   -4.80    8.60
   6   9   3   -2.20    3.20
   7   9  -3   -4.20    4.10
   7   9  -3   15.90    6.30
  -7  -9  -3   -6.00   12.20
   7   9  -3    1.50    3.50
   7  -9   3    7.20    6.60
   7  -9  -3    2.70    7.40
   7   9   3    6.60    4.30
   7   9   3    6.70    4.10
   7   9   3   10.60    5.70
  -7  -9   3    7.90   10.40
   0 -10  -3    0.00   36.20
   0  10   3   24.60    6.90
   0  10  -3   36.20   10.70
   0 -10   3    7.90   20.70
   0 -10  -3   17.70   24.60
   0 -10   3   57.39   34.90
   0  10  -3   30.90   27.20
  -1 -10  -3   26.20   21.30
  -1  10   3   39.30    8.70
  -1 -10  -3  -32.90   55.59
   1  10  -3   38.80    9.80
  -1  10  -3   28.70   30.90
   1  10   3   57.19   10.10
  -1 -10   3   40.60   40.80
  -1  10  -3   66.99   15.80
   1 -10  -3    4.20   25.40
   2 -10   3  -52.09   44.80
  -2 -10  -3 -160.88   79.89
  -2 -10  -3   29.00   25.10
  -2  10   3   11.70   10.10
  -2  10   3   70.49   29.90
  -2  10  -3   42.20   23.50
  -2 -10   3   37.70   52.09
  -2 -10   3   24.00   19.80
   2 -10  -3   12.20   30.70
  -3  10   3   11.80   26.40
   3  10  -3   31.50    6.50
  -3 -10  -3   31.40   23.30
   3  10  -3   30.70    9.70
  -3 -10   3   10.80   18.00
   3  10   3   20.00    6.20
   3  10   3   43.00   13.10
  -3  10  -3    2.30   23.10
   4  10  -3    5.30    3.90
  -4 -10  -3   13.20   16.70
   4  10  -3   11.50    7.70
  -4  10   3    1.10    6.90
   4  10  -3    1.30    5.60
   4  10   3   -4.00    7.50
  -4 -10   3   -1.90   11.60
   4  10   3   10.30    4.70
   4  10   3    6.00    3.40
  -5 -10  -3   39.70   14.80
   5 -10   3   29.10   16.40
  -5 -10   3   16.40   11.70
   5  10   3   47.20    9.40
   5  10   3   35.80    7.00
   5 -10  -3   39.70   12.20
   6  10  -3    6.30    5.60
  -6 -10  -3   -3.10   11.60
   6  10  -3   -5.30    5.70
   6 -10  -3   -6.80    8.00
   6  10   3   -1.00    4.40
   6  10   3    1.70    4.30
   0  11  -3    0.50    5.90
   0  11   3   -6.20    3.30
  -1  11   3   16.20    4.70
   1  11  -3    8.00    5.40
  -1 -11  -3    8.20   20.30
   1  11   3    9.40    3.80
  -1 -11   3    9.50   16.20
   2  11  -3   28.60    6.20
  -2 -11  -3   14.10   16.20
   2  11  -3   26.10    8.80
  -2  11   3   27.90    6.50
  -2 -11   3   12.90   13.60
   2  11   3   25.30    5.20
   3  11  -3   37.20    6.70
  -3  11   3   26.20    8.10
  -3 -11  -3   11.20   14.60
   3  11   3   37.70    6.10
  -4 -11  -3   36.50   13.40
   4  11   3   46.90    7.30
   4 -11  -3   26.40   12.50
   0  12  -3   -3.20    7.60
   0  12   3   11.30    4.00
   1  12  -3   15.30    7.00
   1  12   3   17.80    5.00
   2  12  -3    4.00    5.90
   2  12   3    6.00    4.00
   0   0   4  273.97   57.79
   0   0  -4  230.38   36.30
   1   0   4  733.63  113.29
  -1   0   4  863.81  113.59
  -1   0   4  678.13  147.69
   1   0  -4  685.63  114.29
   1   0  -4  851.81  115.69
  -2   0   4  567.74   88.89
   2   0  -4  656.03   90.09
   2   0  -4  572.04   88.59
  -2   0   4  855.31  180.28
  -3   0   4  619.84  237.18
  -3   0   4  443.76   69.79
   3   0  -4  482.25   69.09
   4   0  -4  271.97   38.00
  -4   0   4  248.48   39.60
  -4   0   4  183.38   38.80
  -5   0  -4  361.86  120.19
  -5   0   4  190.38   37.10
  -5   0  -4  153.98   31.20
   6   0   4  290.27   44.10
   6   0   4  201.88   39.00
   6   0  -4  224.88   40.80
   6   0   4  239.68   43.10
   6   0  -4  231.18   41.60
   7   0   4   -7.90   12.40
   7   0   4   -0.20   11.60
   8   0  -4  238.28   37.90
   8   0   4  232.18   35.20
   8   0   4  176.48   36.20
   8   0   4  197.58   36.80
   9   0  -4  113.19   27.10
   9   0   4   95.29   22.80
   9   0   4   89.09   17.90
  10   0  -4   -7.00   10.60
  10   0   4    8.00    6.70
  10   0   4   20.30    8.80
  10   0  -4   -8.40    7.60
   0  -1  -4   50.09   12.20
   0   1   4   50.29    7.90
   0   1  -4   40.80   10.10
   0  -1  -4   34.80   38.50
   0  -1  -4   28.70    8.60
   0   1  -4   44.80    8.90
  -1   1   4  350.26   51.09
   1   1  -4  359.16   50.99
   1   1  -4  311.47   51.09
  -1   1  -4  325.57   53.19
   1  -1  -4  324.17   51.89
  -1  -1   4  385.86   51.89
   2  -1   4  897.21  114.29
   2   1  -4  752.42  115.99
  -2  -1   4  886.01  194.68
   2  -1  -4  786.72  115.29
   2  -1  -4  854.61  181.08
  -2  -1   4  676.83  115.59
   3  -1   4  403.66  118.09
  -3   1   4  804.62  220.88
   3   1  -4  359.66   59.29
  -3   1   4  334.67   57.39
   3   1  -4  410.56   56.19
  -3  -1   4  550.34  248.48
  -3  -1   4  395.26   58.29
   3  -1  -4  302.47  171.58
   4   1  -4  689.63   98.19
  -4   1   4  641.24  100.19
   4  -1   4  761.22  203.88
  -4  -1   4  666.73  101.19
   4  -1  -4  652.43  274.37
  -5   1   4   31.70   18.40
  -5  -1  -4   31.50   12.90
  -5  -1  -4  158.58  103.79
  -5   1   4   38.70   18.90
  -5   1  -4  117.29   93.59
  -5  -1   4   11.40   20.70
  -5   1  -4   55.89   13.50
   6   1  -4   18.90   10.20
   6  -1   4   55.69   16.40
   6   1  -4   33.20   16.20
   6  -1   4   28.40   16.10
   6   1  -4   29.50   13.40
   6  -1   4   62.19   19.90
   6  -1  -4   44.10   14.40
   6   1   4   67.39   19.60
   6   1   4   50.19   13.10
   6   1   4   40.30   21.50
   6   1   4   49.99   11.20
   6  -1  -4   28.10   16.70
   7  -1   4   48.90   17.80
   7  -1   4   43.40   22.00
   7   1  -4   16.00   14.10
   7   1  -4   41.30    9.10
   7  -1   4   51.69   14.80
   7  -1  -4   22.80   17.30
   7   1   4   38.40   14.70
   7   1   4   41.40    9.80
   7   1   4    3.60   26.00
   7  -1  -4   23.40   13.90
   8   1  -4   10.80   13.80
   8   1  -4   18.50   12.90
   8   1  -4   -3.20    7.40
   8  -1   4    1.60   11.80
   8  -1   4   16.60   12.30
   8  -1   4   12.40   13.10
   8  -1  -4    9.60   13.10
   8  -1  -4    5.30   10.90
   8   1   4   22.50   12.70
   8   1   4   17.30   11.00
   8   1   4   33.30    9.50
   8   1   4    9.00   14.70
   9   1  -4   39.10   16.30
   9  -1   4   30.70   13.30
   9  -1   4   24.70   15.50
   9   1  -4   32.00   13.00
   9  -1  -4   13.20   14.80
   9   1   4   30.10   10.90
   9   1   4   44.30   10.30
   9   1   4   14.10   14.60
   9  -1  -4   17.80   13.70
  10   1  -4    7.70   10.00
  10  -1   4    0.60    6.90
  10  -1   4    5.70    8.90
  10   1  -4    0.80    7.60
  10   1   4    8.20    7.40
  10  -1  -4   13.30    8.10
  10  -1  -4   -3.40    9.60
   0  -2  -4  596.64   91.39
   0   2   4  530.15   90.19
   0   2  -4  695.43   96.59
   0   2  -4  655.03   91.09
   0  -2  -4  634.24   90.49
   0   2  -4  593.44   90.09
   1   2  -4  407.46   57.19
  -1  -2  -4  364.76   62.79
   1   2  -4  343.07   57.29
  -1  -2  -4  390.36   58.59
  -1   2   4  450.55   57.89
   1  -2  -4  364.56   58.69
  -1   2  -4  421.56   58.69
  -1   2  -4  354.16   58.59
   2   2  -4   81.59   18.60
   2  -2   4  144.29   78.49
  -2   2   4   96.19   15.10
  -2  -2  -4   73.69   71.39
   2   2  -4   75.09   12.80
  -2   2  -4  118.59   32.60
   2  -2  -4  218.68  130.39
   2  -2  -4   62.89   15.20
   2  -2  -4   70.89   29.20
  -2  -2   4   85.39   18.70
  -2   2  -4   95.49   21.10
   3  -2   4 1000.60  206.58
  -3  -2  -4 1013.50  220.28
  -3   2   4  739.93  123.69
   3   2  -4  899.31  121.99
  -3  -2   4  711.53  125.09
   3  -2  -4 1212.28  244.18
   3  -2  -4  944.31  127.19
   4  -2   4  529.95  207.48
  -4  -2  -4 1283.67  339.37
  -4   2   4  777.12  126.79
   4  -2  -4  652.73  340.67
  -4   2  -4  989.40  162.28
  -4   2  -4  897.51  125.49
  -5   2   4   47.40   19.10
  -5   2   4   51.49   22.60
  -5  -2  -4   12.70   12.80
   5  -2   4   30.30   19.30
  -5  -2  -4  196.08  109.39
   5  -2   4  185.08  307.37
   5  -2  -4   61.39  446.06
  -5   2  -4   35.20   99.59
  -5  -2   4   38.70   27.90
  -5   2  -4   34.60   14.70
   6  -2   4   90.19   22.10
   6  -2   4  115.19   21.80
   6   2  -4   82.29   18.00
   6   2  -4   77.49   18.60
   6   2   4  108.29   21.30
   6   2   4   85.29   17.80
   6   2   4  146.59   28.10
   6  -2  -4   95.99   24.00
   6  -2  -4   88.79   22.90
   7   2  -4   12.20   11.50
   7  -2   4   19.40   23.10
   7  -2   4   11.50   14.20
   7  -2   4    1.50   12.60
   7   2  -4   12.30    7.10
   7   2  -4   12.00   14.00
   7  -2  -4   13.90   11.50
   7   2   4   -3.50   17.00
   7  -2  -4   13.00   16.00
   7   2   4   18.90    7.90
   7   2   4   12.70   10.50
   8  -2   4    4.70   12.30
   8   2  -4    7.60    7.10
   8   2  -4   42.50   14.10
   8   2  -4   11.60   11.20
   8  -2   4   18.60   12.70
   8   2   4   30.20    8.70
   8  -2  -4   15.20   11.80
   8  -2  -4   17.20   16.60
   8  -2  -4   52.69   17.80
   8   2   4   28.70   10.70
   8   2   4   12.00   14.80
   9  -2   4   17.80   16.40
   9   2  -4   54.69   14.30
   9  -2   4   43.90   16.20
   9   2  -4   32.20   17.10
   9   2  -4   51.49    9.60
   9  -2  -4   28.80   15.50
   9   2   4    9.90   10.90
   9  -2  -4   20.90   21.50
   9   2   4   40.60    9.70
  10  -2   4   20.10    8.50
  10   2  -4   32.50    9.30
  10  -2   4   17.10    7.80
  10   2   4    3.70   10.20
  10   2   4   56.19   14.10
  10  -2  -4   18.20    8.90
  10  -2  -4   11.80    7.90
   0  -3  -4  495.15   65.89
   0   3   4  388.56   65.59
  -1  -3  -4  914.61  124.19
   1   3  -4  742.53  122.99
  -1   3   4  746.93  123.29
   1  -3   4  948.51  123.09
   1   3  -4  806.12  122.89
  -1   3  -4  802.82  133.89
   1  -3  -4  960.40  123.89
  -1   3  -4  882.31  123.89
   1  -3  -4  771.12  124.39
   2   3  -4  390.06   62.09
  -2  -3  -4  465.65   65.49
  -2   3   4  392.66   63.29
   2  -3   4  494.05   62.99
  -2   3  -4  462.15   77.89
   2  -3  -4  322.07   89.19
  -2   3  -4  398.16   65.59
  -3   3   4  199.38   29.10
  -3  -3  -4  170.08   31.60
   3  -3   4  274.37  170.68
   3  -3   4  150.88   25.60
  -3  -3  -4  514.75  217.08
   3  -3  -4  147.69   27.80
  -3   3  -4  197.48   61.09
   3  -3  -4  412.36  236.88
  -3   3  -4  210.28   41.70
  -3  -3   4  155.38   35.50
   4  -3   4 1253.97  311.07
  -4   3   4  916.61  153.08
  -4   3  -4 1101.39  151.78
   4  -3  -4 1592.54  451.45
   5  -3   4  510.65   72.89
   5   3  -4  451.75   66.99
   5  -3   4  461.75   69.69
   5  -3   4  139.79  415.46
   5   3   4  439.06   67.09
   5  -3  -4  441.26   70.49
   5  -3  -4  465.15   72.29
   5   3   4  431.36   67.89
   6   3  -4   61.29   17.20
   6  -3   4   35.40   18.50
   6   3  -4   20.50   11.50
   6  -3   4   32.70   14.80
   6   3  -4   29.50    8.90
   6   3  -4   13.00   16.00
   6  -3  -4   25.70   13.70
   6   3   4   45.40   22.50
   6   3   4   51.79   21.20
   6   3   4   21.80    8.70
   6  -3  -4   31.80   18.60
   6   3   4   49.20   11.50
   7   3  -4   21.20    7.70
   7   3  -4    7.50   11.40
   7   3  -4   24.20   13.40
   7  -3   4   18.70   15.90
   7  -3   4   25.60   13.20
   7   3  -4    7.40   16.20
   7  -3  -4   22.00   12.00
   7   3   4   12.00    6.70
   7  -3  -4   27.20   18.50
   7   3   4   17.60   10.10
   7   3   4   13.80   17.10
   7  -3  -4    1.30   16.60
   8  -3   4    9.90   13.50
   8   3  -4   17.30   12.20
   8  -3   4   27.70   11.80
   8   3  -4   25.10   11.90
   8   3  -4   19.30    7.30
   8   3   4    9.70   15.90
   8   3   4   16.30    7.30
   8  -3  -4   34.20   15.20
   8  -3  -4   32.30   12.50
   8  -3  -4   16.90   15.50
   8   3   4   26.70    9.60
   9  -3   4    7.40    8.80
   9   3  -4   25.40    9.90
   9   3  -4   24.30   10.70
   9   3  -4   23.20    5.90
   9  -3   4   20.50    9.50
   9   3   4    2.80    9.80
   9   3   4   10.90    6.80
   9  -3  -4   28.60   11.30
   9   3   4   24.70    5.80
   9  -3  -4    4.90   10.10
   9  -3  -4    2.20   11.50
  10  -3   4    8.70    7.10
  10   3  -4   14.70    6.60
  10  -3   4   10.90    7.60
  10  -3  -4    2.50    6.80
  10  -3  -4    6.00    8.50
  10   3   4   12.30    7.40
   0  -4   4  826.22  125.69
   0  -4  -4  871.71  126.39
   0   4  -4  877.81  125.89
   1   4  -4  531.35   78.29
  -1  -4  -4  428.46   81.49
   1  -4   4  508.35   78.59
  -1  -4  -4  608.14   80.29
   1   4   4  492.05   77.79
  -1   4  -4  574.24   79.99
  -1  -4   4  618.44   79.59
   1  -4  -4  499.45   81.39
   2   4  -4  532.05   78.09
  -2  -4  -4  625.44   81.89
   2  -4   4  536.95   79.09
   2  -4  -4  435.56   81.29
  -2   4  -4  502.55   81.29
   2  -4  -4  936.81  275.27
  -2  -4   4  705.63  124.89
   3  -4   4 -144.29  278.07
  -3   4   4   20.40   13.90
  -3   4   4    7.30   15.10
  -3   4   4    5.30   11.30
   3  -4   4    7.60    8.10
   3  -4  -4 -268.47  334.77
  -3   4  -4   21.50   58.39
   3  -4  -4   27.40   12.00
  -3   4  -4   -9.20   20.50
  -3  -4   4   19.20   25.50
  -3   4  -4    8.90    9.90
   4   4  -4   47.30   11.40
  -4   4   4   59.79   21.90
   4  -4   4 -194.48  358.86
   4   4  -4   92.19   19.70
  -4   4   4   75.19   27.70
   4  -4  -4   34.50   19.30
   4   4   4   84.49   17.20
  -4  -4   4   11.70   35.30
  -4   4  -4   40.50   20.40
  -4   4  -4   38.30   75.69
   4  -4  -4   83.79   16.50
   4  -4  -4  335.97  528.25
   4   4   4   69.69   12.90
   5   4  -4   -1.20    5.40
   5   4  -4  -18.10   12.10
  -5   4   4  -78.89   53.79
   5  -4   4   24.90   16.40
   5  -4   4   14.80   16.10
   5   4  -4    0.50   10.40
   5   4   4    4.40    8.80
   5  -4  -4   11.10   17.60
   5   4   4  -12.20   17.10
   5   4   4   -1.60   12.50
   5   4   4    0.60    6.20
   5   4   4   16.30   26.40
   5  -4  -4    1.50   16.30
   6  -4   4   95.89   24.00
   6   4  -4   84.99   17.90
  -6   4   4   25.50   54.49
   6   4  -4   59.79   21.90
   6   4  -4   90.39   16.40
   6   4   4   50.29   24.00
   6   4   4   52.59   15.80
   6   4   4   29.70   18.10
   7   4  -4   98.59   22.10
   7   4  -4  118.29   24.80
   7  -4   4  102.79   24.60
   7  -4   4  104.89   24.60
   7   4  -4  106.89   27.20
  -7   4   4   86.69   48.30
   7   4  -4  123.19   19.70
   7   4   4  124.69   21.10
   7  -4  -4  176.68   30.60
   7   4   4  118.69   19.20
   7  -4  -4   86.09   23.10
   8   4  -4  107.69   17.90
   8   4  -4  145.09   25.40
  -8   4   4  116.49   53.59
   8  -4   4   71.89   19.30
   8   4  -4   83.29   22.20
   8   4   4   95.39   17.70
   8   4   4  115.69   18.50
   8  -4  -4   87.59   22.00
   8  -4  -4  161.08   27.00
   8   4   4   56.69   22.80
   9   4  -4   57.59   13.00
   9   4  -4   48.90   10.30
   9  -4   4   27.80   11.70
   9  -4  -4   40.10   12.10
   9   4   4   40.50    9.50
   9   4   4   62.19    9.90
  10   4  -4   13.80    4.90
  10   4  -4    5.70    7.70
  10  -4   4   -5.20    5.90
  10  -4  -4    5.00   10.20
  10   4   4   -4.50    6.50
  10  -4  -4   10.40    7.90
  10   4   4   -7.70    4.70
   0   5  -4  480.05   64.79
   0  -5   4  381.26   64.99
  -1  -5  -4  101.09   25.60
   1  -5   4   70.09   15.20
   1   5  -4   81.39   14.10
  -1   5   4   62.79   15.00
   1  -5  -4  270.17  330.77
  -1   5  -4   77.29   16.70
   1  -5  -4   90.09   22.50
  -1  -5   4   77.59   18.50
  -1   5  -4   33.90   45.50
  -2   5   4  106.59   28.40
   2   5  -4  174.48   24.50
   2  -5   4  134.39   27.30
   2  -5  -4  180.38   35.00
  -2   5  -4  219.08   33.40
  -2   5  -4  156.38   77.89
   2  -5  -4  683.13  415.36
  -2  -5   4  155.38   34.30
   3   5  -4  277.47   39.30
   3   5  -4  260.77   36.90
   3  -5   4  808.42  562.04
  -3   5   4  237.78   47.10
  -3   5   4  177.08   42.70
   3   5   4  216.38   37.70
   3  -5  -4  263.17  518.95
   4   5  -4  164.18   29.20
  -4   5   4  293.87   51.09
   4  -5   4  228.78   39.00
  -4   5   4  277.87   62.79
   4   5  -4  183.18   29.40
   4   5  -4  206.88   34.80
   4   5  -4  176.78   32.80
   4   5   4  178.08   28.90
   4   5   4  183.98   30.70
   4   5   4  177.78   31.60
   4   5   4  158.28   47.50
   4   5   4  197.38   31.00
   5   5  -4   56.59   12.30
   5  -5   4   70.29   19.50
   5   5  -4   60.89   11.30
   5   5  -4   83.19   16.60
   5  -5   4   44.90   17.90
  -5   5   4  132.39   47.20
   5   5  -4   52.49   14.60
   5   5   4   49.70   10.90
   5   5   4   58.49   14.60
   5  -5  -4   60.09   24.70
   5   5   4   38.60   28.70
   5   5   4   58.19   12.80
   6  -5   4  150.08   34.00
   6   5  -4  198.18   31.20
  -6   5   4  116.69   27.70
   6  -5   4  176.38   31.50
   6   5  -4  173.58   29.10
  -6   5   4  314.97   68.99
   6   5  -4  179.88   26.00
   6  -5  -4  157.68   39.30
   6   5   4  156.18   30.10
   6   5   4  170.78   25.70
   6   5   4  123.79   34.10
   6   5   4  169.38   27.40
   6  -5  -4  131.29   31.70
   7   5  -4  396.86   69.79
   7  -5   4  479.25   70.79
   7   5  -4  474.75   68.39
   7   5  -4  551.84   71.39
   7  -5  -4  408.36   73.79
   7   5   4  437.36   72.19
   7   5   4  466.25   68.89
   7   5   4  478.55   68.29
   8  -5   4   47.90   20.30
   8   5  -4  124.99   30.60
   8  -5   4   69.09   23.00
   8   5  -4   88.09   17.70
   8  -5  -4   62.39   26.90
   8   5   4   89.99   18.40
   8  -5  -4   85.69   25.90
   8  -5  -4   32.00   25.40
   9   5  -4   11.50    8.50
   9  -5   4   -1.50    8.60
   9   5   4    5.60    3.20
   9  -5  -4    5.00    9.90
   9  -5  -4   -3.70    9.10
   9  -5  -4   10.10   11.40
   9   5   4    3.80    4.80
   0   6   4   73.99   16.20
   0   6   4   86.99   15.60
   0  -6   4   84.19   27.50
   0  -6  -4  101.79   27.50
  -1  -6  -4    4.30   27.80
   1   6  -4    9.10   11.80
  -1   6   4    3.10    7.20
   1  -6   4    4.70   10.90
  -1   6   4    3.50   14.30
   1   6  -4    7.00    6.80
  -1   6   4   22.10    9.60
  -1  -6   4   20.10   29.70
   1  -6  -4    7.10   19.70
  -1   6  -4   -6.00   12.10
  -1   6  -4   12.60   16.60
   1  -6  -4 -315.87  524.75
   1  -6  -4   29.20   25.50
  -1  -6   4   -1.40   15.50
   1   6   4   62.09   60.09
   1   6   4   16.00   10.50
   1   6   4    4.90    7.10
   2   6  -4   22.90    8.60
  -2   6   4   45.00   10.30
  -2  -6  -4  109.29   36.40
  -2   6   4   56.19   15.50
  -2  -6  -4   82.29   38.10
   2   6  -4   42.00   12.50
   2  -6  -4   18.00   30.20
   2   6   4   69.69   22.50
   2  -6  -4   45.80   50.69
   2   6   4   91.29   39.20
  -2  -6   4  117.39   40.90
  -2  -6   4   36.20   23.60
  -2   6  -4   37.30   19.90
  -2   6  -4   12.40   20.70
   2   6   4   29.30   10.60
   3   6  -4   33.00   11.90
   3  -6   4   -6.60   16.30
   3   6  -4   19.60    8.90
   3  -6   4   55.29   28.60
   3   6  -4   30.40    8.80
   3  -6   4    8.70   19.60
  -3   6   4    9.20    8.60
   3  -6  -4   -1.00   14.20
   3   6   4   25.10    7.90
  -3  -6   4   25.30   41.00
  -3   6  -4    4.10   26.40
   3  -6  -4   14.60   22.40
   3   6   4   32.30    8.60
   3   6   4   16.60   11.90
   3   6   4   13.80    9.10
   3   6   4   14.70   40.30
   4   6  -4   57.39   14.10
   4  -6   4  123.89   26.90
   4  -6   4   41.70   20.50
   4   6  -4   79.69   17.40
   4   6  -4   50.49   10.50
  -4   6   4   62.69   39.50
  -4   6   4   34.80   12.70
  -4   6   4  136.99   40.20
   4   6   4   52.69   10.50
   4   6   4   41.50   10.50
   4   6   4   53.89   33.40
   4   6   4   66.89   13.50
  -4  -6   4   38.30   44.60
   4  -6  -4   13.90   27.80
   4   6   4   68.69   13.40
  -4   6  -4   13.20   49.00
   4  -6  -4   20.40   16.20
   5  -6   4   58.99   19.70
   5   6  -4   64.69   10.60
   5   6  -4   55.59   15.60
   5   6  -4   61.29   13.50
   5   6  -4   41.60   10.00
  -5   6   4   27.60   12.80
   5  -6   4   30.00   18.60
   5   6   4   68.49   17.50
   5   6   4   50.09    9.80
   5   6   4   32.00   27.50
  -5  -6   4   44.90   49.20
   5  -6  -4   24.40   16.00
   5   6   4   61.19   13.40
   5   6   4   52.19   11.70
   5   6   4   43.50   10.60
   6   6  -4  286.27   45.40
   6  -6   4  334.47   48.60
  -6   6   4  228.18   49.10
   6   6  -4  289.97   43.60
   6   6   4  339.67   49.60
   6   6   4  293.37   43.60
   6   6   4  290.17   46.00
   6   6   4  291.97   44.60
   6   6   4  263.37   44.70
   7   6  -4    6.40    4.70
   7  -6   4   -4.60   14.10
   7   6  -4    7.20   12.40
   7  -6   4    6.90   14.00
   7   6  -4    3.00    9.00
   7  -6  -4   33.10   38.00
   7   6   4    2.40    4.90
   7   6   4    2.50   20.60
   7  -6  -4   29.90   19.90
   7   6   4   11.50    7.50
   7  -6  -4   -5.70   13.90
   8   6  -4   15.70    7.10
   8   6  -4   22.50   10.10
   8  -6   4    6.90   10.80
   8  -6   4    1.90    8.20
   8  -6  -4    9.20   20.90
   8   6   4    6.10    3.40
   8   6   4   13.10    5.90
   8  -6  -4   -4.60   10.20
   8  -6  -4    1.80   10.80
   9   6  -4    8.80    3.60
   9   6  -4    8.90    6.50
   9  -6   4   -8.20    7.20
   9  -6   4   -7.20    6.10
   9  -6  -4    2.40   10.10
   9  -6  -4   -4.00   14.20
   9   6   4    9.20    4.10
   9   6   4    6.90    2.60
   0   7   4  388.06   59.79
   0   7   4  374.96   59.29
   0   7  -4  452.75   59.49
   0   7   4  412.26   58.69
   0  -7   4  416.76   69.89
   0   7  -4  323.97   61.39
   1   7  -4  174.38   33.30
  -1   7   4  197.68   35.00
  -1   7   4  164.78   30.50
   1   7  -4  211.98   31.70
  -1   7   4  180.38   32.90
   1  -7   4  223.58   42.90
   1   7   4  227.78   32.20
   1  -7  -4  176.18   42.30
  -1  -7   4  263.47   50.29
   1   7   4  227.18   30.60
   1  -7  -4  106.19   44.40
   1   7   4  202.68   32.60
   2   7  -4   72.99   16.80
  -2   7   4   57.29   13.60
   2   7  -4   87.19   15.80
  -2   7   4   96.79   22.40
   2   7  -4   66.89   16.70
   2  -7  -4   71.49   37.60
  -2  -7   4  123.59   38.50
   2  -7  -4   46.50   27.30
   2   7   4   90.09   17.10
  -2  -7   4   19.30   34.40
   2   7   4   80.49   14.70
   2   7   4  110.19   21.70
   2   7   4   78.49   17.00
  -3  -7  -4  155.58   37.80
  -3   7   4   33.60   28.50
  -3  -7   4  133.59   52.89
   3   7   4   19.90   34.50
   3   7   4   95.69   16.30
   3   7   4  101.39   20.80
   4   7  -4   99.29   17.60
  -4  -7  -4  104.29   35.90
  -4   7   4   99.89   17.50
   4   7  -4  104.29   19.30
   4   7  -4  111.09   17.60
  -4   7   4  158.48   42.60
   4   7   4   71.99   16.70
   4   7   4   89.89   16.80
  -4   7  -4   21.80   36.80
   4   7   4   94.59   19.00
   4  -7  -4   16.40   48.80
   4   7   4   24.80   32.00
  -4  -7   4  116.09   36.10
   4   7   4  112.29   19.60
  -5  -7  -4  323.57   59.89
   5   7  -4  205.88   35.60
  -5   7   4  184.08   61.49
   5  -7   4  253.97   42.60
   5   7  -4  214.18   33.50
   5   7  -4  228.38   33.30
  -5   7   4  225.28   35.70
   5   7   4  171.78   33.30
   5   7   4  185.38   34.90
   5   7   4  259.87   38.00
  -5  -7   4  221.38   46.40
   5   7   4  227.38   34.60
   5   7   4  213.68   32.90
   6  -7   4   16.80   17.50
   6   7  -4   31.70    9.90
   6  -7   4   -5.00   16.00
  -6   7   4   16.30   12.40
   6   7  -4   21.30    6.40
   6   7  -4   30.40   12.90
  -6  -7   4   32.60   25.00
   6   7   4   31.10   13.20
   6   7   4   25.90    6.80
   6   7   4   32.20    8.70
   6   7   4   13.90    7.40
   7   7  -4   10.00    4.20
   7  -7   4   10.10   13.20
   7  -7   4  -12.70   13.80
   7   7  -4    7.10    7.20
   7   7  -4   19.90   11.00
   7   7   4   14.40    5.90
   7   7   4   14.10    4.30
   7   7   4    0.60    7.60
   7  -7  -4  -13.20   13.40
  -7  -7   4  -13.60   16.50
   8  -7   4    5.20    9.90
   8   7  -4   20.10    7.10
   8   7  -4   18.20    4.50
   8   7  -4   16.80    8.20
   8  -7  -4    7.90    8.50
   8   7   4   15.30    5.10
  -8  -7   4   35.90   23.80
   0  -8  -4    9.10   19.20
   0   8  -4    6.00   11.90
   0  -8   4    7.00   24.90
   0  -8  -4    3.50   40.70
   0   8   4    3.50   16.30
   0   8   4   10.00    6.00
   0   8   4   38.30   11.00
   0  -8   4  -32.80   20.10
  -1   8   4    1.90   11.50
   1   8  -4    0.40    7.60
  -1  -8  -4   -7.20   21.40
   1  -8   4   11.90   24.40
  -1   8   4   -1.50    6.00
   1   8  -4   -0.80    9.90
   1  -8   4   -5.00   19.80
   1   8  -4   12.30   12.10
   1   8   4    1.90    5.60
   1  -8  -4   13.30   25.10
   1   8   4    2.70    8.80
  -1  -8   4   -5.60   21.80
  -1  -8   4  -10.50   28.10
  -1   8  -4  -18.90   15.70
   1  -8  -4   20.30   31.30
  -2   8   4   56.19   21.20
   2   8  -4   91.69   15.70
   2  -8   4   34.70   23.50
  -2   8   4   71.59   13.60
  -2  -8  -4  106.49   27.30
  -2   8  -4   47.10   23.80
  -2  -8   4   93.59   29.40
   2  -8  -4   26.20   28.70
   2   8   4   93.09   13.80
   2   8   4   80.89   16.40
   2   8   4   88.99   22.10
  -2  -8   4   73.49   43.00
  -3   8   4   14.20    7.80
  -3  -8  -4   35.40   24.40
  -3   8   4   37.70   27.90
   3   8  -4   23.30    8.10
   3   8  -4   20.60    7.10
   3   8  -4   14.00    9.70
   3   8   4   16.20    6.50
  -3   8  -4   21.20   22.80
  -3  -8   4   22.60   26.40
   3   8   4   31.70   14.60
   3   8   4   15.40    8.20
   3  -8  -4    5.90   26.80
   3   8   4   15.20    7.80
   4   8  -4   20.60    7.60
   4  -8   4   38.10   23.50
  -4   8   4    9.80   37.40
   4   8  -4   35.90   14.70
  -4   8   4   16.80    8.80
   4   8  -4   22.50    9.90
   4   8  -4   25.60    7.20
   4  -8   4   28.40   23.30
  -4  -8  -4   27.60   26.80
   4   8   4   16.10   10.60
   4   8   4   21.10    8.60
   4   8   4   11.30    5.70
  -4   8  -4   35.80   28.20
  -4  -8   4    2.80   23.30
   4   8   4   12.30    6.60
   5   8  -4   85.19   16.30
  -5   8   4   95.49   16.20
   5   8  -4   98.99   15.30
  -5   8   4   59.19   44.70
  -5  -8  -4   84.39   28.80
   5   8  -4   73.39   14.80
   5  -8   4   44.20   21.90
   5   8   4   81.89   16.60
   5   8   4   61.59   14.10
   5   8   4   88.69   17.30
  -5  -8   4   56.39   24.30
   5   8   4   71.89   14.50
   5   8   4  110.39   19.30
   6   8  -4   26.10    8.40
   6  -8   4   16.80   14.10
   6   8  -4   39.10   11.70
  -6  -8  -4   38.90   20.30
   6  -8   4   19.70   17.40
   6   8   4   18.70    7.20
   6   8   4   26.20    5.90
   6   8   4   17.20    5.00
  -6  -8   4   16.80   17.00
   7   8  -4   16.80    6.20
   7  -8   4   12.60    9.90
   7   8  -4   16.90    4.60
   7  -8   4  -10.30   15.60
   7   8  -4   28.70    8.90
  -7  -8  -4   18.80   18.50
   7   8   4   13.70    5.20
  -7  -8   4   25.90   12.80
   7   8   4   19.20    6.90
   7   8   4   15.10    4.40
   8  -8   4   17.30    7.10
   8  -8   4   19.80   17.50
   8   8   4   18.90    5.00
   8  -8  -4    9.80    8.00
  -8  -8   4    0.00   12.30
   0  -9  -4   -2.10   23.50
   0  -9   4    9.30   20.70
   0   9   4   16.60   16.40
   0  -9  -4   -4.80   31.00
   0  -9   4   -0.30   30.20
   0   9  -4   40.30   10.20
   0   9   4   20.00   10.60
   0   9  -4   36.30   18.90
   0   9   4   15.00    6.20
  -1   9   4  171.98   33.80
   1   9  -4  141.29   30.90
  -1   9   4  148.89   22.90
   1  -9   4  111.39   46.10
  -1  -9  -4  161.18   39.70
   1   9  -4  152.88   24.40
  -1  -9   4  105.89   31.30
   1  -9  -4  240.68   50.59
   1   9   4  154.38   26.10
  -1   9  -4   98.49   29.50
  -1  -9   4   58.49   44.70
   1   9   4  157.08   22.90
  -2  -9  -4   -7.80   77.49
   2   9  -4  168.98   25.00
  -2  -9  -4  186.88   39.60
  -2   9   4   87.49   37.80
  -2   9   4  159.78   24.70
  -2  -9   4   73.39   55.09
  -2  -9   4  166.08   35.80
   2   9   4  160.48   26.60
   2   9   4  151.18   24.20
   3   9  -4   10.70   12.60
   3  -9   4 -211.78  103.19
   3   9  -4   -2.30    8.40
  -3  -9  -4   31.70   23.20
  -3   9   4   -3.40   27.50
  -3   9   4    1.50    5.90
   3   9  -4    3.50    6.20
  -3   9  -4   11.10   22.10
   3   9   4    0.20    7.50
  -3  -9   4   14.60   19.30
   3   9   4    4.20   13.60
   3  -9  -4   21.90   38.10
   3   9   4    2.40    4.20
  -4   9   4   68.99   14.00
   4   9  -4   64.09   10.50
   4   9  -4   57.39   12.50
   4  -9   4   51.69   26.00
  -4   9   4   23.00   27.10
   4   9  -4   44.70   11.80
  -4  -9  -4   32.40   24.00
   4   9   4   51.79   12.50
   4   9   4   56.19    9.70
  -4  -9   4   42.80   24.90
  -4   9  -4    3.00   25.60
   4   9   4   38.90   13.90
   5   9  -4    4.40    6.20
   5  -9   4    8.00   14.50
  -5  -9  -4    7.70   17.00
   5   9  -4    9.60    8.80
   5   9  -4   13.30    5.20
  -5   9   4   14.00    8.10
   5   9   4   13.10    5.60
   5   9   4    7.20    4.80
   5   9   4    2.40    3.50
   5   9   4    5.60    6.80
  -5  -9   4   -0.10   15.60
   6   9  -4   -1.00    4.50
   6   9  -4   -0.20    3.90
   6  -9   4   12.30   10.60
  -6  -9  -4   -6.20   13.80
   6   9  -4   14.50    8.00
  -6  -9   4   -4.50   10.70
   6   9   4    3.00    3.20
   6   9   4    0.80    4.60
   6  -9  -4  -17.60    9.20
   6   9   4    7.50    3.20
   7  -9   4   -5.00    8.60
   7   9  -4    1.90    3.10
   7   9  -4    2.00    6.60
  -7  -9  -4   24.10   11.80
   7   9   4    8.20    2.90
  -7  -9   4   -4.30    9.00
   7   9   4    3.40    5.10
   7  -9  -4   11.20    6.90
   0 -10  -4  -27.10   42.40
   0  10  -4  -20.00   27.90
   0 -10   4  -11.30   40.90
   0  10   4   13.10    5.30
   0 -10   4   13.50   21.20
   0  10  -4   -5.50   13.10
   0 -10  -4   22.10   30.10
   1  10  -4   63.29   16.60
  -1  10   4  126.39   29.80
  -1 -10  -4  -68.49   60.19
  -1 -10  -4   61.29   28.10
  -1  10   4   62.49   12.80
  -1  10  -4   81.39   33.20
  -1 -10   4   65.89   44.30
   1  10   4   65.79   12.00
  -1 -10   4   25.60   21.40
   1 -10  -4    5.00   27.30
   1  10   4   96.89   16.60
   2 -10   4  -43.20   62.29
  -2 -10  -4   32.50   32.50
  -2  10   4   24.80   10.20
  -2 -10  -4  -10.70   90.99
   2  10  -4   14.80    9.20
  -2  10   4   -1.40   32.50
  -2 -10   4   32.30   55.49
   2 -10  -4    1.10   29.40
  -2 -10   4    2.80   23.60
   2  10   4   35.50    9.70
  -3  10   4   16.70    6.30
  -3  10   4    4.60   29.70
   3  10  -4   28.70   10.70
  -3 -10  -4   15.10   20.10
   3  10  -4   14.00    5.10
   3  10   4   11.90    4.10
  -3 -10   4    1.40   12.80
   3  10   4   26.50   18.20
  -3  10  -4   -8.00   23.30
   4  10  -4   -0.70    3.70
  -4  10   4    7.90    6.80
   4  10  -4   23.80    9.00
  -4 -10  -4    3.90   14.90
   4  10   4   -6.20    7.60
  -4 -10   4   -4.70   12.20
   4  10   4    9.00    4.90
   4  10   4    3.20    2.90
   5  10  -4   18.80    7.50
  -5 -10  -4    0.30   12.60
   5  10   4    2.40    2.70
   5  10   4    6.00    4.90
  -5 -10   4   -2.00    9.50
   5  10   4    5.80    5.80
  -6 -10  -4   20.20   12.00
  -6 -10   4    6.90    9.30
   6 -10  -4   19.50    8.10
   6  10   4   16.40    5.00
   0  11   4    5.90    3.10
  -1 -11  -4   47.20   22.50
  -1  11   4   17.30    5.00
   1  11  -4   30.90   10.50
   2  11  -4   10.10    4.70
  -2  11   4    3.20    4.70
  -2 -11  -4  -10.20   16.50
   2  11  -4    6.70    8.20
  -2 -11   4   -7.00   13.90
   2  11   4    8.60    2.90
  -3 -11  -4   19.00   14.50
   3  11  -4   36.30    8.80
  -3  11   4   28.50    6.80
  -3 -11   4    0.40   11.30
   3  11   4   21.70    5.70
  -4 -11  -4   72.09   18.00
   4  11  -4   79.49   15.20
   4  11   4   74.99   13.00
   4  11   4   93.19   14.00
   4 -11  -4  103.29   19.90
   0  12   4    3.80    2.90
  -1  12   4    6.80    3.10
   1  12   4   -0.50    2.30
   0   0   5    5.50    5.60
   0   0  -5   -0.30    5.00
   0   0  -5   -2.20   14.40
   0   0   5    0.10    4.40
   0   0  -5   -0.80    5.00
   0   0  -5   -5.20    9.30
   0   0   5  -19.00   30.70
  -1   0   5 1733.43  323.87
   1   0   5 1913.91  297.17
   1   0  -5 2117.39  300.37
  -1   0   5 2263.27  297.47
   2   0  -5  162.18   24.20
   2   0  -5  127.59   22.90
  -2   0   5   52.39  122.79
  -2   0   5  104.19   21.20
   2   0   5  143.09   20.20
   3   0  -5  338.67   52.89
  -3   0   5  397.26   54.89
  -4   0   5   14.90   12.40
  -4   0   5   -6.90   10.20
  -4   0  -5   48.90   80.89
  -5   0   5   30.80   19.60
  -5   0  -5   98.99  133.79
  -5   0  -5   37.70   15.20
  -5   0   5   51.69   23.30
   6   0  -5  -12.40   14.30
   6   0  -5  -10.20    7.60
   6   0   5  -17.90   17.40
   6   0   5    5.20    9.60
   6   0   5   17.60   16.40
   6   0   5   -9.80   10.60
   6   0  -5   16.90   12.20
   7   0  -5   42.90   13.90
   7   0  -5   41.30   15.50
   7   0   5   31.10   16.60
   7   0   5   49.00   13.80
   7   0   5   14.40   20.30
   8   0   5    0.70   11.40
   8   0   5   -4.80   12.50
   8   0   5    6.10   10.20
   8   0  -5   11.80   14.70
   8   0  -5    3.60   10.30
   9   0   5   19.50    9.50
   9   0  -5   -3.20   24.30
   9   0   5    9.70   17.40
   9   0   5    6.70    8.40
   9   0  -5    7.80   14.90
  10   0   5   12.10   10.80
  10   0   5   -6.20    5.90
  10   0  -5    8.90    7.80
  10   0  -5   20.10    9.20
   0   1   5   43.20    8.60
   0   1  -5   27.40   10.00
   0   1  -5   75.59   19.50
   0  -1  -5   30.50    9.30
   0  -1  -5   46.90   14.20
   0   1  -5   43.50    9.40
   1   1  -5  568.34   82.59
   1   1  -5  543.15   82.99
  -1   1   5  500.05   82.69
  -1  -1  -5  518.55   85.29
   1  -1  -5  627.14   83.59
  -1   1  -5  579.14   83.09
   1  -1  -5  555.84   83.39
  -1   1  -5  584.34   83.99
  -1  -1   5  575.44   83.69
   2   1  -5 1029.30  141.49
  -2   1   5 1382.46  228.48
  -2  -1  -5  886.91  140.29
   2  -1   5 1033.90  140.29
   2  -1   5 1166.88  168.58
  -2  -1   5 1197.68  241.58
   2  -1  -5  789.82  141.39
   2  -1  -5  891.61  207.68
  -3  -1  -5  231.58   32.30
   3   1  -5  229.08   34.20
   3  -1   5  293.17  106.89
  -3   1  -5  157.68   37.60
   3  -1  -5  404.96  173.48
   4   1  -5  247.58   40.70
   4  -1   5  110.89  174.28
  -4   1   5  303.67   44.40
  -4  -1   5  238.48   45.10
  -5  -1  -5  133.19  130.29
   5   1  -5  192.88   42.80
   5  -1   5  302.47   45.60
   5  -1  -5  230.48   44.00
  -5   1  -5  193.18  147.49
   5   1   5  268.27   47.70
   5  -1  -5  294.47   49.90
   6   1  -5  120.89   24.30
   6  -1   5  196.68   36.00
   6   1  -5  176.78   35.10
   6   1  -5  124.19   27.40
   6  -1   5  193.48   30.60
   6  -1   5  115.19   28.50
   6  -1  -5  173.78   32.00
   6   1   5  128.29   25.50
   6  -1  -5  146.89   30.70
   6   1   5  160.08   36.90
   6   1   5  195.08   32.00
   6   1   5  127.19   26.00
   7  -1   5  316.27   44.90
   7   1  -5  233.88   43.30
   7  -1   5  284.07   46.80
   7  -1   5  276.07   44.80
   7   1   5  264.47   42.40
   7  -1  -5  269.47   45.60
   7  -1  -5  273.57   45.30
   7   1   5  261.37   47.30
   8   1  -5   -1.30    7.80
   8   1  -5   23.30   11.60
   8  -1   5   21.10   12.00
   8  -1   5   36.60   13.10
   8  -1   5    5.20   11.10
   8   1  -5   15.90   14.30
   8   1   5   20.20   14.40
   8   1   5   18.70   10.20
   8  -1  -5   21.30   12.90
   8   1   5   12.80   13.00
   8   1   5   13.30    9.10
   8  -1  -5   18.60   12.80
   9   1  -5   12.50   19.00
   9  -1   5   17.50   11.70
   9   1  -5   58.49   20.30
   9   1   5   41.60    9.20
   9  -1  -5   88.69   29.70
   9  -1  -5   31.30   16.20
   9   1   5   32.90   14.20
  10   1  -5   19.20   10.40
  10  -1   5   -1.50    9.00
  10  -1   5   21.40    7.00
  10   1   5   14.50    7.20
  10  -1  -5   16.70    7.30
  10  -1  -5   18.80   10.40
   0   2  -5  580.64   82.99
   0  -2  -5  628.44   84.19
   0  -2  -5  541.55   84.49
   0   2   5  501.45   83.09
  -1   2   5  286.97   45.40
  -1  -2  -5  278.37   47.00
  -1  -2  -5  312.77   50.99
   1   2  -5  301.47   44.80
   1   2  -5  249.68   52.19
   1   2  -5  312.77   45.50
  -1   2  -5  326.27   46.70
  -1   2  -5  334.77   46.80
   1  -2  -5  274.87   46.80
   2   2  -5 1220.28  180.38
   2  -2   5 1056.29  179.28
  -2  -2  -5 1488.65  199.48
   2   2   5 1279.37  179.78
   2  -2  -5 1408.66  278.87
  -2   2  -5 1265.17  192.78
  -2  -2   5 1203.08  284.57
  -3   2   5  135.99   22.00
   3  -2   5  121.99  110.39
  -3  -2  -5  -29.80  121.89
   3  -2  -5  428.96  246.68
   3  -2  -5   83.99   17.90
  -3  -2   5  111.59   22.20
  -4   2   5  318.47   48.50
  -4   2   5  238.18   49.20
  -4  -2  -5  334.37   87.29
   4  -2   5  284.37  194.48
  -4   2  -5  395.46  106.99
  -4   2  -5  269.97   45.40
   4  -2  -5  123.69  333.57
   5   2  -5  302.67   53.39
   5   2  -5  348.47   51.59
   5   2   5  371.16   51.89
   5  -2  -5  363.76   56.59
   5   2   5  309.07   52.59
   5  -2  -5  397.56   57.49
   5   2   5  351.36   59.69
   6   2  -5   -0.20    7.10
   6  -2   5    7.90   18.00
   6   2  -5  -11.10   17.70
   6  -2   5    6.60   13.10
   6   2  -5   -9.30    9.40
   6  -2   5    9.10   13.60
   6   2   5    5.80   10.00
   6  -2  -5    8.70   13.00
   6  -2  -5   10.00   14.90
   6   2   5   37.30   19.70
   7   2  -5  130.39   23.80
   7  -2   5  167.78   28.50
   7  -2   5  158.18   34.00
   7  -2   5  146.49   27.80
   7   2  -5  143.69   27.90
   7   2   5  134.49   23.70
   7   2   5  162.18   25.90
   7  -2  -5  148.79   32.30
   7   2   5  134.99   29.90
   7  -2  -5  126.59   28.50
   8  -2   5   42.00   16.20
   8   2  -5   42.20   10.40
   8  -2   5   40.70   13.90
   8  -2   5   39.10   18.40
   8   2  -5   58.79   16.70
   8   2  -5   32.60   13.30
   8   2   5   51.79   12.50
   8  -2  -5   41.30   14.40
   8   2   5   27.30   16.20
   8   2   5   67.49   11.30
   9  -2   5   -0.10    8.30
   9   2  -5    5.20    5.80
   9   2  -5   10.50   11.20
   9  -2   5    3.40   10.40
   9   2  -5   21.70   10.50
   9  -2  -5    5.80    9.80
   9   2   5    4.10    5.90
   9   2   5   22.10    8.90
   9   2   5   18.70    7.10
   9  -2  -5    7.80   11.60
  10  -2   5   -8.00    8.00
  10   2  -5    8.10    6.80
  10   2  -5    0.40   10.20
  10  -2   5    6.20    6.90
  10  -2  -5   -3.80    7.70
  10   2   5   -4.70   12.60
  10  -2  -5    4.10    7.30
  10   2   5   14.40    8.80
   0   3  -5   14.20   20.60
   0  -3   5    4.50   30.50
   0   3   5    7.10    5.00
   0  -3   5    9.00   10.10
   0   3   5   14.00    6.10
   0   3   5   10.10    6.50
   0  -3  -5  -42.70  110.39
   0   3  -5   -2.00    7.30
   0  -3  -5   -2.30    9.40
   0  -3   5   10.60    8.00
  -1   3   5  212.98   37.90
   1   3  -5  222.38   38.20
  -1  -3  -5  237.28   47.60
   1   3  -5  276.87   37.20
  -1  -3  -5  310.17   42.50
   1   3  -5  176.98   49.30
  -1   3  -5  283.97   51.99
   1  -3  -5  236.98   40.80
   1  -3  -5  182.08   61.09
   1  -3  -5  411.06  155.28
  -1   3  -5  274.27   40.50
   2   3  -5   17.90    6.00
  -2   3   5   36.20   11.30
  -2  -3  -5   16.80   17.10
  -2   3   5   63.29   13.00
   2  -3   5   31.10    8.10
   2  -3  -5    7.30   12.20
  -2  -3   5   32.00   39.60
   2  -3  -5  205.48  171.78
   2  -3  -5   12.10   55.69
  -2   3  -5    9.20   27.60
  -2   3  -5    7.20   15.30
  -2  -3   5   11.90   17.50
  -3   3   5   35.30   12.70
  -3   3   5   46.80   14.30
   3  -3   5   17.50    7.70
   3  -3   5  162.88  164.78
  -3   3  -5   38.30   55.79
  -3   3  -5   16.70   25.10
   3  -3  -5  148.59  268.87
  -3   3  -5   36.90   10.20
   3  -3  -5   25.20   10.40
  -3  -3   5    7.40   20.90
  -4   3   5    1.30   18.30
  -4   3   5   13.30   17.00
   4  -3   5  -86.19  245.28
  -4   3  -5   51.29   70.59
   4  -3  -5  344.07  455.75
  -4  -3   5    6.70   27.30
   5  -3   5   53.79   19.20
   5   3  -5   44.10   12.90
   5  -3   5   68.29   18.50
   5   3  -5   57.39   10.60
   5   3  -5   13.70   17.10
   5   3   5   47.00   10.30
   5   3   5   72.29   17.00
   5   3   5   49.40   12.60
   5  -3  -5   53.89   19.90
   5  -3  -5   41.10   19.10
   5   3   5   64.39   23.90
   6   3  -5   19.90   16.80
   6  -3   5   20.90   16.60
   6   3  -5   27.70    8.20
   6   3  -5   22.70   11.50
   6  -3   5   35.00   15.20
   6   3  -5  -20.00   17.50
   6  -3   5   14.20   13.10
   6  -3  -5   14.60   14.70
   6   3   5   22.70   19.90
   6   3   5   23.20    7.70
   6   3   5   38.50   10.40
   6  -3  -5    3.30   15.00
   7   3  -5   20.80   13.30
   7   3  -5   56.09   14.80
   7   3  -5   65.79   10.60
   7  -3   5   41.70   16.80
   7  -3   5   46.70   15.10
   7  -3  -5   50.59   17.60
   7  -3  -5   36.60   19.30
   7   3   5   41.40   10.00
   7   3   5   24.90   19.40
   7  -3  -5   32.90   15.10
   7   3   5   55.79   12.20
   8  -3   5   10.90   11.40
   8  -3   5    7.20   12.60
   8   3  -5    3.90   10.10
   8   3  -5   -4.10   11.80
   8   3  -5    6.30    7.10
   8   3   5    2.80    6.70
   8   3   5    8.10    7.60
   8  -3  -5  -10.70   13.50
   8   3   5   -2.80   13.20
   8  -3  -5   11.70   15.20
   8  -3  -5    8.00   12.80
   9  -3   5    5.10    8.50
   9   3  -5   18.40    8.90
   9   3  -5    4.50    9.10
   9  -3   5    1.70    9.70
   9   3  -5   15.20    5.40
   9   3   5    9.50    5.90
   9   3   5   28.50    8.70
   9   3   5    3.90    5.20
   9  -3  -5    0.50   10.00
   9  -3  -5    1.40    9.50
  10  -3   5   -2.20    7.50
  10  -3   5    9.70    7.10
  10   3  -5   -6.00    5.90
  10   3   5   -5.10    6.40
  10  -3  -5   -8.10    7.70
  10  -3  -5    2.10    7.10
   0   4  -5   27.50   33.00
   0   4   5   31.20    7.80
   0  -4   5   14.30   18.50
   0   4  -5   21.20    9.40
   0  -4  -5    8.60  200.88
   0  -4  -5   20.40   19.30
   0   4   5    7.80    9.10
   1   4  -5  174.68   28.70
   1   4  -5  154.88   25.90
   1  -4   5  184.68   27.30
   1   4  -5   96.89   41.10
   1  -4  -5  174.58   32.60
  -1   4  -5   95.59   50.79
  -1   4  -5  183.38   29.30
   1  -4  -5  566.94  235.58
   2  -4   5   63.79   14.30
   2  -4  -5   62.09   19.80
  -2   4  -5   66.99   19.20
  -2  -4   5   66.99   21.60
   2  -4  -5  480.75  273.17
  -2   4  -5   94.09   17.30
  -2  -4   5  128.99   82.39
  -2   4  -5   35.90   55.69
   3  -4   5   75.59   16.50
   3  -4   5   -5.40  321.17
  -3   4   5   54.59   18.60
   3  -4  -5  605.44  364.96
  -3   4  -5   77.99   27.40
  -3   4  -5  117.49   20.70
  -3   4  -5   42.90   73.79
  -3  -4   5   56.99   34.30
   3  -4  -5   49.30   17.10
   4   4  -5  462.75   66.19
   4  -4   5  171.88  442.96
   4   4  -5  442.26   65.49
  -4   4   5  478.15  107.99
   4   4  -5  423.76   63.19
  -4   4   5  503.65   72.39
   4   4  -5  359.36   63.29
   4   4   5  428.16   63.59
   4   4   5  465.95   64.49
   4  -4  -5  338.97   68.59
   4   4   5  469.75   64.69
   5   4  -5  168.48   24.80
   5   4  -5  140.29   25.20
   5  -4   5  157.88   28.80
   5   4  -5  127.79   20.70
   5  -4   5  103.09   25.40
  -5   4   5  204.98   59.89
   5  -4  -5   99.29   27.10
   5   4   5   95.79   30.10
   5   4   5  122.59   20.30
   5   4   5  106.39   22.20
   5   4   5  104.99   25.10
   6   4  -5  149.79   26.20
   6   4  -5  141.69   21.50
   6  -4   5  131.29   32.30
  -6   4   5  226.98   84.99
   6  -4   5  138.89   25.20
   6   4   5  117.69   21.00
   6  -4  -5  102.29   26.40
   6   4   5  116.39   22.60
   6  -4  -5  128.29   32.30
   7   4  -5    5.30   13.40
   7  -4   5   15.50   13.10
   7   4  -5   25.70   13.50
   7   4  -5   19.90    7.10
   7   4  -5   24.80   12.90
  -7   4   5    5.00   46.30
   7  -4   5   16.30   15.20
   7   4   5   27.50    8.80
   7  -4  -5   19.80   16.90
   7   4   5   15.40    6.50
   7  -4  -5   32.60   19.70
   7  -4  -5   26.50   16.60
   7   4   5    1.60   17.50
   8  -4   5   49.00   15.90
   8   4  -5  115.09   25.10
   8   4  -5   91.59   18.80
   8   4  -5   77.89   15.30
  -8   4   5  133.39   47.20
   8  -4  -5   44.40   19.20
   8   4   5   11.70   25.70
   8  -4  -5   52.49   20.50
   8   4   5   79.19   12.90
   8  -4  -5  110.59   30.20
   9  -4   5    7.30    7.70
   9   4  -5    6.80    4.70
   9   4  -5   16.50    8.20
   9  -4   5    1.10    7.30
   9   4   5    1.20    3.80
   9  -4  -5   -1.10    9.20
   9  -4  -5    2.40   12.60
   9  -4  -5   -4.00   11.10
   9   4   5    3.60   10.30
  10   4  -5    8.00    7.30
  10  -4   5   13.10   10.00
  10  -4   5   -9.30    8.60
  10   4  -5  -10.30   14.90
  10   4   5    9.40    5.00
  10  -4  -5   15.10    8.60
  10   4   5   -8.20    7.00
  10  -4  -5    3.70    9.00
   0   5  -5    7.00    7.60
   0  -5   5   16.20   11.80
   0  -5  -5   23.90   27.40
   0  -5  -5 -367.86  340.47
   0   5   5   -2.60    8.10
   0   5  -5   -1.50    9.10
   0   5  -5   -3.20   48.70
   0   5   5   10.40    6.60
   0   5   5    1.30   11.50
   1  -5   5   59.29   14.00
  -1   5   5   38.90   13.90
   1   5  -5   53.09   11.70
  -1  -5   5   53.89   16.60
   1  -5  -5   93.79   25.10
   1  -5  -5   81.29  376.46
  -1   5  -5   28.80   64.89
  -1   5  -5   56.99   14.80
   2   5  -5   92.99   14.50
  -2   5   5   53.09   17.80
   2  -5   5   89.29   17.50
  -2  -5   5   12.10   35.70
   2  -5  -5   81.59  473.05
  -2   5  -5  115.59   24.30
   2  -5  -5   62.39   22.10
  -2   5  -5   94.79   87.59
   3   5  -5   13.70   16.20
   3  -5   5 -139.29  617.24
  -3   5   5   19.70   18.50
  -3   5   5   -7.50   26.00
   3  -5   5   18.30   15.90
   3  -5   5    9.40   11.60
  -3   5   5   47.90   34.40
   3   5  -5   12.50    6.90
   3   5  -5   16.90    8.70
   3   5  -5    8.00   11.90
   3   5   5    9.80   36.90
   3   5   5   16.50    7.60
  -3   5  -5  -19.60   21.90
   3   5   5   18.20    9.60
   3  -5  -5   31.10   18.90
   3  -5  -5    2.50   15.70
   3   5   5   17.90   12.30
   4   5  -5  352.06   48.50
   4   5  -5  276.97   46.20
   4  -5   5  389.46   54.69
  -4   5   5  284.67   63.09
   4   5  -5  353.36   50.49
   4   5  -5  293.77   46.00
   4   5   5  324.47   47.20
   4   5   5  272.77   47.20
   4   5   5  303.87   47.10
  -4  -5   5  335.77   85.39
   4   5   5  245.98   56.59
   4   5   5  285.07   45.90
   5   5  -5   -1.10   11.20
  -5   5   5   38.40   44.90
   5  -5   5    7.90   17.00
   5  -5  -5   -7.00   23.10
   5   5   5  -20.40   16.40
   5   5   5    0.80   12.90
   5   5   5    6.10   22.60
   6   5  -5  282.67   46.90
   6   5  -5  295.47   44.30
   6  -5   5  321.07   48.80
   6   5   5  306.27   44.20
   6   5   5  294.57   45.30
   6   5   5  270.97   47.60
   6  -5  -5  305.07   56.09
   7   5  -5   13.60    5.70
   7  -5   5    0.70   12.60
  -7   5   5   10.10   12.70
   7  -5   5   15.20   13.80
   7   5  -5    5.30   10.90
   7   5  -5   24.20   12.80
  -7   5   5  -28.60   44.30
   7  -5  -5   32.90   17.70
   7   5   5    6.90    5.50
   7   5   5    4.30    6.70
   7  -5  -5    8.80   22.20
   7   5   5   11.60   16.90
   7  -5  -5  -10.90   14.50
   8  -5   5   19.90   13.10
   8   5  -5   25.30    9.40
   8   5  -5   25.40    7.10
   8   5  -5   32.20   13.40
   8   5   5   33.50   12.10
   8  -5  -5   37.60   12.60
   8   5   5   24.50    7.30
   8   5   5   16.60    5.60
   8  -5  -5    9.20   13.30
   9   5  -5   25.60    6.10
   9   5  -5   34.60    9.50
   9  -5  -5   36.30   15.20
   9   5   5   31.30    6.80
   9  -5  -5   11.80   11.20
   9   5   5   34.40    6.60
   0  -6   5  539.45   78.29
   0   6   5  482.55   70.69
   0   6   5  514.25   70.09
   0   6  -5  458.45   71.49
   0  -6  -5  134.49  643.54
   0  -6  -5  321.67   87.29
   0   6   5  429.56   69.19
  -1   6   5   79.69   18.30
   1  -6   5   46.10   26.00
   1   6  -5  115.59   19.20
  -1   6   5   48.20   15.10
   1   6  -5   45.50   17.30
   1  -6   5   80.99   28.20
   1   6  -5   74.99   16.00
   1  -6  -5   73.59   25.00
  -1  -6   5  113.79   32.80
  -1   6  -5   34.90   18.00
   1  -6  -5  -67.69  652.23
   1   6   5   83.69   14.60
  -1  -6   5   33.00   22.70
   1  -6  -5   49.00   34.80
   1   6   5   89.19   41.40
   1   6   5   77.39   12.90
   2   6  -5   48.90   10.50
   2  -6   5   17.60   20.20
   2  -6   5   17.30   17.50
  -2   6   5   20.50    9.20
   2   6  -5   46.70   13.60
   2   6  -5   55.49   11.60
  -2   6  -5   -5.10   22.70
   2  -6  -5   61.39   32.10
   2   6   5   30.80   16.80
   2   6   5   39.70    9.50
  -2  -6   5   44.20   37.60
   2   6   5   47.60   11.60
   2   6   5   90.09   43.40
   2  -6  -5   17.70   30.30
  -2  -6   5    4.60   25.70
   2   6   5   38.80   10.10
   3   6  -5  530.65   74.39
  -3   6   5  537.05   81.99
   3   6  -5  460.45   75.99
   3   6  -5  501.25   74.39
  -3  -6   5  614.94   94.69
   3   6   5  451.25   74.09
   3   6   5  476.75   74.79
   3   6   5  467.05   74.09
   3   6   5  598.24   76.29
  -4   6   5  176.28   39.30
  -4   6   5  296.37   63.19
   4   6   5  219.68   40.40
  -4  -6   5  320.47   68.59
   4   6   5  269.17   49.40
   4   6   5  242.88   37.00
   4   6   5  263.97   37.80
  -5   6   5   38.60   12.30
   5   6  -5   78.49   16.60
   5  -6   5   22.10   16.90
   5   6  -5   46.40   13.80
   5   6  -5   46.20    9.10
   5   6  -5   28.30    9.00
   5  -6   5   59.59   19.70
   5   6   5   29.10   24.10
   5  -6  -5   17.80   15.10
   5   6   5   41.10   11.50
  -5  -6   5   67.39   37.50
   5   6   5   50.49    9.30
   5   6   5   46.00   10.50
   5   6   5   39.30   16.90
  -6   6   5   78.99   19.00
   6   6  -5  118.59   17.10
   6   6  -5   96.59   21.00
   6  -6   5   60.39   22.30
   6  -6   5  159.78   28.30
   6   6   5  112.19   21.70
   6   6   5  111.59   18.70
   6   6   5   53.29   25.20
   6   6   5   86.69   20.70
  -6  -6   5   61.99   32.50
   6  -6  -5  161.68   35.40
   6   6   5   97.29   16.70
   7   6  -5   99.99   22.00
   7   6  -5  127.69   19.60
   7  -6   5  162.88   29.20
  -7   6   5   94.59   21.50
   7   6   5  126.29   20.50
   7  -6  -5  186.18   33.10
   7   6   5   68.99   25.60
   7   6   5  115.39   18.80
   7  -6  -5  123.59   35.00
   8   6  -5   45.80    9.10
   8   6  -5   78.09   13.20
   8   6  -5   80.29   17.00
   8  -6   5   44.60   13.40
   8   6   5   49.90   10.00
   8   6   5   43.20    8.50
   8  -6  -5   43.40   22.20
   8  -6  -5   18.30   11.60
   9   6  -5    2.40    3.10
   9  -6   5   -1.70    6.00
   9   6  -5    7.50    6.50
   9  -6   5   -5.00    5.70
   9  -6  -5    6.90   19.10
   9  -6  -5   -1.50    9.10
   9   6   5    3.50    2.40
   9   6   5    0.00    3.60
   0   7  -5    5.30   10.60
   0   7   5   11.40    8.80
   0  -7   5  -24.30   22.90
   0   7   5   16.00    6.60
   0  -7  -5   20.00   46.60
   0  -7  -5  -15.80   20.70
   0   7   5   -5.30    9.80
   0   7  -5   -7.20   10.50
   0  -7   5    2.00   20.70
  -1  -7  -5   16.70   68.59
  -1  -7  -5   92.59   29.70
   1   7  -5   93.19   16.50
   1  -7   5   52.09   29.10
  -1   7   5   86.59   17.30
  -1   7   5   81.99   16.10
  -1   7   5   54.59   11.50
   1   7  -5   53.49   14.60
   1  -7   5   33.00   21.70
  -1  -7   5   38.70   29.30
   1   7   5   61.09   12.60
   1   7   5   64.49   13.70
   1   7   5   97.69   18.30
  -1   7  -5   28.60   17.20
   1  -7  -5   42.90   33.90
   1  -7  -5   40.10   23.20
  -1  -7   5   61.19   27.70
  -2   7   5   13.40   15.60
   2   7  -5   21.40   13.60
   2  -7   5  -20.10   23.20
  -2   7   5    7.70    7.00
   2   7  -5   18.90    8.50
  -2  -7  -5   35.50   28.30
   2   7  -5   19.90   11.60
   2  -7   5    1.30   17.70
  -2   7  -5    3.20   19.70
   2   7   5   27.50    9.20
   2   7   5   22.60    6.90
   2   7   5   19.20    8.80
  -2  -7   5   30.80   30.60
   2   7   5   54.79   19.70
   2  -7  -5   74.39   35.50
   2  -7  -5   -2.40   27.40
  -2  -7   5   21.20   35.10
   3   7  -5   24.00   11.80
   3   7  -5   10.20   10.00
   3   7  -5   16.00    8.30
  -3   7   5   11.50   24.40
  -3  -7  -5   33.80   31.60
  -3   7   5   17.70    7.70
   3   7   5   28.00    9.70
   3   7   5   20.20    8.90
   3   7   5  -21.40   32.10
   3  -7  -5   73.49   26.70
   3   7   5   23.20   15.00
  -3  -7   5   47.30   31.60
   3   7   5   29.80    7.30
  -3   7  -5    5.20   28.60
   4   7  -5    3.30    6.10
   4  -7   5    5.00   19.20
  -4  -7  -5    2.70   31.10
  -4   7   5   -6.50    8.00
   4   7  -5   10.40   10.30
   4  -7   5    5.40   26.20
  -4   7   5    3.90   35.50
   4   7  -5    0.80    6.50
   4   7  -5    0.60   13.90
  -4  -7   5    2.40   28.90
   4   7   5   -1.90   26.30
   4   7   5    2.60    5.60
   4   7   5    5.30    7.80
   4   7   5    9.30    8.90
  -4   7  -5    7.90   37.20
   4   7   5   -0.30    5.80
   4  -7  -5  115.89   49.99
   5   7  -5  115.69   24.40
   5   7  -5   58.69   15.00
   5  -7   5   49.30   23.30
  -5   7   5   58.19   14.70
  -5  -7  -5   42.30   32.20
  -5   7   5  123.49   55.29
   5   7  -5   71.79   14.30
   5   7   5   74.09   13.60
   5   7   5   67.49   12.90
   5   7   5   32.80   24.50
   5   7   5   75.29   16.30
  -5  -7   5   63.79   29.00
   5   7   5   98.59   18.00
   5   7   5   74.99   14.90
   6   7  -5   18.20    6.20
   6  -7   5    3.50   16.50
   6   7  -5   -0.10    9.00
   6   7  -5   46.40   14.20
   6  -7   5   16.20   17.70
   6   7   5   10.00   19.10
   6   7   5   20.30    6.20
  -6  -7   5   23.50   25.50
   6   7   5   20.60    8.20
   6   7   5   24.20   19.80
   7  -7   5   10.40   11.80
   7   7  -5   29.60   10.50
   7  -7   5   -6.40   13.40
   7   7  -5   12.30    4.30
  -7  -7   5    9.00   14.20
   7   7   5   15.70    3.90
   7  -7  -5   23.20   11.40
   7   7   5   18.90    5.60
   8   7  -5   23.00    8.10
   8  -7   5    9.50    7.90
   8   7  -5   10.90    3.50
   8  -7   5    6.30    7.80
   8   7  -5   24.10    7.50
   8   7   5    6.40    2.60
  -8  -7   5   -3.00   13.90
   8  -7  -5    9.40    8.00
   8   7   5    5.50    3.80
   0  -8   5   42.60   24.60
   0   8   5   25.50   11.20
   0  -8  -5   35.30   24.40
   0  -8   5   47.00   28.30
   0   8  -5   44.00   12.20
   0   8   5   39.50    8.60
   0   8   5   65.09   13.40
   0   8  -5   11.90   13.80
   0  -8  -5   32.70   45.90
   1   8  -5   34.90   17.80
  -1  -8  -5  127.89   29.80
  -1   8   5   71.09   15.80
   1   8  -5   81.29   13.80
  -1   8   5   74.39   13.00
   1  -8   5    7.80   25.50
  -1   8   5   60.39   16.40
  -1  -8  -5  -19.60   58.09
   1   8   5   72.29   13.00
   1   8   5   77.19   15.80
  -1  -8   5   38.70   26.30
   1  -8  -5   56.39   28.70
   1   8   5  106.49   17.50
  -1  -8   5   30.40   32.60
   1  -8  -5   26.30   35.30
  -1   8  -5   28.40   18.50
   2   8  -5  250.17   37.10
  -2   8   5  242.48   36.80
   2   8  -5  202.08   38.50
  -2   8   5  308.17   46.10
   2   8   5  242.18   38.10
  -2  -8   5  156.38   59.59
  -2  -8   5  202.58   54.89
   2   8   5  264.97   36.50
  -3   8   5    7.20    7.20
  -3  -8  -5   -9.70   24.40
   3   8  -5    7.70    6.80
  -3   8   5    0.80   26.70
   3   8  -5    2.30    7.40
   3   8  -5   15.70   14.10
   3   8  -5    5.80    9.70
   3   8   5    7.90    5.00
   3   8   5   -0.40   13.70
   3  -8  -5    6.10   27.70
  -3  -8   5    7.30   23.70
   3   8   5    3.40    7.10
   3   8   5    2.50    7.40
  -3   8  -5   -6.70   23.90
  -4   8   5   13.40   34.30
   4   8  -5    3.20    5.70
   4  -8   5   19.20   22.20
   4   8  -5   11.10    6.40
   4   8  -5   15.70    9.90
  -4  -8  -5   11.80   24.50
  -4   8   5   19.80    8.40
   4   8  -5   25.60   14.80
   4  -8   5    3.60   27.70
   4   8   5   -2.80    9.30
   4   8   5    6.30    6.00
   4   8   5    9.60    8.20
   4   8   5    2.40    4.80
  -4  -8   5   -5.00   23.20
   5   8  -5   70.69   15.50
  -5   8   5   99.09   17.50
  -5   8   5   21.30   41.00
   5   8  -5   71.49   15.00
  -5  -8  -5   28.00   29.20
  -5  -8   5   55.09   26.10
   5   8   5   88.19   19.80
   5   8   5   68.89   15.50
   5   8   5   84.29   16.90
   5   8   5   74.29   14.10
   6   8  -5   32.80    8.00
   6   8  -5   11.70    5.10
   6  -8   5    8.20   11.70
  -6  -8  -5    0.20   16.30
  -6   8   5   13.00    8.90
   6  -8   5   11.80   16.40
   6   8   5   24.90    7.30
   6   8   5   20.70    6.60
  -6  -8   5    5.30   15.20
   6   8   5   46.50    7.40
   6   8   5   24.70    5.30
  -7  -8  -5   29.90   17.10
   7   8  -5    6.90    5.40
   7  -8   5   -2.50    7.80
   7   8  -5    1.20    3.10
   7  -8   5   20.10   14.20
   7   8  -5   -2.60    7.60
   7  -8  -5    3.00    7.70
  -7  -8   5   15.00   12.10
   7   8   5    4.00    3.00
   7   8   5   -3.80    4.00
   8   8  -5   10.30    6.50
   8  -8   5    2.70    7.50
   8   8  -5    6.10    2.70
   8  -8  -5   20.50    7.20
   8   8   5    3.90    1.90
   8   8   5    0.60    2.90
   0   9   5   63.79   11.80
   0   9   5   72.99   14.90
   0   9  -5   88.19   14.70
   0   9  -5   61.49   23.10
   0  -9   5   12.10   37.50
   0  -9  -5  -15.80   36.60
   0   9   5   44.50   22.50
   0  -9  -5   62.49   28.10
  -1  -9  -5   34.30   23.90
  -1   9   5   46.60   20.20
   1   9  -5   43.40   11.20
   1  -9   5   32.50   59.49
  -1   9   5   52.69   23.30
   1   9   5   38.20    8.30
   1  -9  -5   92.39   32.30
  -1  -9   5   12.10   23.20
  -1   9  -5   52.19   21.80
   1  -9  -5   12.70   31.70
  -2  -9  -5  -84.99   78.69
  -2   9   5   62.19   11.60
  -2   9   5   26.50   26.00
  -2  -9  -5   50.59   25.00
   2   9  -5  105.79   23.20
   2   9  -5   82.99   14.70
  -2  -9   5   47.40   25.50
  -2  -9   5   32.30   51.59
   2  -9  -5   59.39   42.30
   2   9   5   57.49   12.30
   2   9   5   74.89   15.90
  -3   9   5   52.69   29.80
  -3   9   5   64.59   12.30
   3   9  -5   40.60   11.70
   3   9  -5   36.00    9.70
  -3  -9  -5  105.49   27.20
   3   9   5   74.09   12.10
   3   9   5   58.49   10.40
  -3  -9   5   15.30   20.30
  -3   9  -5   17.50   23.40
   3  -9  -5   17.60   42.30
   3   9   5   86.99   25.80
   4   9  -5   66.79   19.80
  -4   9   5   57.19   12.50
   4   9  -5   50.19   17.80
  -4   9   5   -5.90   30.40
   4   9   5   73.59   13.70
   4   9   5   79.59   13.50
  -4   9  -5   -1.70   25.10
   4   9   5   42.90   10.40
   4   9   5   55.09   10.60
   4   9   5   56.19   14.90
  -4  -9   5   52.69   31.30
   5   9  -5   12.00    9.00
   5   9  -5    4.00    6.00
  -5  -9  -5    0.50   16.10
   5  -9   5   56.09   20.00
  -5   9   5   -3.40    6.80
   5   9  -5   -0.60    4.60
   5   9   5    9.70    3.10
  -5  -9   5  -15.90   13.10
   5   9   5   19.10    6.20
   5   9   5    6.40    4.30
   5   9   5    6.00    6.50
  -6  -9  -5   16.70   13.50
   6   9  -5   11.10    4.10
   6   9  -5   28.80    8.70
   6  -9   5   10.60   14.20
   6   9   5   12.90    5.10
   6  -9  -5   -1.00    9.50
   6   9   5   15.20    3.80
   6   9   5   22.00    7.10
  -6  -9   5    0.80    9.80
  -7  -9  -5    4.80   11.60
   7   9  -5   -1.10    5.70
   7   9  -5    6.20    2.90
   7  -9  -5    2.30    6.90
  -7  -9   5    2.40    8.40
   7   9   5    5.40    3.70
   7   9   5    1.30    2.20
   0  10  -5    1.40    9.80
   0  10  -5  -34.50   33.10
   0  10   5    8.90   10.60
   0 -10  -5  -15.60   40.20
   0 -10   5   67.39   44.30
   0 -10  -5   23.40   31.20
   1  10  -5   33.70   12.90
  -1 -10  -5  -34.60   33.50
  -1  10   5   10.30    8.20
  -1  10   5  -12.90   26.40
  -1 -10  -5    2.50   53.69
   1  10  -5   10.80    7.70
  -1 -10   5   15.10   20.20
  -1 -10   5   50.19   47.10
  -1  10  -5  -32.30   31.60
   1 -10  -5    1.70   23.10
   1  10   5    4.40    8.70
  -2  10   5  -35.80   33.20
   2  10  -5   14.10   10.80
  -2  10   5    3.40    4.80
   2  10  -5   -7.70    6.40
   2 -10   5  -43.70  165.48
   2  10   5    0.90    3.70
  -2 -10   5  -15.40   14.10
   2  10   5    5.70    6.30
  -2  10  -5  -17.40   26.10
   2 -10  -5   17.50   26.70
   3  10  -5   19.30    5.70
   3  10  -5   19.20    9.50
  -3 -10  -5   15.00   19.70
  -3  10   5   11.70    5.90
  -3 -10   5    1.20   12.80
  -4 -10  -5   65.99   17.70
   4  10   5   56.29   10.10
   4  10   5   90.79   16.30
   5  10  -5    8.40    6.80
  -5 -10  -5    6.00   13.00
   5  10   5    1.30    5.80
   5  10   5    1.70    6.30
  -5 -10   5   -3.40    8.70
   5  10   5   -0.10    3.40
   0  11  -5  -17.20   16.50
  -1 -11  -5   21.10   22.60
  -1  11   5   10.10    3.80
   1  11  -5    6.40    9.50
   1  11   5   14.10    3.60
  -2 -11  -5   17.20   17.70
  -2  11   5   38.10    6.30
   2  11  -5   29.20   10.90
   2  11   5   27.70    5.30
  -2 -11   5   11.70   15.70
  -3  11   5   25.50    9.20
  -3 -11  -5   -0.70   12.70
   3  11  -5   10.30    7.70
   3  11   5   18.10    3.70
   3  11   5   24.00    5.90
  -3 -11   5    8.50   13.20
   4  11  -5   -3.20    8.00
  -4 -11  -5    5.60   12.60
  -4 -11   5   -7.00   15.00
   4  11   5    5.40    2.50
   4 -11  -5   15.60   11.20
   4  11   5    2.60    5.20
   0   0   6 9487.35 1411.46
   0   0   6 9999.00 1418.16
   1   0  -6  288.37   47.10
  -1   0  -6  292.57   50.69
  -1   0   6  363.96   47.30
   1   0  -6  277.47   47.90
  -2   0  -6  459.25   74.49
  -2   0  -6  462.65   83.09
   2   0  -6  583.94   77.99
  -3   0   6  206.08   35.10
  -4   0   6  237.48   43.10
   5   0  -6    7.90   12.80
   5   0   6   11.30   10.50
   5   0   6    5.90   20.00
   6   0   6  151.38   27.00
   6   0   6  125.99   34.70
   6   0   6  175.88   34.50
   6   0  -6  155.18   27.70
   6   0  -6  151.68   33.30
   6   0   6  125.79   25.70
   7   0  -6  126.69   26.40
   7   0  -6  157.78   28.10
   7   0  -6  166.58   31.30
   7   0   6  124.19   30.10
   7   0   6  144.19   26.00
   7   0   6  123.39   28.90
   8   0   6  217.58   31.00
   8   0  -6  236.98   37.90
   8   0  -6  185.08   32.40
   8   0   6  159.28   32.30
   8   0   6  149.69   33.20
   9   0  -6   -0.30    9.20
   9   0   6   22.00    7.70
   9   0  -6   18.10   13.00
   9   0   6   12.20    8.70
   9   0   6   -0.10    9.30
  10   0  -6   -7.80    6.50
  10   0  -6    6.80    8.80
  10   0   6    1.60    6.40
   0   1  -6   85.09   15.40
   0   1  -6  139.79   32.90
   0   1  -6   72.09   17.40
   0  -1  -6   75.79   18.70
   0   1   6   70.89   14.80
   0  -1   6  135.29   69.29
  -1  -1  -6  201.08   36.60
   1   1  -6  201.78   31.20
   1   1  -6  180.98   29.50
  -1   1   6  164.18   29.50
  -1  -1   6  305.77  116.59
   1  -1  -6  196.88   31.80
  -1  -1   6  148.89   30.20
  -1   1  -6  210.58   30.00
   1  -1  -6  184.88   31.20
  -1   1  -6  229.38   33.90
   2  -1   6 2029.70  311.67
   2  -1   6 1957.70  289.67
  -2   1   6 2210.88  291.57
   2   1  -6 1810.72  291.07
  -2  -1   6 1927.31  374.06
  -3   1   6   73.79   17.70
   3  -1   6   86.89  112.09
  -3   1   6   53.09   15.60
   3   1  -6   44.80   11.10
  -3  -1  -6   79.89   11.40
  -3   1   6  109.19   19.00
   3   1  -6   91.39   16.30
  -3  -1  -6   78.99   52.29
  -3  -1   6   65.49   17.40
  -3  -1   6   61.79   20.50
  -3   1  -6   22.10   21.50
   3  -1  -6   54.19   12.60
  -3   1  -6  114.89   63.99
  -4   1   6  139.99   32.90
  -4   1  -6  399.16  121.59
  -4  -1   6  186.88   36.90
  -5   1   6   39.90   32.20
   5   1  -6  102.69   19.50
   5  -1   6  149.19   35.90
   5   1  -6  110.09   24.40
   5  -1  -6  142.39   24.90
   5  -1  -6  115.49   25.40
   5   1   6  146.69   28.80
   5   1   6  104.59   20.20
   5   1   6  108.89   21.00
   6  -1   6   77.59   21.60
   6   1  -6   61.79   14.10
   6  -1   6   75.59   16.80
   6   1  -6   89.99   21.70
   6  -1   6  112.59   22.30
   6  -1  -6   89.69   19.20
   6   1   6  147.29   26.90
   6   1   6   68.49   16.00
   6   1   6   86.79   24.70
   6   1   6   75.99   14.90
   6  -1  -6  108.39   25.80
   7   1  -6  187.18   34.20
   7  -1   6  223.98   38.50
   7  -1   6  207.78   40.10
   7  -1   6  215.38   36.10
   7   1  -6  239.88   37.10
   7   1   6  236.68   34.80
   7   1   6  208.68   40.40
   7  -1  -6  229.98   38.00
   7   1   6  167.78   41.30
   7   1   6  235.78   35.00
   7  -1  -6  238.98   39.10
   8  -1   6    5.50   11.60
   8  -1   6   13.30   11.60
   8   1  -6   24.10   11.30
   8  -1   6   -0.20   10.10
   8   1  -6   30.10   15.60
   8   1  -6   31.10    8.10
   8   1   6   13.90   13.00
   8  -1  -6   13.40   12.90
   8  -1  -6   26.10   11.50
   8   1   6   23.60    9.00
   8   1   6    8.20    9.40
   8   1   6   18.80   15.80
   9  -1   6   32.80    9.90
   9   1  -6   29.90    9.20
   9   1  -6   39.80   11.80
   9  -1   6   11.90    8.90
   9  -1  -6   30.60   10.90
   9   1   6   20.20    9.80
   9   1   6   25.70    7.40
   9  -1  -6   34.20   13.90
  10  -1   6   20.90   10.70
  10   1  -6    5.00    6.00
  10   1  -6   20.60    9.10
  10  -1   6    7.70    6.30
  10   1   6   -4.80   11.60
  10  -1  -6    8.40    7.90
  10   1   6   -7.60    6.50
  10  -1  -6   -6.20    5.50
   0   2  -6 1230.18  182.38
   0   2  -6 1250.97  189.68
   1   2  -6  389.06   52.59
  -1  -2  -6  291.37   54.69
   1   2  -6  348.37   50.89
  -1  -2  -6  322.97   57.09
  -1   2   6  324.97   51.49
   1   2  -6  326.97   61.29
  -1   2  -6  347.27   54.59
   1  -2  -6  346.27   53.09
   2  -2   6  439.76   62.09
  -2   2  -6  314.37   67.49
   2  -2  -6  687.73  204.28
  -2   2  -6  526.95   89.79
   3  -2   6   32.00  124.29
   3   2  -6   18.60    8.00
  -3   2   6   21.00   16.80
   3   2  -6   13.80    4.70
  -3   2   6   25.10   13.90
  -3   2   6    7.90   12.80
  -3  -2  -6   23.30   35.80
  -3  -2   6    7.00   16.00
   3  -2  -6   33.90  246.48
   3  -2  -6    2.50    7.70
  -3   2  -6  -50.79   58.79
   4  -2   6  619.64  336.67
  -4   2   6  518.45   79.59
   4  -2  -6  845.42  437.56
  -4  -2   6  459.25   80.09
   5  -2   6  131.49   26.20
   5   2  -6   78.79   17.50
   5  -2   6  126.09   24.80
   5   2  -6   88.39   23.10
   5   2   6  125.29   27.40
   5  -2  -6  127.09   24.50
   5   2   6   94.09   18.30
   5   2   6   77.39   17.60
   5  -2  -6  116.39   23.60
   6   2  -6  262.77   38.80
   6  -2   6  281.17   42.20
   6  -2   6  302.87   47.80
   6  -2   6  210.18   40.60
   6   2  -6  246.08   41.50
   6   2   6  273.37   39.00
   6   2   6  209.78   47.80
   6  -2  -6  261.47   43.70
   6   2   6  239.48   39.40
   6  -2  -6  234.58   44.10
   7  -2   6    7.50   13.00
   7  -2   6  -13.70   15.10
   7   2  -6   -2.10   10.70
   7  -2   6    3.00   11.50
   7   2  -6   -2.60   15.00
   7   2  -6    8.20    6.90
   7  -2  -6   -8.70   12.50
   7   2   6   -2.10    8.70
   7   2   6   -3.10    7.10
   7  -2  -6    3.70   12.40
   7   2   6   25.10   17.50
   8   2  -6   35.30   10.90
   8   2  -6   13.30    7.60
   8  -2   6   11.70   10.80
   8  -2   6   40.10   11.20
   8  -2   6   24.60   13.30
   8   2   6   34.00    8.30
   8   2   6   19.90    8.70
   8  -2  -6   10.30   11.30
   8  -2  -6    9.90   12.10
   8   2   6   10.80   13.60
   9   2  -6    1.50    7.30
   9   2  -6   13.50   10.30
   9  -2   6    8.60    8.30
   9  -2   6    0.60    7.60
   9   2   6    0.60    6.20
   9   2   6   20.00    6.10
   9  -2  -6    6.40   10.00
   9   2   6   10.40    8.20
  10  -2   6    5.20    7.10
  10  -2   6    0.70    9.10
  10   2  -6   15.40    7.30
  10   2   6    2.40    7.30
  10   2   6   21.20    7.40
  10  -2  -6   10.00    7.50
   0   3  -6    6.80    8.40
   0  -3  -6   68.99  137.49
   0  -3   6  -18.40   47.10
   0  -3  -6   21.70   16.80
   0   3   6   16.20    6.60
   0  -3   6    5.80   10.30
   0   3  -6   26.80   28.90
   1   3  -6  122.19   40.40
  -1   3   6  127.79   27.00
   1   3  -6  183.38   28.60
   1   3  -6  159.48   25.00
  -1  -3  -6  200.08   40.90
  -1  -3  -6  448.76  129.69
   1  -3  -6  121.89   30.30
  -1   3  -6  193.48   49.60
   1  -3  -6   21.40   68.39
   1  -3  -6  499.55  186.18
  -1   3  -6  186.08   28.70
  -2   3   6  101.29   20.30
   2  -3   6  422.76  168.48
   2   3  -6   86.89   15.80
  -2  -3  -6  227.88   89.39
   2  -3  -6  121.09   75.59
  -2   3  -6  143.89   25.40
  -2   3  -6  117.49   53.89
   2  -3  -6  104.29  216.88
  -2  -3   6   63.29   22.20
   2  -3  -6  101.09   20.70
   3  -3   6  337.77   48.30
  -3   3   6  261.97   52.49
   3  -3   6  625.64  204.48
  -3   3  -6  408.96   95.99
   3  -3  -6  613.14  337.57
  -3   3  -6  326.97   69.79
   4   3  -6  121.79   20.80
  -4   3   6  126.09   31.60
   4  -3   6  136.39   32.90
   4  -3  -6  242.98  526.05
   4   3   6  163.18   32.60
  -4  -3   6   94.19   60.09
   4   3   6  127.49   21.50
   4  -3  -6  139.59   22.70
   4   3   6  132.29   24.30
   4  -3  -6  149.99   35.60
   5   3  -6  221.68   34.90
   5  -3   6  271.07   38.90
   5   3  -6  185.78   37.90
   5  -3   6  164.58   41.30
   5   3  -6  204.48   31.30
  -5   3   6  236.38   70.79
   5   3   6  200.58   31.60
   5   3   6  161.58   37.10
   5  -3  -6  206.18   40.00
   5  -3  -6  210.38   42.30
   5   3   6  197.88   32.50
   6   3  -6  182.18   30.70
  -6   3   6  323.97   73.69
   6  -3   6  125.29   31.50
   6   3  -6  163.98   30.40
   6  -3   6  191.38   40.70
   6  -3   6  176.18   32.90
   6   3   6  198.18   28.70
   6   3   6  175.88   29.30
   6  -3  -6  213.78   49.10
   6  -3  -6  161.38   34.20
   7  -3   6   15.70   13.20
  -7   3   6  -18.80   52.49
   7  -3   6   10.10   16.20
   7   3  -6   10.10   13.00
   7   3  -6   16.10   12.00
   7  -3   6   -4.10   11.20
   7   3  -6   11.40    7.20
   7  -3  -6   -7.50   12.50
   7   3   6   16.80    7.00
   7  -3  -6   25.30   19.10
   7   3   6   12.90    8.10
   7   3   6   14.60   17.90
   7  -3  -6   16.90   14.10
   8  -3   6   15.80   12.80
   8  -3   6    6.80   10.50
   8   3  -6   10.70    6.90
   8   3  -6   27.80   11.70
   8   3  -6   33.60   13.40
   8   3   6   15.70    7.10
   8  -3  -6    3.30   13.80
   8   3   6   21.80    8.50
   8  -3  -6    2.50   10.90
   8  -3  -6   22.20   23.90
   8   3   6   -9.70   12.80
   9   3  -6   36.70   10.30
   9  -3   6   33.00   10.00
   9   3  -6   45.70    9.10
  -9   3   6   38.60   26.20
   9   3   6   41.60    7.40
   9   3   6   17.40    9.60
  10  -3   6    3.70    7.10
  10   3  -6    9.20    6.90
  10  -3   6   -0.90    7.40
  10   3   6   -0.40    5.00
  10  -3  -6   -9.60    7.40
  10  -3  -6  -11.80    6.90
   0   4  -6   75.09   17.80
   0  -4  -6   80.19  229.38
   0  -4  -6   96.19   25.90
   0  -4   6   92.79   18.30
   0   4  -6   50.79   43.50
  -1  -4  -6  336.57  234.98
  -1  -4  -6  196.58   38.50
   1   4  -6  116.79   49.90
   1   4  -6  137.79   23.90
   1  -4   6  165.88   26.50
  -1   4   6  120.99   26.90
  -1   4  -6  144.59   27.70
   1  -4  -6  244.28  262.97
   1  -4  -6  169.48   32.20
  -1   4  -6  134.79   55.69
  -2   4   6   59.59   15.60
   2   4  -6   68.19   12.90
   2  -4   6   78.69   17.40
  -2  -4   6   88.69   23.50
   2  -4  -6  405.26  337.47
  -2  -4   6   20.10   25.00
  -2   4  -6   57.19   52.19
  -2   4  -6  121.89   20.70
   2  -4  -6   70.49   20.90
  -2   4  -6  113.99   23.50
  -3   4   6   13.20   15.80
  -3   4   6   29.70   21.40
   3  -4   6   -1.50  375.56
  -3   4   6   28.10   19.10
   3  -4   6   37.00   11.10
  -3   4  -6   36.90   28.50
   3  -4  -6   26.50  472.45
   3  -4  -6   13.60   14.70
  -3  -4   6   17.40   39.30
  -3   4  -6   24.60   16.80
  -3   4  -6  -51.09  142.39
   4   4  -6  183.58   29.40
   4   4  -6  132.09   23.20
  -4   4   6  160.78   35.70
   4  -4   6  195.38   38.60
   4  -4   6  131.89   28.40
   4   4  -6  164.78   28.70
   4   4   6  153.08   26.30
   4   4   6  131.79   26.70
   4   4   6  159.18   23.70
   4   4   6  101.29   34.50
   4  -4  -6  135.39   34.70
   5  -4   6   12.10   16.60
   5  -4   6    4.50   16.80
   5   4  -6    2.10   11.90
   5   4  -6   17.80    6.20
   5   4  -6    0.00   13.00
  -5   4   6  -31.70   45.20
   5  -4  -6   -7.70   14.30
   5   4   6    1.90    6.20
   5   4   6   15.20    8.50
   5   4   6    2.50   11.30
   5  -4  -6   13.10   21.20
   5   4   6    9.40   21.30
   6  -4   6  263.67   56.39
   6  -4   6  362.66   53.19
   6   4  -6  347.17   52.99
   6   4  -6  326.47   49.90
   6   4  -6  378.16   52.99
   6   4   6  340.57   53.89
   6   4   6  342.87   49.80
   6   4   6  316.27   50.59
   6  -4  -6  320.57   62.59
   7  -4   6    7.40   13.70
   7   4  -6    8.60   11.50
   7   4  -6   14.40    6.50
   7   4  -6    0.60   11.30
   7   4  -6    9.20   13.20
  -7   4   6  -16.40   50.09
   7  -4   6   -0.50   12.00
   7  -4  -6   46.20   19.00
   7   4   6    7.10    5.70
   7   4   6  -12.40   15.30
   7  -4  -6   -2.80   13.30
   7   4   6    6.80    7.30
   7  -4  -6    8.50   17.80
   8  -4   6   72.39   20.10
  -8   4   6  177.68   42.00
   8   4   6   73.69   21.20
   8   4   6  100.69   17.90
   9   4  -6   12.70    4.50
   9  -4   6   -4.70    7.60
   9   4  -6    8.90    8.30
   9  -4   6    2.60    7.10
   9   4   6   10.90    4.40
   9   4   6    8.10    4.10
   9  -4  -6    9.70   11.60
   9   4   6    8.60    8.10
   0  -5  -6   76.39   29.60
   0   5  -6   60.39   64.69
   0   5  -6   67.79   14.40
   0  -5  -6   88.89  422.06
   0  -5   6   34.60   16.80
  -1   5   6  161.28   34.80
  -1   5   6  188.38   29.00
  -1   5  -6   61.49   76.09
   1  -5  -6  795.82  468.55
  -1   5  -6  167.48   33.60
   2   5  -6  136.09   23.20
   2   5  -6  100.59   22.20
  -2   5   6  138.09   30.20
   2   5   6  107.49   40.60
   2   5   6  125.19   25.50
   2  -5  -6  681.23  558.04
  -2  -5   6  191.28   38.40
  -2   5  -6  106.29   25.50
  -2  -5   6   69.69   29.20
   2  -5  -6   65.99   25.30
   2   5   6  118.89   21.00
   3   5  -6  135.69   25.60
  -3   5   6  190.78   31.90
   3   5  -6  144.79   31.90
   3   5  -6  143.99   21.80
   3   5  -6  129.19   23.20
   3   5   6  129.29   21.50
   3   5   6  158.38   26.90
   3   5   6  120.19   23.70
   3   5   6  143.79   40.50
   3   5   6  115.19   23.50
  -3   5  -6   93.69   36.50
   3  -5  -6   86.49   27.40
   4   5  -6  188.38   31.70
   4   5  -6  169.48   28.10
   4   5  -6  211.88   35.50
   4   5  -6  182.68   28.50
  -4   5   6  249.68   57.89
   4  -5   6  243.48   40.60
   4   5   6  160.48   29.60
   4   5   6  177.48   29.60
   4   5   6  157.68   27.70
   5   5  -6   95.19   16.90
   5   5  -6  100.59   19.30
   5  -5   6  133.59   25.10
  -5   5   6  162.68   40.50
   5   5  -6  124.39   24.20
   5   5   6  102.79   20.70
   5   5   6   84.19   18.50
   5   5   6   78.39   16.60
   5   5   6   34.50   27.00
   6   5  -6   80.49   18.50
   6   5  -6   65.69   17.20
   6   5  -6   85.29   15.10
   6  -5   6   60.69   20.60
   6  -5  -6   73.59   28.30
   6   5   6   74.69   14.10
   6   5   6  106.99   18.40
   6   5   6   84.99   15.80
   6   5   6   50.99   22.30
  -7   5   6   71.49   39.50
   7  -5   6   44.40   15.60
   7   5  -6   33.70   12.10
   7   5  -6   32.20   11.90
   7  -5   6   79.99   16.40
  -7   5   6   43.60   14.60
   7  -5  -6   28.60   14.00
   7   5   6    3.10   14.50
   7   5   6   50.19    9.70
   7  -5  -6   37.40   22.40
   8   5  -6   75.99   13.10
   8   5   6   75.09   13.00
   8   5   6   65.09   12.10
   8  -5  -6   72.99   22.10
   9   5  -6   15.20    8.40
   9  -5   6    2.90    6.40
   9   5  -6   10.40    3.80
   9  -5   6   21.40    8.40
   9   5   6   11.80    3.70
   9  -5  -6   18.80   16.50
   9   5   6    5.00    3.00
   9  -5  -6    3.00    7.40
   9  -5  -6   -9.60   14.00
   0  -6   6   19.60   24.90
   0  -6  -6   36.90   27.70
   0   6   6   46.50   12.30
   0   6  -6   23.70   14.50
   0  -6  -6   15.10   44.70
   0   6   6   31.80    8.70
   0   6   6   35.70   11.20
   1  -6   6  140.39   37.70
  -1   6   6  208.78   34.20
   1   6  -6  213.28   34.60
  -1  -6  -6   80.19   57.49
   1   6   6  210.18   31.40
   1  -6  -6  141.29   55.69
  -1  -6   6  240.88   47.50
   1   6   6  213.88   52.39
   1   6   6  220.98   33.00
  -1  -6   6  236.78   68.59
  -2  -6  -6    9.10   63.69
  -2   6   6   35.10   15.90
   2   6  -6   23.00   11.20
  -2   6   6    8.90   14.10
   2  -6   6   -5.80   16.50
   2   6  -6   14.60   10.30
   2   6  -6    4.80    9.30
   2   6  -6   14.60    8.60
   2  -6   6   11.20   17.70
  -2   6   6    7.50    6.40
  -2  -6   6   23.20   33.20
   2   6   6    2.00    7.50
   2   6   6   14.10   40.10
   2   6   6   10.20    6.60
  -2   6  -6   -7.90   23.10
   2   6   6   -1.90   17.80
  -2  -6   6  -28.30   42.30
   2   6   6    6.60    8.30
   2  -6  -6   56.49   33.40
   2  -6  -6   19.20   25.80
   3   6  -6    1.00    7.20
   3  -6   6   15.30   17.40
   3   6  -6    0.80    8.50
   3   6  -6  -10.60   17.00
  -3   6   6   31.60   22.70
  -3   6   6    5.80    6.60
   3   6  -6    1.90   11.40
  -3   6   6   17.00   29.40
   3  -6   6   -8.20   15.80
   3   6   6   -1.20    8.00
   3   6   6   -5.70    7.00
   3  -6  -6   -4.70   14.80
  -3  -6   6    4.80   32.80
  -3   6  -6    5.00   33.30
   3   6   6   10.20   12.70
   3   6   6   20.90   33.40
   3  -6  -6  -18.40   22.80
   3   6   6    5.20    6.80
   4   6  -6   32.90    9.80
   4  -6   6  126.39   43.20
   4   6  -6   58.59   16.70
  -4   6   6   30.70   10.20
   4   6  -6   43.60    9.40
  -4   6   6   47.30   37.10
   4   6  -6   47.70   14.40
   4  -6   6   19.00   15.60
  -4   6  -6   14.30   43.90
   4   6   6   31.40   26.50
   4   6   6   35.00   10.40
   4  -6  -6   81.79   37.80
  -4  -6   6   76.29   38.40
   4   6   6   53.89    9.30
   4   6   6   57.09   12.40
   5  -6   6   97.79   26.60
   5   6  -6  113.29   18.50
  -5   6   6   89.29   19.20
   5   6  -6  119.39   23.70
  -5   6   6   68.09   55.59
  -5  -6   6  126.89   40.70
   5   6   6  113.59   18.20
   5   6   6   65.29   27.20
   5   6   6  124.69   20.50
   5   6   6  112.29   21.10
   6   6  -6   75.99   12.70
   6  -6   6   74.59   20.40
   6   6  -6   53.99   14.20
  -6   6   6   43.50   14.90
   6   6   6   35.90   19.20
   6   6   6   70.89   13.10
   6   6   6   65.19   12.00
   6   6   6   57.49   14.00
  -6  -6   6   35.40   30.00
   7   6  -6    3.30   21.00
  -7   6   6   -1.20   10.80
   7  -6   6   -5.20   15.10
   7   6  -6    6.80    7.30
   7  -6  -6    2.40   25.50
   7  -6  -6   18.00   21.70
   7  -6  -6   -7.10   18.40
   7   6   6   -0.30   11.80
  -7  -6   6    5.80   20.50
   7   6   6   -1.30   11.10
   8   6  -6   21.90    8.90
   8  -6   6   10.00    7.30
   8  -6   6    8.70    9.50
   8   6  -6   18.90    4.50
  -8  -6   6   15.90   15.20
   8   6   6    9.40    3.80
   8  -6  -6   25.60   10.70
   8   6   6   19.40    5.00
   8  -6  -6   21.90   25.50
   9  -6   6    1.00    6.70
   9  -6   6    2.50    5.50
   9   6  -6   -0.60    7.40
   9   6  -6    1.60    3.00
   9   6   6   -4.90    3.50
   9   6   6   -0.90    2.00
   0  -7  -6   71.79   56.79
   0   7   6  248.68   33.30
   0   7   6  166.88   36.90
   0   7   6  189.38   30.50
   0  -7   6  221.28   46.50
  -1  -7  -6   -5.70   26.90
   1   7  -6    4.30   10.30
   1   7  -6   12.50   10.60
  -1   7   6   24.30   10.70
  -1   7   6   15.50   10.30
   1  -7   6   39.10   22.60
   1  -7   6   26.80   26.60
  -1  -7  -6  -52.59   61.29
  -1   7  -6   15.20   15.90
  -1  -7   6   16.20   34.00
   1  -7  -6  -44.10   35.60
   1  -7  -6   29.10   23.30
   1   7   6   19.80    9.70
   1   7   6   17.20    9.00
   1   7   6   21.00   11.40
  -1  -7   6    8.30   26.30
  -2  -7  -6   58.99   36.40
   2  -7   6   -5.70   20.50
  -2   7   6   12.20    6.50
  -2  -7  -6  -68.29   70.09
  -2   7   6   15.60   15.80
   2   7  -6    9.30   15.70
  -2   7   6   20.90   13.10
   2   7  -6   18.40   11.10
   2   7  -6   11.90   10.00
   2   7   6   17.60    9.00
  -2  -7   6   -8.20   38.10
   2   7   6   12.30   42.90
   2  -7  -6   88.79   36.50
  -2  -7   6    2.70   27.30
  -2   7  -6   -1.40   21.10
   2   7   6    5.30    8.20
   2  -7  -6   19.00   27.20
   2   7   6    4.80   10.10
   3  -7   6   10.30   19.20
   3   7  -6   20.70    8.10
  -3  -7  -6   12.90   30.00
  -3   7   6   11.50    7.10
   3   7  -6    8.70    7.80
   3   7  -6   12.80   11.40
  -3   7   6    8.00   24.50
   3   7  -6    6.50   24.50
  -3   7  -6    2.10   28.40
   3   7   6   28.40   13.30
   3  -7  -6   18.30   25.50
   3   7   6   21.10    8.70
   3   7   6   26.10    7.30
   3   7   6  -11.10   29.50
  -3  -7   6    8.00   29.60
   3   7   6   24.00    6.70
   4   7  -6  228.18   39.20
   4   7  -6  234.78   36.40
  -4   7   6  319.57   64.89
  -4   7   6  204.28   36.70
   4   7  -6  261.07   36.70
   4   7   6  262.97   38.60
   4   7   6  151.18   44.50
   4  -7  -6  346.07  112.09
   4   7   6  246.58   36.00
   4   7   6  219.68   36.00
   4   7   6  269.67   37.40
  -4  -7   6  218.88   53.49
  -5  -7  -6  158.58   36.60
  -5   7   6   58.69   50.49
   5   7  -6  106.89   21.90
  -5   7   6  126.49   19.20
   5   7  -6  105.69   18.10
   5  -7   6   74.19   26.30
  -5  -7   6   68.49   28.90
   5   7   6  100.49   18.30
   5   7   6  102.89   19.00
   5   7   6   99.59   26.30
   5   7   6  116.09   20.40
   5   7   6   92.19   24.50
   5   7   6   96.39   17.30
   6  -7   6    2.60   16.40
   6   7  -6    4.90    6.20
  -6   7   6    1.10   15.30
  -6  -7  -6  -13.70   24.90
   6   7  -6    8.90   10.30
   6  -7   6    3.20   28.70
   6   7  -6    8.30   16.00
   6   7   6   -0.60    9.30
   6   7   6    2.60    7.60
   6   7   6    2.00    5.10
   6   7   6   15.30   16.90
  -6  -7   6   11.50   21.40
   7   7  -6   11.80   10.10
   7   7  -6   14.10    6.90
  -7   7   6   32.30   15.40
   7  -7   6   -1.00   10.30
   7  -7   6   16.70   11.40
   7   7  -6   19.40    4.50
   7  -7  -6   13.00   10.20
   7   7   6   23.80    5.50
  -7  -7   6    3.60   14.60
   8  -7   6    1.70   11.10
   8   7  -6   32.30    5.50
   8   7  -6   19.70    8.10
   8  -7  -6   34.70   10.60
   8   7   6   32.00    6.70
  -8  -7   6   11.30   11.40
   8   7   6   29.10    5.30
   0  -8   6   -9.70   33.00
   0   8   6   10.30    9.80
   0  -8  -6    1.30   26.90
   0  -8  -6   -7.90   44.20
   0   8  -6   -2.20   13.60
   0   8   6   16.20   12.50
   0  -8   6  -12.90   21.40
   0   8   6   14.00    5.50
  -1   8   6   31.50   11.90
   1   8  -6   47.80   10.90
   1  -8   6  -15.50   27.20
  -1   8   6   27.40   14.00
  -1  -8  -6   79.69   30.70
  -1  -8  -6  -47.40   51.49
  -1   8   6   46.30    7.80
   1   8  -6    6.70   17.50
   1  -8   6   29.90   40.40
   1  -8  -6   86.39   32.40
  -1   8  -6  -18.30   16.60
   1   8   6   23.20    6.70
   1   8   6   27.50    9.30
  -1  -8   6   24.70   24.70
   1  -8  -6   -2.30   35.70
  -1  -8   6   49.50   35.00
  -2  -8  -6  -95.29   71.19
  -2   8   6   -0.90    5.60
   2   8  -6    2.40   15.40
   2  -8   6   -5.60   25.70
   2   8  -6   12.00    8.00
   2   8  -6   -6.60    8.40
  -2   8   6   18.90   18.30
  -2  -8  -6   36.20   27.90
  -2  -8   6   -7.80   24.10
  -2   8  -6   -7.60   19.10
   2   8   6    9.50    5.40
   2  -8  -6   29.00   28.50
  -2  -8   6   38.90   48.80
   2   8   6   14.30    8.10
   3   8  -6   62.99   12.40
  -3   8   6   57.39   12.00
  -3  -8  -6   94.19   29.00
   3   8  -6   82.69   15.10
   3   8  -6   82.99   15.50
  -3   8   6   37.70   28.40
   3   8   6   72.79   14.90
  -3  -8   6   83.89   29.50
   3   8   6   69.69   18.00
   3  -8  -6   23.10   28.20
   3   8   6   58.79   12.40
   3   8   6   79.39   15.00
  -3   8  -6    1.40   26.40
  -4   8   6   40.10    8.80
  -4  -8  -6   30.20   24.00
   4   8  -6   18.90   10.20
  -4   8   6  -12.90   34.60
   4  -8   6   -0.20   19.70
   4   8  -6   35.20    8.30
   4   8   6   27.90    7.30
  -4   8  -6   43.00   34.60
   4   8   6   27.80    6.40
   4   8   6   28.50    8.70
   4   8   6   13.70   10.80
  -4  -8   6   -0.30   21.00
  -5   8   6   27.60   11.40
   5  -8   6   19.50   23.30
   5   8  -6    4.80    8.90
  -5   8   6  -26.50   37.60
   5  -8   6   22.00   17.70
   5   8  -6   16.60   11.90
  -5  -8  -6   11.10   22.10
   5   8   6   24.50    7.80
   5   8   6   10.00    4.40
   5   8   6    3.70   11.10
  -5  -8   6    5.00   21.40
   5   8   6    8.00    8.80
  -6  -8  -6   -3.70   14.60
   6   8  -6    5.90    5.80
   6  -8   6  -12.00   14.10
   6   8  -6    9.80    4.40
   6  -8   6  -16.50   13.40
  -6   8   6    3.40    8.10
   6   8  -6   15.00   10.40
   6   8   6    9.70    3.80
   6   8   6    0.90    4.70
  -6  -8   6   -1.30   11.70
   7  -8   6   13.00   16.10
   7  -8   6   38.00   11.80
   7   8  -6   57.49    8.20
   7   8   6   55.39    8.60
   7  -8  -6   24.50    9.40
   7   8   6   38.20    7.20
   0  -9   6   -4.00   40.50
   0  -9  -6  -14.00   45.60
   0  -9   6   14.20   20.80
   0   9   6   42.30   20.80
   0  -9  -6   82.49   32.90
   0   9  -6   42.30   32.40
   0   9   6   51.19   12.90
   0   9   6   51.99    9.90
   1  -9   6  -11.10   35.10
  -1   9   6   27.50   20.50
  -1   9   6   22.80    5.80
  -1  -9  -6   16.00   26.90
   1   9  -6   36.80   16.10
   1   9  -6   33.00   10.10
  -1  -9  -6   -2.30   55.09
  -1   9   6    9.70   12.20
   1  -9  -6   42.80   31.40
  -1  -9   6   -8.00   18.90
  -1   9  -6   18.30   21.70
   1  -9  -6   -6.30   38.40
   1   9   6    2.40    7.30
  -1  -9   6  -11.10   43.60
   1   9   6   11.50    5.00
   2   9  -6   26.20    8.60
  -2  -9  -6   34.60   22.90
  -2   9   6   17.90    5.80
   2   9  -6   27.30   14.80
  -2   9   6   18.70   23.20
  -2  -9  -6   -1.70   80.29
  -2  -9   6  -10.10   54.69
   2   9   6   22.80    5.70
  -2   9  -6   -0.40   19.70
   2   9   6   27.20    8.70
   2  -9  -6    8.30   25.00
  -2  -9   6    4.40   19.60
  -3   9   6   20.10   29.30
   3   9  -6   69.19   24.20
  -3  -9  -6   44.00   25.90
  -3   9   6   38.10    8.90
   3   9  -6   29.20    9.50
   3   9   6   34.60    9.80
  -3   9  -6   23.80   23.00
   3  -9  -6   21.20   52.19
  -3  -9   6   -4.30   21.80
   3   9   6   29.10    6.80
   4   9  -6   11.10   12.00
  -4  -9  -6    0.50   16.00
   4   9  -6   -4.40    4.90
  -4   9   6   12.40    6.60
  -4   9   6  -18.80   31.40
   4   9   6    1.60    5.20
   4   9   6    5.90    3.10
   4   9   6    5.20    4.70
  -4   9  -6   -7.80   48.30
   4   9   6    2.90    5.30
  -4  -9   6  -13.90   13.70
   4   9   6   -6.90    8.00
  -5   9   6    3.20    7.50
  -5  -9  -6    8.00   12.60
   5   9  -6   -0.30    4.30
   5   9  -6    8.90    8.90
   5   9   6    6.40    5.90
   5   9   6   11.90    7.60
   5   9   6    5.40    3.40
  -5  -9   6   -3.90   10.80
   5   9   6    8.60    4.10
   6   9  -6   10.10    4.50
  -6  -9  -6    0.80   12.60
   6   9  -6    9.20    7.90
   6   9   6   -1.80    4.40
   6  -9  -6    4.10    8.70
   6   9   6    1.20    3.20
  -6  -9   6    8.00    8.90
   0 -10  -6   21.40   23.30
   0 -10  -6   31.50   40.50
   0  10   6   33.40    6.60
   0  10   6   29.10   11.50
   0 -10   6   92.29   52.29
   1  10  -6   46.60   13.40
  -1 -10  -6   55.49   26.30
  -1 -10  -6   34.10   91.49
  -1  10   6   28.30    6.20
  -1 -10   6    6.00   14.60
   1 -10  -6   30.60   29.70
  -1  10  -6   28.80   35.40
  -1 -10   6  -36.40   49.40
  -2  10   6  106.29   17.10
  -2  10  -6   73.09   46.10
   2  10   6  104.79   16.30
   2  10   6  109.29   18.60
  -3  10   6   12.00    5.20
  -3 -10  -6    7.50   14.90
   3  10  -6   20.60   10.60
  -3 -10   6   -0.30   13.00
   3  10   6   15.70    5.40
  -4  10   6   33.00    6.90
  -4 -10  -6   14.70   14.50
   4  10  -6   26.40    9.00
   4  10   6   15.70    4.10
  -5 -10  -6   -0.40   11.50
   5  10  -6   29.40    8.20
   5  10   6   22.50    4.60
  -5 -10   6    2.20    9.40
   0  11   6   18.70    4.10
  -1 -11  -6  152.58   50.99
   2  11  -6  -13.40   10.80
  -2 -11  -6   26.30   18.00
  -2  11   6   12.80    4.00
   2  11   6    7.60    2.70
   3  11  -6   47.90   11.40
  -3  11   6   44.90    8.40
  -3 -11  -6   54.09   17.20
   3  11   6   30.80    6.80
   3  11   6   38.50    8.30
  -3 -11   6   12.90   16.50
   0   0  -7   -5.20   23.80
   0   0  -7   -1.30   12.60
   0   0  -7    2.20    8.60
   0   0   7    3.00    7.30
   0   0   7   13.20    8.20
  -1   0  -7    8.20   16.20
  -1   0  -7    8.60    7.80
   1   0  -7    3.40   11.90
   1   0   7   -3.30    8.90
  -1   0   7  -58.89  105.19
  -1   0   7    6.70    7.00
   1   0  -7    7.50    9.20
  -1   0  -7   -7.60   27.80
  -1   0   7    5.20    7.20
   1   0  -7    4.50   21.90
  -2   0   7   -2.40   10.00
  -2   0   7    6.00    9.40
  -2   0  -7   29.90   41.60
  -2   0  -7   15.20   24.80
  -2   0  -7    6.60    8.30
   2   0  -7    4.10    7.50
  -2   0   7 -223.78  177.88
   2   0   7    3.30    6.30
   2   0  -7    0.90   16.60
  -3   0   7  377.86   60.59
  -4   0   7  289.27   53.49
   5   0  -7   10.00    8.10
   5   0   7   33.00   23.30
   5   0   7    5.20   22.00
   5   0  -7    3.70   14.50
   5   0   7    9.40    9.90
   5   0   7    2.70    9.10
   6   0   7   60.69   11.70
   6   0   7   52.69   21.50
   6   0   7   39.00   11.30
   6   0   7   38.90   19.30
   6   0  -7   26.30   18.80
   6   0  -7   56.09   15.30
   6   0  -7   20.80    9.00
   7   0   7    7.80   12.60
   7   0  -7   15.70    8.00
   7   0   7   20.10   14.30
   7   0   7   -2.30    8.30
   7   0   7   25.70   15.20
   7   0  -7   19.20   15.60
   7   0  -7   12.10   11.00
   8   0   7   19.00   12.60
   8   0  -7   30.10   11.00
   8   0   7   20.40    8.40
   8   0  -7   33.40   14.40
   8   0   7   10.80   12.00
   9   0   7   12.60    6.70
   9   0  -7    4.80    9.60
   9   0   7   31.50    9.70
   9   0   7   11.80    8.90
   9   0  -7    4.10    6.60
  10   0  -7    8.70    8.20
  10   0  -7    7.30    6.50
  10   0   7   -8.40    5.30
   0  -1   7  266.57  101.09
   0   1  -7  158.78   37.60
   0  -1  -7   80.89   22.00
   0   1  -7  105.49   21.10
   1   1  -7   85.29   22.60
   1   1  -7   85.19   20.70
   1  -1   7  115.49   61.49
  -1  -1  -7  146.59   27.40
  -1   1   7  143.99   21.20
   1   1  -7  177.28   40.90
  -1   1  -7  123.59   22.30
   1  -1  -7   92.39   23.00
  -1  -1   7  188.28  131.69
   2  -1   7  598.64   84.29
  -2   1   7  538.35   86.19
   2   1  -7  452.65   87.29
  -2  -1  -7  655.73   84.89
  -2  -1   7  653.53  246.78
   3   1  -7  160.18   23.10
  -3   1   7  132.49   28.70
  -3  -1   7  117.59   30.90
  -3   1  -7  207.58   48.30
   3  -1  -7  145.69   24.40
  -4   1   7  112.59   28.90
  -4   1   7   57.99   28.00
  -4  -1  -7  228.58   98.59
  -4  -1   7   99.99   28.60
  -4   1  -7  130.89  123.09
   5   1  -7   90.29   18.10
   5  -1   7   88.39   23.20
   5   1  -7   69.99   13.40
   5  -1  -7   99.09   21.10
   5  -1  -7   61.99   22.50
   5   1   7  125.59   26.30
   5   1   7   67.49   14.00
   5   1   7   51.49   14.20
   6   1  -7   75.09   17.60
   6  -1   7   79.19   17.60
   6  -1   7  121.39   29.10
   6   1  -7  129.89   29.80
   6   1   7  109.79   18.30
   6   1   7   52.79   32.80
   6  -1  -7  128.09   28.60
   6  -1  -7   76.19   29.00
   7  -1   7  149.29   28.60
   7  -1   7  125.09   24.70
   7   1  -7  165.68   27.30
   7   1  -7  101.19   23.80
   7   1   7  121.89   27.50
   7  -1  -7  141.79   32.40
   7   1   7  163.28   24.60
   7   1   7  129.59   23.90
   7  -1  -7  154.78   26.30
   8   1  -7   32.60    9.40
   8  -1   7   16.90   11.90
   8   1  -7   38.50   11.10
   8  -1   7   54.69   11.70
   8   1   7   33.70    9.30
   8   1   7   18.60   13.20
   8  -1  -7   47.20   12.20
   8   1   7   34.70   10.50
   8  -1  -7   49.50   16.00
   9  -1   7    6.80    8.10
   9   1  -7   39.80   12.20
   9  -1   7    2.80    7.90
   9  -1   7   29.50    8.70
   9   1  -7   20.60    8.10
   9   1   7    6.20    8.10
   9  -1  -7   10.80   12.90
   9   1   7   21.00    6.70
   9  -1  -7    9.30    7.70
  10   1  -7    6.50    9.80
  10  -1   7   10.30    5.90
  10  -1   7   25.90   11.30
  10  -1  -7    4.00    6.60
  10  -1  -7   -8.00    5.40
  10   1   7   -9.40   10.20
  10   1   7   -4.40    8.80
   0   2   7    8.50    5.80
   0  -2  -7   12.70   15.10
   0   2   7   -0.60    7.30
   0   2  -7    8.20   27.00
   0  -2   7   -0.40   11.90
   0   2  -7    9.10    9.30
   0  -2   7    9.60   11.20
   1   2  -7   13.60   14.50
   1   2  -7   22.60    8.70
  -1   2   7   40.50   10.70
   1  -2   7   38.70   10.10
   1   2  -7    5.10   29.00
   1  -2  -7   12.20   13.50
  -1   2  -7   54.29   36.60
  -1   2  -7   54.79   15.90
  -1  -2   7   18.10   12.70
  -1  -2   7   66.29  178.48
   2  -2   7  307.67   46.30
   2  -2   7  435.96  119.99
   2   2  -7  299.37   56.69
  -2   2  -7  370.66   90.59
   2  -2  -7  490.65  257.87
   2  -2  -7  148.29   94.69
  -3   2   7  664.33  114.09
  -3  -2  -7  778.62  138.39
  -3  -2   7  869.51  115.39
  -3   2  -7  640.64  167.48
   4   2  -7  103.99   18.40
   4  -2   7  128.59   33.10
   4  -2  -7  124.69   28.40
   4   2   7  112.29   21.60
   4   2   7  133.99   28.80
  -5   2   7   65.79   54.19
   5   2  -7   32.50   14.60
   5  -2   7   29.40   19.20
   5   2  -7   31.00    8.30
   5  -2   7   31.90   20.00
   5   2   7   37.20    8.80
   5   2   7   27.60   10.40
   5   2   7   63.29   23.60
   5  -2  -7   25.90   20.40
   5  -2  -7   39.90   17.20
   6   2  -7  445.36   79.59
  -6   2   7  542.95  110.89
   6  -2  -7  597.04   81.89
   6   2   7  486.95   77.69
   6   2   7  501.65   82.19
   6  -2  -7  592.44   79.89
   7   2  -7    9.00    7.30
   7   2  -7   19.40   15.90
  -7   2   7    4.00   51.39
   7  -2   7    8.10   10.10
   7  -2   7    0.60   12.40
   7  -2   7   13.50   14.10
   7   2  -7   16.70   10.50
   7  -2  -7   -1.20   11.60
   7   2   7   17.70   17.70
   7  -2  -7   -3.30   14.70
   7   2   7   -3.30    7.40
   7   2   7    6.00    7.00
   8  -2   7  110.99   22.80
   8  -2   7  139.69   24.20
   8   2  -7  103.69   21.20
  -8   2   7   63.19   42.80
   8  -2  -7  122.59   24.30
   8  -2  -7  135.49   27.40
   8   2   7  119.89   20.30
   9   2  -7   -0.80    8.50
   9  -2   7   -1.80    7.80
   9   2  -7   -2.30    9.60
   9  -2   7    4.40    7.40
  -9   2   7  -19.70   23.10
   9   2  -7   10.80    5.50
   9   2   7   12.90    5.20
   9  -2  -7    1.30    9.00
   9  -2  -7   -3.80    7.40
   9   2   7    4.10    8.30
   9   2   7   -4.80    6.20
  10   2  -7   -1.70    5.60
  10   2  -7   -4.00    8.60
  10  -2   7   10.40    8.00
  10  -2   7   -1.60    8.00
  10  -2  -7   -9.20    5.60
  10   2   7   13.00    6.20
  10  -2  -7    1.10    9.60
  10   2   7   10.00    6.10
   0  -3  -7   49.90   23.50
   0  -3  -7  256.67  177.68
   0   3  -7   35.20   40.60
   0   3   7  118.89   19.10
   0   3  -7   90.99   18.20
   1   3  -7  128.39   23.50
  -1   3   7  126.69   27.80
  -1  -3  -7  224.38   37.40
   1   3  -7  167.28   32.90
   1   3  -7   98.09   45.00
   1  -3  -7  280.67  239.68
  -1   3  -7  183.48   49.80
  -1   3  -7  137.49   28.30
   1  -3  -7  147.59   30.20
   2  -3   7  121.69  193.48
  -2   3   7   51.39   17.60
   2  -3   7   93.89   16.40
   2   3  -7   58.99   12.60
   2  -3  -7   74.69   19.80
  -2   3  -7  127.99   66.99
  -2  -3   7   25.30   19.50
  -2   3  -7   77.89   23.30
  -3   3   7   13.60   19.30
   3  -3   7   19.30    8.50
   3   3  -7   20.80    6.00
  -3   3   7   61.19   21.60
  -3   3   7   37.10   22.40
  -3   3  -7   43.50   92.29
  -3  -3   7   51.79   31.40
   3  -3  -7   27.50   13.10
   3  -3  -7   42.00  447.96
  -3   3  -7   65.39   37.70
  -3  -3   7   -4.20   27.60
  -4   3   7  345.27   83.59
   4  -3   7  359.76   65.59
   4   3  -7  414.76   60.39
   4   3  -7  447.26   67.29
   4   3   7  434.86   61.59
   4   3   7  336.57   66.99
   4   3   7  461.75   62.89
   4   3   7  415.86   60.69
   5   3  -7  215.78   35.60
   5   3  -7  164.08   36.60
   5  -3   7  229.68   39.20
   5  -3   7  178.38   39.70
  -5   3   7  180.38   56.79
   5   3  -7  206.08   30.60
   5   3   7  183.18   38.90
   5  -3  -7  262.27   44.60
   5  -3  -7  206.88   40.00
   5   3   7  190.08   30.60
   5   3   7  182.18   31.90
   5   3   7  195.58   35.80
   6   3  -7  116.99   23.10
   6  -3   7   95.79   23.20
  -6   3   7  117.89   49.30
   6  -3   7   83.29   19.70
   6  -3   7   93.29   17.60
   6   3   7   74.09   16.80
   6  -3  -7   71.19   19.80
   6   3   7   65.49   24.40
   6  -3  -7   78.79   21.70
   6   3   7   86.39   15.80
  -7   3   7   38.40   43.80
   7  -3   7   48.90   13.90
   7   3  -7   51.69   13.90
   7  -3   7   50.59   13.70
   7   3  -7   31.30    9.50
   7  -3   7   46.90   17.20
   7   3   7   31.10    9.80
   7  -3  -7   47.00   18.70
   7   3   7   54.19    9.40
   7  -3  -7   93.59   25.60
   7   3   7   20.10   17.40
   7  -3  -7   27.40   13.50
   8  -3   7   16.40   10.90
   8   3  -7   41.00   13.10
   8  -3   7    7.70   12.90
  -8   3   7   44.20   37.30
   8   3   7   22.50   14.80
   8  -3  -7   33.30   18.50
   8   3   7   19.80    7.50
   8   3   7   52.59   12.90
   8  -3  -7    4.80   11.40
   9   3  -7   25.60    6.40
   9   3  -7   23.40    8.50
   9  -3   7   25.10    9.30
  -9   3   7   29.30   22.20
   9   3  -7   36.50    9.70
   9   3   7   37.50    6.60
   9   3   7   27.80    6.20
   9   3   7   14.50    8.70
   9  -3  -7   28.40   11.10
  10  -3   7   -7.00    6.30
  10   3  -7    6.50    6.40
  10  -3   7   -0.90    7.90
  10  -3  -7   -4.00    5.40
  10  -3  -7   -0.70    6.80
  10   3   7   -1.30    4.40
   0   4  -7   91.39   57.49
   0  -4  -7  117.69   31.60
   0   4  -7  138.39   23.70
  -1  -4  -7  123.49   39.00
   1   4  -7  157.18   63.29
   1  -4   7  210.88   30.20
   1   4  -7  168.38   26.90
  -1   4   7  111.89   29.00
   1  -4  -7  232.48  353.96
  -1   4  -7  146.79   74.69
   1  -4  -7  156.98   35.40
  -1   4  -7  180.68   31.20
   2  -4   7 -291.87  368.16
   2   4  -7  160.58   26.80
   2  -4   7  190.68   30.10
  -2  -4  -7  212.08   59.69
   2  -4  -7  426.86  438.56
  -2   4  -7  156.58   89.59
   2  -4  -7  147.49   32.60
  -2   4  -7  187.98   39.80
   3   4  -7  155.98   30.20
   3   4  -7  177.78   26.60
   3   4  -7  164.08   29.50
   3  -4   7  202.48   35.60
  -3   4  -7  206.28   46.10
   3  -4  -7  167.78   38.80
   3   4   7  175.48   38.40
   3  -4  -7 1272.77  703.33
   4  -4   7   13.30   24.40
   4   4  -7  -12.20   12.20
   4   4  -7   -1.70   15.40
  -4   4   7   10.10   32.20
   4   4  -7    9.80    5.40
  -4   4   7   22.00   38.50
   4  -4   7    8.20   12.40
   4   4   7   -0.60    9.40
   4   4   7  -29.60   22.60
   4  -4  -7  -14.40   29.90
   4   4   7    0.20    9.30
   4   4   7    0.50    5.90
  -4  -4   7    8.20   49.70
   4  -4  -7    0.70   21.20
   4  -4  -7   -8.70   18.30
  -5   4   7  243.58   57.19
   5   4  -7  165.68   31.90
   5  -4   7  129.39   37.20
   5   4   7  167.98   30.00
   5  -4  -7  204.68   46.20
  -5  -4   7  232.48   56.09
   6   4  -7   75.69   18.60
   6  -4   7   46.60   19.00
  -6   4   7   88.19   45.50
   6  -4   7   43.40   17.30
   6   4  -7   76.49   14.00
   6   4  -7   81.79   17.70
   6   4   7   39.30   20.30
   6  -4  -7   44.00   22.60
   6   4   7   67.69   13.10
   6   4   7   79.89   13.80
   6   4   7   92.39   19.40
   7  -4   7    4.70   13.70
   7  -4   7    9.10   13.40
   7   4  -7   17.60    7.10
   7   4  -7   17.20   10.80
   7   4  -7   18.90   13.90
   7  -4   7    9.10   11.20
  -7   4   7   39.20   44.40
   7  -4  -7    7.30   18.00
   7  -4  -7   -3.90   10.90
   7   4   7  -10.20   13.80
   7   4   7    5.60    4.90
   7  -4  -7   18.30   17.10
   7   4   7    8.70    7.10
  -8   4   7   58.89   31.80
   8  -4   7   29.80   11.10
   8   4  -7   27.80   12.30
   8   4  -7   11.10    6.10
   8   4  -7   33.30    9.40
   8  -4   7    3.70   11.30
   8  -4  -7   12.10   15.70
   8  -4  -7   32.40   14.20
   8   4   7   16.50    5.00
   8   4   7   19.50    5.50
   8  -4  -7    2.70    8.70
   8   4   7   29.50   10.40
   9   4  -7   15.80    8.30
   9  -4   7   13.80    7.90
   9   4  -7   10.80    4.70
   9  -4   7   -0.70    6.70
   9   4   7    4.60    3.60
   9   4   7    9.80    4.20
   9  -4  -7   25.50   11.20
   9   4   7   11.50    7.90
   0  -5   7   15.60   23.70
   0   5   7    4.00    6.90
   0   5   7   22.10    8.90
   0   5   7   11.40    9.00
   0   5  -7   57.59   87.19
   0   5   7   22.00   29.90
   0  -5   7   15.70   20.50
   0  -5  -7   28.20   36.30
   0   5  -7   -6.80   10.60
   1  -5   7   78.39   32.80
   1   5  -7   36.30   89.19
   1  -5   7   61.99   23.50
  -1   5   7   73.09   16.30
  -1  -5  -7   -3.40   51.59
  -1  -5   7  106.49   27.10
  -1   5  -7  109.79   24.90
   1   5   7  103.09   15.90
  -1   5  -7   70.99   22.00
   1   5   7  111.99   36.10
  -1  -5   7   76.09   30.80
   1   5   7   95.59   18.30
   2   5  -7   60.99   30.80
   2   5  -7   61.69   12.50
   2   5  -7   30.40    8.50
   2  -5   7   19.00   19.30
  -2  -5  -7   18.20   53.69
   2  -5   7   22.70   14.60
  -2   5   7   20.00   13.10
   2   5  -7   35.90   11.60
  -2   5   7   84.59   30.60
  -2  -5   7   45.20   31.80
   2  -5  -7   14.20   19.80
  -2  -5   7   72.89   30.40
  -2   5  -7   10.10   24.10
   2  -5  -7   35.10   32.80
   2   5   7   31.80   10.00
   2   5   7   27.30    8.60
   2  -5  -7   -1.20   25.90
   2   5   7   20.30   31.00
  -3   5   7  140.99   31.70
  -3   5   7  249.97   43.20
   3   5  -7  152.58   23.50
   3   5  -7  165.78   26.70
   3   5   7  157.78   25.60
   3   5   7  154.58   25.20
   3  -5  -7  116.49   30.90
   3   5   7  139.79   23.20
   3   5   7  127.79   36.10
   3  -5  -7   91.69   31.40
  -3  -5   7  135.59   44.80
  -3   5  -7   90.99   46.40
   4  -5   7   15.80   17.80
  -4   5   7   49.80   34.20
   4   5  -7   66.29   13.10
  -4   5   7  119.39   36.60
   4   5  -7   56.19   13.90
   4  -5   7  133.39   30.90
   4   5   7   75.29   14.20
   4  -5  -7   38.90   27.90
   4   5   7   36.00   25.50
  -4  -5   7   94.69   44.00
   4   5   7   45.60   10.20
   4  -5  -7   19.10   19.20
  -5   5   7   88.59   34.10
   5   5  -7   71.99   13.40
   5   5  -7   40.00   14.60
   5  -5   7   56.39   21.40
   5   5   7   65.09   13.20
   5   5   7   73.99   14.40
   5  -5  -7  117.29   33.10
   5   5   7   65.79   12.70
   5   5   7   14.50   21.80
  -5  -5   7   46.20   39.00
   6   5  -7  158.58   28.70
   6   5  -7  118.19   24.80
   6  -5   7  140.69   29.80
   6   5  -7  137.89   21.60
   6   5   7  127.09   21.70
   6   5   7  113.89   26.60
   6   5   7   71.89   26.30
   6   5   7  123.29   20.00
   6  -5  -7  195.88   44.90
  -6  -5   7  111.59   39.50
  -7   5   7   48.40   18.60
  -7   5   7   61.09   38.90
   7   5  -7   51.49   13.30
   7  -5   7   36.10   16.30
   7  -5   7    8.40   13.00
   7   5  -7   26.90    6.60
   7   5   7   20.70    6.40
  -7  -5   7    5.90   23.70
   7   5   7    6.40   16.20
   7  -5  -7   -3.70   10.60
   7   5   7   14.50    5.20
   7  -5  -7   85.69   23.20
   8   5  -7   31.70    7.00
   8  -5   7   38.40   12.00
   8   5  -7   36.70   10.70
   8   5   7   40.30    8.00
  -8  -5   7   20.70   17.00
   8  -5  -7   33.70   12.40
   8   5   7   29.20    6.10
   8  -5  -7   29.90   16.90
   9   5  -7    9.80    4.90
   9  -5   7    8.70    6.00
   9  -5   7    2.10    6.80
   9   5  -7    2.80    6.30
   9   5   7    3.60    3.00
   9  -5  -7    6.20   10.90
   9   5   7    7.10    3.00
   9  -5  -7   -3.90    6.70
   0   6   7   57.79   12.90
   0  -6   7   32.80   26.00
   0   6   7   89.29   15.60
   0  -6   7   76.89   26.90
   0  -6  -7   58.89   49.60
   0   6   7   94.79   18.40
   0  -6  -7  138.19   35.40
   1   6  -7   22.80   10.20
   1   6  -7   11.30   10.70
  -1   6   7   37.40    8.10
   1   6  -7   46.10   12.20
  -1   6   7   27.70   11.50
  -1   6   7   41.40   11.50
   1  -6   7   26.10   27.30
   1  -6   7   14.70   19.40
  -1  -6   7   18.20   31.40
   1  -6  -7   37.10   36.30
   1   6   7   35.80    9.80
   1   6   7   66.19   12.20
   1   6   7   43.50   34.80
  -1  -6   7   53.19   24.80
  -1   6  -7    3.20   16.50
   1  -6  -7   42.60   27.30
   1   6   7   35.00    8.40
   1   6   7   45.40   11.30
   2   6  -7   14.50   10.90
   2   6  -7   34.40   12.00
  -2   6   7   36.10   13.80
   2  -6   7   16.90   19.30
   2   6  -7   40.30   11.10
  -2   6   7   25.20    7.40
  -2   6   7   30.90   15.30
   2   6  -7   28.50    9.20
   2   6  -7   18.80   22.40
  -2   6  -7    5.30   22.70
   2   6   7   37.10    8.80
  -2  -6   7   36.20   32.00
  -2  -6   7   44.60   42.10
   2  -6  -7   90.39   34.90
   2   6   7   31.20    8.00
   2   6   7   31.80    9.20
   2  -6  -7  -13.70   25.00
   2   6   7   53.89   33.40
  -3   6   7   32.60   11.50
  -3   6   7   59.69   24.90
   3   6  -7   74.89   25.60
   3  -6   7   29.30   22.30
   3   6   7   50.99    9.70
   3  -6  -7   29.90   24.00
  -3   6  -7   13.90   37.00
  -3  -6   7   57.89   59.89
   4   6  -7   78.19   18.50
   4   6  -7  121.49   27.70
   4   6  -7  109.99   17.40
  -4   6   7   62.29   40.60
   4  -6   7   81.39   31.10
  -4   6  -7   20.70   52.99
   4   6   7   57.09   27.90
   4   6   7   87.39   18.70
   4   6   7  102.19   16.50
   4   6   7  115.09   20.40
   4  -6  -7   15.90   44.00
  -4  -6   7  133.79   38.60
   4   6   7   85.89   18.20
   5  -6   7  202.88   31.70
  -5   6   7  152.28   58.39
  -5   6   7  109.59   21.90
   5   6  -7  119.49   25.30
   5   6  -7  147.49   22.10
   5   6   7  121.39   20.80
   5   6   7  152.78   22.70
   5   6   7  129.49   23.50
  -5  -6   7  139.19   38.60
   5   6   7   73.09   28.40
   6   6  -7   60.19   10.10
  -6   6   7  113.29   35.10
   6  -6   7   51.99   19.50
  -6   6   7   18.30   12.80
   6   6  -7   57.29   12.50
   6   6   7   56.89   13.20
   6   6   7   50.09   10.40
  -6  -6   7   46.90   28.20
   6   6   7   16.50   16.80
   6   6   7   42.70    9.80
   7   6  -7    8.00    4.80
   7  -6   7   -3.30   11.80
   7  -6   7   18.30   10.90
  -7   6   7    6.60   10.50
   7   6  -7   25.40   12.80
   7  -6  -7   11.00    9.30
   7   6   7   15.80    4.20
  -7  -6   7    8.30   15.20
   7   6   7   10.80    9.90
   7   6   7   11.30    4.90
   8   6  -7    2.20    8.10
   8   6  -7   -0.50    2.80
   8  -6   7    0.50    6.80
   8  -6   7    6.40    9.20
   8  -6  -7   18.20   10.00
   8   6   7   13.10    9.50
   8   6   7    0.00    2.10
   8   6   7    0.70    3.50
   0   7   7    1.60    5.50
   0  -7   7   -3.80   32.60
   0  -7  -7    5.30   28.20
   0  -7   7  -13.50   25.30
   0   7   7   26.10   11.30
   0  -7  -7   41.90   49.20
   0   7   7    9.40    9.30
   0   7  -7    6.70   12.70
  -1  -7  -7   35.10   29.90
   1  -7   7   22.40   25.10
  -1   7   7   19.70   11.40
   1   7  -7   -2.60   11.50
  -1  -7  -7    9.50   63.29
  -1   7   7   12.70    5.80
   1  -7   7   33.70   33.10
  -1   7   7    4.40   13.60
   1   7   7   11.10    5.90
   1  -7  -7   31.10   27.90
   1   7   7   33.10   13.40
  -1  -7   7   17.00   33.70
  -1  -7   7   21.50   24.80
   1   7   7   28.50    8.70
  -1   7  -7   -5.10   15.60
   1  -7  -7    5.00   38.40
  -2   7   7   19.80   15.70
   2   7  -7   13.40    7.60
   2   7  -7   13.10    9.00
   2   7  -7  -16.60   19.00
   2   7  -7   12.30   19.10
  -2  -7  -7  -70.19   71.89
  -2  -7  -7   16.10   31.10
  -2   7   7   15.40   11.80
  -2   7   7    0.90    5.70
   2  -7   7    9.70   22.80
  -2  -7   7    7.10   28.10
  -2  -7   7  -12.90   42.00
   2   7   7   15.40    7.30
   2  -7  -7   11.80   35.50
   2  -7  -7   20.80   28.60
  -2   7  -7   33.50   22.10
   2   7   7   15.90    5.80
   2   7   7   -2.00   30.50
   2   7   7    8.50    7.50
   3   7  -7   -1.10   16.20
   3   7  -7  -10.00   10.30
   3  -7   7  -10.90   16.30
   3   7  -7    3.70    7.60
  -3   7   7  -18.10   25.40
  -3  -7  -7  -33.10   28.00
  -3   7   7   -7.30    5.60
   3   7  -7    2.50    8.00
  -3   7  -7  -13.50   27.40
   3   7   7    0.00    6.00
  -3  -7   7   15.50   59.59
  -3  -7   7  -15.10   25.30
   3  -7  -7    4.10   25.40
   3   7   7   -9.00    5.30
   3   7   7    0.80    7.20
   3   7   7   -4.20   12.40
   3   7   7   -0.40   26.90
   4   7  -7   39.20    8.80
  -4  -7  -7   44.00   32.80
  -4   7   7   26.10    8.60
  -4   7   7   31.40   49.20
   4   7  -7   55.49   17.20
   4  -7   7    2.20   16.30
   4   7  -7   26.30   11.40
  -4  -7   7   46.10   28.00
   4   7   7   13.70   21.80
   4   7   7   28.20    8.50
   4   7   7   29.20    7.40
   4   7   7   31.10   11.30
  -4   7  -7    5.40   42.40
   4   7   7   27.90    7.30
  -5   7   7   21.40   42.50
  -5  -7  -7   11.50   26.60
   5  -7   7   19.20   15.90
   5   7  -7   10.10    9.40
   5   7  -7   54.69   16.20
  -5   7   7   48.40   10.20
   5  -7   7   56.39   29.10
   5   7   7   27.60    8.40
  -5  -7   7   28.00   22.60
   5   7   7   17.50    5.90
   5   7   7   41.80   11.50
   5   7   7   21.60   17.70
   5   7   7   26.10    8.60
   6   7  -7   44.30    9.70
   6   7  -7   67.49   12.30
  -6   7   7   63.49   11.90
  -6  -7  -7   42.30   20.60
   6  -7   7   44.50   20.60
   6   7   7   23.40    8.40
  -6  -7   7   22.40   19.00
   6   7   7   41.40    8.30
   7  -7   7   28.20   11.70
  -7  -7  -7  -16.20   16.60
   7  -7   7   -3.00    9.60
   7   7  -7    5.90    9.40
  -7   7   7    2.90    8.80
   7   7  -7    3.50    3.30
   7  -7  -7   11.50    9.30
   7   7   7    9.20    4.60
   7   7   7   13.50    3.10
  -7  -7   7   15.60   10.90
   8   7  -7    2.30    2.80
   8   7  -7    0.30    8.50
   8  -7   7    2.50    7.80
   8  -7   7    0.40    6.90
   8   7   7    5.30    3.60
   8  -7  -7   -8.10    7.60
  -8  -7   7    0.40   10.00
   8   7   7    1.30    2.10
   0  -8  -7   11.90   26.60
   0  -8   7    3.80   21.80
   0  -8  -7   -9.80   41.90
   0  -8   7   29.00   35.00
   0   8  -7    0.70   14.70
   0   8   7   -0.30   13.40
   0   8   7    2.40    5.10
   0   8   7    5.60    8.50
   1  -8   7   -5.30   30.50
   1   8  -7   76.99   13.90
   1   8  -7   91.99   22.80
  -1   8   7   25.70   12.60
   1   8  -7   52.79   21.70
  -1  -8  -7   92.29   30.40
  -1   8   7   51.69   10.80
  -1  -8  -7  -26.50   55.69
  -1   8   7   73.49   17.40
  -1   8  -7   15.80   18.20
  -1  -8   7   54.19   26.80
   1  -8  -7   97.19   33.20
   1   8   7   51.19   10.60
   1   8   7   56.09   11.40
   1  -8  -7   15.00   36.90
  -1  -8   7    8.70   45.40
   2   8  -7    0.00    8.50
   2  -8   7   29.20   27.80
  -2  -8  -7  -51.59   68.89
  -2  -8  -7   11.00   25.00
  -2   8   7   -1.90   16.00
  -2   8   7    4.60    5.50
  -2   8   7    7.80   18.50
   2   8  -7   -0.50   17.20
  -2   8  -7    5.30   19.50
   2  -8  -7   12.20   26.60
   2   8   7    2.90    4.70
  -2  -8   7   10.30   47.40
   2   8   7   13.90    7.20
  -2  -8   7   19.10   26.90
  -3   8   7  109.89   63.59
  -3  -8  -7   99.09   27.60
   3   8  -7   44.20    9.60
   3   8  -7   69.29   17.80
   3   8   7   17.10   14.70
   3   8   7   38.00    9.40
   3   8   7   42.10    8.10
  -3  -8   7   13.40   22.20
   3  -8  -7   18.20   45.70
  -3  -8   7   65.59   67.69
   4  -8   7   -6.00   27.60
  -4   8   7   10.90   34.50
  -4  -8  -7   41.30   25.80
  -4   8  -7   12.70   34.00
   4   8   7    7.40   11.20
   4   8   7   19.30    6.70
   4   8   7   18.90    6.30
  -4  -8   7   -1.70   21.80
   4   8   7   20.50    5.50
  -5   8   7    9.40    8.20
  -5  -8  -7    2.60   17.60
  -5   8   7    0.40   55.59
   5  -8   7    3.70   15.30
   5   8  -7   29.70   12.80
   5   8  -7   11.40    5.70
   5   8   7    8.90    4.30
  -5  -8   7   -1.80   15.80
   5   8   7   10.40    6.20
   5   8   7    5.90    6.70
   6  -8   7    1.10   12.90
   6   8  -7   29.50   10.30
   6   8  -7    9.30    3.70
  -6  -8  -7    4.40   15.10
   6  -8   7    7.20   25.50
  -6   8   7   17.10    7.90
   6   8   7    1.10    2.80
  -6  -8   7   15.80   12.30
   6   8   7    3.70    4.60
   7   8  -7   -1.20    2.80
  -7  -8  -7   29.30   12.60
   7   8  -7   12.00    9.40
  -7  -8   7   17.60   15.70
   7  -8  -7    5.10    7.30
   7   8   7    5.10    3.90
   0  -9  -7   19.10   48.30
   0   9   7   50.99   13.00
   0  -9  -7   50.19   31.30
   0  -9   7   14.40   43.30
   0   9  -7   43.80   28.60
   0   9   7   51.49    9.80
   0  -9   7   39.80   22.30
  -1   9   7   55.19   22.30
  -1  -9  -7    0.40   62.99
  -1   9   7   63.59   21.30
   1  -9   7   18.70   38.30
  -1  -9  -7   88.79   28.10
   1   9  -7    4.30   20.50
  -1   9   7   45.20    8.50
   1  -9  -7   93.29   48.30
  -1  -9   7   49.70   20.30
   1  -9  -7    2.70   30.60
   1   9   7   26.40    9.70
  -1   9  -7   10.30   22.40
  -1  -9   7  -11.60   53.59
   1   9   7   31.90    6.80
  -2   9   7   23.40    6.70
  -2   9   7   26.20   26.60
  -2  -9  -7   30.20   77.39
  -2  -9  -7   37.80   23.00
   2   9  -7   63.39   23.70
  -2   9  -7    8.90   21.40
  -2  -9   7   23.70   21.70
  -2  -9   7    3.80   56.49
   2  -9  -7   27.40   26.40
   2   9   7   46.90    9.50
  -3   9   7  -16.20   29.60
  -3   9   7    9.50    7.50
   3   9  -7   25.20   13.00
   3   9   7    7.80    5.30
   3   9   7   -0.10    8.40
  -3   9  -7   34.20   22.00
  -3  -9   7   -5.60  101.29
  -3  -9   7    9.70   21.60
   4   9  -7    4.00   10.30
  -4  -9  -7   27.80   16.10
  -4   9   7   17.00    6.30
   4   9  -7   12.40    5.20
   4   9   7    6.70    8.30
   4   9   7   14.70    3.30
  -4  -9   7   -0.40   14.60
   4   9   7    5.50    5.10
   4   9   7   13.20    5.40
  -5  -9  -7  -15.70   13.20
   5   9  -7    4.30    4.20
   5   9  -7    7.70    9.00
  -5   9   7    3.50    6.30
   5   9   7   10.70    3.80
   5   9   7   -0.50    6.20
  -5  -9   7   -7.60   10.00
   5   9   7   11.60    4.50
   6   9  -7   14.70    7.30
  -6  -9  -7    3.80   12.20
   6   9  -7   12.50    3.80
   6  -9  -7    9.30    7.90
   6   9   7    2.70    2.70
  -6  -9   7    4.60    8.90
   6   9   7    0.10    4.80
   0  10   7   47.20    8.70
  -1 -10  -7   23.60   22.00
  -1  10   7   19.40    5.10
  -1 -10   7   37.80   15.00
   1  10   7   12.50    3.70
   1  10   7   12.60    8.20
  -2 -10  -7   33.60   19.40
   2  10  -7   18.80   12.90
  -2  10   7   14.20    4.30
  -2 -10   7   -8.10   13.20
   2  10   7   24.90    6.50
   2  10   7   12.00    3.60
  -3 -10  -7   32.10   15.40
  -3  10   7   43.70    8.10
   3  10  -7   16.20   11.60
   3  10   7   30.70    5.60
   3  10   7   34.00    7.30
  -4  10   7    8.50    5.50
  -4 -10  -7    5.80   13.30
   4  10  -7   16.70    9.30
   4  10   7   21.70    5.00
  -4 -10   7    0.80   10.00
  -5 -10  -7   -1.40   12.50
   5  10  -7   11.60   10.00
  -5 -10   7    4.30    9.30
   0  11   7   14.00    3.50
  -1  11   7    9.50    3.00
   1  11   7   10.70    2.80
  -2 -11  -7   17.30   19.00
   2  11   7    4.40    2.60
   2  11   7    3.40    5.70
  -3 -11  -7   10.00   14.20
  -3  11   7   -0.90    3.70
   0   0  -8 3676.93  535.25
   1   0  -8  197.98   30.40
  -1   0   8  154.58   30.60
  -1   0  -8  170.98   37.20
  -2   0  -8  244.38   65.79
  -2   0   8  267.77  262.37
   2   0   8  221.18   37.20
  -2   0   8  268.97   39.60
  -3   0   8   -8.30   14.10
   3   0  -8    9.60    7.60
  -3   0   8   13.60   17.40
  -3   0  -8  -27.90   77.49
   4   0   8  270.07   51.19
   4   0  -8  256.07   58.59
   5   0  -8   -7.20    7.40
   5   0   8    1.80    7.60
   5   0   8   19.60   22.90
  -5   0   8   -1.50   40.10
   5   0  -8    3.60   16.70
   5   0   8   -1.80   21.90
   6   0  -8  105.59   25.30
   6   0   8   78.99   30.40
   6   0   8  137.09   26.50
   6   0   8   71.59   15.80
   6   0  -8   89.89   19.00
   7   0   8   22.80    9.10
   7   0  -8   33.50   15.30
   7   0   8   21.70   14.10
   7   0  -8   36.40    9.10
   7   0  -8   32.30   12.00
   7   0   8   25.60   14.60
  -7   0   8   21.20   34.20
   7   0   8   44.30   11.60
   8   0   8  149.59   25.00
   8   0  -8  197.58   32.70
   8   0  -8  161.18   26.80
  -8   0   8   98.49   35.30
   8   0   8  115.79   27.50
  -9   0   8   18.10   21.70
   9   0  -8   24.30    8.80
   9   0   8   18.30    8.30
   9   0  -8   34.90   10.30
   9   0   8   38.60    7.70
  10   0  -8   13.20    8.30
  10   0   8    4.00    5.90
   0   1   8  276.87   38.70
   0   1  -8  182.98   55.69
   0  -1   8  234.28  130.09
   0  -1  -8  213.88   58.29
   0  -1   8  257.17   40.00
   1  -1   8  734.33  133.59
  -1  -1  -8  999.80  154.88
  -1   1   8 1020.60  133.79
   1   1   8 1023.20  133.49
  -1   1  -8  719.13  152.48
  -1  -1   8  522.95  235.68
  -1  -1   8  903.81  134.09
   1  -1  -8 1002.30  148.89
  -2  -1  -8  164.08   51.49
   2  -1   8  116.39   20.00
   2   1  -8   57.79   48.60
  -2   1   8   99.49   25.20
  -2  -1  -8   72.49   43.40
   2  -1  -8  129.49   39.00
  -2   1  -8  182.68   68.89
  -2   1  -8   80.59   31.00
  -3   1   8   16.50   16.60
  -3  -1  -8   -2.10   68.89
   3   1  -8    7.30    5.70
  -3   1   8   12.30   21.00
  -3   1   8    5.40   19.40
   3  -1  -8    1.90    8.60
  -3   1  -8  -13.10   64.59
  -3  -1   8    3.50   19.20
  -3  -1   8    5.40   17.00
   4  -1   8  189.48   39.70
   4   1  -8  152.68   26.00
   4   1   8  170.08   27.40
   5   1  -8   14.40   13.90
   5  -1   8   28.40   19.40
   5   1  -8   16.80    7.60
   5  -1   8    5.20   20.90
  -5   1   8  -29.10   40.70
   5   1   8   11.30    8.50
   5  -1  -8   23.30   10.00
   5  -1  -8   19.50   19.60
   5   1   8   11.40    8.00
   5   1   8   25.20   21.90
   5  -1  -8   13.40   18.00
  -5  -1   8   10.70   42.00
   6   1  -8  219.88   35.20
  -6   1   8  169.68   55.99
   6  -1   8  206.48   39.50
   6  -1   8  229.48   37.20
   6   1  -8  151.68   31.30
   6   1   8  238.78   31.50
   6  -1  -8  214.48   36.00
   6   1   8  151.68   31.40
   6   1   8  237.18   42.30
   6  -1  -8  239.78   40.20
   7  -1   8   46.30   16.50
  -7   1   8   33.70   39.70
   7  -1   8   67.19   17.40
   7  -1   8   62.99   13.00
   7   1  -8   47.10   11.70
   7   1   8   65.49   13.60
   7  -1  -8   81.99   19.60
   7   1   8   75.59   19.40
   7   1   8   92.99   16.80
   8   1  -8  161.78   29.50
   8   1  -8  139.69   23.70
   8   1  -8  118.49   23.30
   8  -1  -8   77.69   22.40
   8   1   8  117.59   21.70
   8  -1  -8  106.49   26.30
   8   1   8  101.59   19.60
  -9   1   8   29.70   20.30
   9  -1   8   21.80    7.70
   9  -1   8    3.30    8.00
   9   1  -8    3.90    6.30
   9  -1   8   26.30    7.10
   9   1   8   16.20    6.60
   9  -1  -8   10.30    8.30
   9   1   8   13.10    5.40
   9  -1  -8    6.40    6.10
  10   1  -8    0.50    8.40
  10   1  -8   13.20    6.50
  10  -1   8   -2.40    6.70
  10  -1  -8    0.10    5.70
  10  -1  -8    3.00    6.70
  10   1   8    2.70    5.40
   0  -2  -8  125.79   30.10
   0   2   8  152.68   29.30
   0   2  -8  159.68   28.10
   0   2  -8  249.08   54.79
  -1  -2  -8   23.70   25.00
  -1  -2  -8   59.69   51.19
   1  -2   8   26.90   10.70
  -1   2   8   36.30    9.70
   1   2  -8  -24.10   38.40
  -1   2  -8   14.70   47.30
   1  -2  -8    7.80   13.70
  -1  -2   8   49.99   16.50
  -1   2  -8   17.60   17.50
   1   2   8   43.20    9.90
  -1  -2   8   50.09  261.57
  -1  -2   8    0.80   15.00
   1  -2  -8  -13.40   37.10
  -2  -2  -8   77.39   61.99
  -2  -2  -8   30.10   35.40
   2  -2   8   57.99   13.40
  -2   2   8   30.80   18.70
  -2   2   8   73.19   20.10
  -2   2  -8   60.09   28.10
  -2  -2   8  103.89   21.40
  -2   2  -8   45.10   54.79
   2  -2  -8  102.59   49.40
   3   2  -8   36.10    9.50
  -3   2   8   59.19   25.20
   3   2  -8   55.29   10.90
  -3   2   8   21.00   25.00
  -3  -2  -8   61.19   63.39
  -3  -2   8   50.89   26.00
  -3   2  -8   48.20   79.29
   4  -2   8  145.99   33.60
  -4   2   8  183.28   47.10
   4   2  -8  119.39   21.90
   4   2   8  129.49   24.20
   4   2   8  142.99   31.60
   4   2   8  113.99   30.90
   4  -2  -8  150.98   28.70
  -4  -2   8  189.58   54.99
   4  -2  -8  208.68   39.40
  -5   2   8  144.09   48.40
   5  -2   8  141.39   28.30
   5   2  -8  114.89   21.40
   5  -2   8  192.08   33.10
   5   2   8  113.29   22.20
   5   2   8  119.29   21.10
   5  -2  -8  164.28   36.90
   5   2   8  118.39   30.40
  -5  -2   8   97.49   46.80
   5  -2  -8  153.68   32.80
   6  -2   8  249.88   41.40
  -6   2   8  212.78   55.39
   6   2  -8  248.38   37.80
   6  -2   8  202.08   44.00
   6   2   8  189.28   46.80
   6  -2  -8  248.98   42.40
   6   2   8  268.57   37.50
   6   2   8  228.88   37.90
   6  -2  -8  307.47   45.20
   7  -2   8   56.99   13.30
   7  -2   8   34.00   14.20
   7   2  -8   51.99   14.70
  -7   2   8   55.39   37.10
   7  -2   8   42.90   16.20
   7  -2  -8   53.39   17.00
   7  -2  -8   56.39   14.60
   7   2   8   50.79   19.40
   7   2   8   60.59   10.80
   7   2   8   68.29   12.40
   8   2  -8   45.00   10.30
   8   2  -8   50.69   17.00
   8  -2   8   75.89   14.30
  -8   2   8   47.50   29.00
   8  -2   8   54.29   15.30
   8  -2  -8   26.40   12.80
   8   2   8   63.59   12.00
   8  -2  -8   65.29   20.60
   8   2   8   49.30   11.60
  -9   2   8   -3.80   17.10
   9  -2   8   -6.90   15.80
   9   2  -8   -0.90    6.80
   9  -2   8   15.70    6.70
   9  -2   8    3.80    7.70
   9   2  -8   14.90    9.50
   9   2   8    9.20    6.00
   9   2   8    3.40    4.30
   9  -2  -8    7.80    8.00
   9  -2  -8    5.20    5.40
  10  -2   8    1.00    6.20
  10   2   8   -2.40    6.00
   0   3  -8  -71.89   48.30
   0  -3   8   23.70   15.40
   0  -3   8   15.40   20.80
   0   3   8    4.60   12.40
   0   3  -8    4.60    9.80
   0  -3  -8  -10.10   20.90
   0   3   8   19.10    8.60
  -1  -3  -8   67.79   31.00
  -1   3   8  115.19   22.00
   1   3  -8   70.09   56.09
   1  -3   8  143.19   22.70
  -1   3  -8   94.39   60.19
   1  -3  -8   57.59   21.80
  -1  -3   8   53.19   26.20
  -1   3  -8   75.29   21.60
  -2   3   8    3.70   17.70
   2   3  -8   19.30    7.40
  -2  -3  -8   27.90   45.40
  -2   3   8   50.69   15.60
   2  -3   8   15.50   11.50
  -2   3   8   29.20   19.90
  -2   3  -8   24.80   81.19
  -2   3  -8   29.20   26.70
  -2  -3   8   77.09   27.50
  -2  -3   8   -9.40   17.60
   2  -3  -8    3.80   15.00
  -3   3   8  131.79   40.00
   3   3  -8  100.49   14.90
   3  -3   8   88.69   19.80
   3  -3   8   80.59   18.50
  -3   3   8   64.69   17.60
   3   3  -8   79.49   16.30
   3   3   8   92.69   25.10
  -3   3  -8  137.09   45.90
   3   3   8   99.99   18.70
   4   3  -8  196.58   39.30
  -4   3   8  275.27   63.39
   4   3  -8  210.08   34.90
   4   3   8  246.08   36.50
  -4  -3   8  356.46   79.49
   4   3   8  225.58   43.00
   4  -3  -8  263.57   47.50
   4   3   8  247.88   38.10
  -5   3   8   47.40   41.60
   5   3  -8   34.00   23.60
   5  -3   8   66.29   23.60
   5  -3  -8   40.90   23.50
   5   3   8   47.10   15.00
  -5  -3   8   57.99   46.10
   6   3  -8   49.20    9.40
   6  -3   8   25.30   16.80
   6  -3   8   62.29   16.80
  -6   3   8   41.70   40.00
   6  -3   8   29.90   12.00
   6   3  -8   54.29   15.60
  -6  -3   8   21.70   34.90
   6   3   8   35.60    9.60
   6  -3  -8   57.39   20.80
   6   3   8   28.20   20.20
   6   3   8   37.30    8.50
   6  -3  -8   17.40   14.60
   7   3  -8   75.09   15.90
   7  -3   8   37.70   16.10
   7   3  -8   58.89   11.60
  -7   3   8   89.49   40.90
   7  -3   8   59.69   13.70
   7  -3   8   48.70   15.00
   7   3   8   44.90   10.20
   7   3   8   61.09   20.50
   7  -3  -8   69.89   19.10
   7  -3  -8   58.09   14.70
  -7  -3   8   62.29   29.60
   7   3   8   61.59   12.30
   8  -3   8   32.80   11.20
  -8   3   8   53.09   25.50
   8  -3   8   22.80    9.30
   8  -3   8   19.20   12.00
   8   3   8   10.10   11.80
  -8  -3   8   18.70   18.70
   8   3   8   26.00    6.80
   8  -3  -8   15.70   12.10
   8  -3  -8   16.60   13.60
  -9   3   8   24.80   19.20
  -9   3   8    4.20    7.00
   9   3  -8   18.50    8.70
   9   3  -8    7.60    6.90
   9   3   8    4.60    6.60
   9   3   8   23.90    6.00
   9   3   8   22.50    4.70
   9  -3  -8   13.70    9.20
   0   4  -8   40.10   76.99
   0  -4  -8   20.70   28.30
   0  -4   8   50.19   27.80
   0  -4   8  107.09   22.90
   0   4   8   64.99   33.30
   0   4   8   57.19   12.80
   1   4  -8  114.89   86.09
  -1  -4  -8   73.09   38.80
   1  -4   8   34.50   16.90
  -1   4   8   66.39   13.70
   1   4   8   69.59   27.70
  -1   4  -8   48.10   21.20
   1  -4  -8   36.50   23.50
  -1   4  -8  -53.19   88.89
  -1  -4   8   99.89   24.60
   1   4   8   82.49   14.30
  -1  -4   8   72.19   27.00
  -2  -4  -8   78.89   52.19
   2   4  -8   81.99   13.10
  -2   4   8   55.99   14.80
   2  -4   8   70.99   25.10
   2   4  -8   46.00   14.30
  -2   4   8  108.39   30.70
  -2  -4   8  149.69   32.80
   2   4   8   90.29   27.50
  -2  -4   8   74.29   30.10
   2  -4  -8   44.40   29.50
   2  -4  -8  101.19   42.40
   2   4   8   84.69   15.20
  -2   4  -8   57.19   28.30
   3   4  -8  124.09   20.40
   3   4  -8  131.59   22.30
  -3   4   8   99.09   23.10
  -3   4   8  217.58   49.40
   3   4  -8  156.28   27.10
   3   4   8   80.49   29.20
   3   4   8  146.89   22.40
  -3   4  -8   74.69   46.80
   3  -4  -8  136.09   31.00
  -3  -4   8  199.38   45.60
   4   4  -8  113.79   26.20
   4   4  -8  138.09   21.90
  -4   4   8  181.78   40.10
  -4   4   8  126.69   26.40
   4  -4  -8   73.29   31.70
   4   4   8  143.29   21.90
  -4  -4   8  206.98   49.90
   4   4   8  151.48   24.20
   4  -4  -8  164.08   31.40
   4   4   8  121.69   31.10
   5   4  -8  168.08   28.40
   5  -4   8  192.18   35.70
   5   4  -8  148.29   23.20
   5   4   8  134.79   22.60
   5   4   8  160.48   24.30
  -5  -4   8  110.79   45.70
   5   4   8   84.69   29.20
   5   4   8  170.58   26.70
   5  -4  -8  125.69   28.30
   6   4  -8   22.30   15.00
   6  -4   8    3.80   14.50
  -6   4   8   -5.20   32.90
   6   4  -8   20.00    6.90
   6   4  -8    9.90   15.00
   6  -4   8   -2.20   15.10
   6   4  -8   25.60   14.60
   6   4   8   16.90   17.70
   6   4   8    1.90    7.40
   6   4   8    6.70    4.90
   6  -4  -8   20.20   23.10
  -6  -4   8    4.70   31.40
   6   4   8    8.70   17.30
   6  -4  -8   -7.80   12.80
   7   4  -8  132.29   21.10
   7  -4   8  130.09   24.30
  -7   4   8  130.29   39.90
   7  -4  -8  136.69   35.30
   7   4   8  120.59   19.10
   7   4   8  101.29   19.80
  -7  -4   8   88.59   41.80
   7  -4  -8  146.39   36.90
   8  -4   8    1.90    8.60
   8   4  -8   22.50    8.40
   8   4  -8   12.70    4.80
   8  -4   8    4.10    8.40
  -8   4   8   12.00   22.20
  -8   4   8   13.90    7.40
   8   4  -8   36.50   11.40
   8  -4  -8    8.60   14.70
   8   4   8   18.00    5.00
  -8  -4   8   28.00   16.90
   8   4   8   19.20    4.50
   8   4   8   27.40    9.60
   9   4  -8   48.70    8.90
   9   4  -8   58.99   13.90
   9  -4  -8   60.89   13.80
   9   4   8   39.80   14.10
   9   4   8   43.20    8.80
   0  -5  -8   -5.60   44.00
   0   5  -8   18.10   16.80
   0   5   8    3.10    6.60
   0  -5   8   25.20   28.20
   0   5   8   22.90   27.50
   0  -5   8    7.00   19.10
   0   5   8    8.60    8.50
   1   5  -8  161.48   24.00
   1   5  -8   96.59   26.00
  -1   5   8  137.79   24.70
  -1  -5  -8  126.79   53.79
   1  -5   8  151.28   34.60
   1  -5   8  141.69   31.70
   1   5   8  142.59   23.60
   1   5   8  140.09   36.50
  -1  -5   8  171.68   32.10
   1  -5  -8   56.79   40.00
   1   5   8  146.19   22.60
  -1  -5   8  259.67   67.39
   2   5  -8  184.58   27.20
   2  -5   8  125.09   32.00
  -2   5   8  136.19   29.50
  -2  -5  -8   88.39   66.79
  -2  -5   8  335.77   72.89
   2   5   8  179.88   39.30
   2   5   8  190.28   27.60
  -2  -5   8  220.38   46.50
   2   5   8  204.98   27.70
  -2   5  -8  167.38   43.40
   2  -5  -8  123.69   33.80
   3  -5   8   34.40   18.90
   3  -5   8   11.50   13.80
   3   5  -8   71.79   22.90
   3   5  -8   47.60    8.40
  -3   5   8   33.20   14.00
   3   5  -8   23.70   11.10
  -3   5   8   33.70   22.60
   3  -5  -8   26.50   30.50
  -3  -5   8    5.70   44.90
   3   5   8   44.70   13.30
   3   5   8   25.80    9.30
   3   5   8   31.00    7.60
   3  -5  -8    9.50   23.60
   3   5   8   15.70   21.70
  -3  -5   8   32.50   33.70
  -3   5  -8   20.30   43.60
   4   5  -8  176.68   34.10
  -4   5   8  328.97   61.89
   4   5  -8  235.78   31.70
  -4  -5   8  244.28   49.80
   4  -5  -8  182.58   45.20
   4   5   8  177.08   38.90
   4   5   8  195.58   31.10
   4  -5  -8  154.78   37.00
   4   5   8  196.88   31.90
   4   5   8  242.38   33.20
   5   5  -8  103.69   17.40
  -5   5   8   70.79   49.99
   5   5  -8   79.09   18.70
   5  -5   8  123.49   27.20
   5   5   8   99.59   20.40
   5   5   8  106.89   17.40
  -5  -5   8   79.89   36.50
   5   5   8   99.79   18.60
   5   5   8   59.19   24.10
   6   5  -8   16.10   12.00
   6   5  -8   11.90   11.70
   6  -5   8   -3.10   14.20
   6  -5   8   -3.20   15.70
   6   5  -8    3.30    6.10
   6   5  -8   13.30   14.80
  -6   5   8   10.70   34.00
   6   5   8   20.50   12.60
  -6  -5   8    4.30   26.20
   6   5   8    6.90    4.40
   6  -5  -8   15.00   23.60
   6  -5  -8  -10.10   11.50
   6   5   8    7.20   16.90
   6   5   8    3.40    6.50
   7  -5   8   31.20   10.80
   7  -5   8   14.10   18.70
   7  -5   8    8.70   13.10
  -7   5   8   34.50   35.80
   7   5  -8   30.50   21.20
  -7   5   8   11.50   10.60
   7   5  -8   16.50    8.10
   7  -5  -8    3.80   19.00
   7   5   8   21.70   13.90
  -7  -5   8   35.70   20.40
   7  -5  -8    7.70   12.20
  -8   5   8   -2.50    6.40
   8   5  -8    7.70    4.10
   8  -5   8    3.30    7.10
   8  -5   8    2.60   10.60
   8   5  -8    0.90    7.90
   8   5   8    2.10    2.80
  -8  -5   8    6.80   12.40
   8   5   8    7.80    3.90
   8  -5  -8   13.00   15.20
   8  -5  -8   -6.20    5.60
   8   5   8    4.20    8.10
   9  -5   8   -0.30    5.10
   9   5  -8    8.80    3.60
   9  -5   8    0.50    7.20
   9   5  -8    6.20    6.90
   9   5   8    4.60    2.60
   9   5   8    2.00    3.30
   0  -6  -8   13.90   44.50
   0   6  -8   14.60   11.00
   0   6   8   27.60    7.30
   0  -6   8   43.10   31.20
   0   6   8   27.30    9.30
   0  -6  -8   68.59   31.20
   0  -6   8   15.30   21.90
   0   6   8   31.40   10.80
   1   6  -8   12.00   11.30
  -1   6   8   17.90   11.30
  -1   6   8    3.10    9.50
  -1   6   8    4.70    5.80
  -1  -6  -8  -58.19   60.59
   1  -6   8    2.50   28.70
   1   6  -8    1.70    8.10
   1  -6   8    8.40   22.30
   1   6   8    9.90    7.70
  -1   6  -8   -2.90   15.70
  -1  -6   8  -22.00   32.10
   1   6   8   31.60   27.10
  -1  -6   8  -16.40   20.50
   1  -6  -8    1.80   37.10
   1   6   8    8.20    7.50
   1  -6  -8   34.00   27.80
   1   6   8   24.30   12.40
   1   6   8    9.30    6.10
   2  -6   8   42.50   23.00
  -2   6   8   55.59   14.80
  -2  -6  -8  -29.20   93.29
   2   6  -8   60.39   17.60
  -2   6   8   86.09   19.10
   2   6  -8   75.09   15.60
  -2  -6   8  131.29   39.80
  -2  -6   8   44.30   42.70
   2   6   8   98.89   17.00
   2  -6  -8   48.70   28.00
   2   6   8   62.29   33.80
  -2   6  -8   33.80   28.80
   2   6   8   60.59   13.40
  -3   6   8  253.87   39.10
   3   6  -8  235.48   34.80
   3   6  -8  197.58   36.90
   3   6   8  236.78   34.80
  -3  -6   8  269.97   55.89
   3   6   8  243.68   34.70
   3   6   8  145.99   42.20
  -3  -6   8  191.08   62.39
   3   6   8  215.88   34.00
   4   6  -8  127.09   29.50
   4   6  -8  181.08   27.10
  -4   6   8  254.67   48.10
   4   6   8  202.88   28.90
  -4  -6   8  162.08   44.50
   4   6   8  155.58   25.90
  -4   6  -8   84.69   60.49
   4   6   8  168.18   27.20
   4  -6  -8  175.98   93.49
   5   6  -8    4.70   10.60
   5   6  -8   22.50    6.90
   5  -6   8    0.00   12.70
   5  -6   8   -6.30   20.90
  -5   6   8  -85.29   75.29
  -5   6   8    6.20    7.90
   5   6  -8   29.80   17.20
  -5   6   8   54.69   27.30
   5   6   8    9.20    4.80
   5   6   8    3.90    6.80
  -5  -6   8   19.70   24.60
   5   6   8   -0.30    7.30
   5  -6  -8  -15.90   13.60
   5   6   8   33.10   21.20
   6  -6   8   -6.30   30.20
  -6   6   8    3.10   11.80
   6  -6   8   20.00   12.00
   6   6  -8   29.10   18.70
   6   6  -8    9.20    5.70
   6  -6   8  -11.30   12.50
   6   6   8    2.60    4.00
   6   6   8   11.60    6.90
  -6  -6   8   -5.80   34.20
   6   6   8    6.60   15.20
   6  -6  -8    6.80   13.00
   6   6   8   -8.80   18.20
  -7   6   8   -5.50    8.70
   7  -6   8    5.30   11.30
   7   6  -8    2.60    3.40
   7   6  -8   24.10   12.60
   7  -6   8    1.00    9.10
   7   6   8    3.50    4.00
  -7  -6   8   12.30   14.00
   7   6   8   -2.20    2.70
   7  -6  -8   10.90   10.20
   7   6   8   20.10    9.10
   7  -6  -8   -1.70    7.30
   8   6  -8    0.30    8.80
   8  -6   8   -3.00    6.00
   8  -6   8   -0.60   13.80
   8   6  -8    5.60    2.90
   8  -6  -8   24.60   11.80
   8   6   8    9.60    8.30
  -8  -6   8   -4.40    9.90
   8   6   8    1.60    2.00
   8   6   8    4.80    3.20
   0  -7  -8   25.00   27.70
   0  -7   8   41.60   33.20
   0  -7  -8   13.00   48.00
   0   7  -8    5.40   13.90
   0   7   8   38.80   12.60
   0   7   8   15.70    7.80
   0  -7   8   10.30   22.10
   0   7   8    9.60    5.70
   1  -7   8   14.30   26.70
   1   7  -8   28.30   15.80
  -1   7   8   33.50   10.80
  -1  -7  -8  -30.90   60.09
  -1   7   8   41.90    8.70
  -1  -7  -8   99.39   32.70
  -1   7   8   80.99   16.20
  -1   7  -8   25.90   19.00
   1   7   8   42.80    9.90
   1  -7  -8  -13.90   39.60
   1   7   8   76.49   16.00
  -1  -7   8   29.10   24.40
  -1  -7   8   48.60   43.10
   1   7   8   52.49    9.00
   2  -7   8  -10.10   24.00
  -2   7   8   29.70   16.50
  -2  -7  -8    7.90   28.30
   2   7  -8    9.60    7.20
   2   7  -8   15.50   32.70
  -2   7   8    1.70   10.30
  -2  -7  -8   14.50   74.39
  -2   7   8    7.10    5.80
   2   7  -8  -56.09   29.70
   2   7   8   10.90    6.60
   2   7   8   11.50    6.70
  -2  -7   8  -15.90   43.90
  -2   7  -8    0.80   23.80
  -2  -7   8    3.70   27.30
   2   7   8   16.60    5.70
   2  -7  -8    0.30   29.50
   3   7  -8  120.09   22.50
  -3   7   8  217.78   39.00
  -3  -7   8  146.29   36.60
  -3  -7   8  108.89   61.99
   3   7   8  101.49   33.40
   3   7   8  136.69   21.70
   3   7   8  130.39   21.60
   3   7   8  139.59   22.20
   4   7  -8  339.07   47.80
  -4   7   8  262.47   47.70
   4   7   8  315.87   47.30
  -4  -7   8  293.97   59.49
   4   7   8  312.17   47.10
   4   7   8  370.16   49.10
   4   7   8  323.87   47.90
   5   7  -8    8.40    6.60
  -5  -7  -8   -3.00   29.80
  -5   7   8   10.60    9.10
  -5   7   8   11.20   47.60
   5  -7   8   -1.60   16.80
   5   7   8    3.40   17.00
   5   7   8    0.80    4.80
  -5  -7   8   -9.60   20.60
   5   7   8    4.80    7.40
   5   7   8    6.90    8.30
  -6  -7  -8   27.60   18.90
   6  -7   8   22.00   17.90
   6  -7   8   -4.30   11.30
   6   7  -8    4.10   12.90
  -6   7   8   -1.50    8.10
   6   7  -8    1.70    3.60
   6   7   8   -1.00    5.20
   6   7   8    6.40    3.30
   6   7   8   11.00    6.30
  -6  -7   8   -1.80   15.90
   6   7   8   20.90    9.40
  -7  -7  -8   25.70   15.70
  -7   7   8   37.40    7.90
   7  -7   8   39.30   22.80
   7  -7   8   16.40    8.80
   7   7  -8   13.80    4.10
  -7  -7   8   12.90   11.40
   7   7   8   23.40    4.20
   7   7   8   23.00    5.30
   0  -8  -8   15.20   26.10
   0   8   8    8.00    4.80
   0  -8   8    6.10   22.30
   0   8   8  -20.90   16.30
   0  -8   8    0.80   37.30
   0  -8  -8  -15.70   36.00
   0   8  -8   16.20   17.60
   0   8   8    3.40    7.10
   1   8  -8  -14.90   26.00
  -1   8   8    0.20   15.90
  -1   8   8   19.40    5.30
  -1  -8  -8  -10.70   70.69
  -1   8   8   22.50   10.10
  -1  -8  -8   57.19   29.90
   1  -8   8   39.90   39.80
  -1  -8   8   15.60   50.39
   1   8   8   11.20    7.10
   1  -8  -8   93.99   32.80
  -1   8  -8   -5.70   17.40
  -1  -8   8   13.20   22.70
   1  -8  -8  -15.40   31.20
   1   8   8   16.30    5.20
   2  -8   8   12.50   29.80
  -2  -8  -8   18.30   25.60
   2   8  -8    1.00   26.20
  -2   8   8    7.70    5.30
  -2  -8  -8  -40.60   72.19
  -2   8   8   -4.70   11.80
  -2   8   8   39.20   24.40
  -2  -8   8  -18.60   22.10
  -2   8  -8  -11.10   20.60
  -2  -8   8    4.30   51.39
   2   8   8   10.10    4.60
   2  -8  -8   -4.30   26.40
   2   8   8    2.10    5.50
  -3   8   8   83.59   14.60
  -3  -8  -8   69.39   25.50
   3   8  -8   71.99   16.70
  -3   8   8   79.99   30.60
   3   8  -8  133.89   30.40
   3  -8  -8  -13.70   36.60
  -3  -8   8   96.89   27.90
   3   8   8   64.49   13.80
   3   8   8   97.19   16.10
   3   8   8   92.79   15.80
  -3  -8   8   76.99   64.19
   4   8  -8   12.30   13.90
   4   8  -8    3.60    6.70
  -4   8   8   22.70   13.00
  -4   8   8  -20.80   34.70
  -4   8  -8   10.50   55.69
  -4  -8   8   -1.90   20.90
   4   8   8   12.90    3.60
   4   8   8    4.20    8.70
   4   8   8    5.30    6.10
   4   8   8   10.00    9.40
   5   8  -8    7.90    4.60
  -5  -8  -8    7.00   15.60
  -5   8   8   31.00    7.00
  -5  -8   8    2.70   13.30
   5   8   8   14.80    4.40
   5   8   8   23.90    6.80
  -6  -8  -8   30.40   13.70
   6   8   8   28.40    5.20
   6   8   8   19.20    5.70
  -6  -8   8    9.50    9.50
   7   8  -8   -0.70    7.00
   7   8  -8    0.60    2.90
  -7  -8  -8    2.60   11.70
  -7  -8   8   -2.60    8.10
   7   8   8    5.10    2.00
   7  -8  -8   11.10    6.70
   7   8   8    3.00    3.30
   0   9   8   20.60    5.40
   0  -9  -8   14.60   46.30
   0   9  -8   -2.60   31.30
   0  -9   8   -8.80   43.10
   0  -9  -8   17.80   41.50
   0   9   8    7.30    9.60
  -2   9   8    1.70   27.90
  -2   9   8    4.10    4.70
  -2  -9  -8   17.70   27.60
  -2  -9  -8   -7.10   94.09
  -2  -9   8   45.10   55.39
  -2   9  -8  -12.70   20.90
   2  -9  -8   -8.90   25.80
  -2  -9   8  -31.70   19.10
   2   9   8   -6.70    4.50
  -3   9   8   45.10   36.60
   3   9  -8   41.90   14.60
  -3   9   8   46.60    8.70
  -3  -9  -8   27.90   16.30
  -3   9  -8    5.10   27.70
   3   9   8   42.50    8.20
   3   9   8   32.00    7.20
  -3  -9   8   22.60   16.70
   4   9  -8    7.80    5.10
  -4  -9  -8  -21.20   13.70
   4   9  -8    1.20    9.50
  -4   9   8   -6.30    4.40
   4   9   8   11.90    3.20
   4   9   8    2.10    4.40
   4   9   8    8.40    4.40
  -4  -9   8  -16.60   10.30
   5   9  -8   18.80    8.00
  -5   9   8   20.50    6.00
   5   9  -8   28.40   12.00
   5   9   8   18.10    4.80
  -5  -9   8    7.80    8.90
   5   9   8   16.10   10.20
  -6  -9  -8   53.69   13.00
   6   9   8   34.40    5.70
  -6  -9   8   17.10    9.90
   6  -9  -8   32.90    8.10
   0  10   8   68.89   10.40
   0  10   8   50.49   12.80
  -1 -10  -8   21.00   20.00
  -1  10   8   19.00    4.30
   1  10   8    4.50    6.50
   1  10   8   32.00    5.40
  -2 -10  -8   31.70   17.10
  -2  10   8   34.30    5.70
   2  10   8   25.10    5.20
  -2 -10   8   18.50   14.20
  -3  10   8    2.20    3.70
  -3 -10  -8   -1.90   13.60
   3  10   8    6.90    4.70
  -3 -10   8   12.90   12.20
   3  10   8    7.50    2.90
  -4 -10  -8  -11.50   12.00
  -4  10   8   14.20    8.70
  -4 -10   8   -7.20   10.30
   4  10   8   -0.80    4.80
   0  11   8   26.80    5.20
  -1  11   8    8.60    3.10
   1  11   8    3.10    2.70
  -2  11   8   14.10    3.50
   2  11   8   17.80    3.60
   0   0   9   12.80   15.30
   0   0   9   14.90    9.20
   0   0  -9    9.50   15.60
   0   0  -9   -7.00   48.40
   1   0   9  457.15   69.19
  -1   0  -9  399.96  108.89
  -1   0   9  489.45   69.89
   1   0  -9  432.06  106.29
  -2   0  -9   -8.30   72.09
  -2   0  -9    3.00   27.40
  -2   0   9   12.60   17.50
   2   0  -9    2.50   11.40
  -2   0   9    7.80   12.90
   2   0   9    4.70    8.60
  -3   0   9   40.00   35.80
   3   0   9   62.49   39.90
  -3   0   9   12.20   18.90
   4   0  -9  109.99   19.20
  -4   0   9  158.48   44.10
   4   0   9   68.39   26.70
   5   0   9    3.30    7.90
   5   0   9   19.00   23.70
   5   0   9   18.80   20.80
   5   0  -9   41.80   18.00
  -5   0   9   26.10   35.00
   5   0  -9   13.30    8.10
   6   0  -9   53.99   12.60
   6   0   9   61.19   12.50
   6   0   9   70.59   21.60
   6   0   9   93.39   22.60
  -6   0   9   67.99   31.70
   7   0   9   63.79   19.30
   7   0   9   81.59   15.20
   7   0  -9  109.39   20.60
  -7   0   9   21.50   26.00
   7   0   9   69.79   18.70
   7   0   9   79.69   15.00
   8   0  -9  -10.10   11.70
   8   0  -9  -13.20   17.60
   8   0   9   -2.90    9.90
   8   0   9    6.20    6.50
  -8   0   9   -2.50   17.10
  -9   0   9   -3.80   15.30
   9   0  -9    9.20    6.50
   9   0   9    9.10    7.20
   9   0  -9   20.00    8.00
   9   0   9   13.00    5.60
   0  -1  -9  217.38   62.29
   0   1  -9  110.99   63.79
  -1  -1  -9 1107.59  194.68
   1  -1   9  921.71  165.88
  -1   1   9 1289.37  166.38
  -1   1  -9  919.31  194.48
   1   1   9 1263.97  165.98
   1  -1  -9 1273.27  189.68
  -1  -1   9 1109.09  166.68
  -2  -1  -9   68.79   34.10
   2  -1   9   90.29   15.80
  -2  -1  -9   20.40   71.09
   2   1  -9   62.19   15.10
  -2   1   9   54.49   21.60
   2  -1  -9   35.90   14.60
  -2   1  -9   41.50   29.60
  -2   1  -9   80.79   81.69
  -2  -1   9   19.20   16.50
   3   1  -9   97.59   18.30
   3  -1   9   73.09   22.20
   3   1  -9  102.69   16.00
   3  -1  -9   99.69   22.10
  -4   1   9  137.59   46.10
   4   1  -9  135.29   33.50
   4  -1   9  167.48   39.10
  -4   1   9  204.78   40.00
  -4  -1   9  126.79   50.09
   4   1   9  150.98   36.40
   4  -1  -9  205.88   36.90
   5  -1   9   -6.20   21.70
   5  -1   9   -9.90   16.30
   5   1  -9   10.10    6.50
   5  -1   9   -2.90   11.00
   5   1  -9   21.50   17.50
  -5   1   9    6.90   33.80
   5   1   9   15.20   10.80
   5  -1  -9    9.60   18.30
   5   1   9   35.40   34.10
  -5  -1   9   36.20   35.30
   6   1  -9   67.39   18.10
   6   1  -9   93.19   22.40
  -6   1   9   38.30   31.50
   6  -1   9   87.49   22.50
   6  -1  -9   81.99   19.20
   6   1   9   93.79   25.60
   6  -1  -9   87.09   23.10
   6   1   9   69.59   13.90
  -6  -1   9   36.40   31.20
  -7   1   9  192.18   37.40
   7  -1   9  100.79   28.00
   7   1  -9  110.59   22.00
   7  -1   9  147.19   25.20
   7  -1   9  131.79   21.40
  -7  -1   9   82.99   31.80
   7   1   9  137.99   21.80
   7   1   9  141.79   29.40
   8  -1   9   21.70   12.10
   8  -1   9    3.60    9.70
   8   1  -9   20.50   11.80
   8  -1   9   20.80    6.70
  -8   1   9   -3.00   19.10
   8   1   9   22.50    7.20
   8  -1  -9   14.80   10.20
   8  -1  -9   34.00   14.60
  -8  -1   9    8.00   15.50
   8   1   9   18.60   15.30
   9  -1   9   16.10   10.20
   9  -1   9   21.40    7.40
   9  -1   9    4.50    6.50
   9   1  -9    3.70    6.40
  -9   1   9   -1.00   12.90
   9   1   9   11.00    4.90
  -9  -1   9   19.80   15.00
   9  -1  -9    9.10    8.00
   9   1   9    7.70    6.10
   0   2  -9  276.77   77.89
   0   2  -9  162.98   32.00
   0   2   9  155.78   34.30
  -1   2   9   84.69   22.50
  -1  -2  -9  101.89   31.80
   1   2  -9   39.30   70.89
  -1  -2  -9  159.68   71.49
  -1   2  -9  103.19   70.69
   1  -2  -9  120.09   61.39
   1  -2  -9   64.79   21.80
  -1   2  -9   63.59   23.70
  -2  -2  -9   48.20   42.70
  -2   2   9   40.80   13.90
   2  -2   9   31.00   21.80
  -2  -2  -9  142.29   88.49
  -2   2   9  106.89   32.20
   2   2  -9   48.80   10.10
   2   2  -9   49.10   11.50
  -2   2   9   53.39   26.00
  -2   2  -9   -7.90   87.29
  -2   2  -9   37.80   28.20
   2  -2  -9   37.10   17.10
  -2  -2   9   89.99   34.70
   3   2  -9   51.39   10.30
   3  -2   9   51.39   17.70
  -3   2   9   38.10   12.90
   3   2  -9   42.90   11.40
   3  -2   9  133.59   55.29
  -3  -2   9  110.19   43.90
  -3  -2   9   71.29   24.90
   3   2   9   55.69   23.30
   3   2   9   82.19   16.10
   4   2  -9  165.98   39.20
  -4   2   9  132.29   41.30
  -4   2   9  206.08   41.50
   4  -2   9  235.08   39.90
  -4  -2   9  143.59   50.39
   4   2   9   89.89   32.40
   4  -2  -9  171.98   42.50
   4   2   9  143.39   29.60
  -5   2   9   72.99   49.50
   5  -2   9   77.99   32.00
   5  -2   9  155.78   31.60
   5   2  -9   93.29   16.20
   5   2   9   65.09   16.60
   5   2   9   54.59   25.80
   5  -2  -9  100.39   37.70
   5   2   9   90.89   15.90
  -5  -2   9   81.09   59.69
   6   2  -9   20.50    7.80
  -6   2   9    3.30   29.20
  -6   2   9    5.30   12.10
   6  -2   9   34.80   16.00
   6   2  -9   54.39   15.90
   6  -2   9    8.90    9.20
   6  -2   9   20.50   15.90
   6   2   9   20.70    8.10
   6  -2  -9   20.30   15.00
   6  -2  -9   20.10   16.80
  -6  -2   9   16.90   31.00
   6   2   9   36.90    7.60
   6   2   9   30.20   22.20
   7   2  -9   48.30   14.30
   7  -2   9   46.30   11.30
   7  -2   9   44.60   14.80
   7   2  -9   77.29   17.80
  -7   2   9   29.90   28.80
   7   2  -9   45.70   10.40
   7   2   9   51.09   10.10
   7   2   9   42.50   18.20
  -7  -2   9   26.70   24.90
   7  -2  -9   20.30   15.60
   7  -2  -9   36.30   14.10
  -8   2   9    8.80   18.70
   8   2  -9   12.70    4.90
   8  -2   9    8.20    7.50
   8   2  -9    5.40   11.40
   8  -2   9    4.30    7.80
   8   2  -9    1.90   11.10
   8  -2   9   -5.30    8.50
   8  -2  -9   -8.90    7.50
   8   2   9   10.90    4.70
   8   2   9   21.40   10.30
   8   2   9    1.60    5.70
   8  -2  -9   -6.40   11.90
  -8  -2   9   -2.50   15.30
   9  -2   9   15.70    7.90
   9  -2   9   41.30   11.60
   9   2  -9   27.20    8.70
   9  -2   9   10.40    6.90
  -9   2   9   -6.30   13.70
   9  -2  -9    2.80    5.40
   9   2   9    9.20    6.00
  -9  -2   9    1.00   17.30
   0   3   9   62.49   10.80
   0  -3   9    5.90   26.50
   0   3  -9  -17.40   78.39
   0  -3  -9   30.00   26.40
   0  -3   9   63.99   17.20
   0   3  -9   28.80   14.30
  -1   3   9   60.59   28.50
  -1  -3  -9   69.19   33.30
  -1  -3  -9  123.79  103.99
   1  -3   9   39.90   13.80
  -1   3   9   34.90    9.90
   1   3  -9   49.60    8.70
   1   3  -9   20.60   11.20
   1  -3   9   18.70   14.10
   1   3   9   46.30    9.40
  -1  -3   9   73.49   22.90
  -1   3  -9   25.30   19.50
  -1   3  -9  192.58   93.39
   1  -3  -9   79.19   79.89
   1  -3  -9   22.00   18.50
   1   3   9   -3.30   22.60
   2   3  -9   24.80    5.90
  -2  -3  -9   39.10   46.20
  -2   3   9   61.49   29.00
  -2   3   9   25.50   10.30
   2  -3   9   20.80   12.70
  -2   3   9    6.40   27.30
  -2   3   9   73.69   19.80
   2   3  -9    3.50   10.50
   2  -3   9   16.80   16.20
   2   3   9   12.40   20.80
  -2  -3   9   39.70   27.40
   2   3   9   29.70    8.60
  -2  -3   9   45.60   27.50
  -2   3  -9   18.60   31.00
   2   3   9   60.19   14.90
   3   3  -9   98.49   15.60
  -3   3   9   65.59   18.10
   3   3  -9   62.09   25.10
  -3  -3   9  172.48   44.00
  -3   3  -9  147.29   55.29
   3  -3  -9   72.89   23.30
   3   3   9  101.59   17.80
   3   3   9  131.99   21.10
   3   3   9   84.99   25.70
  -3  -3   9  152.58   35.50
  -4   3   9   56.99   17.60
   4   3  -9   75.69   14.80
  -4   3   9  120.79   37.50
  -4   3   9  119.49   35.00
   4   3   9   93.19   17.40
   4   3   9  118.89   17.50
   4   3   9   55.19   24.00
   4  -3  -9   97.99   26.00
   4  -3  -9   99.99   28.30
  -4  -3   9   80.49   44.50
   5   3  -9  426.66   63.99
  -5   3   9  538.25   80.09
  -5  -3   9  408.86   88.19
   5   3   9  402.16   63.69
   5   3   9  415.26   64.49
   5  -3  -9  481.45   69.89
   6  -3   9   51.69   14.10
  -6   3   9   99.69   34.50
   6  -3   9  100.09   21.30
   6   3  -9   79.59   15.10
  -6  -3   9   71.09   35.50
   6  -3  -9   68.49   18.80
   6   3   9   61.89   22.70
   6  -3  -9  113.89   24.60
   6   3   9   67.09   14.30
   6   3   9   64.89   13.40
   7   3  -9   33.50    8.20
   7  -3   9   13.80   12.60
   7   3  -9   37.40   14.70
  -7   3   9   14.50   29.20
   7  -3   9   24.80   13.40
   7  -3   9   20.10   10.60
  -7  -3   9    6.20   27.60
   7   3   9   16.60   14.60
   7  -3  -9   34.20   17.10
   7   3   9   20.90    6.30
   7   3   9   17.10    6.40
   7  -3  -9    2.40   10.30
   8  -3   9   17.90    8.50
   8  -3   9    4.40    8.10
   8   3  -9    8.50    8.90
  -8   3   9   -0.30   19.60
   8  -3   9    6.20    9.10
   8   3  -9    6.00    9.90
   8   3   9   15.20    4.70
  -8  -3   9    0.90   12.90
   8   3   9   25.50    8.40
   8  -3  -9   18.00   12.40
  -9   3   9    2.70    4.90
   9  -3   9   -4.00    7.30
  -9   3   9   12.50   12.70
   9   3  -9   24.70    9.60
   9   3  -9   11.70    8.00
   9  -3   9   14.70    6.30
   9   3   9    8.60    3.20
   9   3   9   -4.60    5.80
   9   3   9    5.70    6.60
  -9  -3   9   -7.20   12.20
   9  -3  -9   19.20    8.20
   9  -3  -9   -1.50    5.30
   0   4   9   -3.90    6.90
   0  -4   9  -11.00   17.40
   0   4   9    7.20    6.30
   0  -4  -9   11.50   33.90
   0   4  -9  138.89  138.29
   0   4   9   43.60   14.60
   0   4   9   -7.50   23.60
  -1   4   9  160.38   25.30
   1   4  -9  159.08   24.20
   1  -4   9  218.28   44.80
   1  -4   9  172.48   36.00
   1   4  -9  109.59   28.70
  -1  -4  -9   86.59   46.80
   1   4   9  157.78   33.60
   1   4   9  171.48   24.40
  -1  -4   9  134.49   35.30
   1   4   9  141.99   25.30
   1  -4  -9   74.99   45.30
  -1   4  -9  118.49   37.40
   2  -4   9   40.60   18.50
   2   4  -9   41.80    8.00
   2   4  -9   19.30   11.00
  -2   4   9   30.90   11.00
  -2  -4  -9   36.20   57.79
   2   4   9   75.59   17.20
   2  -4  -9  118.39   37.00
   2  -4  -9   47.20   22.50
   2   4   9   51.29   22.70
   2  -4  -9   51.69   23.40
  -2   4  -9   21.20   42.10
  -3   4   9   40.30   25.50
  -3   4   9   70.89   29.80
   3   4  -9   16.10    5.70
   3  -4   9   13.50   11.60
   3   4  -9   28.70   18.40
   3  -4   9    4.60   17.30
  -3   4   9   11.70   11.50
   3   4   9    9.40   20.10
   3  -4  -9  -14.90   19.10
   3   4   9   44.60   12.60
   3   4   9   20.70    8.10
  -3  -4   9  -23.90   48.80
  -3  -4   9   16.30   34.00
  -3   4  -9   14.10   65.79
   3  -4  -9   15.80   22.80
   4  -4   9  137.39   49.60
  -4   4   9   81.09   30.00
   4   4  -9   39.30    9.10
  -4   4   9   60.49   35.60
   4  -4   9   25.90   15.10
   4   4   9   21.50   20.00
   4  -4  -9   73.19   30.90
   4   4   9   66.19   13.30
   4   4   9   47.80    9.00
   4  -4  -9  104.79   33.70
  -4  -4   9   59.79   39.40
   5  -4   9   15.30   16.40
  -5   4   9   87.49   30.60
   5   4  -9   31.40    7.90
   5  -4   9   41.40   22.30
   5   4   9  -20.70   18.90
   5  -4  -9    9.50   18.70
   5   4   9   34.20   11.60
   5  -4  -9   95.29   29.30
   5   4   9   33.40    8.90
  -5  -4   9   44.90   37.20
   5   4   9   33.80    7.50
   6  -4   9   16.60   15.80
  -6   4   9   15.00   26.70
   6   4  -9    6.00   14.70
   6  -4   9  -10.30   10.20
   6   4  -9   12.40   16.40
   6  -4   9    3.00   14.50
   6   4  -9    3.80    6.50
   6  -4  -9  -15.30   13.00
   6   4   9   23.30   18.60
   6   4   9    8.90    6.80
   6  -4  -9    3.80   22.10
  -6  -4   9  -11.20   31.00
   6   4   9   27.40   17.20
   6   4   9    5.20    4.50
   7   4  -9   -8.00   18.00
   7  -4   9   15.60    9.10
   7  -4   9    0.50   12.50
   7  -4   9   -5.40   13.90
   7   4   9    8.10    7.00
   7  -4  -9   -5.80   21.20
   7  -4  -9  -12.90   18.30
   7   4   9    5.00   23.70
  -7  -4   9    5.50   20.50
   8  -4   9    7.40    8.60
   8  -4   9   19.90   12.70
   8   4  -9   20.40    4.70
   8   4  -9   16.00   10.00
   8  -4   9   11.50    9.10
   8   4   9   24.50    4.40
   8  -4  -9   12.90   12.50
  -8  -4   9   13.10   13.00
   8   4   9    6.20    7.50
   9   4  -9   14.00    8.10
   9  -4   9    4.40    7.20
   9  -4   9    9.80    8.20
   9  -4  -9   -6.80    5.60
   9   4   9    1.60    3.30
   9  -4  -9    3.40    8.30
  -9  -4   9   21.50   16.10
   9   4   9   -6.00    6.10
   0  -5   9   77.59   24.00
   0   5   9   72.69   28.20
   0   5  -9   68.69   19.90
   0  -5  -9   97.99   42.90
   0  -5   9  125.49   30.70
   0   5   9  100.19   15.60
  -1   5   9   53.29   13.30
   1  -5   9   20.40   20.50
  -1   5   9   27.20    6.90
   1   5  -9    5.90    8.40
  -1   5   9   20.60    8.90
  -1  -5  -9  -11.50   62.19
   1   5  -9    4.90   10.50
   1  -5   9   39.60   46.90
   1   5   9   14.30    7.20
  -1   5  -9    6.90   21.50
   1  -5  -9   44.50   28.40
   1   5   9   22.40    7.70
  -1  -5   9    5.50   19.40
  -1  -5   9   93.59   34.10
   1  -5  -9   -3.00   28.30
   1   5   9    6.00   24.10
  -2  -5  -9   96.59   80.99
  -2   5   9  227.58   39.00
   2   5  -9  258.97   37.60
   2   5   9  256.77   37.90
   2   5   9  280.17   38.10
  -2  -5   9  280.57   51.29
   2   5   9  204.98   47.70
  -2  -5   9  330.77   69.19
  -2   5  -9  166.68   48.40
   3  -5   9  266.77   62.29
   3   5  -9  353.76   53.19
  -3   5  -9  231.68   73.49
   3   5   9  382.26   53.69
  -3  -5   9  493.35   75.69
   3   5   9  376.46   53.09
  -4   5   9  166.68   39.90
   4   5  -9   94.19   15.70
  -4   5   9   47.80   18.90
   4   5   9   81.09   14.50
   4   5   9  124.29   18.50
   4   5   9   86.29   24.20
   4   5   9   85.79   16.40
   4  -5  -9  152.68   57.79
   4  -5  -9   47.60   23.60
  -4  -5   9   53.79   33.50
  -5   5   9   80.89   55.09
   5  -5   9   39.90   24.00
   5   5  -9   43.60    9.90
   5   5   9   29.40   19.20
   5   5   9   69.59   11.60
   5   5   9   65.59   12.80
   5   5   9   46.20    9.10
   5  -5  -9   41.90   19.40
  -5  -5   9   45.00   32.20
   6  -5   9   41.70   20.10
   6   5  -9   36.00    8.60
   6  -5   9   31.30   12.90
   6   5   9   47.70    8.20
   6  -5  -9   15.50   23.90
   6  -5  -9   29.30   14.90
  -6  -5   9   41.50   28.70
   6   5   9   45.00   19.20
   6   5   9   80.39   16.70
  -7   5   9   24.70   20.00
   7   5  -9    4.50   12.80
   7  -5   9    5.30    9.20
  -7   5   9   -0.30    6.50
   7   5  -9   14.30    7.80
   7  -5   9   -7.80   12.90
   7  -5   9   25.90    9.60
   7  -5  -9  -16.10   16.40
   7   5   9   -1.30    2.60
  -7  -5   9   -7.40   15.10
   7  -5  -9   15.60   12.20
   7   5   9    5.60    9.10
   7   5   9   -0.80    3.70
   8   5  -9   32.60    9.90
  -8   5   9   -0.20    6.00
   8   5  -9   14.60    4.30
   8  -5   9   20.10    9.60
   8   5   9   10.50    4.00
   8   5   9    5.20    7.20
  -8  -5   9    7.10   10.10
   8  -5  -9   19.00   13.30
   0   6   9   74.69   11.90
   0  -6   9   73.59   31.80
   0   6   9   63.89   12.90
   0   6  -9   32.60   17.20
   0  -6  -9  118.89   30.70
   0  -6   9   38.00   28.80
   0  -6  -9   39.50   41.20
  -1   6   9   76.79   16.60
  -1  -6  -9  -28.50   60.09
  -1   6   9  110.09   21.10
   1  -6   9   53.69   26.00
  -1   6   9   77.49   15.00
  -1  -6   9   63.89   24.90
   1   6   9  145.09   27.00
  -1  -6   9   22.70   36.70
   1   6   9   91.09   28.00
   1  -6  -9  118.79   30.50
   1   6   9   84.99   15.20
   1   6   9   91.29   14.50
   1  -6  -9   33.30   37.40
   2   6  -9   15.30   18.80
  -2   6   9   31.70    8.20
   2   6  -9   49.70    9.40
   2  -6   9   24.20   22.10
  -2   6   9   48.30   11.70
  -2  -6  -9   -2.80   71.69
  -2   6  -9   26.80   25.20
   2   6   9   39.00    8.40
   2   6   9   -4.30   22.00
  -2  -6   9   70.09   45.50
   2  -6  -9  -25.30   26.40
   2   6   9   31.50    8.80
   2   6   9   42.00    8.40
  -2  -6   9   39.90   25.50
  -3   6   9  210.28   40.10
  -3   6   9  159.38   26.00
   3   6  -9  119.79   20.50
  -3   6   9  105.09   19.90
  -3  -6   9  225.18   60.29
  -3   6  -9   71.19   47.00
   3   6   9  132.79   21.60
   3   6   9  118.49   19.70
   3   6   9   87.99   27.20
   3  -6  -9   42.00   32.30
  -3  -6   9  171.18   37.10
   3   6   9  127.09   20.50
   4   6  -9   65.59   11.00
  -4   6   9  143.79   41.50
   4   6   9   49.40   11.10
   4   6   9   71.29   13.20
   4   6   9   21.90   20.90
  -4   6  -9  -43.40   63.09
  -4  -6   9   21.40   27.70
   4   6   9   50.69   11.10
   5   6  -9   23.30    7.10
   5  -6   9   32.70   45.30
   5   6  -9   53.39   20.20
  -5   6   9   14.80    7.20
   5  -6   9   17.40   14.40
  -5   6   9   26.70   54.49
   5   6   9   26.40   18.20
   5   6   9   17.90    7.70
  -5  -6   9   30.60   25.40
   5   6   9   32.40    8.70
   5  -6  -9    7.40   14.90
   5   6   9   31.70    6.00
   6  -6   9   13.40    8.10
   6   6  -9   -1.10    5.70
   6  -6   9    9.00   14.60
  -6   6   9    4.70    7.20
   6  -6   9   -6.40   18.70
   6   6  -9    6.20   14.70
   6   6  -9    3.00    8.50
   6   6   9   -2.50    7.60
   6   6   9    2.80    4.90
   6   6   9    9.90   11.00
  -6  -6   9  -10.40   18.50
   7  -6   9   16.40   12.50
   7  -6   9    0.00    8.40
  -7  -6  -9   -1.30   17.10
   7   6  -9   36.60   12.60
  -7   6   9    8.60    6.60
   7   6  -9   16.70    4.40
  -7  -6   9   13.90   11.80
   7   6   9    8.90    8.50
   7  -6  -9   45.50   10.40
   7   6   9   18.60    5.00
   8  -6   9    2.80   10.60
   8   6  -9   12.80    4.10
   8   6   9    9.00    4.10
   8   6   9   16.00    3.00
  -8  -6   9    3.80    8.80
   0  -7  -9   27.20   28.60
   0  -7   9   27.40   23.10
   0  -7  -9    5.70   38.10
   0   7   9    2.90   14.20
   0  -7   9   29.10   35.20
   0   7   9    7.50    5.00
   0   7   9    3.80    6.40
   0   7  -9   -2.20   16.00
  -1  -7  -9   -2.70   48.00
  -1   7   9   18.20    8.60
  -1   7   9   17.60    9.40
   1  -7   9   13.80   28.60
  -1   7   9   14.70   12.70
  -1  -7  -9   46.10   27.90
   1   7  -9   33.50   18.90
   1   7   9   24.90    6.20
   1  -7  -9   14.60   34.70
   1  -7  -9   65.59   28.50
  -1   7  -9    6.70   18.90
   1   7   9   23.90    7.70
  -1  -7   9    4.90   22.00
  -1  -7   9   30.20   42.00
   2   7  -9   70.39   13.10
  -2   7   9   61.99   12.20
  -2  -7  -9   57.19   67.99
  -2  -7  -9  118.59   30.70
  -2   7   9   83.49   15.60
   2  -7   9   52.49   26.40
  -2   7   9  125.09   22.40
   2   7   9   65.89   14.40
   2  -7  -9   11.90   31.30
  -2   7  -9   27.40   24.00
   2   7   9   73.59   13.40
   2   7   9   65.99   13.00
  -2  -7   9   31.90   48.10
  -2  -7   9   64.99   26.50
  -3   7   9   69.99   57.69
  -3   7   9   14.00    6.00
  -3  -7  -9   30.30   25.70
  -3   7   9   44.80   14.00
   3   7  -9   18.80    7.60
  -3  -7   9   16.60   25.10
  -3   7  -9  -33.10   35.20
  -3  -7   9    7.30   66.29
   3   7   9   13.10    5.80
   3   7   9   10.40    5.80
   3  -7  -9    9.40   35.20
   3   7   9   13.20    5.60
   3   7   9   43.70   21.50
   3   7   9   -5.10   18.90
  -4   7   9   73.99   14.60
   4   7  -9  110.29   26.30
   4   7  -9   82.09   15.90
  -4   7   9  171.98   43.60
   4   7   9   88.49   14.00
  -4  -7   9   43.30   23.30
   4   7   9   88.49   15.30
  -4   7  -9   20.90   52.89
   4   7   9   43.90   21.00
  -5   7   9  -86.29   52.09
  -5   7   9   15.20    7.60
  -5  -7  -9   23.00   20.80
   5  -7   9   -7.80   13.10
   5   7  -9    6.10    4.90
   5   7  -9    3.20   14.10
   5   7   9   15.80    6.80
   5   7   9    3.30    3.90
  -5  -7   9   10.10   19.60
   5   7   9   -2.50    7.70
   5   7   9   10.00   12.20
  -6   7   9   44.80    9.30
  -6  -7  -9   47.30   18.20
  -6  -7   9   31.50   15.30
   6   7   9   39.50    7.70
   6   7   9   50.79    8.90
   7   7  -9    0.60    2.80
  -7  -7  -9   10.10   12.10
  -7   7   9    9.80    5.30
   7   7  -9    2.90   13.30
   7  -7   9    0.40    6.00
   7  -7  -9   16.60    8.20
   7   7   9    5.40    2.10
   7   7   9    2.70    3.50
  -7  -7   9   -3.70    9.10
   0  -8  -9    1.40   25.10
   0   8   9    2.40    7.00
   0  -8   9   -1.00   38.10
   0  -8  -9   12.90   54.09
   0   8   9    3.30    4.20
   0   8  -9   25.20   23.80
   0  -8   9   -4.60   23.30
  -1  -8  -9  -14.20   52.69
   1  -8   9   10.60   31.70
  -1  -8  -9   48.80   25.00
   1   8  -9    2.30   29.90
  -1   8   9   29.10    9.70
  -1   8   9   88.19   20.90
  -1  -8   9   64.29   50.39
   1   8   9   33.40    8.30
  -1  -8   9   -1.90   22.30
  -1   8  -9    7.20   20.90
   1   8   9   34.50    6.50
   1  -8  -9   -5.10   32.20
  -2  -8  -9  -42.30   71.49
  -2   8   9    1.70    4.50
   2  -8   9   24.80   27.40
  -2   8   9   20.30   20.30
  -2   8   9   12.70   19.40
  -2  -8  -9   -6.60   20.80
   2  -8  -9   17.30   26.20
  -2  -8   9  -15.00   51.49
  -2   8  -9   17.20   20.90
   2   8   9    9.20    4.30
   2   8   9    2.60    5.30
  -2  -8   9   -8.70   19.90
  -3   8   9   30.00    7.30
  -3  -8  -9   26.10   22.60
  -3   8   9   35.10   28.50
   3   8  -9   26.40    7.80
  -3   8  -9   22.60   28.40
   3   8   9   38.30    7.80
   3   8   9   33.10    8.70
  -3  -8   9    1.50   22.00
  -3  -8   9  -17.70   66.69
   3  -8  -9  -41.00   57.29
  -4   8   9   22.40    5.60
  -4  -8  -9   22.30   18.50
   4   8  -9   18.10    5.80
   4   8  -9    8.60   13.60
  -4   8   9   39.00   38.70
   4   8   9   18.50    5.70
   4   8   9   19.50    8.60
   4   8   9   19.20    4.80
   4   8   9   10.80    4.90
  -4  -8   9    2.10   14.90
   5   8  -9   12.10    4.70
  -5   8   9   27.70    5.90
   5   8  -9   14.10   11.80
  -5  -8  -9    7.80   13.10
  -5  -8   9   19.10   12.80
   5   8   9   16.30    6.80
   5   8   9   16.90    4.10
  -6  -8  -9   26.80   13.60
  -6   8   9   14.30    7.10
   6   8  -9    8.20    3.50
  -6  -8   9    3.40    9.20
   6   8   9   10.80    2.70
   6   8   9    0.10    6.20
   0  -9   9   73.79   43.90
   0  -9  -9   23.70   47.90
   0  -9  -9   45.30   23.10
   0   9  -9   58.19   45.60
  -1   9   9   29.50    5.60
   1  -9   9   15.20   38.70
  -1   9   9   16.70   12.20
  -1  -9  -9   -7.00   91.39
   1   9   9   35.10    8.00
  -1  -9   9   23.60   14.90
   1   9   9   21.00    5.10
   1  -9  -9   33.40   36.40
  -1   9  -9  -37.30   34.80
  -1  -9   9   -7.80   51.09
  -2  -9  -9   -1.00   14.40
  -2   9   9    0.50    3.10
  -2  -9   9   16.90   14.70
   2   9   9   -1.30    4.40
  -2   9  -9   -3.00   26.20
  -3  -9  -9   14.90   14.70
  -3  -9   9   -5.30   12.80
   3   9   9    8.90    5.30
  -4  -9  -9    8.80   11.10
  -4   9   9   15.60    4.40
  -4  -9   9   -7.20   10.30
   4   9   9    7.10    5.90
   4   9   9   17.30    4.90
  -5   9   9    6.90    5.40
  -5  -9  -9    5.50   11.00
  -5  -9   9    0.80    8.40
   5   9   9    2.20    3.90
   0  10   9   10.90    8.40
   0  10   9   17.10    3.80
  -2 -10  -9   16.70   16.40
  -2  10   9   16.90    3.80
   2  10   9    9.90    5.00
   2  10   9   15.70    3.70
  -3  10   9    0.80    3.20
  -3 -10  -9   26.10   15.20
  -3 -10   9   11.10   15.50
   3  10   9   -0.30    3.60
   3  10   9    8.50    3.50
  -4 -10  -9    2.40   14.00
  -4  10   9   13.90    4.00
  -4 -10   9   13.70   13.00
   0   0 -10  826.12  124.99
  -1   0 -10  -10.90   80.59
  -1   0  10   28.50   23.80
   1   0 -10    3.60   16.30
  -1   0 -10   34.70   23.30
  -1   0  10   14.50   22.70
   2   0 -10    6.10   15.00
  -2   0  10    8.10   15.20
  -2   0 -10   51.99   31.30
  -2   0  10   15.50   28.70
   2   0  10   21.30   10.80
  -3   0  10  117.89   39.00
   3   0 -10   84.59   22.60
   3   0  10  119.99   33.60
  -3   0  10  126.39   27.30
   4   0  10  -24.40   26.30
   4   0 -10   -5.80    7.40
  -4   0  10   -4.10   32.90
  -4   0  10  -26.90   41.80
   4   0 -10  -11.60   23.70
   4   0  10   26.60   22.10
   5   0  10   34.70   25.10
   5   0  10    9.90    7.30
  -5   0  10    2.20   28.60
   5   0 -10   24.10    8.50
   5   0  10    2.10   24.10
   5   0 -10   44.10   19.80
   6   0  10   -4.60    8.20
   6   0  10    1.30    6.10
   6   0  10   11.10   19.10
   6   0 -10    0.70   15.60
  -6   0  10   16.50   26.70
   6   0  10   10.00   18.30
   6   0 -10   14.80   17.60
   7   0  10   33.30   13.50
   7   0  10   18.30    7.50
   7   0 -10   49.20   14.90
  -7   0  10    2.00   20.20
   7   0  10    6.50   21.60
   7   0 -10   50.29   14.20
   7   0  10   28.10   14.20
   8   0 -10   13.10   10.10
   8   0 -10   -3.50    8.30
  -8   0  10   -5.10   12.90
   8   0  10    8.80    4.40
   8   0  10   18.30    8.80
  -9   0  10    7.30   10.70
   9   0 -10    6.90    7.40
   9   0  10    5.70    5.60
   9   0  10    6.10    4.80
   0  -1  10  -13.30   23.60
   0  -1 -10   -2.40   21.70
   0   1 -10  -15.00   16.60
   0  -1  10   13.40   10.30
   0   1 -10   11.80   81.09
   0  -1 -10   18.70   80.09
   0   1  10    6.90   22.20
   0   1  10    9.70   10.50
   1  -1  10  916.21  130.99
  -1   1  10  823.32  136.29
  -1  -1 -10 1086.19  194.68
  -1   1 -10  799.62  199.18
  -2   1  10  234.68   41.90
  -2  -1 -10  136.99   46.60
   2  -1  10  189.78   29.90
  -2  -1  10  122.19   37.70
   2   1  10  173.58   29.80
  -2   1 -10   85.29   39.90
   3   1 -10    3.60   12.70
   3  -1  10   32.40   33.40
  -3   1  10   26.60   24.60
   3  -1  10    4.80   16.20
   3   1 -10    9.90    5.60
  -3   1  10    6.30   30.80
  -3  -1  10  -15.90   21.20
   3  -1 -10   34.20   15.70
  -3  -1  10   36.10   35.60
   3   1  10    4.00   23.60
   3   1  10   29.80   11.30
   3   1  10   22.40   10.10
   4  -1  10   27.20   18.50
  -4   1  10   60.59   32.70
   4   1 -10   33.90    8.80
   4  -1  10  111.09   31.90
  -4   1  10   44.60   30.90
   4   1  10   31.10   24.50
   4   1  10   53.59   10.60
  -4  -1  10   76.99   37.30
   5   1 -10  192.38   27.80
  -5   1  10  189.88   40.50
   5  -1  10  148.69   27.50
   5   1  10  158.78   27.40
   5   1  10  218.98   38.80
  -5  -1  10  181.38   41.90
   6   1 -10   37.00    9.50
   6  -1  10    7.20   16.00
   6  -1  10   27.00   18.40
   6  -1  10   29.10    9.10
  -6   1  10   25.40   24.70
   6   1  10   40.80   21.30
   6  -1 -10   61.69   17.60
   6   1  10   32.50    8.80
   6  -1 -10   71.49   20.30
  -6  -1  10   16.90   27.80
   6   1  10   48.20    9.40
   7  -1  10    4.20    6.90
   7   1 -10   16.40   13.40
   7  -1  10   14.40   13.50
   7   1 -10   17.10    7.70
   7   1 -10   24.00   16.30
   7  -1  10  -11.50   12.10
  -7   1  10   -9.30   21.20
  -7  -1  10    0.00   21.60
   7   1  10    6.00    5.80
   7  -1 -10    7.70   12.00
   7  -1 -10    3.40   13.10
   7   1  10    6.40    9.00
   7   1  10   -5.40   13.70
   8  -1  10   17.10    9.20
   8  -1  10   -0.40    5.90
   8   1 -10    5.30    9.30
   8  -1  10    3.40    7.50
  -8   1  10   -4.70   14.00
   8   1 -10   -1.80    9.80
  -8  -1  10    6.10    6.50
   8   1  10   -2.00    3.90
   8  -1 -10   -2.50    8.50
   8   1  10    8.00    8.20
   8  -1 -10    6.40    9.40
  -8  -1  10    6.30   13.50
   9   1 -10   18.00    8.00
   9  -1  10   -1.70    5.90
  -9   1  10   -0.30   11.00
   9   1 -10   -5.00    6.80
   9  -1  10   20.00   10.10
   9   1  10    1.40    3.90
   9  -1 -10    7.90    6.20
   9   1  10    5.00    5.00
  -9  -1  10    2.70   10.50
   9  -1 -10   -0.70    6.60
   0   2 -10   79.59   21.70
   0  -2  10  116.49   23.60
   0  -2 -10   64.19   95.39
   0   2  10   64.69   12.90
   0  -2 -10   43.70   27.80
   0  -2  10    8.90   28.00
   0   2 -10   69.39  101.09
  -1  -2 -10   -4.10   33.10
  -1   2  10   17.10    7.50
  -1   2  10   40.40   26.00
   1   2 -10    5.50   14.10
   1  -2  10   17.20   13.40
  -1   2  10   27.10   13.60
  -1  -2 -10   84.19  112.29
   1   2  10    8.20    7.20
   1   2  10   -5.30   22.90
  -1   2 -10    3.20   22.70
  -1  -2  10   11.50   19.00
  -1   2 -10  -13.60  100.79
  -1  -2  10   35.30   15.90
   1  -2 -10  -11.70   17.00
   2   2 -10  165.18   31.00
   2   2 -10  140.09   25.00
   2  -2  10  228.48   37.00
  -2  -2 -10  208.58   54.59
   2   2  10  174.88   37.00
   2   2  10  183.68   26.80
  -2   2 -10  100.29   41.60
  -2  -2  10  229.48   45.20
   2  -2 -10  163.48   34.50
  -3   2  10   36.70   12.20
   3   2 -10   51.69   10.20
   3   2 -10   40.90   15.10
   3  -2  10   57.39   19.20
  -3  -2  10   84.19   35.50
   3   2  10   89.69   24.70
   3   2  10   75.79   15.10
  -3   2 -10   53.09   57.19
   3  -2 -10   50.19   19.90
   4   2 -10   90.79   27.00
  -4   2  10  117.19   35.30
   4  -2  10  122.29   33.70
  -4   2  10   63.09   31.10
   4   2 -10   41.60    8.70
   4  -2  10   16.90   17.80
   4  -2 -10   75.39   24.10
  -4  -2  10   31.90   37.20
   4   2  10   27.90   11.30
   4   2  10   50.09   13.90
   4   2  10   29.80   24.20
   5   2 -10  230.08   36.20
  -5   2  10  261.27   54.19
   5   2  10  237.08   35.80
   5   2  10  200.48   46.90
   5   2  10  240.18   36.70
  -5  -2  10  280.97   53.09
  -6   2  10   45.90   26.30
   6  -2  10   36.30   18.10
   6  -2  10  107.39   21.50
   6  -2  10   37.70   11.00
   6   2 -10   57.09   11.00
   6  -2 -10   66.39   19.20
   6  -2 -10   49.00   16.50
   6   2  10   48.10   22.50
  -6  -2  10   25.40   27.90
   6   2  10   57.59   11.70
   7  -2  10  -19.90   13.20
   7  -2  10   -1.80    7.60
   7   2 -10   17.80   15.40
  -7   2  10    4.40   23.50
   7  -2  10   -2.50   12.60
   7   2 -10   -5.10    7.30
   7   2 -10   13.80   16.70
   7   2  10    2.00   15.10
   7   2  10   -1.90    7.50
   7   2  10    5.90    5.60
  -7  -2  10   -2.20   28.70
   7  -2 -10    7.10   13.40
   7  -2 -10   -7.90   15.50
  -8   2  10   10.20   14.70
   8   2 -10   24.30   10.50
   8  -2  10   29.10    9.30
   8  -2  10   28.00    7.70
   8  -2  10   10.10    8.90
   8  -2 -10    8.70    8.10
  -8  -2  10   22.40   13.80
   8  -2 -10   32.20   10.90
   8   2  10   28.30    8.80
   8   2  10   25.10    5.70
   8   2  10   23.00    6.40
   9   2 -10   25.10   11.90
   9  -2  10   13.40    9.10
  -9   2  10    9.90   10.60
   9  -2  10   10.60    6.90
   9   2 -10   25.80    9.30
  -9  -2  10   15.90   10.50
   9  -2 -10    1.30    5.80
   9   2  10    3.70    5.60
   9  -2 -10   11.60    7.20
   9   2  10    6.40    3.50
   0  -3  10  334.37   52.69
   0   3  10  282.07   45.00
   0   3  10  308.37   55.89
   0   3 -10  286.37   60.19
   0  -3 -10  292.27   61.19
  -1   3  10   15.10    8.40
   1  -3  10   36.20   16.60
  -1  -3 -10   59.79   41.50
  -1   3  10   80.69   26.00
   1   3 -10   11.20   13.70
   1   3  10   31.00   22.20
  -1  -3  10   61.49   37.20
   1  -3 -10  -13.30   25.80
   1   3  10   26.50    8.20
  -1  -3  10   35.00   19.40
  -2  -3 -10   30.00   67.89
   2   3 -10   15.60    5.80
  -2   3  10   63.29   27.90
  -2   3  10   26.60    9.60
   2  -3  10   43.20   16.70
   2  -3  10    4.70   12.20
   2   3 -10   25.00   11.60
  -2  -3  10   67.19   35.40
  -2   3 -10    4.60   47.50
   2   3  10   61.59   14.30
   2  -3 -10   13.50   19.90
   2   3  10   38.30    8.40
  -2  -3  10   14.50   23.60
   2   3  10   25.10   18.90
   3   3 -10  199.48   31.60
  -3   3  10  158.68   34.00
   3   3 -10  237.88   39.80
   3   3  10  232.38   40.30
   3   3  10  248.08   32.90
  -3  -3  10  278.97   56.59
  -3   3 -10  111.39   71.69
  -3  -3  10  370.16   64.79
   3  -3 -10  173.88   40.90
  -4   3  10  122.79   26.90
   4   3 -10  144.29   21.20
   4   3  10  113.39   29.20
   5  -3  10   22.50   14.60
  -5   3  10   49.30   26.20
   5  -3  10    8.60   22.70
  -5   3  10    5.80   10.90
   5   3 -10    8.50    5.70
   5   3 -10   43.70   21.10
   5   3  10   11.60   20.60
   5  -3 -10   18.60   20.10
   5   3  10   18.00    7.70
  -5  -3  10   19.70   33.20
   5   3  10    9.70    5.20
   5  -3 -10   14.20   19.70
   6   3 -10   81.79   20.00
   6  -3  10   67.49   19.50
  -6   3  10   63.09   26.90
   6  -3  10   42.80   12.30
   6   3 -10   57.09   11.10
  -6  -3  10   42.90   29.30
   6   3  10   66.79   10.00
   6   3  10   33.90   20.30
   6  -3 -10   58.79   18.20
   6   3  10   36.50   10.00
   7   3 -10   53.79   17.70
   7  -3  10   18.80   10.10
  -7   3  10   50.39   27.10
   7  -3  10   19.40   15.10
   7  -3 -10   41.10   19.70
  -7  -3  10   42.00   21.50
   7   3  10   42.90    9.90
   7   3  10   36.90   27.10
   7   3  10   28.00    9.40
   8   3 -10   41.20    9.50
   8  -3  10   65.69   12.20
  -8   3  10   52.49   15.90
   8   3  10   40.10    8.50
   8  -3 -10   51.39   12.70
  -9   3  10    2.00    5.50
   9   3 -10    0.00    8.70
   9  -3  10    5.80    7.80
   9  -3  10    0.10    5.90
  -9   3  10   -9.90   10.80
   9   3 -10    9.10    8.10
   9  -3 -10   -9.70    5.60
   9   3  10    4.30    3.70
   9  -3 -10    2.80    7.40
   9   3  10    6.40    5.00
  -9  -3  10  -14.00    9.90
   0   4  10  209.88   55.19
   0  -4  10  347.57   53.69
   0   4  10  296.27   46.00
   0   4  10  338.77   46.40
   0  -4 -10  280.97   60.69
   1   4 -10   20.50   12.50
  -1   4  10   33.00   25.10
  -1   4  10   18.90    8.20
   1  -4  10   57.39   17.90
  -1  -4 -10  -25.70   51.09
   1   4 -10   14.60    7.10
  -1   4 -10   16.20   24.80
   1  -4 -10   13.00   27.00
   1   4  10   19.90    6.70
   1   4  10    3.80    8.00
  -1  -4  10   56.79   26.10
  -1  -4  10   18.20   18.00
   1   4  10  -12.40   19.80
  -2   4  10   27.80    9.30
   2   4 -10   18.40   11.10
   2  -4  10    7.20   11.00
  -2  -4 -10   48.00   83.99
   2  -4  10   15.70   17.00
   2   4 -10   17.70    6.00
   2   4  10   31.80    7.90
  -2  -4  10   14.00   21.40
  -2   4 -10   27.40   33.80
   2   4  10   22.40   19.70
  -2  -4  10   43.20   31.20
   2   4  10   54.49   16.00
   2  -4 -10   -0.30   21.90
  -3   4  10   42.80   25.20
  -3   4  10   54.69   26.20
   3  -4  10    7.50   12.40
   3  -4 -10   18.40   21.00
  -3   4 -10  -13.50   52.59
   3  -4 -10   28.30   30.10
  -3  -4  10   33.30   29.10
  -3  -4  10   38.60   38.00
   3   4  10   32.20   18.10
   3   4  10   30.50   11.10
   4   4 -10   63.49   12.70
  -4   4  10   53.79   14.90
  -4   4  10   96.49   28.80
   4   4 -10   81.39   27.80
  -4   4  10   42.20   37.20
   4  -4  10  102.19   52.19
  -4  -4  10   94.99   36.20
   4   4  10   70.89   13.60
   4   4  10   66.09   22.50
   4   4  10   55.69   12.10
   4   4  10   74.49   13.10
   4  -4 -10   56.59   24.40
  -5   4  10  -39.60   43.50
   5  -4  10   -9.10   12.00
   5   4 -10   12.40    6.20
   5   4 -10   31.30   21.00
   5  -4  10   31.90   24.50
  -5   4  10    6.30   11.60
  -5   4  10   35.40   25.10
   5   4  10    4.80    4.80
   5   4  10   45.90   18.50
   5  -4 -10    5.30   18.30
  -5  -4  10    6.10   30.10
   5   4  10   13.50   10.70
   5  -4 -10    1.60   22.50
   5   4  10   21.70    7.90
  -6   4  10   50.89   23.60
   6  -4  10   35.80   19.80
   6   4 -10   41.70    9.20
   6   4  10   31.10    8.60
   6   4  10   51.29   27.60
  -6  -4  10   11.70   24.70
   6   4  10   15.80   17.20
   6  -4 -10   22.90   15.90
   6   4  10   49.30    7.60
   6  -4 -10   19.40   21.00
   7  -4  10   87.59   17.60
   7   4 -10   95.19   14.80
   7   4  10   63.89   18.40
   7  -4 -10  108.89   24.90
   7   4  10   87.79   14.60
   7   4  10   81.99   13.70
   8  -4  10    3.50    8.70
   8   4 -10    1.30    3.70
   8   4 -10   11.00    8.20
   8  -4  10   -2.00    7.30
   8   4 -10    5.30    9.80
  -8   4  10   14.60   12.30
  -8   4  10   -0.50    4.30
   8  -4  10    7.10    9.90
   8   4  10    2.70    2.60
   8   4  10    0.30    3.00
   8   4  10    5.10    6.70
  -8  -4  10   -4.90   10.40
   8  -4 -10  -11.00   12.90
   0  -5  10   42.70   19.90
   0   5  10   43.50    8.70
   0  -5  10   62.09   26.90
   0  -5 -10   -6.40   37.40
   0   5 -10   30.20   16.90
  -1  -5 -10   75.09   65.39
   1   5  10  239.38   35.30
  -1   5 -10  196.88   45.10
  -1  -5  10  227.58   47.60
   1   5  10  226.38   34.50
  -1  -5  10  280.77   56.79
   2   5 -10   55.59   17.70
  -2  -5 -10   95.99   69.19
   2   5 -10   42.60    9.70
  -2   5  10   66.49   12.10
   2  -5  10    9.20   21.10
   2  -5 -10   79.09   33.00
  -2  -5  10   50.29   35.90
   2   5  10   53.69   11.60
  -2  -5  10   75.89   24.30
  -2   5 -10   53.19   31.70
   2  -5 -10   13.60   25.90
   2   5  10   75.69   22.80
  -3   5  10  118.49   25.10
   3   5 -10  148.99   22.00
  -3  -5  10   95.29   47.70
   3   5  10  147.99   21.90
   3   5  10  133.29   22.80
  -3  -5  10  194.98   38.10
   3   5  10  122.29   29.40
  -3   5 -10    0.00   54.09
  -4   5  10   34.40   37.00
   4  -5  10    7.70   13.60
  -4   5  10   10.90   11.70
   4   5 -10   29.90   25.10
   4   5 -10   22.30    6.50
  -4  -5  10  -24.70   26.90
   4   5  10   20.10    7.70
   4   5  10   24.70   17.90
   4   5  10   21.70    5.60
   4  -5 -10    4.90   20.30
   4   5  10   27.40    9.40
   5  -5  10   14.60   14.80
  -5   5  10   54.99   52.09
  -5   5  10   82.69   24.50
   5  -5  10   92.99   29.80
   5   5 -10   29.20    7.40
   5   5 -10   56.79   21.30
   5   5  10   23.30    8.20
   5   5  10   40.50   19.70
   5   5  10   36.70    7.50
   5  -5 -10    6.50   17.40
  -5  -5  10   52.89   29.00
   6  -5  10   36.80   20.10
   6  -5  10   21.70    9.20
   6  -5  10    7.00   19.00
   6   5 -10   31.50   11.40
   6   5 -10   39.80   16.30
  -6   5  10   64.09   34.30
   6  -5 -10  -12.10   18.70
   6   5  10   12.00   22.60
   6   5  10   29.70   10.30
  -6  -5  10   14.10   23.40
   6   5  10    9.90    8.10
   6   5  10   17.00    6.10
   7   5 -10   29.80    5.90
   7  -5  10   16.70   13.60
   7  -5  10   27.50    9.60
   7  -5  10   11.20   10.50
  -7   5  10   34.90   14.30
   7   5  10   23.30    4.60
  -7  -5  10    3.40   12.50
   7   5  10   29.90    5.60
   7   5  10   16.60   10.10
   8  -5  10    7.90    9.10
  -8   5  10   10.30    2.80
   8   5 -10   17.30    4.10
   8  -5  10   -3.40    6.30
   8   5  10    2.00    9.30
   8   5  10   10.10    2.60
  -8  -5  10   17.90   10.20
   0  -6  10   38.10   22.50
   0   6 -10   73.99   30.10
   0  -6  10    7.50   27.40
   0  -6 -10  -10.90   38.40
   0   6  10   28.20    7.20
   0   6  10   36.40    8.80
   1  -6  10   41.90   27.90
   1   6 -10   60.09   21.70
  -1   6  10   99.59   16.30
  -1   6  10  104.09   17.50
  -1  -6 -10    2.60   45.70
   1   6  10   82.79   16.20
   1   6  10  167.88   28.10
   1  -6 -10   51.69   38.40
   1   6  10  117.39   17.40
  -1  -6  10  103.39   26.70
  -1  -6  10  104.79   45.30
  -2   6  10   49.80   17.70
  -2   6  10   64.29   12.20
   2  -6  10   15.30   23.50
   2   6 -10   55.89   10.60
   2   6 -10   38.80   25.00
  -2   6  10   38.60    9.20
  -2  -6 -10  -22.70   62.69
   2   6  10   58.79   11.30
   2  -6 -10  -25.60   29.00
   2   6  10   47.90    9.50
   2   6  10   56.89   11.50
   2   6  10   50.99   20.70
  -2  -6  10   34.50   44.90
  -2  -6  10   54.49   23.30
  -2   6 -10   52.49   26.80
  -3   6  10   98.59   19.40
  -3   6  10   70.09   26.90
   3   6 -10   72.09   14.50
  -3   6  10   65.39   13.30
  -3  -6  10  109.49   29.40
   3   6  10   71.49   12.90
  -3   6 -10   24.40   40.20
  -3  -6  10   40.60   49.40
   3   6  10   90.39   13.90
   3   6  10   45.80   20.50
   3   6  10   41.30   15.20
   3  -6 -10   68.79   28.60
   4   6 -10   80.89   14.20
  -4   6  10   97.99   37.00
  -4   6  10   58.89   13.50
   4   6  10   44.10   20.20
  -4   6 -10    3.60   63.29
  -4  -6  10   58.39   27.10
   4   6  10   69.39   12.40
   4   6  10   82.59   14.10
  -5   6  10   19.00    7.60
   5   6 -10   54.99   17.80
   5  -6  10   13.00   14.40
  -5   6  10  -61.19   49.20
   5   6 -10   22.70    7.50
   5   6  10   22.60   17.70
   5   6  10    4.50    9.50
   5   6  10   32.40    6.00
  -5  -6  10   14.80   26.80
   6  -6  10   31.00    7.90
   6   6 -10   23.90   12.90
   6   6 -10   11.20    4.40
  -6  -6 -10   30.40   18.40
  -6   6  10    4.30    4.70
   6  -6  10    3.60    9.10
   6  -6  10   11.90   18.40
   6   6  10   24.40    5.90
   6   6  10   26.70   10.30
  -6  -6  10    8.40   13.90
   6   6  10   16.80    7.50
   6   6  10    4.80    2.80
   7  -6  10   -2.30   29.50
   7   6 -10   -3.60    3.40
  -7  -6 -10   13.40   14.20
   7   6 -10   -2.00   21.40
   7  -6  10    7.80    6.80
  -7   6  10    5.00    4.40
   7   6  10    3.60    3.30
   7   6  10    9.30    7.20
  -7  -6  10    2.10   10.10
   7   6  10    6.50    2.20
   0  -7 -10    5.40   21.50
   0   7 -10  -33.20   18.30
   0  -7  10   21.00   22.40
   0   7  10    8.00    6.20
   0   7  10    9.50    4.90
   0   7  10   -7.30   17.50
   0  -7 -10   11.80   39.90
   0  -7  10   -3.10   30.80
   1   7 -10   17.10   27.40
  -1   7  10   26.40    6.70
  -1   7  10   54.49   26.80
   1  -7  10   13.40   36.90
  -1   7  10   24.40    8.60
  -1  -7  10   13.00   24.10
   1   7  10   40.90    7.10
  -1  -7  10   -5.90   48.80
   1  -7 -10   11.10   33.30
  -1   7 -10   15.80   20.40
   1   7  10   38.10    7.90
   1   7  10   17.40    8.60
  -2  -7 -10   56.99   65.29
  -2   7  10   63.59   12.10
   2  -7  10   35.30   27.30
  -2   7  10   86.79   31.60
   2   7  10   71.89   12.60
   2   7  10   63.39   13.10
   2  -7 -10   33.30   46.40
  -2  -7  10   56.79   52.29
   2   7  10   63.59   12.20
  -2  -7  10   36.60   24.00
  -2   7 -10   60.19   39.40
  -3   7  10   40.40   26.60
   3   7 -10   46.20    9.70
  -3   7  10   29.40    8.10
  -3   7  10   97.99   21.80
   3   7  10   31.90   18.40
  -3  -7  10   47.80   24.50
  -3   7 -10   16.50   33.30
   3  -7 -10   68.49   36.10
  -3  -7  10  -49.70   59.49
   3   7  10   38.90    8.70
   3   7  10   53.39   10.20
   3   7  10   63.69   10.10
  -4   7  10   18.40   37.20
   4   7 -10   50.09   12.20
  -4   7  10   82.29   14.90
   4   7  10   12.50   22.60
   4   7  10   42.10    9.90
  -4   7 -10  -33.00   63.49
   4   7  10   60.49   13.90
  -4  -7  10   43.60   26.20
   5   7 -10   -1.00    4.20
  -5  -7 -10   11.20   17.60
  -5   7  10   -1.20    4.60
   5   7 -10    6.10   13.40
   5   7  10    8.10    4.80
   5   7  10    1.00    2.80
   5   7  10    7.00    9.90
   5   7  10    1.70    6.20
  -5  -7  10    8.20   14.30
  -6  -7 -10  -11.20   13.10
  -6   7  10    6.30    4.40
   6   7 -10   -1.30    3.00
   6   7 -10   10.70   14.70
   6   7  10    0.30    4.20
   6   7  10    4.40    2.60
  -6  -7  10  -16.10    9.80
  -7  -7 -10    4.50   12.80
  -7   7  10    2.40    3.80
   7   7 -10    0.20    3.80
   7   7  10   -2.50    3.40
   7   7  10   -0.10    1.80
  -7  -7  10    5.00    8.30
   0   8  10   19.10    8.20
   0   8  10   20.70    5.70
   0  -8  10   33.10   35.50
   0   8 -10   31.80   31.90
   0  -8 -10   45.60   24.20
   0  -8 -10   20.20   50.59
  -1  -8 -10   14.50   66.99
  -1   8  10   14.60    4.90
   1  -8  10    3.10   30.90
  -1   8  10   15.00   13.30
  -1   8  10  -13.90   22.20
   1   8 -10   12.90   56.29
  -1  -8 -10   48.00   23.10
   1   8  10   12.80    5.20
   1  -8 -10  -32.30   29.90
  -1  -8  10   10.90   41.70
  -1  -8  10   19.90   25.60
   1   8  10   16.70    6.80
  -1   8 -10    2.10   23.10
  -2   8  10   68.29   27.80
  -2   8  10   38.60    9.10
  -2   8  10   50.59   11.60
  -2  -8 -10   41.60   74.09
  -2  -8  10  -16.10   56.69
   2  -8 -10  -11.80   27.30
   2   8  10   18.90    6.20
   2   8  10   56.19   13.40
  -2  -8  10   14.90   30.70
   2   8  10   31.10    9.60
  -2   8 -10    2.30   23.70
  -3   8  10   19.50    5.20
  -3  -8 -10   28.70   18.90
  -3   8  10  -30.50   30.20
  -3   8 -10   38.50   43.60
   3   8  10   22.30    6.00
  -3  -8  10   15.30   18.80
   3   8  10   15.40    4.40
   3   8  10   12.40    5.40
  -4  -8 -10    8.60   12.90
  -4   8  10   11.70    4.40
   4   8  10    4.90    3.50
  -4  -8  10   -1.10   12.10
   4   8  10   -5.20    3.90
  -5   8  10   14.40    4.40
  -5  -8 -10    2.30   12.30
   5   8  10  -12.00   12.00
   5   8  10    8.70    3.70
   5   8  10    3.10    2.70
  -5  -8  10  -11.60    9.40
  -6  -8 -10   20.60   10.40
  -6   8  10    6.20    3.90
  -6  -8  10   -3.40    8.40
   6  -8 -10    1.40    7.10
   6   8  10    6.20    2.30
  -1   9  10   23.30    9.10
  -1  -9 -10   59.99   16.70
  -1   9  10   23.20    4.90
   1   9  10   21.60    4.90
   1   9  10   23.10    7.00
  -2   9  10   13.80    4.10
  -2  -9 -10   17.70   13.50
  -2  -9  10    7.20   13.80
   2   9  10   23.90    4.30
   2   9  10   24.80    5.50
  -3  -9 -10   24.40   12.50
  -3   9  10    7.90    3.50
   3   9  10   14.40    4.40
  -3  -9  10    4.00   13.70
   3   9  10    9.90    4.30
  -4  -9 -10   22.10   11.30
   4   9  10   13.90    4.10
  -4  -9  10    6.60   12.80
  -5   9  10   11.30    3.40
  -5  -9 -10   18.30   12.50
  -5  -9  10   -7.70   10.40
   0  10  10   34.50    6.30
   0  10  10   25.10    8.90
  -1  10  10    7.60    3.10
   1  10  10    7.70    3.00
   1  10  10   -0.60    5.50
  -2  10  10   55.79    9.30
   2  10  10   54.29   10.00
   2  10  10   62.99   10.40
  -3 -10 -10   21.80   15.40
  -3  10  10    8.60    3.10
   3  10  10    7.70    3.20
   0   0  11    7.80    6.80
   0   0  11   15.90   15.40
   0   0  11    0.40   22.60
   0   0 -11  -10.00   35.90
  -1   0 -11  269.67   73.69
  -1   0  11  474.05   68.69
  -2   0  11  271.67   55.29
   2   0  11  229.98   50.99
   2   0  11  275.07   44.70
   3   0  11    8.40   31.40
  -3   0  11   52.19   31.90
  -3   0  11   73.29   28.40
  -4   0  11   10.50   30.50
   4   0  11   28.10    8.80
  -4   0  11   38.50   32.10
   4   0  11   49.20   28.00
   5   0 -11  -10.00   21.20
  -5   0  11  -33.70   25.40
   5   0  11    6.50    6.10
   5   0  11   -7.80   22.70
   5   0  11    2.90   26.40
   6   0 -11   22.20   15.40
   6   0  11    3.90    8.30
   6   0 -11   -4.60   17.50
   6   0  11   23.00   18.90
   6   0  11   -2.00    5.50
  -6   0  11  -10.20   20.40
   6   0  11  -11.90   19.00
   7   0  11   -7.00   19.60
   7   0 -11   48.60   21.30
  -7   0  11   -1.40   19.90
   7   0  11    5.70    8.00
   7   0 -11    8.10   14.80
   7   0  11   15.70    7.20
   7   0  11   24.80   18.30
  -7   0  11   -4.90    5.90
   8   0 -11    0.30    8.00
  -8   0  11   -3.00   10.50
   8   0 -11    1.90    9.40
   8   0  11    1.70    4.20
   8   0  11    3.00    6.20
   9   0  11    1.60    6.00
  -9   0  11    6.10    9.10
   9   0 -11   17.80    7.90
   9   0  11   11.40    4.80
   9   0 -11   19.50    8.00
   0   1  11   31.80   15.20
   0   1  11    2.40    6.80
   0   1 -11   13.30   41.80
   0  -1  11    7.80   14.30
   0  -1  11    8.10   21.40
   0   1  11   14.10   24.40
   1  -1  11   11.90    9.10
  -1  -1 -11   -0.70   34.90
   1   1 -11   -1.20   17.30
  -1   1  11    1.40    7.80
  -1   1  11   67.99   20.70
  -1   1  11   -6.10   23.20
   1  -1  11   28.30   14.50
   1  -1 -11   -0.20   21.10
   1   1  11   26.10   15.10
   1   1  11   -3.80    7.10
  -1   1 -11   10.40   37.70
  -1  -1  11   24.40   19.80
  -1  -1  11  -11.60   22.20
   1   1  11   19.00   26.40
  -2   1  11   15.70    9.80
  -2   1  11    5.10   24.70
  -2   1  11   55.39   22.50
   2  -1  11   29.00   15.80
   2   1 -11    5.60   14.50
  -2  -1 -11   -2.40   60.39
   2   1  11   27.30   25.70
  -2  -1  11   19.80   26.20
   2   1  11   -5.20   15.50
   2  -1 -11   -0.40   17.70
   2   1  11   38.40    8.80
  -2  -1  11   32.00   20.90
  -3   1  11  -11.60   22.30
   3   1 -11   14.60   15.50
   3  -1  11   24.70   35.80
   3  -1  11    0.00   15.30
  -3   1  11   26.10   29.10
  -3  -1  11   -7.80   23.00
   3  -1 -11  -30.40   16.90
   3   1  11   16.10   25.30
   3   1  11    2.90    9.10
   3   1  11    6.10   10.00
  -3  -1  11    8.00   29.70
   4  -1  11   18.70   17.80
  -4   1  11    6.50   27.00
   4  -1  11   11.90   31.30
  -4   1  11  -19.60   28.30
   4   1 -11   16.50    6.30
  -4  -1  11  -16.30   31.30
  -4  -1  11   -4.00   29.50
   4   1  11   23.50   25.30
   4   1  11   12.50    7.60
   5   1 -11   54.59    9.80
  -5   1  11   30.40   25.00
   5  -1  11   88.39   27.80
   5  -1  11   29.20   19.10
   5  -1  11   41.50    9.50
  -5   1  11   16.70    9.70
  -5  -1  11   50.89   28.70
   5   1  11   32.20    8.60
   5   1  11   76.69   26.90
   6  -1  11   14.00   15.00
  -6   1  11    0.40    7.40
   6  -1  11   -6.60   15.20
   6   1 -11    9.80   19.00
   6  -1  11    2.10   16.70
   6   1 -11   14.50   15.50
  -6   1  11  -11.10   19.40
   6  -1  11   -0.50    6.50
   6   1  11   32.00   17.00
   6  -1 -11   -6.80   16.50
  -6  -1  11   14.10   22.50
   6  -1 -11   29.20   15.90
   6   1  11    4.90    5.60
   6   1  11   14.70    7.20
   7  -1  11    0.80    5.70
  -7   1  11   -7.40    6.50
   7   1 -11  -11.00   17.60
   7  -1  11    5.30   11.00
   7   1 -11   -1.30   14.40
  -7   1  11   12.50   17.70
   7  -1  11    5.70   13.30
   7   1  11   13.60    6.30
  -7  -1  11   -8.60   17.80
   7   1  11    4.10    9.40
   7  -1 -11    6.90   15.30
   7   1  11   15.70   15.60
   7  -1 -11  -11.90   13.00
   8  -1  11   40.60    7.90
   8   1 -11   60.49   12.70
  -8   1  11   30.40   12.80
   8  -1  11   30.10   10.10
   8   1  11   43.40    7.80
   8  -1 -11   30.00   10.20
  -8  -1  11   21.00    9.10
  -8  -1  11   19.70   13.10
   9  -1  11   -0.40    5.40
   9   1 -11   11.50    7.70
   9  -1  11    9.00    6.00
   9   1 -11   10.40    6.50
  -9   1  11   -7.90    8.70
  -9  -1  11    3.70    9.00
   9   1  11    5.80    5.40
   9  -1 -11    2.20    6.40
   9  -1 -11    4.80    6.70
   9   1  11    2.00    3.60
   0  -2 -11   95.29   38.60
   0   2 -11  141.59   29.60
   0  -2  11  159.98   33.60
   0   2  11  111.99   32.50
   0   2  11   88.09   19.00
   1  -2  11   32.00   12.70
  -1  -2 -11   54.79   73.39
  -1   2  11   56.19   11.60
   1   2 -11   54.79   17.90
   1   2  11   52.69   11.90
   1  -2 -11   77.99   25.60
  -1  -2  11   66.89   20.60
  -1   2 -11   44.40   31.20
   1   2  11   48.30   24.80
   2  -2  11  139.79   33.50
  -2   2  11  210.08   48.30
  -2  -2  11  225.18   43.10
  -2  -2  11  201.88   38.50
   2   2  11  170.38   31.70
   2   2  11  117.09   34.30
   2   2  11  213.98   40.00
  -3   2  11  406.66   75.09
   3   2 -11  227.68   48.80
   3   2  11  287.17   41.10
   3  -2 -11  206.78   49.00
   3   2  11  195.18   50.59
  -3  -2  11  353.46   61.69
  -3   2 -11  304.57   83.99
   4   2 -11  124.99   18.20
   4  -2  11  102.49   25.70
  -4   2  11  201.58   43.40
  -4   2  11   88.39   19.20
   4   2  11  114.49   29.30
  -4  -2  11   68.09   37.90
   5  -2  11   14.50   24.40
   5  -2  11   11.00   16.70
   5   2 -11   13.10    6.80
  -5   2  11    6.70   25.50
   5   2 -11   27.00   23.10
  -5   2  11    1.10    8.70
   5   2  11   23.40   21.80
   5  -2 -11   26.80   20.90
   5   2  11   17.20    7.20
   5  -2 -11   32.30   19.70
   5   2  11   19.80    5.90
  -5  -2  11  -16.20   27.20
   6  -2  11   49.20   18.90
   6   2 -11   40.20    9.40
  -6   2  11   44.20   23.70
   6  -2  11    8.20   15.50
  -6   2  11   23.10   10.30
   6   2 -11   42.60   19.90
   6   2  11   48.30    8.20
   6   2  11   61.09   20.10
   6  -2 -11   59.79   19.30
  -6  -2  11   26.20   23.60
   6   2  11   32.90    8.10
   7  -2  11   10.30   10.50
   7  -2  11    1.10   10.60
  -7   2  11    8.10   18.90
   7  -2  11   14.10    6.90
   7   2  11   23.10   13.90
  -7  -2  11    4.30   15.90
   7   2  11   19.90    5.10
   7   2  11    8.20    5.10
   7  -2 -11   13.80   12.60
   7  -2 -11    9.40   12.60
   8   2 -11   -1.20   10.50
   8  -2  11    8.20    6.00
   8  -2  11   -4.90    7.70
   8  -2  11    0.30    7.90
  -8   2  11    0.90   10.10
   8   2 -11    7.30    7.70
  -8  -2  11    0.10    5.30
  -8  -2  11    0.60   10.40
   8   2  11    6.60    5.50
   8   2  11    3.10    3.00
   8  -2 -11    9.00    8.50
   8  -2 -11    3.20    7.20
   8   2  11    7.30    6.70
   0   3  11   84.69   29.00
   0   3 -11   89.19   24.10
   0  -3  11   70.69   20.10
   0  -3 -11   75.19   38.40
   0  -3  11  118.79   23.80
   0   3  11  102.49   16.20
   0   3  11   76.39   15.10
   1   3 -11  190.28   40.50
  -1  -3 -11  166.68   59.89
   1  -3  11  292.87   41.40
  -1   3  11  222.08   36.30
  -1  -3  11  293.47   44.00
   1   3  11  204.08   45.60
   1  -3 -11  206.58   45.90
   1   3  11  246.38   35.90
   2   3 -11   29.80   16.10
  -2   3  11   66.79   12.20
   2   3 -11   52.19    9.40
  -2  -3 -11   32.10   64.69
   2  -3  11   67.49   18.60
   2   3  11   36.70   21.10
   2  -3 -11   15.40   21.00
  -2   3 -11   29.90   38.80
  -2  -3  11   51.39   22.70
   2   3  11   57.39   11.20
   3   3 -11  126.19   26.50
   3   3 -11   62.79   13.30
  -3   3  11   76.59   17.30
   3   3  11  106.59   19.90
   3  -3 -11   84.79   28.60
  -3   3 -11   89.59   58.99
   3   3  11   63.99   24.20
   3   3  11   81.59   16.20
  -3  -3  11  108.39   30.10
   4   3 -11   -6.80    4.50
   4  -3  11   -5.90   13.60
  -4   3  11   -0.10   37.20
   4  -3  11  -11.50   33.40
  -4   3  11   12.80   25.00
  -4   3  11    4.90    8.50
   4   3  11   -9.90   18.30
   4   3  11    3.40    7.50
  -4  -3  11  -31.30   28.90
   4  -3 -11  -11.30   22.50
   4  -3 -11   -4.60   22.60
   4   3  11    5.40    9.70
   5  -3  11  159.88   33.60
   5   3 -11  112.09   20.00
   5   3  11  125.39   29.20
   5   3  11  110.29   20.00
  -5  -3  11  176.18   39.30
   5   3  11  156.98   29.70
   5  -3 -11  169.38   37.80
   5   3  11  101.69   18.70
   6   3 -11    8.80   29.80
   6   3 -11   48.70   16.10
  -6   3  11   36.40   21.80
   6  -3  11    1.30   17.50
   6  -3  11   12.50    8.30
   6   3 -11   -3.90    6.30
   6  -3  11   14.70   13.20
   6  -3 -11    3.10   16.00
   6   3  11    3.20    4.40
   6  -3 -11    2.80   15.90
   6   3  11    0.80    5.70
  -6  -3  11   14.40   22.50
   6   3  11   24.40   18.00
   7  -3  11    1.80    9.30
   7   3 -11   12.30   13.50
   7   3 -11   11.50   10.40
   7  -3  11   -5.80    6.20
  -7   3  11   -3.90   14.20
   7   3 -11   -6.10    5.00
   7  -3  11    6.60   12.20
   7  -3 -11   -4.40   10.30
   7  -3 -11   -0.20   11.10
   7   3  11    5.10    3.70
  -7  -3  11    2.90   16.70
   7   3  11    3.90    3.00
   7   3  11    9.90   10.90
   8   3 -11    6.90   11.10
   8  -3  11   12.70    8.50
  -8   3  11   32.00   12.10
   8  -3  11   -0.10    7.80
   8  -3  11   13.50    7.50
   8   3  11    3.80    2.90
  -8  -3  11    5.10    9.90
   8   3  11   13.20    4.00
   8  -3 -11    6.70    8.30
   8   3  11    4.90    6.10
   8  -3 -11    6.80    6.90
   0   4 -11  321.17   53.69
   0  -4  11  383.06   53.99
   0  -4 -11  228.68   59.69
   0   4  11  250.17   55.79
   0   4  11  330.27   47.40
  -1  -4 -11   27.60   48.30
   1  -4  11   63.69   19.00
   1   4 -11   23.30   16.20
   1  -4 -11   25.30   29.30
   1   4  11   53.29   35.70
   1   4  11   59.89   12.50
  -1   4 -11   12.10   22.90
   1   4  11   46.10   10.20
  -1  -4  11   58.09   24.80
   2  -4  11   54.29   21.00
  -2   4  11   52.89   11.00
   2   4 -11   44.30    8.70
   2   4 -11   26.10   16.30
  -2  -4 -11   39.40   68.69
   2   4  11   45.00    9.00
  -2   4 -11   16.90   35.30
   2  -4 -11    2.90   22.20
   2   4  11   52.69   20.00
  -2  -4  11   79.69   30.00
  -2  -4  11   29.20   20.90
  -3   4  11  131.09   26.00
   3   4 -11  152.18   24.60
  -3   4 -11  208.68   59.29
  -3  -4  11  265.97   46.30
  -3  -4  11  194.98   44.10
   3   4  11  166.18   35.30
   3  -4 -11  173.38   36.70
   3  -4 -11  164.88   33.50
   4   4 -11   60.39   12.10
  -4   4  11  128.09   39.50
  -4   4  11   74.89   15.00
   4   4  11   82.49   22.40
   4  -4 -11   73.29   26.10
  -4  -4  11   90.99   34.00
   4   4  11   89.99   15.80
   4   4  11   96.79   16.90
   4   4  11   52.59   12.30
  -5   4  11   46.10   21.20
   5  -4  11   59.29   26.20
  -5   4  11   13.90   11.30
   5   4 -11   41.40   22.00
   5   4 -11   37.50    8.30
   5  -4  11   13.00   15.30
  -5   4  11   21.40   47.40
   5   4  11   27.70    8.50
   5   4  11   13.40   19.40
   5   4  11   36.30    7.00
   5   4  11   61.29   12.90
  -5  -4  11   33.40   27.30
   5  -4 -11   39.10   21.10
   5  -4 -11   59.09   21.20
   6  -4  11   -4.80    9.60
   6  -4  11   16.20   21.00
   6   4 -11   15.50   18.20
   6  -4  11  -13.60   18.20
   6   4 -11   -5.10    8.80
   6   4 -11   35.50   18.10
  -6   4  11   49.80   27.30
   6  -4 -11   -1.70   13.40
   6   4  11   27.80   11.70
   6   4  11   11.40   22.50
   6  -4 -11    3.30   16.40
   6   4  11   16.20    6.70
  -6  -4  11    2.20   22.40
   7  -4  11   -9.70    8.50
  -7   4  11   27.00   13.30
   7   4 -11   22.70   13.90
   7   4 -11   18.70    8.60
   7   4 -11    2.00    3.80
   7  -4  11   -4.10    7.00
   7  -4  11    6.10   12.10
   7   4  11    9.50    3.90
  -7  -4  11  -18.90   13.30
   7  -4 -11   26.20   11.90
   7   4  11    6.30    2.80
   7  -4 -11    5.40    8.50
   7   4  11   -9.00    9.10
   8   4 -11   -1.10    9.80
  -8   4  11   13.40   10.20
   8   4 -11    4.90    8.40
   8  -4  11  -11.30    9.70
   8  -4  11   18.20    9.00
  -8   4  11    6.50    3.80
   8  -4 -11  -11.00    9.30
  -8  -4  11   -5.50   10.80
   8   4  11    7.30    5.70
   8   4  11   -2.70    2.90
   8   4  11    4.20    2.60
   8  -4 -11    0.70   11.90
   0   5  11  212.48   32.30
   0   5  11  222.28   32.80
   0   5 -11  150.48   39.70
   0  -5  11  222.48   42.10
   0  -5  11  244.68   42.20
  -1  -5 -11  -18.60   50.59
  -1   5  11   79.39   15.00
   1   5 -11   96.69   21.10
  -1   5  11   80.69   15.30
   1  -5  11   77.39   23.20
  -1  -5  11  112.59   31.80
   1  -5 -11   13.90   31.80
   1   5  11   57.59   22.40
   1   5  11  102.09   15.50
  -1  -5  11  102.39   23.80
   1   5  11   74.59   14.70
   2  -5  11   82.99   26.00
   2   5 -11   89.49   17.00
  -2  -5 -11   22.00   69.99
  -2   5  11   91.29   16.80
   2   5 -11   95.09   28.30
  -2   5  11  121.69   18.10
  -2  -5  11  125.99   39.50
   2   5  11   79.09   23.60
   2  -5 -11   48.10   30.90
  -2   5 -11   45.60   35.30
  -2  -5  11   89.59   26.40
   2   5  11  119.79   17.00
   3   5 -11   11.30    5.90
  -3   5  11   15.50   25.00
  -3   5  11   14.80    6.60
  -3   5  11   54.69   24.90
  -3   5  11   17.80    8.50
   3   5  11   13.40   10.60
   3   5  11   19.30    5.70
   3  -5 -11   17.60   26.10
   3   5  11    3.10   16.60
   3   5  11   13.10    6.50
  -3  -5  11    3.40   22.30
  -3   5 -11   -4.50   41.30
  -3  -5  11  -16.90   41.30
   4   5 -11   10.30    5.70
  -4   5  11   13.30    9.70
  -4   5  11    4.30    5.50
  -4   5  11   69.99   24.40
   4  -5  11   -0.10   11.70
  -4   5  11   59.69   43.10
   4   5  11   14.50    6.70
   4   5  11    5.90   17.90
   4   5  11   35.90    9.60
   4   5  11   21.00    4.70
  -4  -5  11   35.70   26.80
  -5   5  11   52.59   23.70
  -5   5  11    8.40    5.60
   5   5 -11    6.10    5.30
  -5   5  11  -24.90   51.09
   5  -5  11   -9.50   12.50
   5   5  11   10.70    3.80
   5   5  11   12.90    8.30
   5   5  11   -4.40   13.80
   5   5  11    5.10   16.70
  -5  -5  11  -22.60   22.80
   5  -5 -11  -28.30   32.20
   6  -5  11   14.10   20.30
  -6   5  11   43.10   15.30
   6  -5  11    9.50    7.70
   6  -5  11    4.80   10.60
   6   5 -11    6.70   14.80
  -6   5  11    7.40    4.30
   6   5  11    7.70    2.70
   6   5  11   20.90   13.30
  -6  -5  11   18.10   16.70
   6  -5 -11  -19.40   11.70
   6   5  11   12.20    5.30
   7   5 -11   22.20    9.40
   7   5 -11    3.30    3.60
   7  -5  11    4.20   15.20
   7   5 -11   37.90   19.70
   7  -5  11   10.50    8.70
   7  -5  11    3.40    9.00
  -7   5  11    3.50    3.40
   7   5  11    1.10    7.60
   7   5  11   14.40    4.00
  -7  -5  11   -0.70   11.10
   0  -6  11   47.20   23.90
   0   6  11   31.30    6.90
   0   6 -11    6.50   17.20
   0  -6 -11   34.50   38.00
   0  -6  11   14.40   24.40
   0   6  11   30.50    7.80
  -1   6  11  113.09   20.50
  -1   6  11  170.18   30.20
   1   6 -11  147.49   29.10
  -1  -6 -11   32.80   42.80
   1   6  11  133.79   20.60
  -1  -6  11  147.99   35.30
   1  -6 -11   43.20   37.90
   1   6  11  119.69   19.60
  -1  -6  11   52.19   34.90
   1   6  11  119.89   19.40
   2  -6  11   15.50   44.00
  -2   6  11  177.98   35.00
  -2   6  11  132.29   21.40
  -2   6  11  126.69   19.40
  -2  -6 -11  -16.00   58.29
   2   6  11  117.99   19.90
   2   6  11  134.59   19.80
  -2  -6  11   90.39   28.40
  -2   6 -11   48.40   32.20
  -2  -6  11  100.29   47.50
   2   6  11  124.99   19.50
  -3   6  11   -0.90    8.40
  -3   6  11   -4.40   26.00
   3   6 -11    0.40    5.70
  -3   6  11   12.00    5.40
   3   6  11   -4.30    4.30
   3   6  11    8.90   16.40
   3   6  11    0.50    4.90
  -3  -6  11    6.00   22.10
  -3   6 -11  -13.30   38.90
  -3  -6  11   -2.90   51.99
   3  -6 -11   15.50   36.30
  -4   6  11  -37.90   37.20
   4   6 -11    1.70    6.00
  -4   6  11    3.30   11.60
  -4   6  11    6.80    5.50
  -4   6 -11    1.80   54.89
   4   6  11   10.10    6.10
  -4  -6  11    4.20   21.60
   4   6  11    4.80   15.70
   4   6  11    1.60    4.50
  -5   6  11   17.60    5.10
   5   6  11   16.00    4.10
   5   6  11    6.20    6.40
   5   6  11   27.10   12.20
  -5  -6  11    2.70   15.30
   5   6  11   19.10    6.50
   6  -6  11   15.10    8.00
  -6   6  11   11.90    4.70
   6   6 -11   12.80    4.40
  -6  -6 -11   19.00   14.90
   6   6  11   22.70    9.70
  -6  -6  11    7.20   11.10
   6   6  11   19.70    3.60
   6   6  11   33.90    7.40
  -7   6  11    9.40    4.10
  -7  -6 -11   22.50   12.30
   7   6  11   33.60    6.30
   7   6  11   11.60    7.80
  -7  -6  11   14.80    9.30
   7   6  11   18.00    3.60
   0   7  11   12.80    6.30
   0   7  11   21.80   18.50
   0  -7 -11   60.09   20.00
   0  -7  11   19.50   26.50
   0  -7 -11   34.70   54.59
   0   7  11   28.70    5.90
   0   7 -11   20.60   24.70
  -1  -7 -11   48.80   60.19
   1   7 -11   85.79   33.50
  -1   7  11   -3.80    5.60
  -1   7  11    7.50    4.40
  -1  -7 -11   15.30   19.80
  -1   7  11  -26.30   19.10
   1  -7  11   -3.50   26.80
  -1   7 -11   20.00   20.30
  -1  -7  11  -28.60   35.30
  -1  -7  11    3.80   19.90
   1   7  11    2.90    4.60
   1  -7 -11   11.80   26.50
   1  -7 -11  -11.10   32.30
   1   7  11    0.30   10.70
   1   7  11    5.70    4.70
  -2   7  11   15.80    8.20
   2  -7  11   53.59   52.99
  -2   7  11   13.60   20.40
  -2   7  11   16.30    5.30
  -2  -7 -11   27.90   66.29
  -2  -7  11   39.70   44.20
   2   7  11   10.80    5.20
   2   7  11   28.10   10.70
  -2   7 -11   -4.60   23.70
   2  -7 -11   29.10   30.40
  -2  -7  11   10.30   20.90
   2   7  11   28.50   11.10
  -3   7  11   -4.70   24.10
  -3   7  11    7.40    9.30
  -3   7  11    7.40    7.30
  -3  -7 -11   34.40   25.40
  -3  -7  11  -66.99   55.39
   3   7  11   20.00    5.40
   3  -7 -11  100.39   68.59
  -3  -7  11    9.50   24.40
   3   7  11    4.40    6.50
  -3   7 -11   26.50   34.00
  -4  -7 -11   25.70   17.80
  -4   7  11   16.40    5.40
  -4  -7  11   12.70   15.30
   4   7  11   23.30    5.60
   4   7  11   22.00    5.70
  -5   7  11   39.00    7.20
   5   7  11   49.50    9.00
  -5  -7  11   25.80   13.30
   5   7  11   39.80    7.30
  -6   7  11    5.90    3.80
  -6  -7 -11   40.50   13.40
   6   7  11   15.50    3.10
  -6  -7  11   14.80    9.20
   6  -7 -11   33.00    9.00
   6   7  11    9.60    5.50
   0   8  11   20.10    4.60
   0  -8 -11   47.20   17.70
   0  -8  11   22.10   30.90
   0  -8 -11   21.30   52.89
   0   8 -11   -5.60   38.70
   0   8  11    6.40    6.50
  -1  -8 -11   27.00   16.30
  -1  -8 -11   -9.10   75.19
   1  -8  11   46.70   38.70
   1  -8 -11  -14.50   32.00
  -1  -8  11   24.20   38.40
  -1   8 -11  -19.80   32.80
  -1  -8  11   46.00   20.70
  -2   8  11   47.70    9.20
  -2   8  11   63.99   11.20
  -2  -8  11   23.60   17.10
   2  -8 -11    4.40   37.40
  -2   8 -11   17.10   23.70
   2   8  11   55.09    9.90
   2   8  11   49.50    9.10
  -3   8  11   -3.10    3.50
   3   8  11   -4.20    4.10
  -3  -8  11  -15.10   13.30
   3   8  11    1.50    3.80
  -4  -8 -11   10.60   11.30
  -4   8  11   14.30    4.10
   4   8  11    8.50    5.10
   4   8  11   10.30    4.60
  -4  -8  11   -0.80   10.80
  -5   8  11    2.00    2.60
  -5  -8 -11    7.40   10.10
   5  -8  11   25.70   11.00
   5   8  11   -4.80    4.40
  -5  -8  11    1.90    7.80
   5   8  11   -4.60    3.50
   0   9  11   14.50    3.70
   0   9  11    2.30    5.60
  -1   9  11   33.20    9.20
  -1   9  11   41.70    6.50
   1   9  11   29.50    6.70
  -2  -9 -11   42.80   14.20
   2   9  11   25.10    6.20
   2   9  11   26.40    5.90
  -3  -9 -11   52.69   14.00
  -3   9  11   36.40    6.00
   3   9  11   26.90    6.40
  -3  -9  11   64.79   22.90
  -4  -9 -11   17.40   17.90
  -4  -9  11   26.10   14.50
   0  10  11   92.59   12.70
   0  10  11   65.19   14.00
  -1  10  11   10.60    3.50
   1  10  11    6.60    3.70
   1  10  11   10.00    4.50
   0   0  12   -8.20   27.00
   0   0 -12   23.90   25.50
   0   0  12   40.70   14.90
  -1   0  12   12.10    8.10
  -1   0 -12   25.50   33.60
  -1   0  12   64.29   16.70
  -1   0  12   28.00   21.30
   1   0  12   31.20    8.80
   1   0  12   59.29   16.00
   1   0 -12   -4.20   18.60
   2   0  12  186.78   39.20
   2   0 -12  106.89   28.30
  -2   0  12  185.48   40.60
  -2   0 -12   96.59   51.89
   2   0  12  133.39   24.20
  -3   0  12  105.09   30.50
   3   0 -12   49.90   23.40
  -3   0  12   52.89   30.10
   3   0  12   58.19   37.80
   4   0  12   19.50   30.20
  -4   0  12   44.60   31.30
  -4   0  12   91.39   39.30
   5   0  12   30.80   25.30
  -5   0  12   70.89   27.20
   5   0 -12   51.39   22.90
   5   0  12   23.40    7.30
   6   0 -12    9.40   31.50
   6   0  12   -2.30   18.20
  -6   0  12   20.30   22.20
   6   0  12   -2.90    5.10
  -6   0  12    1.50    7.10
   6   0  12    4.80   10.90
   6   0 -12   25.20   14.30
   7   0 -12   23.50    9.10
   7   0  12    4.60    4.20
  -7   0  12    6.00    5.20
  -7   0  12   23.10   14.50
   7   0  12    9.90   10.60
   7   0 -12    3.90   13.40
   8   0  12    4.20    5.40
   8   0 -12   -9.90   22.80
   8   0 -12    1.30    6.50
  -8   0  12    0.10   10.30
   8   0  12    2.20    3.10
   0   1 -12   18.40   22.30
   0  -1 -12  -11.80   25.10
   0  -1  12   32.60   13.90
   0   1  12   10.60    7.10
   0  -1  12    9.80    7.00
   0  -1  12   18.40   21.80
   0   1  12   38.30   14.80
  -1   1  12   -1.00    6.50
  -1  -1 -12   36.00   35.80
  -1   1  12    0.10   20.30
  -1   1  12   33.60   16.90
   1  -1  12   13.00   14.30
   1   1 -12   -5.00   18.00
   1  -1  12    2.00    8.20
  -1  -1  12   11.20   17.60
  -1  -1  12   19.90   18.40
   1   1  12    4.90    6.30
  -1   1 -12   -7.80   28.90
   1   1  12   43.60   29.40
   1   1  12   24.90   15.50
   1  -1 -12    9.30   21.30
  -2   1  12   41.70   34.80
  -2   1  12   42.10   21.90
   2   1 -12  -18.50   15.30
   2  -1  12   37.80   17.80
  -2  -1 -12  -41.10   48.20
   2  -1 -12    0.50   19.40
   2   1  12   33.40   12.10
  -2  -1  12   58.39   21.80
   2   1  12   12.60    7.90
  -2  -1  12   11.60   30.60
  -2   1 -12   29.80   41.50
   2   1  12    5.60   26.90
   3   1 -12   21.30   24.00
   3  -1  12   97.19   60.89
  -3   1  12   18.40   10.80
  -3   1  12   71.89   29.00
  -3   1  12   69.79   29.40
   3  -1 -12   19.30   24.80
  -3  -1  12   70.09   27.90
   3   1  12   33.30   29.20
  -3  -1  12   14.70   26.60
   3   1  12   42.90   11.00
  -4   1  12   54.89   37.60
  -4   1  12    7.50    9.00
   4  -1  12    2.10   31.70
  -4   1  12   37.20   29.60
  -4  -1  12    9.80   28.00
   4   1  12   35.40   25.70
  -4  -1  12   -5.50   31.30
   4   1  12   13.10    7.30
  -5   1  12    7.20    8.20
   5  -1  12   19.90    6.90
   5  -1  12    1.40   18.70
  -5   1  12   17.20   25.00
   5  -1  12   16.80   26.20
   5   1  12   31.80    7.30
   5  -1 -12   33.30   16.20
   5   1  12   14.90    6.70
  -5  -1  12   30.10   25.60
   5  -1 -12   59.69   21.60
   5   1  12    2.10   24.80
  -6   1  12   38.40   22.60
  -6   1  12    0.60    7.90
   6  -1  12    2.80   24.40
   6  -1  12   23.90    6.60
   6  -1  12   -5.80   17.20
   6   1 -12   15.50   32.50
  -6  -1  12    9.30   20.80
   6   1  12   18.10    6.00
   6   1  12   33.90   20.40
   6  -1 -12   22.80   20.50
   6   1  12   14.50    7.20
   7  -1  12    4.90   10.10
   7  -1  12    1.00    4.30
  -7   1  12    2.50   14.00
   7   1 -12    1.10   13.50
  -7   1  12    5.10    5.60
   7   1 -12   18.70   10.10
   7  -1 -12    3.20   12.70
   7   1  12    6.00   10.00
  -7  -1  12   -4.50   14.80
  -7  -1  12    2.90    5.30
   7   1  12    3.20    3.60
   7  -1 -12   -3.90    8.30
  -8   1  12    3.30    9.50
   8   1 -12    1.50    7.40
   8  -1  12    0.30    6.00
   8  -1  12    0.50    4.70
   8   1 -12    8.40   11.90
  -8  -1  12   -9.60    7.40
   8   1  12    8.40    3.10
   8   1  12    1.90    5.20
   8  -1 -12   -4.70    6.40
  -8  -1  12    2.20   10.10
   8  -1 -12   17.50    9.80
   0   2  12  280.87   62.29
   0   2 -12  371.76   58.69
   0   2  12  336.97   49.70
   0  -2 -12  311.27   63.19
   1  -2  12   30.40   10.80
   1  -2  12   59.19   15.70
  -1  -2 -12    1.70   40.00
  -1   2  12   76.79   23.70
   1   2 -12   14.00   16.30
  -1   2  12   31.10   12.40
  -1  -2  12   41.00   18.90
  -1  -2  12   38.70   18.50
   1  -2 -12   -6.90   21.30
   1   2  12   18.60    7.20
  -1   2 -12   45.10   31.00
   1   2  12   26.80   24.10
  -2   2  12  261.87   49.40
  -2  -2 -12  201.78   66.09
   2  -2  12  192.88   38.10
  -2  -2  12  172.88   41.30
   2  -2 -12  172.58   38.30
  -2  -2  12  230.38   44.10
  -2   2 -12   91.39   48.00
  -3   2  12  136.89   33.50
   3   2 -12   51.69   28.50
  -3   2  12  123.79   31.40
  -3  -2  12   72.89   27.70
  -3   2 -12   44.60   53.59
  -3  -2  12    6.80   28.60
   3  -2 -12   19.80   27.90
   3   2  12   18.70   24.00
   3   2  12   59.49   12.60
   3   2  12   79.69   14.30
  -4   2  12   -0.20    7.40
  -4   2  12  -24.30   30.70
   4  -2  12   20.40   32.70
  -4   2  12    0.60   25.10
   4  -2  12    8.40   17.10
  -4  -2  12   14.80   27.80
   4   2  12   11.80   23.50
   4   2  12   12.80    7.90
   4   2  12  -24.40   13.70
  -4  -2  12  -39.80   36.60
   4  -2 -12   24.20   20.50
  -5   2  12   91.29   25.20
   5  -2  12   58.69   12.50
   5  -2  12  100.89   30.00
   5   2  12   68.89   13.90
   5  -2 -12   92.39   24.00
  -5  -2  12   68.29   28.10
   5   2  12   61.69   13.10
   5   2  12   67.69   25.00
  -6   2  12   37.40   23.50
   6  -2  12    9.20    7.40
   6  -2  12   -2.40   16.50
   6  -2  12   22.10   24.20
   6   2 -12   42.50   19.90
   6  -2 -12   67.09   27.80
   6   2  12   24.60    7.80
   6   2  12   21.10    6.70
  -6  -2  12   28.80   27.80
   6   2  12    1.60   19.20
   6  -2 -12   14.10   20.50
   7  -2  12    7.60    5.40
   7   2 -12   28.20   10.60
   7   2 -12    9.50   15.40
   7  -2  12   -7.90   10.60
  -7   2  12   21.40   13.00
  -7  -2  12    8.30   13.10
   7   2  12    0.50    9.20
   7   2  12    3.00    3.80
   7  -2 -12    3.10    9.70
   7  -2 -12   10.70   11.00
   7   2  12   15.60    4.50
   8  -2  12    2.10    7.10
  -8   2  12   15.50   10.10
   8  -2  12    3.50    5.80
   8   2 -12   32.70   12.40
   8   2 -12   26.30    7.40
   8   2  12    8.90    6.60
   8  -2 -12   27.90    8.50
   8   2  12   15.50    5.80
  -8  -2  12   -0.40    5.30
  -8  -2  12   11.00   10.50
   8   2  12   11.10    3.60
   8  -2 -12   12.20    9.10
   0   3  12   27.20   14.40
   0  -3  12    1.00   16.10
   0  -3 -12    5.10   29.70
   0   3 -12    9.90   20.20
   0   3  12  -12.00   35.60
   0   3  12   -2.30    5.90
   0  -3  12   23.70   18.50
   0   3  12    6.10    6.50
  -1   3  12  123.89   21.60
   1  -3  12  166.38   30.30
  -1  -3 -12   18.60   43.50
  -1  -3  12  208.38   35.80
  -1   3 -12   77.39   31.90
   1  -3 -12  136.89   33.80
   1   3  12  134.69   29.60
  -1  -3  12  148.09   31.40
   1   3  12  126.49   20.70
  -2   3  12  217.28   36.80
   2   3 -12  235.08   44.60
   2  -3  12  287.77   44.60
   2  -3 -12  192.38   47.20
   2   3  12  210.88   44.50
   2   3  12  251.57   35.80
  -3   3  12  162.48   32.00
   3   3  12  197.88   42.30
  -3   3 -12  108.99   60.29
   3   3  12  222.68   31.60
   3  -3 -12  210.28   41.40
  -3  -3  12  300.17   56.79
  -3  -3  12  258.57   48.70
  -4   3  12  126.89   39.30
   4   3 -12   41.10    8.90
   4   3  12   25.50   20.80
  -4  -3  12   51.19   28.70
   4  -3 -12   61.39   20.20
  -4  -3  12   10.30   40.70
   4   3  12   53.29   11.20
  -5   3  12   31.10   21.20
   5   3 -12   -1.50    5.50
  -5   3  12   -0.40   40.90
   5  -3  12    6.70   13.90
   5  -3  12    4.20   25.20
  -5   3  12   12.20    8.30
   5   3  12    1.90    4.40
  -5  -3  12  -13.70   25.20
   5   3  12   19.20   20.50
   5  -3 -12   13.20   15.80
   5  -3 -12   28.60   20.60
   5   3  12    4.80    6.30
   5   3  12   -4.60   19.00
  -6   3  12   66.19   25.80
   6  -3  12    5.20   12.80
  -6   3  12    7.70    7.90
   6  -3  12   41.80   19.60
   6  -3  12   28.40    9.70
   6   3 -12   68.49   22.50
   6   3  12   22.50    7.50
  -6  -3  12   20.50   21.50
   6   3  12   23.30   24.80
   6  -3 -12   19.50   12.40
   6   3  12   28.00    5.60
   6  -3 -12   -4.80   14.70
   7   3 -12    7.60    8.70
   7   3 -12    0.70   15.80
   7  -3  12   -9.00   11.20
  -7   3  12    8.80   10.00
   7  -3  12    3.50    5.20
   7   3  12   15.40    7.90
   7   3  12   -0.10    3.00
   7  -3 -12   -4.70    8.80
   7   3  12    1.10    2.90
  -7  -3  12    5.70   12.20
   7  -3 -12    9.10   10.90
   8  -3  12   18.00    6.40
   8   3 -12   29.80    9.30
  -8   3  12   22.20    9.60
   8   3  12   12.80    3.80
  -8  -3  12    3.50    4.50
   8  -3 -12    4.20    8.90
  -8  -3  12    3.50    9.10
   8   3  12    3.30    5.80
   8  -3 -12    3.50    7.90
   8   3  12   15.10    4.20
   0  -4  12  672.93   99.19
   0   4  12  603.94   93.49
   0   4  12  661.23   93.89
   0  -4  12  759.22   99.89
   0   4 -12  523.75   98.19
  -1  -4 -12  365.46   92.39
   1  -4  12  403.56   73.39
  -1   4  12  539.25   69.79
   1   4  12  535.75   69.39
   1  -4 -12  338.97   78.69
  -1  -4  12  539.05   74.29
   1   4  12  358.26   74.09
  -2   4  12  176.48   28.50
  -2  -4 -12   10.20   69.59
   2  -4  12  145.09   34.70
  -2  -4  12  249.68   48.40
   2   4  12  193.88   27.40
   2   4  12  168.18   34.30
  -2  -4  12  173.68   38.50
  -2   4 -12  126.59   43.60
  -3   4  12   77.99   17.00
  -3  -4  12  131.49   40.20
  -3  -4  12   80.89   25.80
   3  -4 -12   54.79   33.80
   3   4  12   89.19   24.30
   3   4  12   88.19   16.00
  -3   4 -12   63.59   45.80
  -4   4  12   25.00    8.60
   4   4 -12   15.10    6.00
  -4   4  12   15.90   38.40
  -4   4  12   74.79   25.90
   4  -4 -12   -7.00   19.80
   4   4  12   13.10   17.00
  -4  -4  12  -23.70   50.39
   4   4  12   34.30    9.50
  -4  -4  12   -8.90   22.20
   4   4  12   13.50    4.80
  -5   4  12   58.79   20.90
   5   4 -12   32.60    8.20
  -5   4  12   64.69   16.80
  -5   4  12  -30.00   46.80
  -5  -4  12   40.70   29.00
   5   4  12   23.70   10.00
   5  -4 -12   47.10   27.50
   5   4  12   37.90   20.20
   6  -4  12    0.20   11.10
   6  -4  12   -6.40   19.90
   6  -4  12   -0.10    6.50
  -6  -4  12   -6.70   15.00
   6   4  12    6.30    2.80
   6   4  12   -0.10   11.70
   6  -4 -12   14.60   12.70
   6   4  12   14.60    5.20
   6  -4 -12    7.60   13.40
   7  -4  12  -14.50   13.90
   7   4 -12    3.10    8.50
   7  -4  12   -7.90    6.40
  -7   4  12   12.20   10.90
  -7   4  12   -2.60    3.00
   7  -4 -12  -21.70   19.00
  -7  -4  12    9.20   10.90
   7   4  12    0.80    2.20
   7   4  12   22.90    9.10
   7   4  12    0.40    3.00
   0   5  12  108.29   17.20
   0   5  12  113.29   17.90
   0  -5  12   97.69   27.40
   0  -5 -12   19.20   36.20
   0   5 -12   82.39   25.90
   1  -5  12   -2.00   19.20
  -1   5  12   32.60    8.10
   1   5 -12   26.90   20.10
  -1   5  12   34.10    7.50
  -1   5  12   38.80   16.70
  -1  -5 -12    5.30   45.00
   1   5  12   34.20    7.40
  -1   5 -12   -3.90   22.90
   1   5  12    6.00   16.40
   1  -5 -12   -8.60   27.30
  -1  -5  12   21.60   24.80
  -1  -5  12   13.50   17.20
   1   5  12   46.60    7.90
  -2   5  12    8.00    6.00
  -2   5  12   14.30   19.20
   2  -5  12   39.10   25.80
  -2   5  12    9.40    6.90
  -2  -5 -12   99.99   64.79
   2   5 -12   -2.80   32.10
   2   5  12   33.10   17.90
   2   5  12   18.10    5.90
  -2   5 -12   -0.80   25.50
  -2  -5  12   -7.60   28.90
   2  -5 -12   19.40   27.90
  -2  -5  12   17.60   18.00
  -3   5  12   38.90   27.80
  -3   5  12   16.40    7.60
  -3   5  12    3.20    5.50
   3   5  12   34.40   11.50
  -3  -5  12    0.60   17.90
  -3  -5  12   31.00   37.80
   3   5  12    7.40    4.50
  -3   5 -12   -0.90   43.60
   3   5  12   30.50   17.40
   3   5  12   11.80    5.50
   3  -5 -12   27.50   37.80
  -4   5  12   10.80    5.90
  -4   5  12    5.50   12.20
  -4   5  12  -47.50   36.80
  -4   5  12   53.09   22.10
   4   5 -12   -5.30    4.80
   4   5  12    0.10   16.40
   4   5  12   20.60   11.20
  -4  -5  12    3.10   23.30
   4   5  12    2.20    3.50
   4   5  12   -0.10    6.70
   5   5 -12   17.80    6.40
  -5   5  12   23.20    6.00
  -5   5  12   48.10   10.30
   5   5  12   -0.90   13.20
   5   5  12   30.60    7.60
  -5  -5  12   26.20   18.50
   5   5  12   32.10    5.50
   5   5  12   23.70    8.60
   6  -5  12   26.50    7.00
  -6   5  12    6.10    3.20
   6   5  12   34.60   11.00
   6   5  12   13.30    2.80
  -6  -5  12   -8.10   13.20
   6   5  12    2.70    4.10
   7  -5  12   16.10    7.10
  -7   5  12    3.90    3.00
  -7  -5 -12   33.80   14.20
   7   5  12   11.10    2.50
  -7  -5  12    0.60    8.90
   7   5  12   16.40    7.40
   7   5  12   14.00    3.70
   0   6  12  -16.00   14.20
   0   6 -12    2.40   25.20
   0   6  12   10.50    5.70
   0  -6 -12  -19.40   45.40
   0  -6  12  -19.40   23.80
   0  -6 -12   30.50   17.30
  -1   6  12   14.60    6.50
   1  -6  12  -16.00   23.20
   1   6 -12  -24.50   31.00
  -1   6  12   27.80    6.20
  -1  -6 -12   -3.20   56.39
  -1   6  12   15.70   18.90
   1  -6 -12   49.90   24.70
  -1  -6  12   22.90   19.10
   1   6  12   23.80    6.40
  -1   6 -12   -8.60   22.00
   1   6  12   12.70    6.80
   1  -6 -12   34.50   33.80
   1   6  12   23.50    6.10
  -1  -6  12  -27.10   28.60
  -2   6  12    0.40    4.80
  -2   6  12    4.50   19.90
  -2  -6 -12  -11.10   64.49
  -2   6  12    6.30    6.50
  -2  -6  12    2.90   38.20
  -2   6 -12   19.70   23.30
   2   6  12    0.80    4.30
  -2  -6  12   -8.10   17.80
   2  -6 -12   20.10   28.60
   2   6  12   -5.00    4.80
  -3   6  12   11.40    5.10
  -3   6  12    6.40   26.80
  -3   6  12   -6.90    8.90
  -3  -6  12   -0.20   21.40
  -3   6 -12   19.70   35.80
   3   6  12   17.10    5.40
   3  -6 -12   73.89   65.49
   3   6  12    2.40    4.70
   3   6  12   13.00   14.90
  -3  -6  12  -83.89   44.60
  -4   6  12   28.40    6.90
  -4   6  12   58.59   38.50
  -4   6  12   40.50    9.30
  -4  -6  12   39.90   18.60
   4   6  12   47.20    8.90
   4   6  12   23.80    5.90
   4   6  12   32.70    7.00
   4   6  12   17.30   13.30
   5   6 -12   33.30   10.10
  -5  -6 -12   41.10   18.60
  -5   6  12    4.40    3.30
   5   6  12   14.30    6.20
   5   6  12    7.40   10.50
  -5  -6  12    7.10   11.30
   6   6 -12   25.70   10.50
  -6   6  12    4.10    3.00
   6  -6  12    7.40    6.70
  -6  -6 -12   28.30   15.00
   6   6  12    5.40    7.70
  -6  -6  12   -1.00    8.50
   6   6  12    6.90    4.80
   6   6  12    1.10    1.70
   0   7  12    9.10    7.30
   0  -7 -12   16.40   50.89
   0  -7 -12   19.90   25.10
   0   7 -12    3.70   36.00
   0  -7  12   -6.40   26.30
  -1   7  12  -28.00   22.20
  -1  -7 -12   27.10   59.69
  -1  -7 -12    9.20   18.80
   1   7 -12   98.79   56.69
   1  -7  12    5.80   26.10
   1   7  12    4.90    6.40
   1   7  12    0.30    5.70
  -1   7 -12    1.00   23.40
   1  -7 -12   12.60   32.40
   1   7  12    8.80    4.10
  -1  -7  12  -28.90   30.30
  -1  -7  12   19.20   21.70
  -2   7  12  -42.40   24.30
  -2  -7 -12   38.80   21.00
  -2   7  12   14.40    6.20
  -2   7  12   19.60    8.10
  -2   7 -12   16.60   18.00
  -2  -7  12   28.40   17.50
   2   7  12    5.60    5.00
   2  -7 -12   20.00   32.30
   2   7  12   10.20    6.40
  -2  -7  12    6.30   39.60
   2   7  12   26.90    5.00
  -3   7  12    6.60    4.10
  -3  -7 -12   33.00   14.70
  -3   7  12   23.40    7.70
   3   7  12   13.10    4.10
  -3  -7  12   -5.70   14.20
  -4  -7 -12   13.70   12.10
  -4   7  12    4.60    3.40
   4   7  12    4.80    4.30
   4   7  12    6.40    3.10
  -4  -7  12   -1.60   11.80
   5  -7  12   10.50    5.80
  -5  -7 -12   10.10   12.60
  -5   7  12    1.40    2.90
   5   7  12    2.90    4.40
   5   7  12    2.70    2.50
  -5  -7  12   -5.20   10.30
  -6  -7 -12   19.50   10.80
  -6  -7  12   17.40    8.80
  -1   8  12    9.50    5.70
  -1   8  12   15.20    4.00
  -1  -8 -12    0.40   13.30
   1   8  12   10.40    4.80
   1   8  12   14.10    3.80
  -2   8  12    7.10    4.00
  -2  -8 -12    7.80   11.70
  -2   8  12   14.60    7.40
  -2  -8  12   51.09   39.00
   2   8  12   16.50    5.40
   2   8  12   10.70    4.30
  -3  -8 -12    8.90   11.00
  -3   8  12    2.90    3.00
  -3  -8  12   25.00   15.20
   3   8  12   -1.40    4.80
   3   8  12   10.10    4.00
  -4  -8 -12    6.10   11.60
  -4   8  12    1.20    2.40
   4   8  12   10.80    3.70
   4   8  12    7.30    3.70
  -4  -8  12   -1.80   12.30
   0   9  12   20.10    6.30
   0   9  12   32.00    5.50
  -1   9  12   41.10    9.10
  -1   9  12   24.00    5.60
   1   9  12   33.20    6.50
   1   9  12   29.00    6.30
  -2  -9 -12   45.40   17.20
  -2   9  12   32.10    5.90
   2   9  12   18.60    5.60
  -3  -9 -12   34.30   16.00
  -3   9  12   12.00    3.70
   3   9  12   11.40    4.10
   0   0  13    7.30   16.30
   0   0 -13   -0.90   25.10
   0   0  13    5.60    6.40
  -1   0 -13    5.50   32.40
   1   0  13   41.90    9.20
  -1   0  13   75.59   19.50
   1   0 -13   26.00   21.80
  -1   0  13   31.90    8.90
   2   0  13   -0.90    9.00
  -2   0  13   15.90   24.80
   2   0 -13    8.20   20.00
  -2   0 -13   10.70   45.20
  -2   0  13    2.80    7.90
  -2   0  13   35.20   21.70
   3   0 -13  297.97   63.89
  -3   0  13  326.07   54.79
   3   0  13  219.28   38.20
  -4   0  13   -5.20   45.90
   4   0  13   63.19   30.30
   4   0  13   48.70    9.20
  -4   0  13   24.50   10.90
  -5   0  13    6.50    7.80
   5   0  13   22.50    8.30
   5   0  13   20.30   25.20
  -5   0  13   39.50   23.30
   6   0  13   53.19   11.50
   6   0  13   52.29   18.10
  -6   0  13   44.00   21.00
  -7   0  13    7.60   12.00
  -7   0  13   -0.20    4.90
   7   0 -13   12.50    7.20
   7   0  13    0.00    3.10
   7   0  13    0.40    8.20
  -8   0  13    2.00    9.50
   8   0  13    5.60    3.90
   8   0 -13    7.70    6.20
   8   0  13    0.20    5.80
   0   1  13   30.30   16.40
   0   1 -13    5.30   23.90
   0  -1 -13    1.40   27.60
   0  -1  13   22.50   15.10
   0   1  13    2.30    5.90
   0  -1  13    3.30    6.70
  -1  -1 -13   66.09   40.10
   1   1 -13   26.90   20.70
  -1   1  13   41.90   10.30
   1  -1  13   60.59   11.70
   1   1  13   72.09   12.70
   1  -1 -13   31.60   24.40
  -1  -1  13   35.70    9.80
  -1  -1  13   49.80   18.60
  -1   1 -13   68.29   31.60
  -2  -1 -13   76.29   52.29
  -2   1  13   14.90   22.30
  -2   1  13   11.30    8.40
  -2   1  13   56.59   23.00
   2   1 -13   -4.60   19.20
   2  -1  13   50.69   14.40
  -2  -1  13   77.89   30.10
   2   1  13   14.10   10.90
  -2  -1  13   14.60   20.60
  -2   1 -13   35.70   41.10
   2   1  13   24.80   29.30
   2  -1 -13   17.50   22.20
   2   1  13   10.10    7.60
   3   1 -13  119.29   39.30
  -3   1  13  126.29   33.40
   3  -1 -13  188.58   41.40
   3   1  13  121.19   24.00
   3   1  13  135.39   36.10
  -3   1 -13   73.79   56.09
   3   1  13   87.29   20.80
  -3  -1  13   98.79   30.60
   4  -1  13   45.40    9.60
  -4   1  13   24.40   10.40
  -4   1  13   74.49   29.00
   4  -1  13    9.20   29.80
  -4  -1  13   28.60   24.80
   4   1  13   51.69   10.40
   4   1  13   75.69   28.40
  -4  -1  13   40.90   60.79
  -5   1  13   17.40   20.50
  -5   1  13    6.70    7.70
   5  -1  13    8.00   23.10
   5  -1  13   31.70    9.70
   5  -1  13    7.10    5.30
  -5  -1  13   -5.10   21.10
   5  -1 -13   31.50   13.40
   5   1  13   10.60    6.20
   5   1  13   10.10   21.30
   5   1  13   18.50    6.00
   6  -1  13   -7.10    3.70
   6   1 -13   11.00   11.10
   6  -1  13  -23.60   15.60
  -6   1  13    2.50    5.80
   6  -1  13   -2.60    7.30
  -6   1  13   14.20   15.20
  -6  -1  13   19.40   17.90
   6  -1 -13   -2.50   10.70
   6   1  13  -12.20   15.00
   6   1  13    9.10    4.70
   6   1  13   -1.50    4.50
  -6  -1  13    2.50    6.30
   6  -1 -13   42.90   28.10
  -7   1  13    4.40   11.90
   7  -1  13   10.60    4.50
   7   1 -13   25.20    8.60
  -7   1  13    6.10    7.00
   7  -1  13    7.50    8.90
   7  -1 -13   15.00    6.90
  -7  -1  13   21.30   12.90
   7   1  13   14.30    9.10
  -7  -1  13    4.30    5.70
   7   1  13   15.60    4.10
   7  -1 -13   45.30   23.30
   8   1 -13   29.00    8.30
   8  -1  13   10.00    6.80
  -8  -1  13   17.20   10.30
   8   1  13   15.40    4.50
   8   1  13   12.50    6.20
   0   2  13   14.10    6.60
   0  -2 -13   21.80   29.10
   0  -2  13   19.10    7.80
   0   2 -13   19.60   22.00
  -1   2  13   16.70   20.50
  -1  -2 -13   36.40   39.90
  -1   2  13   15.00   31.00
   1  -2  13   -5.10    9.50
   1  -2  13  -18.10   15.70
   1   2 -13   11.00   17.70
  -1   2  13    3.90    6.70
   1   2  13   31.00   17.40
   1   2  13    1.90    5.40
  -1   2 -13   20.40   26.60
  -1  -2  13  -23.90   16.30
   1   2  13    5.10   25.70
  -1  -2  13   -7.70   17.40
   1  -2 -13   -4.80   23.50
  -2  -2 -13  104.89   61.89
   2   2 -13  206.08   38.40
   2  -2  13  204.68   44.60
  -2   2  13  165.28   30.30
  -2  -2  13  279.37   44.10
   2   2  13  194.98   28.90
  -2   2 -13   78.89   46.20
   2   2  13  129.99   36.90
  -2  -2  13  247.58   41.20
  -3   2  13    4.90    8.80
  -3   2  13   43.40   28.70
   3   2 -13  163.88  119.99
  -3   2  13   75.19   28.90
   3  -2 -13   72.09   40.60
   3   2  13    0.70   26.70
  -3   2 -13    1.90   47.10
  -3  -2  13   14.00   23.50
   3   2  13   25.50    9.20
  -3  -2  13  -17.50   26.80
   3   2  13   21.50    9.60
   4  -2  13    2.70   39.00
  -4   2  13  -11.60   38.10
  -4   2  13   36.00   25.20
  -4   2  13   15.80    7.80
   4  -2 -13   22.50   17.20
   4   2  13   11.30   23.50
  -4  -2  13   17.30   37.80
   4   2  13   -0.70    7.20
  -4  -2  13   31.80   25.90
  -5   2  13   59.69   23.30
  -5   2  13    2.60   42.90
   5  -2  13    7.20   28.30
  -5  -2  13   47.90   27.30
   5   2  13   41.00   10.00
   5   2  13   41.10    8.50
   5   2  13   49.40   25.10
   5  -2 -13   68.19   20.10
  -6   2  13   22.00   14.60
   6  -2  13   32.50   16.50
  -6   2  13   16.10    6.60
   6  -2 -13   37.80   20.10
  -6  -2  13   17.20   18.50
   6   2  13   34.40    5.90
   6  -2 -13   32.60   11.50
   6   2  13   13.80   14.90
   6   2  13   24.30    6.30
   7  -2  13    3.50    4.60
   7  -2  13    1.80    9.60
  -7   2  13   32.50   11.90
   7  -2 -13    8.90    7.50
  -7  -2  13   29.40   13.50
   7   2  13    8.80    7.80
   7  -2 -13   38.90   22.00
  -7  -2  13   10.20    4.80
   8  -2  13   -2.60    3.90
  -8   2  13    8.70    9.10
   8  -2  13   11.00    4.70
  -8  -2  13    9.90    9.50
   8   2  13    4.50    2.60
   8   2  13   -0.70    5.00
   0   3  13  362.66   55.29
   0  -3  13  423.26   60.89
   0   3 -13  335.37   62.59
  -1   3  13   34.90    8.20
  -1  -3 -13   11.70   41.70
  -1   3  13   22.30    7.20
   1  -3  13   26.10   17.50
   1   3 -13   24.50   20.20
   1   3  13   21.00    6.60
  -1  -3  13   55.49   19.10
   1   3  13   21.70   22.90
  -1   3 -13   23.20   25.70
   1  -3 -13   21.10   25.40
  -1  -3  13   26.70   18.20
  -2   3  13   25.50   22.30
   2   3 -13   37.00   26.80
  -2   3  13   11.20   21.70
   2  -3  13   12.20   28.40
  -2   3  13   11.50    7.20
  -2  -3 -13   61.49   60.79
   2   3  13   -9.40   19.70
   2   3  13   15.50    6.20
  -2  -3  13   21.80   18.80
  -2   3 -13    0.60   30.50
  -2  -3  13   -5.10   21.80
   2  -3 -13   23.10   26.20
  -3   3  13   44.50   11.10
   3   3  13   67.09   13.00
  -3  -3  13   40.10   22.00
   3   3  13   43.40   12.50
  -3   3 -13   32.70   48.60
   3  -3 -13   31.90   49.40
   3   3  13   55.79   23.10
  -3  -3  13   44.70   34.60
  -4   3  13   74.19   41.10
  -4   3  13   22.90    8.50
   4  -3 -13   23.90   16.40
   4   3  13   40.40    9.30
  -4  -3  13   41.00   23.90
  -4  -3  13  -61.99   42.10
   4   3  13   41.00   24.10
   4   3  13   28.20    6.00
   5  -3  13    0.60    7.40
  -5   3  13   43.60   22.10
  -5   3  13    4.50    6.80
   5  -3  13    0.00   29.00
  -5   3  13  -83.09   42.50
   5   3  13   15.30   29.10
  -5  -3  13   39.50   30.30
   5  -3 -13   26.30   11.90
   5   3  13    8.90    7.60
   5   3  13   16.30    6.30
   6  -3  13    3.20   18.10
   6  -3  13   18.50    5.90
  -6   3  13   16.60    7.00
  -6   3  13   40.10   13.00
   6  -3 -13   30.30   15.60
   6  -3 -13   31.80   10.80
   6   3  13   31.10   12.30
   6   3  13   13.40    5.20
   6   3  13   25.20    5.20
  -6  -3  13   38.50   16.00
   7  -3  13   27.30   14.80
   7  -3  13   28.50    6.80
  -7   3  13   28.70   10.10
   7  -3 -13   38.00   12.30
   7   3  13   25.70    5.50
   7   3  13   33.00    5.80
   7   3  13   14.40    8.60
  -7  -3  13   35.30   12.60
   0   4  13   11.10   15.40
   0  -4  13   17.90   18.50
   0   4  13    6.20    5.30
   0   4  13    1.70    5.60
   0   4 -13   20.10   21.10
   0  -4 -13  -13.20   29.40
   1  -4  13   18.40   19.20
  -1   4  13   39.90    8.70
   1   4 -13   86.59   26.00
  -1   4  13   52.39   11.30
  -1  -4 -13   15.80   38.60
  -1  -4  13   61.19   19.20
   1   4  13   48.50   10.60
  -1  -4  13   41.20   21.50
  -1   4 -13   32.90   25.30
   1  -4 -13   33.00   28.30
   1   4  13   46.80   22.20
  -2   4  13   26.50   21.80
   2   4 -13   81.09   45.20
  -2   4  13   46.20    8.80
  -2   4  13   40.70    9.50
  -2  -4 -13   -7.80   59.69
  -2  -4  13   35.10   33.90
  -2   4 -13   23.10   32.10
   2   4  13   52.19   10.40
   2   4  13   32.80   21.20
   2  -4 -13    8.00   29.10
  -2  -4  13   21.30   17.50
  -3   4  13   43.60    9.90
  -3   4  13   66.19   27.00
  -3  -4  13   34.50   21.30
  -3   4 -13   40.30   38.50
   3  -4 -13  122.59   53.39
  -3  -4  13   39.10   35.10
   3   4  13   41.50   21.90
   3   4  13   30.80   11.40
  -4   4  13    4.10    8.80
  -4   4  13   35.80   21.30
  -4   4  13   -7.30   36.10
   4   4  13    7.80   10.70
  -4  -4  13    3.80   44.90
   4   4  13    5.50   20.10
   4   4  13   -1.10    3.60
  -4  -4  13  -12.00   20.70
   5  -4  13   -3.50    5.10
  -5   4  13    8.60    6.10
  -5  -4  13   -7.80   21.20
   5   4  13   17.30    8.90
   5   4  13    7.10    3.10
   5   4  13    7.10   15.20
   5   4  13   15.20    6.40
  -6   4  13   28.20   12.30
  -6  -4  13   23.90   12.30
   6   4  13    4.70   10.70
   7  -4  13   11.50    6.70
  -7   4  13   13.20    3.50
   7   4  13   10.70    6.40
  -7  -4  13   13.00    9.70
   7   4  13   20.20    3.90
   0  -5 -13   68.69   21.00
   0   5 -13   23.40   22.40
   0   5  13   18.20    5.70
   0   5  13   -2.50   15.00
   0   5  13   22.50    6.80
   0  -5  13    5.40   27.90
  -1   5  13   52.69   20.90
  -1   5  13   27.90    7.40
  -1  -5 -13    9.60   36.10
  -1   5  13   36.40    7.30
   1  -5  13    7.10   21.20
   1   5 -13   16.80   31.70
   1   5  13   37.60    7.70
  -1  -5  13   28.40   25.90
   1  -5 -13   42.90   30.20
  -1   5 -13    5.00   29.90
  -1  -5  13   20.20   19.70
  -2   5  13    4.20    5.80
  -2  -5 -13   29.90   64.49
  -2   5  13   -5.40    4.80
  -2   5  13   -2.70   19.60
  -2  -5  13   -4.20   15.80
  -2   5 -13   -1.60   26.50
   2   5  13   -2.00    4.80
   2   5  13   -4.20    4.60
   2  -5 -13   18.20   30.80
   2   5  13   12.70   16.40
  -2  -5  13   -7.30   30.70
  -3   5  13   49.40   26.40
  -3   5  13   17.60    7.90
  -3   5  13   39.90    7.80
  -3  -5  13   -5.30   42.50
   3  -5 -13  128.89   62.29
   3   5  13   33.60    6.70
  -3  -5  13   37.70   21.50
   3   5  13   22.70    6.70
   3   5  13   48.40   20.60
  -3   5 -13   -8.50   38.00
  -4   5  13   -0.90    5.70
  -4   5  13    0.90    3.80
  -4   5  13  -54.79   34.80
  -4  -5  13  -13.40   19.00
   4   5  13    2.60    3.00
   4   5  13   14.70   17.00
   4   5  13   19.30    7.50
  -5   5  13   19.10   10.50
  -5   5  13   28.40    5.70
   5   5  13   28.50    5.60
  -5  -5  13   36.00   14.10
   5   5  13   21.20   12.00
   6  -5  13   30.70    6.60
   6   5  13   20.30    3.50
  -6  -5  13   30.00   11.70
   6   5  13    7.00    5.20
   6   5  13    1.50    7.60
   0   6  13   56.89   11.20
   0  -6 -13   35.20   38.20
   0  -6  13   -6.40   24.00
   0   6  13   54.79   11.10
   0   6 -13   50.49   35.40
  -1   6  13   12.40    6.10
  -1   6  13   10.30    7.30
   1   6 -13   31.20   39.70
  -1  -6 -13  -29.60   49.99
  -1  -6 -13   19.90   14.50
   1  -6  13   23.20   24.00
  -1   6  13  -12.50   15.30
  -1   6 -13    8.70   23.20
  -1  -6  13  -12.40   25.30
   1  -6 -13   26.10   31.90
   1   6  13   21.70    4.70
  -1  -6  13   13.20   24.80
   1   6  13    6.10    5.30
  -2   6  13   22.40    8.40
  -2  -6 -13   31.80   23.90
  -2  -6 -13  102.69   73.99
  -2   6  13   -7.80   22.80
   2   6  13   11.60    7.60
  -2  -6  13   24.70   19.00
  -2   6 -13    3.30   23.10
   2  -6 -13    4.00   35.30
  -2  -6  13  -11.50   33.40
   2   6  13   12.90    5.90
  -3   6  13   59.89    9.90
  -3   6  13   73.69   28.50
   3   6  13   42.20    8.90
  -3  -6  13   32.00   16.60
   3   6  13   37.70    8.70
  -4   6  13    8.60    4.20
  -4  -6 -13   25.20   17.20
  -4   6  13    6.10    6.70
   4   6  13   24.60    5.50
   4   6  13   14.90    3.70
  -4  -6  13    7.30   12.30
   4   6  13    3.30   10.10
   5  -6  13    8.90    5.60
  -5  -6 -13   44.80   15.90
  -5   6  13   16.80    4.10
   5   6  13   23.40    5.70
   5   6  13   10.00    8.80
   5   6  13    5.90   12.20
  -5  -6  13   24.00   11.60
  -6   6  13    2.90    3.20
  -6  -6 -13    4.70   11.50
   6  -6  13    2.70    5.40
   6   6  13    4.70    2.00
  -6  -6  13    1.60    9.50
  -1   7  13   57.59    9.50
  -1  -7 -13   73.39   15.50
  -1   7  13   56.89   10.00
   1   7  13   33.60    9.60
   1   7  13   44.90    9.70
  -2   7  13   -0.70    5.90
  -2   7  13    5.50    3.80
  -2  -7 -13   20.70   11.90
   2   7  13   10.30    4.50
   2   7  13   11.80    4.00
  -2  -7  13   42.30   20.20
  -3   7  13    9.10    6.70
  -3   7  13    4.60    3.70
  -3  -7 -13   16.40   12.00
   3   7  13    8.80    3.50
   3   7  13    6.80    4.10
  -3  -7  13   18.00   15.70
  -4  -7 -13    3.00   10.80
   4   7 -13   -1.10   11.50
  -4   7  13    3.00    3.20
   4   7  13    7.60    3.90
   4   7  13    4.90    2.90
  -4  -7  13   -0.10   13.60
   5  -7  13    4.40    4.80
  -5   7  13    6.50    2.50
  -5  -7 -13    6.30   12.30
   5   7  13    7.10    4.30
   5   7  13    6.60    2.40
  -5  -7  13   10.80   11.60
   0   8  13   71.59   11.10
   0   8  13   61.89   12.10
  -2  -8 -13   16.50   13.40
  -2   8  13   20.40    9.90
  -2   8  13    3.20    4.10
   2   8  13   13.50    4.20
  -3   8  13   29.60    5.40
  -3  -8 -13   46.10   14.80
   3   8  13   23.90    5.70
   4  -8  13   11.20    4.60
  -4  -8 -13    9.40   14.60
   0   9  13   61.69   11.30
   0   9  13   70.79   11.00
  -1   9  13    3.50    3.50
   1   9  13    8.80    3.50
   0   0  14  127.69   20.60
   0   0 -14   92.29   30.80
   1   0 -14  112.49   30.30
  -1   0  14   81.09   17.70
   1   0  14  112.29   18.20
  -2   0  14  -10.60   18.00
   2   0  14   -0.80    9.60
   2   0  14   -6.50    9.80
  -2   0 -14  -12.70   40.10
  -2   0  14  -16.70   22.60
   2   0 -14   -2.10   24.90
  -2   0  14   -5.60    7.20
   3   0  14   -4.10    7.10
  -3   0  14   -3.00   22.10
   3   0  14  -11.70   29.60
  -3   0  14   -0.50    8.00
  -4   0  14   31.50   24.10
  -4   0  14  -23.90   38.10
   4   0  14   11.80    6.50
  -4   0  14   20.30    8.30
   4   0  14   30.20   28.20
   5   0 -14   12.60   13.80
  -5   0  14    0.20    9.10
   5   0  14    1.40    6.70
   5   0  14    3.00    5.10
  -5   0  14   11.30   33.00
   5   0  14    6.50   17.90
   6   0  14   20.20    5.90
  -6   0  14    0.90    5.50
  -6   0  14    8.90   14.60
   6   0 -14   15.00    9.50
   6   0  14    3.80   11.10
  -7   0  14   -2.70    4.90
   7   0  14    1.10    8.10
  -7   0  14   11.20   10.10
   7   0 -14    8.50    6.60
   7   0  14   -0.40    2.30
   0   1  14   11.90    6.00
   0   1 -14   12.00   24.00
   0  -1 -14   10.80   26.20
   0  -1  14   11.70    7.00
   0  -1  14   28.50   16.60
   0   1  14   35.20   18.70
  -1   1  14   30.60    8.70
   1  -1  14   54.39   10.60
  -1   1  14   24.70   20.50
  -1  -1 -14   38.00   35.40
   1   1 -14   22.50   21.70
   1   1  14   50.49   18.70
  -1  -1  14   51.69   17.70
  -1  -1  14   40.40   20.60
   1   1  14   37.20    8.70
  -1  -1  14   19.80    8.10
   1   1  14   69.49   15.80
   1  -1 -14   21.90   25.10
  -1   1 -14    6.00   28.20
  -2   1  14   23.10    9.00
   2  -1  14   -1.20   27.30
  -2   1  14   61.49   21.60
  -2  -1 -14    8.10   44.30
   2   1 -14   25.50   29.10
  -2  -1  14   51.19   19.20
   2   1  14   32.00   28.50
   2  -1 -14   -2.60   28.40
  -2  -1  14   -9.80   21.80
   2   1  14   39.10    9.60
  -2   1 -14   27.00   35.50
   2   1  14   34.70   12.00
  -3   1  14   27.70   10.40
  -3   1  14   69.39   23.10
  -3   1  14   71.19   34.00
   3   1  14   28.00   10.20
   3  -1 -14   84.09   82.89
   3   1  14   59.89   13.80
  -3  -1  14   37.00   21.40
   3   1  14    5.30   28.30
  -3  -1  14   21.90    9.80
  -4   1  14   80.79   16.90
   4  -1  14   72.69   14.40
  -4   1  14   84.99   38.20
   4  -1  14  141.29   39.50
   4   1  14   99.89   15.60
   4   1  14   35.40   28.90
  -4  -1  14  151.18   45.20
  -4  -1  14   60.89   15.30
  -5   1  14   19.20   24.60
   5  -1  14   -9.20   20.30
  -5   1  14   -4.50    6.70
   5  -1  14    1.90    5.60
  -5  -1  14   45.60   30.10
   5   1  14   -4.60   18.70
  -5  -1  14  -10.70   13.10
   5   1  14    2.90    4.40
   5   1  14   -2.70    7.20
   5  -1 -14    7.90   11.40
  -6   1  14    8.80    4.90
  -6   1  14   18.90   12.40
   6  -1  14    7.80    3.90
   6  -1  14  -14.10   12.80
   6   1 -14   21.20    9.40
  -6  -1  14   18.10   15.10
  -6  -1  14    1.20    4.90
   6   1  14   10.90    4.40
   6   1  14    3.90    3.00
   6   1  14   10.40   12.30
   6  -1 -14    8.70    8.30
   7   1 -14   10.10    7.30
   7  -1  14   -1.70    2.90
   7  -1  14   -4.60    9.20
  -7   1  14    2.10    6.10
  -7   1  14    7.40    9.00
  -7  -1  14    1.80   11.00
   7  -1 -14   -0.30    6.00
   7   1  14   19.60    6.40
   7   1  14   -1.00    2.50
   7   1  14    2.00    7.40
  -7  -1  14   10.40    6.40
   0   2  14    8.70   18.00
   0  -2 -14    7.90   27.30
   0   2 -14  -14.80   20.70
   0  -2  14   -0.90   16.60
   0  -2  14   -3.10    7.80
   0   2  14    5.30    5.70
  -1   2  14   14.20    7.50
   1   2 -14   39.60   22.60
  -1  -2 -14  -11.40   31.30
  -1   2  14   24.20   20.60
   1  -2  14   42.10   12.80
   1  -2  14   26.10   19.20
   1   2  14   23.00   26.40
  -1   2 -14   -3.20   25.80
  -1  -2  14   26.20   16.60
   1   2  14   37.50   15.00
   1  -2 -14   10.60   23.80
  -1  -2  14   25.80   20.80
   1   2  14   21.00    6.70
  -1  -2  14   16.00    7.80
  -2   2  14   65.19   28.80
  -2  -2 -14   36.40   54.89
  -2   2  14   48.80   20.30
  -2   2  14   16.50    7.70
   2   2 -14    0.60   35.40
  -2  -2  14   20.60   17.00
   2   2  14   20.10    7.30
   2   2  14   -1.40   23.00
   2   2  14   18.00   11.60
  -2  -2  14   28.60   24.20
  -2   2 -14    4.40   29.90
   2  -2 -14   -5.20   31.20
  -3   2  14   74.39   29.90
  -3   2  14   39.60   10.80
  -3   2  14   85.79   24.00
   3   2  14   36.10   11.70
   3   2  14   60.49   28.70
   3  -2 -14   88.89   50.29
  -3  -2  14   36.90   21.80
  -3   2 -14   34.60   39.30
  -3  -2  14   37.00   32.40
   4  -2  14   11.90    5.90
  -4   2  14   11.30   33.60
  -4   2  14   45.20   22.80
  -4   2  14    3.70    7.50
  -4  -2  14   10.00   21.40
   4  -2 -14   28.90   21.60
  -4  -2  14   -8.70   36.80
   4   2  14   21.30    8.60
   4   2  14   23.40   25.90
  -5   2  14    0.50    4.90
  -5   2  14   45.30   19.60
   5  -2  14    2.40    4.50
   5  -2  14    6.80   29.70
  -5  -2  14   -7.00   17.80
   5   2  14   11.90    4.00
   5   2  14   30.80   16.50
   5   2  14    6.00    5.00
   5  -2 -14   21.60   10.00
   6  -2  14   10.70   15.80
  -6   2  14   31.60   12.80
  -6   2  14    3.60    5.20
  -6  -2  14   30.10   15.30
   6  -2 -14   13.90    8.20
   6   2  14    9.10   11.20
   6   2  14   16.50    3.90
  -6  -2  14    4.00    5.60
   7  -2  14   10.90    3.70
  -7   2  14   21.20    9.40
   7   2 -14   19.90    7.00
   7  -2  14   12.10   12.70
   7   2  14   11.10    3.10
   7  -2 -14   14.80    7.10
  -7  -2  14   12.60   11.20
  -7  -2  14    8.40    5.30
   7   2  14    2.30    7.00
   7   2  14   20.20    4.40
   0  -3 -14   10.40   29.90
   0   3 -14   28.70   21.80
   0  -3  14   70.09   20.20
   0   3  14   37.80    8.30
   0   3  14   65.29   18.70
   0  -3  14   27.00   11.50
   1   3 -14  -34.50   26.40
  -1   3  14   25.10   26.00
  -1   3  14    7.50    6.40
  -1   3  14    8.00    5.10
  -1   3 -14   18.50   26.70
   1   3  14   15.80    5.80
  -1  -3  14   -1.70   16.20
   1  -3 -14   72.69   28.60
  -1  -3  14   23.30   27.70
   1   3  14   -1.70   21.40
  -1  -3  14   15.60    8.00
   1  -3 -14   -7.40   25.60
  -2   3  14  193.58   27.80
  -2  -3  14  156.18   37.00
  -2   3 -14   83.39   55.89
   2   3  14  150.98   35.30
   2   3  14  173.48   26.80
  -3   3  14   -6.30    5.80
  -3   3  14   15.00   20.20
  -3   3  14  -34.20   28.20
  -3  -3  14   16.90   29.00
   3   3  14    0.90   23.10
   3   3  14   10.20    7.60
  -3   3 -14   -0.20   49.80
  -3  -3  14    2.00   18.80
   3  -3 -14   78.69   61.89
   3   3  14   -5.40   10.50
  -4   3  14  -30.70   35.90
  -4   3  14   39.00   27.60
   4   3  14   -0.30    4.70
  -4  -3  14  -53.39   51.29
   4   3  14    9.50    7.60
  -4  -3  14    8.70   25.30
   4   3  14   28.80   22.90
  -5   3  14   35.60   15.80
   5  -3  14   19.00    6.40
   5  -3 -14   24.00   11.50
   5   3  14   30.80   17.70
  -5  -3  14    5.20   19.20
   5   3  14   29.00    5.70
  -6   3  14   23.60   12.00
   6  -3  14    0.90    3.80
  -6   3  14    3.20    7.50
   6   3 -14   15.10    9.40
  -6  -3  14    0.50    4.30
   6  -3 -14   -7.90   11.30
  -6  -3  14   -2.20   12.60
   6   3  14    2.20    3.70
   6   3  14   -3.20    8.90
   7  -3  14   -3.00    4.00
  -7   3  14   12.00   11.60
   7   3 -14   10.90    6.90
  -7   3  14   -1.90    2.30
  -7  -3  14    5.30   11.00
   7   3  14    3.30    2.40
   7   3  14   -1.80    6.50
   7   3  14    5.90    2.50
  -7  -3  14    0.20    3.60
   0   4  14   59.59   11.30
   0   4  14   59.39   17.20
   0  -4  14   51.99   21.60
   0   4 -14   20.40   26.00
   0  -4 -14   14.70   29.40
   0  -4  14   60.29   15.10
  -1  -4 -14   11.20   36.20
  -1   4  14   65.99   18.60
  -1   4  14   15.40    6.20
   1  -4  14   19.30   21.40
  -1   4  14   16.40    5.40
   1   4 -14    0.70   34.20
   1  -4 -14    0.30   26.30
  -1   4 -14    7.60   23.60
  -1  -4  14   27.90   21.80
  -1  -4  14    1.70   20.90
   1   4  14   25.20    6.70
   2   4 -14  181.88   95.09
  -2   4  14   60.69   10.10
  -2   4  14   61.39   12.50
  -2  -4 -14   76.49   70.69
   2  -4 -14   45.60   34.00
   2   4  14   20.50   20.20
  -2  -4  14   23.50   26.70
  -2  -4  14   38.20   19.60
   2   4  14   55.49   11.20
  -2   4 -14   15.80   27.20
  -3   4  14   20.70   10.90
  -3   4  14   62.89   26.30
  -3  -4  14   56.59   24.00
  -3   4 -14   24.70   41.20
   3   4  14   35.20   25.30
  -3  -4  14   28.30   33.10
   3   4  14   45.00    9.40
   3   4  14   75.19   14.10
  -4   4  14  -44.80   64.99
  -4   4  14    0.60    5.50
  -4   4  14   36.70   16.00
  -4   4  14    8.10    4.60
   4   4  14  -11.00    7.10
   4   4  14    4.50    2.80
   4   4  14   32.20   16.20
  -4  -4  14    5.40   17.00
   4   4  14    3.10    6.80
  -5   4  14   28.30    6.30
  -5  -4  14   47.30   16.00
   5   4  14   33.10    6.10
   5   4  14   27.10   14.90
  -6   4  14    2.90    2.80
   6   4 -14    5.90    8.70
   6  -4  14   10.80    4.20
   6   4  14    1.80    7.90
  -6  -4  14   12.80   10.90
   6   4  14    2.10    2.00
   6   4  14    4.60    3.90
   0  -5  14   89.09   28.20
   0   5  14  106.89   17.10
   0  -5 -14   31.90   34.10
   0   5  14  102.79   16.60
   0   5 -14   52.79   35.60
  -1   5  14   73.49   18.70
   1   5 -14   63.19   42.30
  -1  -5 -14   13.60   53.79
  -1   5  14   19.50    7.10
   1  -5  14   43.30   26.50
  -1  -5  14   51.69   12.30
   1  -5 -14  -23.20   29.50
  -1  -5  14   15.50   24.30
   1   5  14   29.70    7.10
  -1   5 -14   25.50   23.60
  -2   5  14   18.90    5.00
  -2   5  14    7.60    7.60
  -2   5  14  -13.00   20.20
  -2  -5 -14  140.49   69.29
   2  -5 -14    3.00   35.30
  -2   5 -14   13.60   26.90
   2   5  14   14.00    7.20
  -2  -5  14   30.80   17.10
   2   5  14   17.10    8.50
  -2  -5  14   17.20   29.30
  -3   5  14   -0.30    4.30
  -3   5  14   -7.50   27.00
  -3   5  14    1.10    5.40
   3   5  14   11.70   14.30
  -3  -5  14  -14.20   15.90
   3   5  14   -0.80    3.20
   3   5  14   -2.60    4.30
  -4  -5  14   22.40   14.70
   4   5  14   21.10    6.00
   4   5  14   24.80   13.30
   5  -5  14   15.50    5.90
  -5   5  14   22.20    5.00
   5   5  14   26.90    4.90
   5   5  14   25.30   11.50
   5   5  14   19.10    8.00
   5   5  14   37.80    9.80
  -5  -5  14   33.80   13.50
  -6   5  14   19.90    4.10
   6  -5  14   16.60    5.50
  -6  -5 -14   32.30   12.00
   6   5  14    4.00    9.00
   6   5  14   20.90    3.90
  -6  -5  14   39.60   16.60
   0   6  14  113.09   18.30
   0   6  14  118.19   17.60
   0   6  14  110.69   18.40
   0  -6 -14   66.19   60.79
   0   6 -14  132.19   95.39
   0  -6  14   77.99   52.59
  -1   6  14    1.00    4.60
  -1  -6 -14   21.10   12.60
   1  -6 -14   16.40   34.00
   1   6  14   14.90    4.60
   1   6  14   10.70    4.40
  -1  -6  14  -16.40   40.20
  -1   6 -14   16.10   33.70
  -2   6  14   46.30   10.80
  -2   6  14   62.19    9.70
   2   6  14   46.50    9.60
   2   6  14   46.50    9.10
  -3  -6 -14   -3.20   11.40
  -3   6  14   10.00    5.10
  -3   6  14    7.10    3.90
   3   6  14    9.80    4.00
   3   6  14   -1.90    2.70
  -3  -6  14  -13.30   15.70
  -4  -6 -14   47.00   13.50
  -4   6  14    8.20    9.90
  -4   6  14   20.00    5.70
   4   6  14   37.90    7.20
  -4  -6  14   40.10   14.70
   4   6  14   31.00    5.50
  -5   6  14    7.70    4.10
   5   6 -14   24.90   10.10
   5  -6  14   16.30    6.60
  -5  -6 -14   45.70   15.50
   5   6  14   13.60    5.90
   5   6  14   14.90    3.30
  -5  -6  14    2.80   12.20
   0   7  14   42.40    8.50
  -1   7  14   71.39   12.80
  -1  -7 -14   98.99   20.70
  -2   7  14   43.70    8.50
   2   7  14   34.20    7.50
  -3   7  14   50.09   11.40
  -3   7  14   53.59    9.40
   3   7  14   53.49    9.70
   3   7  14   65.69    9.70
  -3  -7  14   34.70   12.20
   4  -7  14   53.89    9.70
  -4   7  14   45.90    8.50
   4   7  14   41.60    8.60
   4   7  14   55.79    8.40
   0   8  14    1.10    4.90
   0   8  14   -7.80    3.90
  -1   8  14   30.30    6.80
  -1   8  14   38.80    6.60
  -2   8  14   20.60    7.50
  -2   8  14   19.00    5.10
   0   0  15    4.00    5.40
   0   0  15   15.40   27.10
   0   0 -15  -45.40   44.70
   1   0  15    9.60   11.70
   1   0  15    6.70    7.50
   1   0  15   17.60   27.80
  -1   0  15   33.20   30.30
  -1   0 -15   24.30   53.19
  -1   0  15   -2.70    7.40
  -2   0  15  136.79   29.10
   2   0 -15  184.08   48.80
   2   0  15  114.89   23.50
   2   0  15  112.19   23.40
  -2   0 -15  125.69   56.69
  -2   0  15  105.39   33.00
  -3   0  15   21.50   19.50
   3   0  15   -0.70    8.10
  -3   0  15  -51.49   32.20
  -3   0  15   11.10    7.20
  -4   0  15    5.50   21.90
  -4   0  15   40.70   41.90
  -4   0  15   -0.60   11.60
   4   0  15   28.60   24.10
   4   0  15    0.40    5.10
   5   0 -15   91.69   17.30
   5   0  15   23.50   18.80
   5   0  15   64.39   11.90
  -5   0  15   81.89   21.30
  -6   0  15   19.80   13.60
   6   0  15    0.00    3.00
  -6   0  15    3.50    5.00
   6   0  15    1.50   12.40
   6   0 -15    8.10    7.70
   6   0  15    0.70    5.70
   0  -1  15   37.70    9.40
   0   1 -15   35.70   39.30
   0  -1  15   65.99   25.90
   0   1  15   35.20    8.00
   0  -1 -15   34.80   28.60
   1   1 -15   43.30   34.20
   1  -1  15   -0.50   19.90
  -1  -1 -15   12.20   32.20
   1  -1  15    9.70    9.40
  -1   1  15    2.80    5.80
  -1   1  15   21.30   22.80
  -1  -1  15    4.00    6.80
  -1   1 -15    4.40   32.90
   1  -1 -15  -31.40   27.30
   1   1  15   13.70    6.50
  -1  -1  15   21.30   22.50
  -2   1  15   22.80    9.40
   2   1 -15  -21.90   44.90
  -2   1  15   62.69   16.80
  -2  -1 -15   61.59   60.99
  -2   1  15   37.50   27.60
  -2  -1  15   55.99   29.70
  -2   1 -15   63.29   44.00
   2  -1 -15   27.20   42.80
   2   1  15   38.60   10.10
   2   1  15   46.90   13.00
  -2  -1  15   41.40   16.40
   3  -1  15    9.20    6.50
  -3   1  15   -0.20    7.70
  -3   1  15  -21.70   35.40
  -3   1  15   18.70   20.40
  -3  -1  15    1.70   33.70
  -3  -1  15    1.70   18.10
  -3   1 -15    1.10   61.29
   3   1  15   -8.90   35.70
  -3  -1  15   -1.10    6.70
   4  -1  15   19.70    5.80
  -4   1  15   37.50   20.80
  -4   1  15   23.90   37.00
  -4   1  15    4.00    7.40
   4   1  15    8.00   23.30
  -4  -1  15   53.29   20.80
  -4  -1  15   12.20   43.80
  -4  -1  15    9.30    8.70
   4   1  15   11.20    5.90
   5  -1  15   47.40   37.80
   5  -1  15   12.50    4.40
  -5   1  15   56.69   16.70
  -5   1  15   10.80    5.20
   5   1  15   -4.20   13.10
   5   1  15   22.30    4.20
  -5  -1  15    8.40    5.60
  -5  -1  15   33.80   18.80
   5   1  15   18.10    5.00
  -6   1  15   -2.30   11.80
   6   1 -15   12.40    6.90
  -6   1  15    1.50    4.30
   6  -1  15    0.80   15.60
   6  -1  15    7.40    3.10
   6   1  15    2.60    4.50
   6   1  15   -1.10    2.80
   6   1  15   22.80    9.20
  -6  -1  15   -5.90    4.40
   6  -1 -15   -2.70    6.40
  -6  -1  15    4.30   13.50
   0  -2  15    7.10   20.70
   0  -2 -15    7.90   27.00
   0   2  15    3.80    5.30
   0  -2  15   -7.50    7.50
   0   2  15  -22.20   17.60
   0   2 -15    7.80   22.60
  -1   2  15   54.99   22.20
   1   2 -15   -8.90   30.40
   1  -2  15   28.50   13.10
   1  -2  15   -4.00   21.70
  -1  -2 -15    9.10   36.20
  -1   2  15   17.70    6.80
  -1  -2  15    6.20   21.40
  -1   2 -15   12.20   25.50
   1  -2 -15   16.40   26.80
   1   2  15   17.30    6.20
  -1  -2  15   12.80    7.20
   2   2 -15   -4.50   47.20
  -2   2  15   13.40    6.40
  -2  -2 -15  -33.70   59.59
  -2   2  15  -12.90   25.10
  -2  -2  15   15.60   23.00
   2  -2 -15    4.80   48.50
   2   2  15    9.90    7.00
  -2  -2  15   13.60   14.90
  -2  -2  15    7.90    6.90
   2   2  15   -3.40   35.70
  -2   2 -15   63.69   40.80
  -3   2  15   -2.00    7.30
  -3   2  15   17.40   25.30
  -3   2  15  -22.60   32.90
  -3  -2  15    4.10    8.00
  -3  -2  15    4.10   32.60
   3   2  15   23.00    8.40
   3   2  15    3.70   27.60
   3  -2 -15    6.20   13.40
   3   2  15    2.60    8.60
  -3   2 -15  -31.10   48.40
  -3  -2  15   22.60   22.20
  -4   2  15   -0.40    4.60
  -4   2  15  -74.99   56.19
  -4   2  15   25.60   15.90
   4  -2  15    6.80    4.30
   4  -2 -15   14.20   10.50
   4   2  15   11.00   17.70
  -4  -2  15    4.40    7.40
  -4  -2  15   17.10   17.60
   4   2  15   -1.20    6.10
   4   2  15    8.00    3.50
  -5   2  15   14.10    5.40
   5  -2 -15   28.80    9.80
  -5  -2  15   19.50    6.50
   5   2  15   10.50   15.00
   5   2  15   13.20    3.30
   5   2  15   11.80    5.10
  -5  -2  15   20.90   17.30
  -6   2  15   12.60    5.50
   6   2  15   17.60    4.20
  -6  -2  15   21.40   13.10
   6   2  15   18.50    3.90
  -6  -2  15    4.30    5.30
   6  -2 -15   14.70    8.20
   6   2  15    7.00    8.70
   0  -3  15   24.60   12.40
   0  -3 -15    5.40   29.90
   0   3  15   28.30    7.00
   0  -3  15   42.20   22.90
   0   3  15   48.50   23.30
   0   3 -15   -3.10   27.00
  -1   3  15   25.50   20.20
   1  -3  15    9.70   32.70
  -1  -3 -15   20.60   48.40
   1   3 -15   66.19   42.20
  -1   3  15   30.80    7.30
   1  -3 -15   -5.50   24.90
  -1  -3  15   12.70    9.30
  -1  -3  15   28.60   21.70
  -1   3 -15   -1.20   23.40
   1   3  15   18.10    5.60
  -2   3  15    3.10    7.00
  -2  -3 -15   57.19   66.09
   2   3 -15   -4.60   72.09
  -2   3  15  -23.80   23.10
   2  -3 -15    7.30   59.39
  -2   3 -15    5.90   38.60
   2   3  15    8.60   34.20
   2   3  15    9.50    8.40
  -2  -3  15    8.70    8.40
  -2  -3  15    6.50   27.50
  -3   3  15   16.00   28.80
  -3   3  15    9.50    4.00
  -3   3  15    1.80    5.40
  -3  -3  15   -3.70    7.30
  -3  -3  15   -0.30   14.40
  -3  -3  15   12.20   33.50
   3   3  15   17.00   20.90
  -3   3 -15    6.50   55.89
   3   3  15   11.10    6.30
   3   3  15  -11.50   11.30
  -4   3  15   16.40    5.20
  -4   3  15   19.30    5.90
   4   3  15    6.90   16.30
  -4  -3  15   40.30   16.50
   4   3  15   17.20    4.10
   4   3  15   17.40    6.90
  -5   3  15   46.70    9.10
  -5   3  15   55.39    9.40
   5  -3  15   35.50    8.60
   5   3  15   43.40    7.40
   5   3  15   14.30   13.50
  -5  -3  15   34.10   16.60
   5   3  15   55.49    9.90
   6   3 -15   29.40    7.70
  -6   3  15    2.60    3.30
   6   3  15   -5.50    7.90
  -6  -3  15    2.20    4.30
  -6  -3  15   11.60   13.30
   6   3  15   13.10    4.10
   0   4  15   21.70    7.30
   0  -4  15   34.10   19.80
   0  -4  15   25.10   24.40
   0   4 -15   18.80   34.00
   0  -4 -15   13.30   45.20
  -1   4  15   15.50    4.50
  -1  -4 -15   68.99   57.49
  -1   4  15   27.80   19.30
   1   4 -15   81.99   48.20
   1  -4 -15    7.80   29.50
   1   4  15   26.40    7.10
  -1  -4  15   59.89   25.90
  -1   4 -15   12.60   23.40
  -2   4  15  -16.60   21.20
  -2   4  15    6.90    4.90
  -2  -4  15   37.50   28.10
  -2  -4  15    9.40    6.50
   2  -4 -15  -71.19   67.89
  -2   4 -15   -9.90   35.80
  -3   4  15   10.20    4.30
  -3   4  15   -1.40    4.50
  -3  -4  15   27.50   13.40
   3   4  15    6.50    5.00
   3   4  15   -1.00    2.90
   3   4  15  -19.30   17.40
  -3  -4  15   -5.30    5.60
  -4   4  15   15.60    4.10
   4  -4  15    7.80    4.20
  -4   4  15    7.80    4.50
  -4  -4  15    3.20    5.30
   4   4  15   10.80   14.70
  -4  -4  15    8.20   14.80
   4   4  15    2.70    2.10
  -5   4  15   20.70    4.80
   5  -4  15   20.90    5.30
  -5   4  15   23.70    6.80
   5   4  15   22.40   10.50
   5   4  15   15.20    6.60
  -5  -4  15   50.39   16.30
  -6  -4 -15   10.00    9.50
   6   4  15   -3.60    5.70
  -6  -4  15    1.70   11.20
   6   4  15    2.50    1.60
  -6  -4  15    5.10    4.00
   0  -5 -15   32.70   62.79
  -1   5  15   13.90    3.90
  -1   5  15   12.50    5.00
   1   5  15   22.70    5.40
   1   5  15    5.90    4.00
  -1  -5  15   42.00   10.50
  -1   5 -15   10.50   36.20
   1  -5 -15  -39.40   30.00
  -2   5  15   43.70    9.30
  -2   5  15   52.89    8.80
  -2  -5  15   33.40   10.30
   2   5  15   51.99    8.80
   2   5  15   40.70    8.90
  -3   5  15   23.80    5.60
  -3   5  15   18.90    5.20
  -3  -5  15   56.79   16.30
  -3  -5  15    7.50    7.60
   3   5  15   25.20    5.20
   3   5  15   26.60    5.30
  -4   5  15   30.80    5.00
   4  -5  15   12.50    4.90
  -4   5  15   12.60    6.80
  -4  -5  15   15.40    6.50
  -4  -5  15   12.10   16.20
   4   5  15   22.60    4.00
  -5  -5 -15   17.00   15.50
   5   5 -15   25.00    8.50
  -5   5  15    8.40    5.30
   5   5  15   23.20    4.50
  -5  -5  15   32.70   14.30
  -5  -5  15    7.60    7.10
   0   6  15   -1.40    3.40
  -1   6  15   61.69   11.20
  -2   6  15   37.50    5.90
  -2   6  15   21.00    6.50
  -2  -6  15   25.60   10.80
   2   6  15   29.60    6.00
   2   6  15   24.20    5.70
  -3   6  15   15.20    4.00
  -3   6  15    8.20    6.10
  -3  -6 -15   13.60   11.90
   3   6  15   11.70    4.10
  -3  -6  15  -11.00   10.60
  -4   6  15   49.80    7.80
   4  -6  15   29.20    8.40
   4   6  15   39.50    6.50
   4   6  15   33.50    7.70
   0   7  15   -1.20    4.10
  -1   7  15   74.99   13.40
  -1   7  15   96.29   13.80
   1   7  15   76.79   13.10
  -2   7  15   31.60    5.60
  -2   7  15   11.80    5.30
   2   7  15   17.40    4.70
  -3  -7 -15   57.09   20.00
   0   0  16  -18.00   20.60
   0   0 -16   24.20   25.80
   0   0  16    6.80    7.00
  -1   0  16   26.90    7.20
   1   0 -16   83.89   41.00
  -1   0  16   41.70   25.00
   1   0  16   24.10   17.00
  -1   0 -16   30.20   38.20
   1   0  16   31.40   10.60
  -2   0  16   15.00   31.50
  -2   0 -16   48.50   50.09
   2   0  16   45.10   11.10
   2   0 -16   23.00   56.49
  -3   0  16   22.80   11.80
   3   0  16    3.60    5.90
  -3   0  16    1.70   45.70
  -3   0  16   -1.30    5.80
   4   0  16   68.59   12.20
   5   0  16   -3.60    3.20
   5   0  16   -1.60    3.70
   5   0 -16    1.00    7.20
  -5   0  16    7.90   15.50
  -5   0  16   -5.80    4.80
   6   0 -16    1.40    5.60
  -6   0  16   13.50   14.50
  -6   0  16    3.70    3.70
   6   0  16   -0.60    2.50
   0   1 -16    4.10   24.40
   0   1  16   22.70   19.50
   0  -1 -16    4.20   24.30
   0  -1  16   27.40   22.90
   0  -1  16    7.50   14.10
  -1   1  16   80.29   15.90
   1   1 -16  176.98   47.10
  -1  -1 -16   67.49   46.30
  -1   1  16   56.69   27.90
   1  -1  16   91.79   19.90
   1   1  16   93.09   19.60
  -1  -1  16  161.58   30.60
   1  -1 -16   39.00   42.50
  -1   1 -16   66.89   40.40
  -1  -1  16   84.69   16.20
  -2   1  16   34.20   31.00
  -2  -1 -16  -13.90   58.89
   2  -1  16   33.50    8.90
  -2   1 -16   59.69   44.30
   2  -1 -16  188.58   62.89
  -2  -1  16   26.10   10.50
  -2  -1  16   36.90   28.80
   2   1  16   27.10   12.30
  -3   1  16   23.40   16.40
  -3   1  16    5.00    5.10
  -3   1  16  -61.39   51.39
   3  -1  16   -3.10    5.40
  -3  -1  16    4.10   12.30
   3   1  16   -1.50    6.50
  -3  -1  16    6.80    5.10
  -3  -1  16   23.80   45.20
  -4   1  16   12.40    5.70
   4   1  16   18.10   20.80
   4  -1 -16   29.20   10.30
   4   1  16   18.90    4.10
  -4  -1  16   12.80    5.60
  -4  -1  16   22.20   14.90
   4   1  16   19.70    5.90
  -5   1  16   13.70    5.60
   5  -1  16   47.90    8.20
   5   1  16   27.50    5.50
  -5  -1  16   48.80   15.90
  -5  -1  16   12.00    6.10
   5   1  16   25.90    5.30
   5   1  16    7.60   15.70
   5  -1 -16   40.80   10.50
   6   1 -16    7.30    6.80
   6  -1  16    5.50    2.80
  -6   1  16    5.20    3.80
  -6   1  16   13.90   16.10
  -6   1  16    4.30    4.00
  -6  -1  16   10.90   14.90
  -6  -1  16    9.20    4.10
   6   1  16    8.60    2.50
   6  -1 -16   -8.50    8.50
   6   1  16   19.80    6.80
   0   2  16   51.09   12.50
   0  -2 -16   -7.00   26.40
   0  -2  16   28.10   34.80
   0  -2  16   52.79   11.20
   0   2 -16   37.00   27.30
  -1  -2 -16  -22.00   45.60
  -1   2  16   11.30    8.40
   1   2 -16  -24.60   48.70
  -1   2  16  -10.70   21.90
   1  -2  16   66.29   17.50
  -1   2 -16   14.80   32.00
  -1  -2  16   23.10    7.60
  -1  -2  16   50.09   26.80
   1   2  16   28.90    7.10
   1  -2 -16   67.09   43.50
  -2   2  16   10.30    4.50
  -2   2  16   20.10   25.90
  -2   2  16   20.30    6.40
   2   2  16   19.90    5.80
  -2  -2  16    4.90    6.20
  -2  -2  16   -1.90   27.70
  -2   2 -16   97.89   66.79
  -3   2  16   16.00    4.10
   3  -2  16    2.50    3.90
  -3   2  16   -0.20    4.70
  -3  -2  16    7.10    5.80
   3   2  16    1.70    8.20
   3   2  16    9.40   20.00
   3   2  16   17.10    7.50
  -3  -2  16   16.80   13.00
  -4   2  16   23.00    5.80
  -4   2  16   18.40    4.90
  -4  -2  16   15.00    6.00
   4   2  16   26.90   16.50
  -4  -2  16   47.10   15.00
   4   2  16   10.70    5.80
   4   2  16   10.30    3.00
  -5   2  16   16.80    5.40
  -5   2  16   14.40    5.20
   5  -2  16   22.10    4.60
  -5  -2  16   43.80   15.70
  -5  -2  16   18.20    6.10
   5   2  16   24.80    4.40
   5   2  16   24.00   14.10
   0  -3 -16   26.20   32.40
   0  -3  16  105.49   17.70
  -1   3  16   53.59   10.30
  -1  -3 -16    4.70   53.39
  -1  -3  16   62.29   29.60
   1   3  16   43.30    8.90
  -1   3 -16   15.90   28.90
  -1  -3  16   45.70    9.40
   1  -3 -16    1.70   57.29
  -2   3  16   -3.80    5.50
  -2   3  16    6.20    3.90
   2   3  16    8.20    4.40
  -2  -3  16   17.00    6.00
   3  -3  16   12.00    4.90
  -3   3  16   22.00    4.90
  -3   3  16   19.30    5.20
   3   3  16   18.60    4.10
  -3  -3  16   14.80    6.30
   3   3  16   21.00    6.40
  -3  -3  16   59.69   17.80
   4  -3  16   16.60    4.40
  -4   3  16   23.80    5.40
  -4  -3  16   15.80    6.30
   4   3  16   23.20    8.90
   4   3  16   -0.20   12.50
   4   3  16   15.50    3.20
  -5   3  16   22.30    5.40
   5  -3  16   30.10    5.40
  -5   3  16    6.40    6.30
   5   3  16   23.80    4.20
  -5  -3  16   60.99   22.10
   5   3  16    4.60    9.20
  -5  -3  16   11.70    5.30
   0   4  16   -3.80    3.80
  -1  -4 -16   28.50   16.20
  -2   4  16   24.00    4.60
  -2   4  16   11.00    4.60
   2   4  16   21.50    4.70
  -2  -4  16   15.50    7.00
   2   4  16   14.20    4.70
  -3   4  16    8.20    4.10
  -3   4  16    1.30    3.60
   3   4  16    3.50    2.80
  -3  -4  16   18.70    6.10
   3   4  16   14.40    4.80
  -4   4  16   19.60    5.70
  -4   4  16   14.80    4.90
  -4  -4  16   13.30    6.00
  -4  -4  16   13.40   37.80
   4   4  16   13.80    7.50
  -5  -4 -16    3.70    9.40
   5  -4  16   -4.60    3.00
   5   4  16    0.50    1.40
  -5  -4  16    0.70    4.30
   0   5  16   36.00    8.00
   0   5  16   48.70    8.00
  -2  -5 -16   28.20   14.50
  -2   5  16    4.30    8.80
  -2   5  16    0.10    3.50
   2   5  16    1.60    3.10
   2   5  16    5.20    3.60
  -3   5  16   37.40    8.80
  -3   5  16   37.00    7.10
  -3  -5  16   16.60    9.00
   3   5  16   36.50    8.00
  -4   5  16   28.40    5.30
   4  -5  16   23.40    5.20
  -4   5  16   17.60    5.70
   4   5  16   26.50    4.50
  -4  -5  16   14.40    6.00
   0   6  16   14.20    4.40
  -1   6  16   11.60    4.40
   1   6  16   10.10    4.00
   1   6  16    6.50    4.20
  -2   6  16   29.60    7.80
   2   6  16   31.80    6.80
   3  -6  16    5.50    3.60
  -3   6  16    4.30    4.40
  -3  -6 -16   33.60   16.90
   3   6  16    8.10    3.90
   3   6  16   12.40    3.00
   0   0  17    5.50    4.90
   1   0  17   69.79   12.00
  -1   0  17   55.89   11.00
   2   0  17    6.40    8.30
  -2   0  17   -3.50    3.80
   3   0  17    2.40    5.30
  -3   0  17   -1.80    4.20
   4   0  17    5.20    2.90
  -4   0  17    0.30    8.60
   4   0 -17    2.50   10.00
   4   0  17    0.30    4.80
  -4   0  17    2.00    4.10
  -5   0  17    5.90    4.50
   5   0 -17    0.10    7.00
   5   0  17    1.30    2.90
   5   0  17   16.00    5.20
   0   1  17   -0.40    3.20
   0  -1  17    7.70    5.40
   1  -1  17   25.20   10.60
  -1   1  17   11.50    4.20
   1   1  17   15.60    5.00
  -1  -1  17   11.90    5.10
  -2   1  17   17.50    4.80
   2  -1  17    7.60    6.30
   2   1  17   26.70    7.20
  -2  -1  17    8.20    4.50
   3  -1  17    6.40    4.60
  -3   1  17    7.20    4.10
  -3  -1  17    5.10    4.20
   3  -1 -17   18.90   13.30
  -4   1  17   -0.20    5.90
  -4   1  17   10.00    5.00
   4   1 -17   19.60    8.50
   4  -1  17    3.60    3.00
   4   1  17    6.40    5.40
   4   1  17    1.20    2.20
  -4  -1  17    5.50    4.80
   5   1 -17   23.20    7.20
  -5   1  17    7.40    3.90
   5  -1  17    3.50    2.70
  -5   1  17   -3.40    8.70
   5   1  17    9.80    2.90
  -5  -1  17    6.40    3.80
   5   1  17    9.70    3.80
  -1   2  17   34.10    8.20
  -1  -2  17   48.10    9.40
   1   2  17   43.70    8.30
   2  -2  17    7.50    4.90
  -2   2  17    1.50    3.50
  -2  -2  17   10.10    4.90
  -3   2  17   11.20    5.00
   3  -2  17   13.60    4.50
  -3  -2  17   12.40    5.50
   3   2  17   10.30    2.80
   4  -2  17   11.80    4.00
  -4   2  17   30.50    5.70
  -4  -2  17   14.10    5.00
   4   2  17   21.80    3.90
   0   3  17    2.60    3.50
   2  -3  17    6.60    4.50
  -2   3  17    2.90    3.40
  -2  -3  17    5.50    5.80
   2   3  17   15.10    4.50
   3  -3  17    2.40    3.40
  -3   3  17    4.30    3.60
  -3   3  17    2.00   10.20
   3   3  17    8.20    2.50
   3   3  17    6.20    6.10
  -3  -3  17   21.70    5.90
  -4   3  17    7.90    5.50
  -4   3  17    5.40    5.00
   4  -3  17    6.50    3.10
   4   3  17   10.00    2.40
   0   4  17   62.09   10.60
  -1   4  17    1.10    3.30
   1   4  17   11.10    3.50
   1   4  17    8.30    3.80
  -2   4  17   25.20    5.20
   2  -4  17   15.70    4.90
   2   4  17   20.60    4.70
   2   4  17   15.50    3.80
  -2  -4  17   20.40    8.50
  -3   4  17   39.30   10.00
   3  -4  17   51.79   11.30
  -3  -4 -17   91.59   19.90
   3   4  17   55.99    8.70
   3   4  17   55.89    9.40
   0   5  17   23.20    5.50
  -1   5  17    9.00    3.90
   1   5  17    2.70    3.50
   1   5  17   13.70    3.80
   2  -5  17   43.10    9.20
   2   5  17   61.49    8.90
   2   5  17   50.49    8.70
   0   0  18    7.50    4.30
  -1   0  18   38.90    8.00
  -2   0  18   15.70    4.70
   2   0 -18   36.20   13.70
   3   0  18    6.90    3.40
  -3   0  18    8.10    4.00
   3   0 -18    3.20   10.20
   0  -1  18   21.10    7.20
   0   1  18   19.30    4.70
  -1   1  18    6.60    3.30
  -1  -1  18    2.50    4.30
   1   1  18   16.20    4.80
  -2   1  18   10.90    4.20
  -2  -1  18    7.80    4.40
  -3   1  18   16.80    4.90
   3  -1  18   23.80    7.50
   3   1 -18   20.20    9.20
   3  -1  18   26.80    4.50
   3   1  18   15.60    3.60
  -3  -1  18   23.70    5.50
   0   2  18   42.30    7.90
  -1   2  18    2.80    2.90
   1   2  18    8.60    4.40
   2  -2  18   10.20    6.30
  -2   2  18    7.20    3.50
   2   2  18   17.40    5.40
  -2  -2  18   -3.20    6.90
   3   2 -18   33.50    8.70
  -3  -2  18    7.30    5.60
   0   3  18    7.10    3.40
   1  -3  18   12.80    8.10
  -1   3  18    4.20    2.90
   1   3  18   -2.00    2.40
   1   3  18    6.80    5.00
  -1  -3  18   24.00   10.70
   2  -3  18    4.40    5.10
  -2   3  18   10.00    4.70
  -2  -3  18    2.60    5.90
   0   4  18   10.40    3.70
   0   4  18   22.50    5.20
  -1   4  18   25.40    5.50
   1   4  18   23.40    4.90
   1   4  18   17.90    4.60
   0   0  19    2.50    7.50
  -1   0  19    9.10    4.10
   0   1  19    5.30    4.20
  -1   1  19   11.70    4.10
  -1  -1  19   16.40    5.20
   0   2  19   -0.30    4.00

_computing_structure_solution     'SHELXT 2014/4 (Sheldrick, 2014)'
;
_shelx_hkl_checksum   57261
